# Supplementary material for: NEK1 kinase domain structure and its dynamic protein interactome after exposure to Cisplatin
Source: Sci Rep. 2017 Jul 14;7:5445. doi: 10.1038/s41598-017-05325-w (PMC5511132; doi:10.1038/s41598-017-05325-w)
Supplement: Supplementary file 1 — supplementary tables S1–S6 [file 41598_2017_5325_MOESM1_ESM.xlsx]

## Sheet: Table S1
Table S1. List of all identified proteins in NEK1 IP-LC-MS/MS from untreated cells.
Protein IDs	Intensity FLAG-1	Intensity FLAG-2	Intensity FLAG-3	Intensity NEK-1	Intensity NEK-2	Intensity NEK-3	LFQ intensity FLAG-1	LFQ intensity FLAG-2	LFQ intensity FLAG-3	LFQ intensity NEK-1	LFQ intensity NEK-2	LFQ intensity NEK-3	MS/MS Count FLAG-1	MS/MS Count FLAG-2	MS/MS Count FLAG-3	MS/MS Count NEK-1	MS/MS Count NEK-2	MS/MS Count NEK-3
>sp|O14802|RPC1_HUMAN DNA-directed RNA polymerase III subunit RPC1 OS=Homo sapiens GN=POLR3A PE=1 SV=2	0	0	0	550940	127730	0	0	0	0	335120	113640	0	0	0	0	1	0	0
>sp|O14981|BTAF1_HUMAN TATA-binding protein-associated factor 172 OS=Homo sapiens GN=BTAF1 PE=1 SV=2	0	0	0	1322300	782800	1079000	0	0	0	692630	588270	765480	0	0	0	0	0	1
>sp|O43150|ASAP2_HUMAN Arf-GAP with SH3 domain, ANK repeat and PH domain-containing protein 2 OS=Homo sapiens GN=ASAP2 PE=1 SV=3;>sp|O43150-2|ASAP2_HUMAN Isoform 2 of Arf-GAP with SH3 domain, ANK repeat and PH domain-containing protein 2 OS=Homo sapiens GN=ASAP2	0	0	0	25388000	33193000	14555000	0	0	0	15913000	23340000	12912000	0	0	0	0	1	0
>sp|O60271|JIP4_HUMAN C-Jun-amino-terminal kinase-interacting protein 4 OS=Homo sapiens GN=SPAG9 PE=1 SV=4;>sp|O60271-2|JIP4_HUMAN Isoform 2 of C-Jun-amino-terminal kinase-interacting protein 4 OS=Homo sapiens GN=SPAG9;>sp|O60271-4|JIP4_HUMAN Isoform 4 of C-Jun-amino-terminal kinase-interacting protein 4 OS=Homo sapiens GN=SPAG9;>sp|O60271-9|JIP4_HUMAN Isoform 6 of C-Jun-amino-terminal kinase-int…	0	0	0	600470	623600	0	0	0	0	379120	364490	0	0	0	0	1	0	0
>sp|O75165|DJC13_HUMAN DnaJ homolog subfamily C member 13 OS=Homo sapiens GN=DNAJC13 PE=1 SV=5	0	0	0	7071300	6144800	6683100	0	0	0	3793400	4032200	3844600	0	0	0	4	2	2
>sp|O75694|NU155_HUMAN Nuclear pore complex protein Nup155 OS=Homo sapiens GN=NUP155 PE=1 SV=1;>tr|E9PF10|E9PF10_HUMAN Nuclear pore complex protein Nup155 OS=Homo sapiens GN=NUP155 PE=2 SV=1;>sp|O75694-2|NU155_HUMAN Isoform 2 of Nuclear pore complex protein Nup155 OS=Homo sapiens GN=NUP155	0	0	0	872090	954380	1786000	0	0	0	668700	815390	794690	0	0	0	0	1	1
>tr|B7Z888|B7Z888_HUMAN Protein SCAF8 OS=Homo sapiens GN=SCAF8 PE=2 SV=1;>sp|Q9UPN6|SCAF8_HUMAN Protein SCAF8 OS=Homo sapiens GN=SCAF8 PE=1 SV=1;>sp|O95104|SFR15_HUMAN Splicing factor, arginine/serine-rich 15 OS=Homo sapiens GN=SCAF4 PE=1 SV=3;>sp|O95104-3|SFR15_HUMAN Isoform 3 of Splicing factor, arginine/serine-rich 15 OS=Homo sapiens GN=SCAF4;>sp|O95104-2|SFR15_HUMAN Isoform 2 of Splicing fact…	0	0	0	3959700	5369000	1640900	0	0	0	961450	5567600	618520	0	0	0	0	1	0
>sp|P01605|KV113_HUMAN Ig kappa chain V-I region Lay OS=Homo sapiens PE=1 SV=1	0	0	0	3405200	14942000	0	0	0	0	1450100	8306000	0	0	0	0	1	0	0
>sp|P11182|ODB2_HUMAN Lipoamide acyltransferase component of branched-chain alpha-keto acid dehydrogenase complex, mitochondrial OS=Homo sapiens GN=DBT PE=1 SV=3;>tr|Q5VVL7|Q5VVL7_HUMAN Lipoamide acyltransferase component of branched-chain alpha-keto acid dehydrogenase complex, mitochondrial OS=Homo sapiens GN=DBT PE=2 SV=1	0	0	0	4054700	868360	515180	0	0	0	2037300	0	0	0	0	0	1	1	0
>sp|P11532|DMD_HUMAN Dystrophin OS=Homo sapiens GN=DMD PE=1 SV=3;>tr|E9PDN5|E9PDN5_HUMAN Dystrophin OS=Homo sapiens GN=DMD PE=2 SV=1;>sp|P11532-4|DMD_HUMAN Isoform 3 of Dystrophin OS=Homo sapiens GN=DMD;>sp|P11532-2|DMD_HUMAN Isoform 1 of Dystrophin OS=Homo sapiens GN=DMD;>sp|P11532-3|DMD_HUMAN Isoform 2 of Dystrophin OS=Homo sapiens GN=DMD	0	0	0	64991000	45154000	51733000	0	0	0	39718000	30959000	33988000	0	0	0	1	0	0
>sp|P13646|K1C13_HUMAN Keratin, type I cytoskeletal 13 OS=Homo sapiens GN=KRT13 PE=1 SV=4;CON__P13646-1;>sp|P13646-3|K1C13_HUMAN Isoform 3 of Keratin, type I cytoskeletal 13 OS=Homo sapiens GN=KRT13;CON__ENSEMBL:ENSP00000377550;>tr|K7ERE3|K7ERE3_HUMAN Keratin, type I cytoskeletal 13 OS=Homo sapiens GN=KRT13 PE=2 SV=1;>sp|P13646-2|K1C13_HUMAN Isoform 2 of Keratin, type I cytoskeletal 13 OS=Homo sa…	0	0	0	0	934770	642210	0	0	0	0	1239200	997970	0	0	0	0	0	0
>sp|P15924|DESP_HUMAN Desmoplakin OS=Homo sapiens GN=DSP PE=1 SV=3;>sp|P15924-2|DESP_HUMAN Isoform DPII of Desmoplakin OS=Homo sapiens GN=DSP	0	0	0	689040	581980	1048200	0	0	0	326310	451100	766990	0	0	0	0	1	1
>sp|P17655|CAN2_HUMAN Calpain-2 catalytic subunit OS=Homo sapiens GN=CAPN2 PE=1 SV=6;>sp|P17655-2|CAN2_HUMAN Isoform 2 of Calpain-2 catalytic subunit OS=Homo sapiens GN=CAPN2	0	0	0	1358700	1615300	0	0	0	0	1542800	1344600	0	0	0	0	0	0	0
>sp|P21333|FLNA_HUMAN Filamin-A OS=Homo sapiens GN=FLNA PE=1 SV=4;>sp|P21333-2|FLNA_HUMAN Isoform 2 of Filamin-A OS=Homo sapiens GN=FLNA;>tr|Q5HY54|Q5HY54_HUMAN Filamin-A OS=Homo sapiens GN=FLNA PE=2 SV=1	0	0	0	106790000	103540000	47427000	0	0	0	42521000	79933000	45266000	0	0	0	10	15	5
>sp|P27708|PYR1_HUMAN CAD protein OS=Homo sapiens GN=CAD PE=1 SV=3;>tr|F8VPD4|F8VPD4_HUMAN CAD protein OS=Homo sapiens GN=CAD PE=2 SV=1	0	0	0	6357000	3184500	7007600	0	0	0	4141200	2230100	4226700	0	0	0	2	1	1
>tr|E7EVA0|E7EVA0_HUMAN Microtubule-associated protein OS=Homo sapiens GN=MAP4 PE=2 SV=1;>sp|P27816|MAP4_HUMAN Microtubule-associated protein 4 OS=Homo sapiens GN=MAP4 PE=1 SV=3;>sp|P27816-6|MAP4_HUMAN Isoform 6 of Microtubule-associated protein 4 OS=Homo sapiens GN=MAP4;>sp|P27816-2|MAP4_HUMAN Isoform 2 of Microtubule-associated protein 4 OS=Homo sapiens GN=MAP4;>tr|E9PGM5|E9PGM5_HUMAN Microtubu…	0	0	0	9010800	7679600	6687500	0	0	0	4935600	5977000	3671400	0	0	0	1	2	0
>sp|P35998|PRS7_HUMAN 26S protease regulatory subunit 7 OS=Homo sapiens GN=PSMC2 PE=1 SV=3;>tr|B7Z5E2|B7Z5E2_HUMAN 26S protease regulatory subunit 7 OS=Homo sapiens GN=PSMC2 PE=2 SV=1	0	0	0	0	4057000	3216200	0	0	0	0	0	1370200	0	0	0	0	1	1
>sp|P42285|SK2L2_HUMAN Superkiller viralicidic activity 2-like 2 OS=Homo sapiens GN=SKIV2L2 PE=1 SV=3;>tr|F5H7E2|F5H7E2_HUMAN Superkiller viralicidic activity 2-like 2 OS=Homo sapiens GN=SKIV2L2 PE=2 SV=1;>tr|H0Y8U3|H0Y8U3_HUMAN Superkiller viralicidic activity 2-like 2 (Fragment) OS=Homo sapiens GN=SKIV2L2 PE=4 SV=1	0	0	0	1514400	520830	0	0	0	0	1654500	259600	0	0	0	0	1	0	0
>sp|P48634|PRC2A_HUMAN Protein PRRC2A OS=Homo sapiens GN=PRRC2A PE=1 SV=3;>sp|P48634-3|PRC2A_HUMAN Isoform 3 of Protein PRRC2A OS=Homo sapiens GN=PRRC2A;>sp|P48634-2|PRC2A_HUMAN Isoform 2 of Protein PRRC2A OS=Homo sapiens GN=PRRC2A;>sp|P48634-4|PRC2A_HUMAN Isoform 4 of Protein PRRC2A OS=Homo sapiens GN=PRRC2A	0	0	0	4612100	2396100	2163400	0	0	0	2499000	1630100	1904000	0	0	0	2	0	0
>tr|F6QR24|F6QR24_HUMAN Nuclear pore complex protein Nup153 OS=Homo sapiens GN=NUP153 PE=2 SV=1;>sp|P49790|NU153_HUMAN Nuclear pore complex protein Nup153 OS=Homo sapiens GN=NUP153 PE=1 SV=2	0	0	0	1953600	1962200	2273200	0	0	0	1124600	1313700	1373900	0	0	0	0	0	0
>sp|P49792|RBP2_HUMAN E3 SUMO-protein ligase RanBP2 OS=Homo sapiens GN=RANBP2 PE=1 SV=2	0	0	0	741860	0	646960	0	0	0	413060	0	462020	0	0	0	1	0	0
>sp|P61626|LYSC_HUMAN Lysozyme C OS=Homo sapiens GN=LYZ PE=1 SV=1;>tr|F8VV32|F8VV32_HUMAN Lysozyme C OS=Homo sapiens GN=LYZ PE=2 SV=1	0	0	0	396330000	603100	163400	0	0	0	0	0	96406	0	0	0	1	0	0
>sp|P98175|RBM10_HUMAN RNA-binding protein 10 OS=Homo sapiens GN=RBM10 PE=1 SV=3;>sp|P98175-2|RBM10_HUMAN Isoform 2 of RNA-binding protein 10 OS=Homo sapiens GN=RBM10;>sp|P98175-3|RBM10_HUMAN Isoform 3 of RNA-binding protein 10 OS=Homo sapiens GN=RBM10;>sp|P98175-4|RBM10_HUMAN Isoform 4 of RNA-binding protein 10 OS=Homo sapiens GN=RBM10	0	0	0	5065200	1413400	0	0	0	0	1996400	1584300	0	0	0	0	1	1	0
>tr|G3V0I6|G3V0I6_HUMAN OTU domain containing 4, isoform CRA_f OS=Homo sapiens GN=OTUD4 PE=2 SV=1;>sp|Q01804|OTUD4_HUMAN OTU domain-containing protein 4 OS=Homo sapiens GN=OTUD4 PE=1 SV=3;>sp|Q01804-3|OTUD4_HUMAN Isoform 3 of OTU domain-containing protein 4 OS=Homo sapiens GN=OTUD4	0	0	0	1428400	1828000	798410	0	0	0	795340	1382800	570180	0	0	0	0	1	1
>sp|Q07065|CKAP4_HUMAN Cytoskeleton-associated protein 4 OS=Homo sapiens GN=CKAP4 PE=1 SV=2	0	0	0	2683300	0	1985000	0	0	0	1810200	0	3289300	0	0	0	1	0	1
>sp|Q12866|MERTK_HUMAN Tyrosine-protein kinase Mer OS=Homo sapiens GN=MERTK PE=1 SV=2;>tr|E9PHX8|E9PHX8_HUMAN Tyrosine-protein kinase Mer OS=Homo sapiens GN=MERTK PE=2 SV=1	0	0	0	0	3518200	3928800	0	0	0	0	2461900	5117600	0	0	0	0	1	0
>sp|Q13576|IQGA2_HUMAN Ras GTPase-activating-like protein IQGAP2 OS=Homo sapiens GN=IQGAP2 PE=1 SV=4;>tr|E7EWC2|E7EWC2_HUMAN Ras GTPase-activating-like protein IQGAP2 (Fragment) OS=Homo sapiens GN=IQGAP2 PE=2 SV=1;>tr|F5H7S7|F5H7S7_HUMAN Ras GTPase-activating-like protein IQGAP2 OS=Homo sapiens GN=IQGAP2 PE=2 SV=1;>sp|Q13576-2|IQGA2_HUMAN Isoform 2 of Ras GTPase-activating-like protein IQGAP2 OS=…	0	0	0	26340000	17481000	20645000	0	0	0	16860000	11624000	12108000	0	0	0	1	0	1
>sp|Q14692|BMS1_HUMAN Ribosome biogenesis protein BMS1 homolog OS=Homo sapiens GN=BMS1 PE=1 SV=1	0	0	0	26401000	24893000	18877000	0	0	0	15058000	18029000	10937000	0	0	0	5	3	0
>sp|Q15021|CND1_HUMAN Condensin complex subunit 1 OS=Homo sapiens GN=NCAPD2 PE=1 SV=3;>tr|F5GZJ1|F5GZJ1_HUMAN Condensin complex subunit 1 OS=Homo sapiens GN=NCAPD2 PE=2 SV=1	0	0	0	183860	864540	0	0	0	0	241240	696950	0	0	0	0	0	0	0
>sp|Q15758-2|AAAT_HUMAN Isoform 2 of Neutral amino acid transporter B(0) OS=Homo sapiens GN=SLC1A5;>sp|Q15758|AAAT_HUMAN Neutral amino acid transporter B(0) OS=Homo sapiens GN=SLC1A5 PE=1 SV=2;>tr|M0QXM4|M0QXM4_HUMAN Neutral amino acid transporter B(0) OS=Homo sapiens GN=SLC1A5 PE=2 SV=1;>sp|Q15758-3|AAAT_HUMAN Isoform 3 of Neutral amino acid transporter B(0) OS=Homo sapiens GN=SLC1A5	0	0	0	2107300	2102000	1994800	0	0	0	1692900	1229100	1264100	0	0	0	1	1	0
>sp|Q16629|SRSF7_HUMAN Serine/arginine-rich splicing factor 7 OS=Homo sapiens GN=SRSF7 PE=1 SV=1;>tr|C9JAB2|C9JAB2_HUMAN Serine/arginine-rich-splicing factor 7 OS=Homo sapiens GN=SRSF7 PE=2 SV=1;>sp|Q16629-4|SRSF7_HUMAN Isoform 4 of Serine/arginine-rich splicing factor 7 OS=Homo sapiens GN=SRSF7;>sp|Q16629-2|SRSF7_HUMAN Isoform 2 of Serine/arginine-rich splicing factor 7 OS=Homo sapiens GN=SRSF7;…	0	0	0	0	4571700	4888400	0	0	0	0	3324300	3398400	0	0	0	0	0	0
>sp|Q16698|DECR_HUMAN 2,4-dienoyl-CoA reductase, mitochondrial OS=Homo sapiens GN=DECR1 PE=1 SV=1;>tr|B7Z6B8|B7Z6B8_HUMAN 2,4-dienoyl-CoA reductase, mitochondrial OS=Homo sapiens GN=DECR1 PE=2 SV=1;>tr|E5RFV2|E5RFV2_HUMAN 2,4-dienoyl-CoA reductase, mitochondrial (Fragment) OS=Homo sapiens GN=DECR1 PE=2 SV=1;>tr|E5RJG7|E5RJG7_HUMAN 2,4-dienoyl-CoA reductase, mitochondrial (Fragment) OS=Homo sapien…	0	0	0	1344800	0	3565200	0	0	0	547440	0	3869000	0	0	0	0	0	1
>sp|Q3V6T2|GRDN_HUMAN Girdin OS=Homo sapiens GN=CCDC88A PE=1 SV=2;>sp|Q3V6T2-3|GRDN_HUMAN Isoform 3 of Girdin OS=Homo sapiens GN=CCDC88A;>sp|Q3V6T2-2|GRDN_HUMAN Isoform 2 of Girdin OS=Homo sapiens GN=CCDC88A;>sp|Q3V6T2-4|GRDN_HUMAN Isoform 4 of Girdin OS=Homo sapiens GN=CCDC88A;>sp|Q3V6T2-5|GRDN_HUMAN Isoform 5 of Girdin OS=Homo sapiens GN=CCDC88A	0	0	0	9911900	18397000	26352000	0	0	0	11930000	11881000	16146000	0	0	0	3	1	4
>sp|Q562R1|ACTBL_HUMAN Beta-actin-like protein 2 OS=Homo sapiens GN=ACTBL2 PE=1 SV=2	0	0	0	10043000	14281000	15517000	0	0	0	11274000	11180000	10505000	0	0	0	0	0	1
>sp|Q5UIP0|RIF1_HUMAN Telomere-associated protein RIF1 OS=Homo sapiens GN=RIF1 PE=1 SV=2;>sp|Q5UIP0-2|RIF1_HUMAN Isoform 2 of Telomere-associated protein RIF1 OS=Homo sapiens GN=RIF1;>tr|H7C2B5|H7C2B5_HUMAN Telomere-associated protein RIF1 (Fragment) OS=Homo sapiens GN=RIF1 PE=4 SV=1	0	0	0	0	1703800	1910300	0	0	0	0	1288900	1364200	0	0	0	0	0	1
>sp|Q69YN4|VIR_HUMAN Protein virilizer homolog OS=Homo sapiens GN=KIAA1429 PE=1 SV=2;>sp|Q69YN4-3|VIR_HUMAN Isoform 3 of Protein virilizer homolog OS=Homo sapiens GN=KIAA1429;>sp|Q69YN4-2|VIR_HUMAN Isoform 2 of Protein virilizer homolog OS=Homo sapiens GN=KIAA1429;>sp|Q69YN4-4|VIR_HUMAN Isoform 4 of Protein virilizer homolog OS=Homo sapiens GN=KIAA1429	0	0	0	4964600	2801600	1969600	0	0	0	2205400	2283000	1801700	0	0	0	1	0	2
>sp|Q6P1J9|CDC73_HUMAN Parafibromin OS=Homo sapiens GN=CDC73 PE=1 SV=1	0	0	0	0	947630	4730000	0	0	0	0	1371000	2894400	0	0	0	0	0	0
>tr|F8W1S1|F8W1S1_HUMAN Keratin, type II cytoskeletal 74 OS=Homo sapiens GN=KRT74 PE=2 SV=1;>sp|Q86Y46|K2C73_HUMAN Keratin, type II cytoskeletal 73 OS=Homo sapiens GN=KRT73 PE=1 SV=1;CON__Q32MB2;>sp|Q7RTS7|K2C74_HUMAN Keratin, type II cytoskeletal 74 OS=Homo sapiens GN=KRT74 PE=1 SV=2;CON__Q7RTS7	0	0	0	27649000	8292800	7072800	0	0	0	15395000	6273300	5051000	0	0	0	1	1	1
>sp|Q7Z406-2|MYH14_HUMAN Isoform 2 of Myosin-14 OS=Homo sapiens GN=MYH14;>tr|G8JLL9|G8JLL9_HUMAN Myosin-14 OS=Homo sapiens GN=MYH14 PE=2 SV=1;>tr|F2Z2U8|F2Z2U8_HUMAN Myosin-14 OS=Homo sapiens GN=MYH14 PE=2 SV=1;>sp|Q7Z406-6|MYH14_HUMAN Isoform 6 of Myosin-14 OS=Homo sapiens GN=MYH14;>sp|Q7Z406|MYH14_HUMAN Myosin-14 OS=Homo sapiens GN=MYH14 PE=1 SV=2;>sp|Q7Z406-4|MYH14_HUMAN Isoform 4 of Myosin-14…	0	0	0	9207900	3043400	10648000	0	0	0	3957600	1535400	4223800	0	0	0	4	1	1
>sp|Q86UK7|ZN598_HUMAN Zinc finger protein 598 OS=Homo sapiens GN=ZNF598 PE=1 SV=1;>sp|Q86UK7-3|ZN598_HUMAN Isoform 3 of Zinc finger protein 598 OS=Homo sapiens GN=ZNF598;>sp|Q86UK7-2|ZN598_HUMAN Isoform 2 of Zinc finger protein 598 OS=Homo sapiens GN=ZNF598;>tr|H3BQQ2|H3BQQ2_HUMAN Zinc finger protein 598 OS=Homo sapiens GN=ZNF598 PE=2 SV=1	0	0	0	16091000	0	689070	0	0	0	8354700	0	461820	0	0	0	0	0	1
>sp|Q8IWJ2|GCC2_HUMAN GRIP and coiled-coil domain-containing protein 2 OS=Homo sapiens GN=GCC2 PE=1 SV=4;>tr|B8ZZW2|B8ZZW2_HUMAN GRIP and coiled-coil domain-containing protein 2 (Fragment) OS=Homo sapiens GN=GCC2 PE=2 SV=1;>tr|B8ZZA5|B8ZZA5_HUMAN GRIP and coiled-coil domain-containing protein 2 OS=Homo sapiens GN=GCC2 PE=2 SV=1;>tr|U3KPU4|U3KPU4_HUMAN GRIP and coiled-coil domain-containing protei…	0	0	0	1215100	5296300	0	0	0	0	676530	4006500	0	0	0	0	0	1	0
>sp|Q8NC96|NECP1_HUMAN Adaptin ear-binding coat-associated protein 1 OS=Homo sapiens GN=NECAP1 PE=1 SV=2;>sp|Q9NVZ3-2|NECP2_HUMAN Isoform 2 of Adaptin ear-binding coat-associated protein 2 OS=Homo sapiens GN=NECAP2;>sp|Q9NVZ3|NECP2_HUMAN Adaptin ear-binding coat-associated protein 2 OS=Homo sapiens GN=NECAP2 PE=1 SV=1;>sp|Q9NVZ3-4|NECP2_HUMAN Isoform 4 of Adaptin ear-binding coat-associated prote…	0	0	0	36682000	27627000	27063000	0	0	0	16947000	23613000	16485000	0	0	0	0	1	0
>sp|Q8TDY2|RBCC1_HUMAN RB1-inducible coiled-coil protein 1 OS=Homo sapiens GN=RB1CC1 PE=1 SV=3;>sp|Q8TDY2-2|RBCC1_HUMAN Isoform 2 of RB1-inducible coiled-coil protein 1 OS=Homo sapiens GN=RB1CC1	0	0	0	9915000	2644700	10442000	0	0	0	4416700	4871200	5690300	0	0	0	2	1	4
>sp|Q92621|NU205_HUMAN Nuclear pore complex protein Nup205 OS=Homo sapiens GN=NUP205 PE=1 SV=3	0	0	0	6237000	2314700	2483600	0	0	0	4685300	1649900	1813500	0	0	0	2	2	2
>sp|Q96II8-2|LRCH3_HUMAN Isoform 2 of Leucine-rich repeat and calponin homology domain-containing protein 3 OS=Homo sapiens GN=LRCH3;>sp|Q96II8|LRCH3_HUMAN Leucine-rich repeat and calponin homology domain-containing protein 3 OS=Homo sapiens GN=LRCH3 PE=1 SV=2;>tr|B4E0T7|B4E0T7_HUMAN Leucine-rich repeat and calponin homology domain-containing protein 3 OS=Homo sapiens GN=LRCH3 PE=2 SV=1;>tr|E9PD9…	0	0	0	1453500	1788800	0	0	0	0	1330100	1536600	0	0	0	0	0	1	0
>sp|Q96K37|S35E1_HUMAN Solute carrier family 35 member E1 OS=Homo sapiens GN=SLC35E1 PE=1 SV=2	0	0	0	437840	1032800	663840	0	0	0	298680	415980	284790	0	0	0	0	0	1
>sp|Q96N67|DOCK7_HUMAN Dedicator of cytokinesis protein 7 OS=Homo sapiens GN=DOCK7 PE=1 SV=4;>sp|Q96N67-6|DOCK7_HUMAN Isoform 6 of Dedicator of cytokinesis protein 7 OS=Homo sapiens GN=DOCK7;>sp|Q96N67-2|DOCK7_HUMAN Isoform 2 of Dedicator of cytokinesis protein 7 OS=Homo sapiens GN=DOCK7;>sp|Q96N67-5|DOCK7_HUMAN Isoform 5 of Dedicator of cytokinesis protein 7 OS=Homo sapiens GN=DOCK7;>sp|Q96N67-3…	0	0	0	2933800	1021500	705700	0	0	0	1339000	827470	743740	0	0	0	0	1	0
>sp|Q9H583|HEAT1_HUMAN HEAT repeat-containing protein 1 OS=Homo sapiens GN=HEATR1 PE=1 SV=3;>tr|Q5T3Q7|Q5T3Q7_HUMAN HEAT repeat-containing protein 1 OS=Homo sapiens GN=HEATR1 PE=2 SV=1	0	0	0	379090	1051300	2460200	0	0	0	0	795290	1756900	0	0	0	1	1	1
>sp|Q9H9A5|CNO10_HUMAN CCR4-NOT transcription complex subunit 10 OS=Homo sapiens GN=CNOT10 PE=1 SV=1;>sp|Q9H9A5-2|CNO10_HUMAN Isoform 2 of CCR4-NOT transcription complex subunit 10 OS=Homo sapiens GN=CNOT10;>sp|Q9H9A5-3|CNO10_HUMAN Isoform 3 of CCR4-NOT transcription complex subunit 10 OS=Homo sapiens GN=CNOT10;>sp|Q9H9A5-4|CNO10_HUMAN Isoform 4 of CCR4-NOT transcription complex subunit 10 OS=Hom…	0	0	0	1384100	1779200	1050200	0	0	0	1277500	1404400	1165400	0	0	0	1	0	0
>sp|Q9NW13|RBM28_HUMAN RNA-binding protein 28 OS=Homo sapiens GN=RBM28 PE=1 SV=3;>sp|Q9NW13-2|RBM28_HUMAN Isoform 2 of RNA-binding protein 28 OS=Homo sapiens GN=RBM28	0	0	0	565630	0	3124600	0	0	0	1183300	0	3490900	0	0	0	0	0	0
>sp|Q9NY12|GAR1_HUMAN H/ACA ribonucleoprotein complex subunit 1 OS=Homo sapiens GN=GAR1 PE=1 SV=1;>sp|Q9NY12-2|GAR1_HUMAN Isoform 2 of H/ACA ribonucleoprotein complex subunit 1 OS=Homo sapiens GN=GAR1	0	0	0	136070	805680	251710	0	0	0	792200	1296700	606080	0	0	0	0	0	0
>sp|Q9P2E9|RRBP1_HUMAN Ribosome-binding protein 1 OS=Homo sapiens GN=RRBP1 PE=1 SV=4;>sp|Q9P2E9-2|RRBP1_HUMAN Isoform 1 of Ribosome-binding protein 1 OS=Homo sapiens GN=RRBP1;>sp|Q9P2E9-3|RRBP1_HUMAN Isoform 2 of Ribosome-binding protein 1 OS=Homo sapiens GN=RRBP1;>tr|F8W7S5|F8W7S5_HUMAN Ribosome-binding protein 1 OS=Homo sapiens GN=RRBP1 PE=2 SV=1	0	0	0	531200	2142300	1713300	0	0	0	1618100	2355700	1783100	0	0	0	0	0	2
>sp|Q9UPQ9|TNR6B_HUMAN Trinucleotide repeat-containing gene 6B protein OS=Homo sapiens GN=TNRC6B PE=1 SV=4;>sp|Q9UPQ9-1|TNR6B_HUMAN Isoform 2 of Trinucleotide repeat-containing gene 6B protein OS=Homo sapiens GN=TNRC6B;>tr|H0Y720|H0Y720_HUMAN Trinucleotide repeat-containing gene 6B protein (Fragment) OS=Homo sapiens GN=TNRC6B PE=4 SV=1	0	0	0	2565400	5152100	4237500	0	0	0	2681900	2384800	3285300	0	0	0	1	0	2
>sp|Q9Y266|NUDC_HUMAN Nuclear migration protein nudC OS=Homo sapiens GN=NUDC PE=1 SV=1	0	0	0	792660	0	906840	0	0	0	361290	0	229140	0	0	0	0	0	1
>sp|Q9Y2C4|EXOG_HUMAN Nuclease EXOG, mitochondrial OS=Homo sapiens GN=EXOG PE=1 SV=2;>tr|H7C0W6|H7C0W6_HUMAN Nuclease EXOG, mitochondrial (Fragment) OS=Homo sapiens GN=EXOG PE=4 SV=1;>tr|F8WE38|F8WE38_HUMAN Nuclease EXOG, mitochondrial OS=Homo sapiens GN=EXOG PE=2 SV=1;>tr|F8WE28|F8WE28_HUMAN Nuclease EXOG, mitochondrial OS=Homo sapiens GN=EXOG PE=2 SV=1	0	0	0	13984000	13023000	12891000	0	0	0	6867500	7725000	7467600	0	0	0	0	0	0
>sp|Q9Y4I1-3|MYO5A_HUMAN Isoform 3 of Unconventional myosin-Va OS=Homo sapiens GN=MYO5A;>tr|F8W6H6|F8W6H6_HUMAN Unconventional myosin-Va OS=Homo sapiens GN=MYO5A PE=2 SV=1;>sp|Q9Y4I1|MYO5A_HUMAN Unconventional myosin-Va OS=Homo sapiens GN=MYO5A PE=1 SV=2;>tr|G3V394|G3V394_HUMAN Unconventional myosin-Va OS=Homo sapiens GN=MYO5A PE=2 SV=1;>tr|F8WE88|F8WE88_HUMAN Unconventional myosin-Va OS=Homo sap…	0	0	0	8187300	4095400	4148500	0	0	0	2550000	3195000	2563000	0	0	0	3	1	2
>sp|Q9Y5X3|SNX5_HUMAN Sorting nexin-5 OS=Homo sapiens GN=SNX5 PE=1 SV=1;>tr|Q5QPE5|Q5QPE5_HUMAN Sorting nexin-5 (Fragment) OS=Homo sapiens GN=SNX5 PE=2 SV=1;>tr|Q5QPE4|Q5QPE4_HUMAN Sorting nexin-5 (Fragment) OS=Homo sapiens GN=SNX5 PE=2 SV=1;>tr|Q7KZN0|Q7KZN0_HUMAN Sorting nexin 5 OS=Homo sapiens GN=SNX5 PE=2 SV=1;>tr|U3KQP5|U3KQP5_HUMAN Sorting nexin-5 OS=Homo sapiens GN=SNX5 PE=4 SV=1;>tr|U3KQL…	0	0	0	0	1717700	1350900	0	0	0	0	786450	575500	0	0	0	0	1	1
>sp|Q9Y6G9|DC1L1_HUMAN Cytoplasmic dynein 1 light intermediate chain 1 OS=Homo sapiens GN=DYNC1LI1 PE=1 SV=3;>tr|E9PHI6|E9PHI6_HUMAN Cytoplasmic dynein 1 light intermediate chain 1 OS=Homo sapiens GN=DYNC1LI1 PE=2 SV=1	0	0	0	1089400	2390500	3659800	0	0	0	469290	1658700	2136500	0	0	0	1	0	0
>tr|I3L4V6|I3L4V6_HUMAN Nucleoredoxin (Fragment) OS=Homo sapiens GN=NXN PE=4 SV=1;>tr|B4DNN6|B4DNN6_HUMAN Nucleoredoxin OS=Homo sapiens GN=NXN PE=2 SV=1	0	0	0	14118000	31076000	8199500	0	0	0	7913100	17331000	8649800	0	0	0	1	0	0

## Sheet: Table S2
Table S2. List of all identified proteins in NEK1 IP-LC-MS/MS from cisplatin treated cells.
Protein IDs	Intensity FLAG+1	Intensity FLAG+2	Intensity FLAG+3	Intensity NEK+1	Intensity NEK+2	Intensity NEK+3	LFQ intensity FLAG+1	LFQ intensity FLAG+2	LFQ intensity FLAG+3	LFQ intensity NEK+1	LFQ intensity NEK+2	LFQ intensity NEK+3	MS/MS Count FLAG+1	MS/MS Count FLAG+2	MS/MS Count FLAG+3	MS/MS Count NEK+1	MS/MS Count NEK+2	MS/MS Count NEK+3
>sp|A0FGR8-2|ESYT2_HUMAN Isoform 2 of Extended synaptotagmin-2 OS=Homo sapiens GN=ESYT2;>tr|H7BXI1|H7BXI1_HUMAN Extended synaptotagmin-2 (Fragment) OS=Homo sapiens GN=ESYT2 PE=2 SV=1;>sp|A0FGR8-6|ESYT2_HUMAN Isoform 6 of Extended synaptotagmin-2 OS=Homo sapiens GN=ESYT2;>sp|A0FGR8|ESYT2_HUMAN Extended synaptotagmin-2 OS=Homo sapiens GN=ESYT2 PE=1 SV=1;>sp|A0FGR8-4|ESYT2_HUMAN Isoform 4 of Extende…	0	0	0	303030	158540	196130	0	0	0	1076600	823270	926960	0	0	0	0	0	0
>sp|O14617-5|AP3D1_HUMAN Isoform 5 of AP-3 complex subunit delta-1 OS=Homo sapiens GN=AP3D1;>sp|O14617|AP3D1_HUMAN AP-3 complex subunit delta-1 OS=Homo sapiens GN=AP3D1 PE=1 SV=1;>sp|O14617-2|AP3D1_HUMAN Isoform 2 of AP-3 complex subunit delta-1 OS=Homo sapiens GN=AP3D1;>tr|G5E988|G5E988_HUMAN AP-3 complex subunit delta-1 OS=Homo sapiens GN=AP3D1 PE=2 SV=1;>sp|O14617-4|AP3D1_HUMAN Isoform 4 of AP…	0	0	0	877280	3780600	725990	0	0	0	544570	2888700	405870	0	0	0	1	0	1
>sp|O14981|BTAF1_HUMAN TATA-binding protein-associated factor 172 OS=Homo sapiens GN=BTAF1 PE=1 SV=2	0	0	0	733850	376840	286210	0	0	0	482970	321380	169650	0	0	0	1	0	1
>sp|O43150|ASAP2_HUMAN Arf-GAP with SH3 domain, ANK repeat and PH domain-containing protein 2 OS=Homo sapiens GN=ASAP2 PE=1 SV=3;>sp|O43150-2|ASAP2_HUMAN Isoform 2 of Arf-GAP with SH3 domain, ANK repeat and PH domain-containing protein 2 OS=Homo sapiens GN=ASAP2	0	0	0	27131000	39014000	23311000	0	0	0	18012000	24726000	13939000	0	0	0	1	0	1
>sp|O75190|DNJB6_HUMAN DnaJ homolog subfamily B member 6 OS=Homo sapiens GN=DNAJB6 PE=1 SV=2;>sp|O75190-3|DNJB6_HUMAN Isoform C of DnaJ homolog subfamily B member 6 OS=Homo sapiens GN=DNAJB6;>sp|O75190-2|DNJB6_HUMAN Isoform B of DnaJ homolog subfamily B member 6 OS=Homo sapiens GN=DNAJB6;>tr|C9J2C4|C9J2C4_HUMAN DnaJ homolog subfamily B member 6 (Fragment) OS=Homo sapiens GN=DNAJB6 PE=2 SV=1;>tr|E…	0	0	0	1260100	1534400	942030	0	0	0	727490	875860	632820	0	0	0	0	0	0
>sp|O75694|NU155_HUMAN Nuclear pore complex protein Nup155 OS=Homo sapiens GN=NUP155 PE=1 SV=1;>tr|E9PF10|E9PF10_HUMAN Nuclear pore complex protein Nup155 OS=Homo sapiens GN=NUP155 PE=2 SV=1;>sp|O75694-2|NU155_HUMAN Isoform 2 of Nuclear pore complex protein Nup155 OS=Homo sapiens GN=NUP155	0	0	0	687480	0	981550	0	0	0	510960	0	734400	0	0	0	1	0	0
>sp|O94830|DDHD2_HUMAN Phospholipase DDHD2 OS=Homo sapiens GN=DDHD2 PE=1 SV=2;>tr|H0YF30|H0YF30_HUMAN Phospholipase DDHD2 (Fragment) OS=Homo sapiens GN=DDHD2 PE=4 SV=1	0	0	0	6803700	0	4246600	0	0	0	4303600	0	3561300	0	0	0	0	0	0
>tr|B7Z888|B7Z888_HUMAN Protein SCAF8 OS=Homo sapiens GN=SCAF8 PE=2 SV=1;>sp|Q9UPN6|SCAF8_HUMAN Protein SCAF8 OS=Homo sapiens GN=SCAF8 PE=1 SV=1;>sp|O95104|SFR15_HUMAN Splicing factor, arginine/serine-rich 15 OS=Homo sapiens GN=SCAF4 PE=1 SV=3;>sp|O95104-3|SFR15_HUMAN Isoform 3 of Splicing factor, arginine/serine-rich 15 OS=Homo sapiens GN=SCAF4;>sp|O95104-2|SFR15_HUMAN Isoform 2 of Splicing fact…	0	0	0	281370	227710	303330	0	0	0	246700	228410	243080	0	0	0	0	0	0
>sp|O95251|KAT7_HUMAN Histone acetyltransferase KAT7 OS=Homo sapiens GN=KAT7 PE=1 SV=1;>sp|O95251-4|KAT7_HUMAN Isoform 4 of Histone acetyltransferase KAT7 OS=Homo sapiens GN=KAT7;>tr|G3V125|G3V125_HUMAN Histone acetyltransferase KAT7 OS=Homo sapiens GN=KAT7 PE=2 SV=1;>tr|E7EUP3|E7EUP3_HUMAN Histone acetyltransferase KAT7 OS=Homo sapiens GN=KAT7 PE=2 SV=1;>tr|D6RFZ5|D6RFZ5_HUMAN Histone acetyltran…	0	0	0	1296600	1018100	843680	0	0	0	952610	837960	711570	0	0	0	0	1	1
>sp|P01605|KV113_HUMAN Ig kappa chain V-I region Lay OS=Homo sapiens PE=1 SV=1	0	0	0	2634700	0	7087800	0	0	0	3527900	0	5208500	0	0	0	0	0	0
>sp|P01860|IGHG3_HUMAN Ig gamma-3 chain C region OS=Homo sapiens GN=IGHG3 PE=1 SV=2;>sp|P01857|IGHG1_HUMAN Ig gamma-1 chain C region OS=Homo sapiens GN=IGHG1 PE=1 SV=1;>sp|P01861|IGHG4_HUMAN Ig gamma-4 chain C region OS=Homo sapiens GN=IGHG4 PE=1 SV=1	0	0	0	3783400	0	527160	0	0	0	2833000	0	1144800	0	0	0	1	0	0
>sp|P02760|AMBP_HUMAN Protein AMBP OS=Homo sapiens GN=AMBP PE=1 SV=1;>tr|S4R471|S4R471_HUMAN Protein AMBP (Fragment) OS=Homo sapiens GN=AMBP PE=4 SV=1	0	0	0	779470	0	1447900	0	0	0	658430	0	613220	0	0	0	1	0	0
>sp|P04259|K2C6B_HUMAN Keratin, type II cytoskeletal 6B OS=Homo sapiens GN=KRT6B PE=1 SV=5	0	0	0	5774300	0	10606000	0	0	0	3417300	0	3156800	0	0	0	0	0	2
>sp|P07195|LDHB_HUMAN L-lactate dehydrogenase B chain OS=Homo sapiens GN=LDHB PE=1 SV=2;>tr|A8MW50|A8MW50_HUMAN L-lactate dehydrogenase (Fragment) OS=Homo sapiens GN=LDHB PE=2 SV=1;>tr|C9J7H8|C9J7H8_HUMAN L-lactate dehydrogenase B chain (Fragment) OS=Homo sapiens GN=LDHB PE=2 SV=1	0	0	0	3499100	3607600	0	0	0	0	1282800	1122000	0	0	0	0	0	0	0
>sp|P11532|DMD_HUMAN Dystrophin OS=Homo sapiens GN=DMD PE=1 SV=3;>tr|E9PDN5|E9PDN5_HUMAN Dystrophin OS=Homo sapiens GN=DMD PE=2 SV=1;>sp|P11532-4|DMD_HUMAN Isoform 3 of Dystrophin OS=Homo sapiens GN=DMD;>sp|P11532-2|DMD_HUMAN Isoform 1 of Dystrophin OS=Homo sapiens GN=DMD;>sp|P11532-3|DMD_HUMAN Isoform 2 of Dystrophin OS=Homo sapiens GN=DMD	0	0	0	53529000	179480000	57554000	0	0	0	31306000	131260000	31070000	0	0	0	0	1	0
>sp|P12235|ADT1_HUMAN ADP/ATP translocase 1 OS=Homo sapiens GN=SLC25A4 PE=1 SV=4	0	0	0	0	4516300	622020	0	0	0	0	836900	488400	0	0	0	0	0	0
>sp|P12883|MYH7_HUMAN Myosin-7 OS=Homo sapiens GN=MYH7 PE=1 SV=5	0	0	0	0	1259400	9354600	0	0	0	0	865270	1525700	0	0	0	0	0	0
>sp|P15924|DESP_HUMAN Desmoplakin OS=Homo sapiens GN=DSP PE=1 SV=3;>sp|P15924-2|DESP_HUMAN Isoform DPII of Desmoplakin OS=Homo sapiens GN=DSP	0	0	0	1130200	472840	274380	0	0	0	767240	340020	165100	0	0	0	1	1	0
>sp|P21333|FLNA_HUMAN Filamin-A OS=Homo sapiens GN=FLNA PE=1 SV=4;>sp|P21333-2|FLNA_HUMAN Isoform 2 of Filamin-A OS=Homo sapiens GN=FLNA;>tr|Q5HY54|Q5HY54_HUMAN Filamin-A OS=Homo sapiens GN=FLNA PE=2 SV=1	0	0	0	1707400	487130	491300	0	0	0	1782500	2217700	2001700	0	0	0	0	0	0
>tr|E7EVA0|E7EVA0_HUMAN Microtubule-associated protein OS=Homo sapiens GN=MAP4 PE=2 SV=1;>sp|P27816|MAP4_HUMAN Microtubule-associated protein 4 OS=Homo sapiens GN=MAP4 PE=1 SV=3;>sp|P27816-6|MAP4_HUMAN Isoform 6 of Microtubule-associated protein 4 OS=Homo sapiens GN=MAP4;>sp|P27816-2|MAP4_HUMAN Isoform 2 of Microtubule-associated protein 4 OS=Homo sapiens GN=MAP4;>tr|E9PGM5|E9PGM5_HUMAN Microtubu…	0	0	0	643680	3122500	1123700	0	0	0	1523500	1991100	1036100	0	0	0	1	0	1
>sp|P35251|RFC1_HUMAN Replication factor C subunit 1 OS=Homo sapiens GN=RFC1 PE=1 SV=4;>sp|P35251-2|RFC1_HUMAN Isoform 2 of Replication factor C subunit 1 OS=Homo sapiens GN=RFC1;>tr|H0Y8U4|H0Y8U4_HUMAN Replication factor C subunit 1 (Fragment) OS=Homo sapiens GN=RFC1 PE=2 SV=1	0	0	0	552720	0	159250	0	0	0	325850	0	95023	0	0	0	0	0	1
>sp|P38935|SMBP2_HUMAN DNA-binding protein SMUBP-2 OS=Homo sapiens GN=IGHMBP2 PE=1 SV=3;>tr|F5GX64|F5GX64_HUMAN DNA-binding protein SMUBP-2 OS=Homo sapiens GN=IGHMBP2 PE=2 SV=1;>tr|H3BRR1|H3BRR1_HUMAN DNA-binding protein SMUBP-2 OS=Homo sapiens GN=IGHMBP2 PE=2 SV=1;>tr|F5H5K3|F5H5K3_HUMAN DNA-binding protein SMUBP-2 OS=Homo sapiens GN=IGHMBP2 PE=2 SV=1	0	0	0	0	2389200	1192200	0	0	0	0	1857500	1584800	0	0	0	0	1	0
>sp|P49674|KC1E_HUMAN Casein kinase I isoform epsilon OS=Homo sapiens GN=CSNK1E PE=1 SV=1;>tr|H0Y682|H0Y682_HUMAN Casein kinase I isoform epsilon (Fragment) OS=Homo sapiens GN=CSNK1E PE=4 SV=1;>tr|H0Y5S9|H0Y5S9_HUMAN Casein kinase I isoform epsilon (Fragment) OS=Homo sapiens GN=CSNK1E PE=4 SV=1	0	0	0	1911700	1655000	0	0	0	0	998130	838400	0	0	0	0	0	0	0
>tr|F6QR24|F6QR24_HUMAN Nuclear pore complex protein Nup153 OS=Homo sapiens GN=NUP153 PE=2 SV=1;>sp|P49790|NU153_HUMAN Nuclear pore complex protein Nup153 OS=Homo sapiens GN=NUP153 PE=1 SV=2	0	0	0	1223100	1057500	1076500	0	0	0	784930	928920	864200	0	0	0	1	0	0
>sp|P50416|CPT1A_HUMAN Carnitine O-palmitoyltransferase 1, liver isoform OS=Homo sapiens GN=CPT1A PE=1 SV=2;>sp|P50416-2|CPT1A_HUMAN Isoform 2 of Carnitine O-palmitoyltransferase 1, liver isoform OS=Homo sapiens GN=CPT1A	0	0	0	8278800	13933000	5307900	0	0	0	5344700	4436000	5118800	0	0	0	0	0	0
>sp|P50502|F10A1_HUMAN Hsc70-interacting protein OS=Homo sapiens GN=ST13 PE=1 SV=2;>sp|Q8IZP2|ST134_HUMAN Putative protein FAM10A4 OS=Homo sapiens GN=ST13P4 PE=5 SV=1;>tr|F6VDH7|F6VDH7_HUMAN Hsc70-interacting protein (Fragment) OS=Homo sapiens GN=ST13 PE=2 SV=1;>sp|Q8NFI4|F10A5_HUMAN Putative protein FAM10A5 OS=Homo sapiens GN=ST13P5 PE=5 SV=1;>tr|H7C3I1|H7C3I1_HUMAN Hsc70-interacting protein (Fr…	0	0	0	37491	2370700	0	0	0	0	976820	1634200	0	0	0	0	0	0	0
>sp|P52701|MSH6_HUMAN DNA mismatch repair protein Msh6 OS=Homo sapiens GN=MSH6 PE=1 SV=2;>tr|B4DF41|B4DF41_HUMAN DNA mismatch repair protein Msh6 OS=Homo sapiens GN=MSH6 PE=2 SV=1;>sp|P52701-2|MSH6_HUMAN Isoform GTBP-alt of DNA mismatch repair protein Msh6 OS=Homo sapiens GN=MSH6;>tr|F5H2F9|F5H2F9_HUMAN DNA mismatch repair protein Msh6 OS=Homo sapiens GN=MSH6 PE=2 SV=1	0	0	0	4916400	3062300	2290700	0	0	0	2602500	1683500	1921300	0	0	0	1	1	1
>sp|P52907|CAZA1_HUMAN F-actin-capping protein subunit alpha-1 OS=Homo sapiens GN=CAPZA1 PE=1 SV=3	0	0	0	4966000	1975400	5367400	0	0	0	2824100	1479100	2472700	0	0	0	0	0	1
>sp|P61626|LYSC_HUMAN Lysozyme C OS=Homo sapiens GN=LYZ PE=1 SV=1;>tr|F8VV32|F8VV32_HUMAN Lysozyme C OS=Homo sapiens GN=LYZ PE=2 SV=1	0	0	0	411900	0	3406300	0	0	0	84329	0	2981200	0	0	0	0	0	1
>sp|Q00013|EM55_HUMAN 55 kDa erythrocyte membrane protein OS=Homo sapiens GN=MPP1 PE=1 SV=2;>sp|Q00013-3|EM55_HUMAN Isoform 3 of 55 kDa erythrocyte membrane protein OS=Homo sapiens GN=MPP1;>sp|Q00013-2|EM55_HUMAN Isoform 2 of 55 kDa erythrocyte membrane protein OS=Homo sapiens GN=MPP1	0	0	0	762110	7552700	0	0	0	0	1259300	4157500	0	0	0	0	0	0	0
>sp|Q01844-5|EWS_HUMAN Isoform 5 of RNA-binding protein EWS OS=Homo sapiens GN=EWSR1;>sp|Q01844|EWS_HUMAN RNA-binding protein EWS OS=Homo sapiens GN=EWSR1 PE=1 SV=1;>sp|Q01844-3|EWS_HUMAN Isoform 3 of RNA-binding protein EWS OS=Homo sapiens GN=EWSR1;>tr|B0QYK0|B0QYK0_HUMAN RNA-binding protein EWS OS=Homo sapiens GN=EWSR1 PE=2 SV=1;>sp|Q01844-6|EWS_HUMAN Isoform 6 of RNA-binding protein EWS OS=Hom…	0	0	0	0	16149000	10154000	0	0	0	0	9164300	7896900	0	0	0	0	0	1
>sp|Q03164-3|KMT2A_HUMAN Isoform 3 of Histone-lysine N-methyltransferase 2A OS=Homo sapiens GN=KMT2A;>sp|Q03164|KMT2A_HUMAN Histone-lysine N-methyltransferase 2A OS=Homo sapiens GN=KMT2A PE=1 SV=5;>sp|Q03164-2|KMT2A_HUMAN Isoform 2 of Histone-lysine N-methyltransferase 2A OS=Homo sapiens GN=KMT2A	0	0	0	497720	0	1035500	0	0	0	329750	0	617890	0	0	0	0	0	1
>tr|J3QQ67|J3QQ67_HUMAN 60S ribosomal protein L18 (Fragment) OS=Homo sapiens GN=RPL18 PE=3 SV=1;>sp|Q07020|RL18_HUMAN 60S ribosomal protein L18 OS=Homo sapiens GN=RPL18 PE=1 SV=2;>tr|H0YHA7|H0YHA7_HUMAN 60S ribosomal protein L18 (Fragment) OS=Homo sapiens GN=RPL18 PE=3 SV=1;>tr|G3V203|G3V203_HUMAN 60S ribosomal protein L18 OS=Homo sapiens GN=RPL18 PE=2 SV=1;>tr|F8VWC5|F8VWC5_HUMAN 60S ribosomal p…	0	0	0	3518100	0	8213400	0	0	0	661080	0	2705200	0	0	0	0	0	1
>sp|Q12866|MERTK_HUMAN Tyrosine-protein kinase Mer OS=Homo sapiens GN=MERTK PE=1 SV=2;>tr|E9PHX8|E9PHX8_HUMAN Tyrosine-protein kinase Mer OS=Homo sapiens GN=MERTK PE=2 SV=1	0	0	0	21826000	11124000	0	0	0	0	11618000	8536200	0	0	0	0	0	0	0
>sp|Q13409|DC1I2_HUMAN Cytoplasmic dynein 1 intermediate chain 2 OS=Homo sapiens GN=DYNC1I2 PE=1 SV=3;>tr|F8W8S0|F8W8S0_HUMAN Cytoplasmic dynein 1 intermediate chain 2 OS=Homo sapiens GN=DYNC1I2 PE=2 SV=1;>sp|Q13409-5|DC1I2_HUMAN Isoform 2E of Cytoplasmic dynein 1 intermediate chain 2 OS=Homo sapiens GN=DYNC1I2;>sp|Q13409-2|DC1I2_HUMAN Isoform 2B of Cytoplasmic dynein 1 intermediate chain 2 OS=Ho…	0	0	0	753200	0	545530	0	0	0	650780	0	594100	0	0	0	0	0	0
>sp|Q13576|IQGA2_HUMAN Ras GTPase-activating-like protein IQGAP2 OS=Homo sapiens GN=IQGAP2 PE=1 SV=4;>tr|E7EWC2|E7EWC2_HUMAN Ras GTPase-activating-like protein IQGAP2 (Fragment) OS=Homo sapiens GN=IQGAP2 PE=2 SV=1;>tr|F5H7S7|F5H7S7_HUMAN Ras GTPase-activating-like protein IQGAP2 OS=Homo sapiens GN=IQGAP2 PE=2 SV=1;>sp|Q13576-2|IQGA2_HUMAN Isoform 2 of Ras GTPase-activating-like protein IQGAP2 OS=…	0	0	0	13705000	7156000	19252000	0	0	0	9631900	7163400	10834000	0	0	0	0	0	0
>sp|Q14244|MAP7_HUMAN Ensconsin OS=Homo sapiens GN=MAP7 PE=1 SV=1;>sp|Q14244-2|MAP7_HUMAN Isoform 2 of Ensconsin OS=Homo sapiens GN=MAP7;>sp|Q14244-3|MAP7_HUMAN Isoform 3 of Ensconsin OS=Homo sapiens GN=MAP7;>sp|Q14244-7|MAP7_HUMAN Isoform 7 of Ensconsin OS=Homo sapiens GN=MAP7;>sp|Q14244-4|MAP7_HUMAN Isoform 4 of Ensconsin OS=Homo sapiens GN=MAP7;>sp|Q14244-5|MAP7_HUMAN Isoform 5 of Ensconsin OS…	0	0	0	794640	2911400	0	0	0	0	982120	2324800	0	0	0	0	0	0	0
>sp|Q14692|BMS1_HUMAN Ribosome biogenesis protein BMS1 homolog OS=Homo sapiens GN=BMS1 PE=1 SV=1	0	0	0	7059900	3801000	6204000	0	0	0	5608100	4894200	3532300	0	0	0	3	1	1
>sp|Q14739|LBR_HUMAN Lamin-B receptor OS=Homo sapiens GN=LBR PE=1 SV=2;>tr|C9JXK0|C9JXK0_HUMAN Lamin-B receptor (Fragment) OS=Homo sapiens GN=LBR PE=2 SV=1	0	0	0	0	2249900	5055200	0	0	0	0	4213600	2773400	0	0	0	0	0	0
>sp|Q14999-2|CUL7_HUMAN Isoform 2 of Cullin-7 OS=Homo sapiens GN=CUL7;>sp|Q14999|CUL7_HUMAN Cullin-7 OS=Homo sapiens GN=CUL7 PE=1 SV=2	0	0	0	1411300	519830	2650400	0	0	0	5113500	3194100	266390	0	0	0	0	0	1
>sp|Q53GQ0|DHB12_HUMAN Estradiol 17-beta-dehydrogenase 12 OS=Homo sapiens GN=HSD17B12 PE=1 SV=2	0	0	0	4319000	3142300	0	0	0	0	2859400	891110	0	0	0	0	0	1	0
>sp|Q5T1M5|FKB15_HUMAN FK506-binding protein 15 OS=Homo sapiens GN=FKBP15 PE=1 SV=2;>sp|Q5T1M5-2|FKB15_HUMAN Isoform 2 of FK506-binding protein 15 OS=Homo sapiens GN=FKBP15	0	0	0	1821700	955180	0	0	0	0	1908700	1940000	0	0	0	0	0	0	0
>sp|Q658Y4|F91A1_HUMAN Protein FAM91A1 OS=Homo sapiens GN=FAM91A1 PE=1 SV=3;>tr|E7ER68|E7ER68_HUMAN Protein FAM91A1 OS=Homo sapiens GN=FAM91A1 PE=2 SV=1	0	0	0	308810	0	184670	0	0	0	233490	0	181980	0	0	0	0	0	0
>tr|F8W1S1|F8W1S1_HUMAN Keratin, type II cytoskeletal 74 OS=Homo sapiens GN=KRT74 PE=2 SV=1;>sp|Q86Y46|K2C73_HUMAN Keratin, type II cytoskeletal 73 OS=Homo sapiens GN=KRT73 PE=1 SV=1;CON__Q32MB2;>sp|Q7RTS7|K2C74_HUMAN Keratin, type II cytoskeletal 74 OS=Homo sapiens GN=KRT74 PE=1 SV=2;CON__Q7RTS7	0	0	0	12079000	22901000	15079000	0	0	0	8002600	16072000	8997100	0	0	0	0	1	1
CON__Q7RTT2;CON__Q8N1N4-2;>sp|Q8N1N4|K2C78_HUMAN Keratin, type II cytoskeletal 78 OS=Homo sapiens GN=KRT78 PE=2 SV=2;>sp|Q8N1N4-2|K2C78_HUMAN Isoform 2 of Keratin, type II cytoskeletal 78 OS=Homo sapiens GN=KRT78	0	0	0	0	1241600	371340	0	0	0	0	810810	408860	0	0	0	0	1	0
>sp|Q8NC96|NECP1_HUMAN Adaptin ear-binding coat-associated protein 1 OS=Homo sapiens GN=NECAP1 PE=1 SV=2;>sp|Q9NVZ3-2|NECP2_HUMAN Isoform 2 of Adaptin ear-binding coat-associated protein 2 OS=Homo sapiens GN=NECAP2;>sp|Q9NVZ3|NECP2_HUMAN Adaptin ear-binding coat-associated protein 2 OS=Homo sapiens GN=NECAP2 PE=1 SV=1;>sp|Q9NVZ3-4|NECP2_HUMAN Isoform 4 of Adaptin ear-binding coat-associated prote…	0	0	0	15598000	15085000	22656000	0	0	0	12055000	12201000	13787000	0	0	0	0	0	0
>sp|Q8NCA5|FA98A_HUMAN Protein FAM98A OS=Homo sapiens GN=FAM98A PE=1 SV=1;>sp|Q8NCA5-2|FA98A_HUMAN Isoform 2 of Protein FAM98A OS=Homo sapiens GN=FAM98A;>tr|B4DT23|B4DT23_HUMAN Protein FAM98A OS=Homo sapiens GN=FAM98A PE=2 SV=1;>tr|E9PH82|E9PH82_HUMAN Protein FAM98A OS=Homo sapiens GN=FAM98A PE=2 SV=1	0	0	0	7192100	0	3110300	0	0	0	2134600	0	2541600	0	0	0	2	0	1
>sp|Q92621|NU205_HUMAN Nuclear pore complex protein Nup205 OS=Homo sapiens GN=NUP205 PE=1 SV=3	0	0	0	944380	0	1134700	0	0	0	812350	0	879080	0	0	0	1	0	0
>sp|Q96Q42|ALS2_HUMAN Alsin OS=Homo sapiens GN=ALS2 PE=1 SV=2	0	0	0	357560000	317210000	425290000	0	0	0	268220000	166010000	227600000	0	0	0	4	6	8
>sp|Q9HAY2|MAGF1_HUMAN Melanoma-associated antigen F1 OS=Homo sapiens GN=MAGEF1 PE=1 SV=2	0	0	0	122680000	807900000	1030300000	0	0	0	281520000	801160000	975620000	0	0	0	0	0	0
>sp|Q9NRL2|BAZ1A_HUMAN Bromodomain adjacent to zinc finger domain protein 1A OS=Homo sapiens GN=BAZ1A PE=1 SV=2;>sp|Q9NRL2-2|BAZ1A_HUMAN Isoform 2 of Bromodomain adjacent to zinc finger domain protein 1A OS=Homo sapiens GN=BAZ1A	0	0	0	780950	380610	0	0	0	0	517400	267110	0	0	0	0	0	1	0
>sp|Q9NRN7|ADPPT_HUMAN L-aminoadipate-semialdehyde dehydrogenase-phosphopantetheinyl transferase OS=Homo sapiens GN=AASDHPPT PE=1 SV=2	0	0	0	4081800	0	3326400	0	0	0	1156600	0	819380	0	0	0	0	0	1
>tr|B0QY89|B0QY89_HUMAN Eukaryotic translation initiation factor 3 subunit L OS=Homo sapiens GN=EIF3L PE=2 SV=1;>sp|Q9Y262|EIF3L_HUMAN Eukaryotic translation initiation factor 3 subunit L OS=Homo sapiens GN=EIF3L PE=1 SV=1;>tr|B0QY90|B0QY90_HUMAN Eukaryotic translation initiation factor 3 subunit L OS=Homo sapiens GN=EIF3L PE=2 SV=1;>sp|Q9Y262-2|EIF3L_HUMAN Isoform 2 of Eukaryotic translation ini…	0	0	0	1046000	998640	953990	0	0	0	396350	405890	387970	0	0	0	0	0	0
>sp|Q9Y676|RT18B_HUMAN 28S ribosomal protein S18b, mitochondrial OS=Homo sapiens GN=MRPS18B PE=1 SV=1;>tr|B4DFG6|B4DFG6_HUMAN 28S ribosomal protein S18b, mitochondrial OS=Homo sapiens GN=MRPS18B PE=2 SV=1	0	0	0	1040000	0	2748800	0	0	0	786960	0	746490	0	0	0	0	0	0
>tr|I3L4V6|I3L4V6_HUMAN Nucleoredoxin (Fragment) OS=Homo sapiens GN=NXN PE=4 SV=1;>tr|B4DNN6|B4DNN6_HUMAN Nucleoredoxin OS=Homo sapiens GN=NXN PE=2 SV=1	0	0	0	15330000	19746000	10712000	0	0	0	11392000	13307000	9037100	0	0	0	0	0	0
>tr|H3BUC4|H3BUC4_HUMAN E3 ubiquitin-protein ligase UBR1 (Fragment) OS=Homo sapiens GN=UBR1 PE=4 SV=1	0	0	0	0	1449000	1873700	0	0	0	0	1335200	1126300	0	0	0	0	0	1
CON__P34955	0	0	0	3415900	2236200	0	0	0	0	1527100	1098100	0	0	0	0	1	0	0

## Sheet: Table S3
Table S3. List of all identified phosphopeptides in NEK1 IP-LC-MS/MS from untreated cells.
Intensity FLAG-1	Intensity FLAG-2	Intensity FLAG-3	Intensity NEK-1	Intensity NEK-2	Intensity NEK-3	Reverse	Contaminant	Multiplicity	Localization prob FLAG-1	Localization prob FLAG-2	Localization prob FLAG-3	Localization prob NEK-1	Localization prob NEK-2	Localization prob NEK-3	Proteins	Positions within proteins	Sequence window	Localization prob	Score diff	Number of Phospho (STY)	Amino acid	Modification window	Peptide window coverage	PEP	Score	Score for localization	Modified sequence	Phospho (STY) Probabilities	Phospho (STY) Score diffs	Position in peptide	Charge	m/z	Mass error [ppm]	id	Protein group IDs	Positions	Position	Peptide IDs	Mod. peptide IDs	Evidence IDs	MS/MS IDs	Best localization evidence ID	Best localization MS/MS ID	Best localization scan number	Best score evidence ID	Best score MS/MS ID	Best score scan number	Best PEP evidence ID	Best PEP MS/MS ID
FLAG-	FLAG-	FLAG-	NEK-	NEK-	NEK-
NaN	NaN	NaN	21.5809	NaN	NaN			___1	NaN	NaN	NaN	0.999973	0	0	>sp|Q8TCG1|CIP2A_HUMAN Protein CIP2A OS=Homo sapiens GN=KIAA1524 PE=1 SV=2;>sp|Q8TCG1-2|CIP2A_HUMAN Isoform 2 of Protein CIP2A OS=Homo sapiens GN=KIAA1524	882;723	KESLVKLQQEELNKHSHMIAMIHSLSGGKIN	0.999973	45.9226	1	S	X;X;X;X;X;X;X;X;X;X;X;X;X;X;X;Phospho (STY);X;X;X;X;X;X;X;X;X;X;X;X;X;X;X	XXXXXXXXXXXXXXPPPPPPPPPPPPPPPXX	0.0221785	85.457	80.96	_HS(ph)HMIAMIHSLSGGK_	HS(1)HMIAMIHSLSGGK	HS(45.92)HMIAMIHS(-45.92)LS(-57.13)GGK	2	2	843.386	-0.83457	184	856	882	882	1852	1956	25546;25547	10221;10222	25546	10221	10614	25547	10222	10279	25547	10222
NaN	NaN	NaN	29.8258	29.8672	27.9828			___1	NaN	NaN	NaN	0.98666	0.999892	0	>sp|Q96PY6|NEK1_HUMAN Serine/threonine-protein kinase Nek1 OS=Homo sapiens GN=NEK1 PE=1 SV=2;>sp|Q96PY6-3|NEK1_HUMAN Isoform 3 of Serine/threonine-protein kinase Nek1 OS=Homo sapiens GN=NEK1;>sp|Q96PY6-2|NEK1_HUMAN Isoform 2 of Serine/threonine-protein kinase Nek1 OS=Homo sapiens GN=NEK1;>sp|Q96PY6-6|NEK1_HUMAN Isoform 6 of Serine/threonine-protein kinase Nek1 OS=Homo sapiens GN=NEK1;>sp|Q96PY6-4…	428;428;428;428;403;428	LSAGGSGEVKAPFLGSGGTIAPSSFSSRGQY	0.999892	39.6642	1	S	X;Phospho (STY);X;X;X;Phospho (STY);X;X;X;X;X;X;X;X;X;Phospho (STY);X;X;X;X;X;X;X;X;X;X;X;X;X;X;X	XXXXXXXXXXPPPPPPPPPPPPPPPPPPXXX	1.92772e-91	195.53	195.53	_APFLGS(ph)GGTIAPSSFSSR_	APFLGS(1)GGTIAPSSFSSR	APFLGS(39.66)GGT(-39.66)IAPS(-120.3)S(-131.82)FS(-131.82)S(-131.82)R	6	2	909.925	-0.64796	204	926	428	428	351	371	4909;4910;4911;4912;4913;4914;4915;4916	1943;1944;1945;1946	4910	1944	7606	4910	1944	7606	4910	1944
NaN	NaN	NaN	27.483	26.0308	25.7104			___1	NaN	NaN	NaN	0.721821	0.989551	0	>sp|Q96PY6|NEK1_HUMAN Serine/threonine-protein kinase Nek1 OS=Homo sapiens GN=NEK1 PE=1 SV=2;>sp|Q96PY6-3|NEK1_HUMAN Isoform 3 of Serine/threonine-protein kinase Nek1 OS=Homo sapiens GN=NEK1;>sp|Q96PY6-2|NEK1_HUMAN Isoform 2 of Serine/threonine-protein kinase Nek1 OS=Homo sapiens GN=NEK1;>sp|Q96PY6-6|NEK1_HUMAN Isoform 6 of Serine/threonine-protein kinase Nek1 OS=Homo sapiens GN=NEK1;>sp|Q96PY6-4…	806;834;762;790;737	IKLGPNGSPRRAWGKSPTDSVLKILGEAELQ	0.999455	32.639	1	S	X;X;X;X;X;X;X;X;X;X;X;X;X;X;X;Phospho (STY);X;X;X;X;X;X;X;X;X;X;X;X;X;X;X	XXXXXXXXXXPPPPPPPPPPPPPXXXXXXXX	8.09127e-08	163.99	163.99	_AWGKS(ph)PTDSVLK_	AWGKS(0.999)PT(0.001)DSVLK	AWGKS(32.64)PT(-32.64)DS(-62.67)VLK	5	2	684.832	1.0072	205	926	806	806	509;3736	537;3995	6976;6977;6978;6979;6980;6981;6982;48896;48897;48898	2477;2478;2479;2480;17313	6977	2478	4368	6977	2478	4368	6977	2478
NaN	NaN	NaN	25.6815	25.789	21.1403			___1	NaN	NaN	NaN	0.935812	0.838657	0.85946	>sp|Q96PY6|NEK1_HUMAN Serine/threonine-protein kinase Nek1 OS=Homo sapiens GN=NEK1 PE=1 SV=2;>sp|Q96PY6-3|NEK1_HUMAN Isoform 3 of Serine/threonine-protein kinase Nek1 OS=Homo sapiens GN=NEK1;>sp|Q96PY6-2|NEK1_HUMAN Isoform 2 of Serine/threonine-protein kinase Nek1 OS=Homo sapiens GN=NEK1;>sp|Q96PY6-6|NEK1_HUMAN Isoform 6 of Serine/threonine-protein kinase Nek1 OS=Homo sapiens GN=NEK1;>sp|Q96PY6-4…	1092;1120;1048;1076;1023	LEIDEIEDENIKEGPSDSEDIVFEETDTDLQ	0.947775	12.5995	1	S	X;X;X;X;X;X;X;X;X;X;X;X;X;X;X;Phospho (STY);X;X;X;X;X;X;X;X;X;X;X;X;X;X;X	XXXXXXXXXXXXPPPPPPPPPPPPPPPPPPP	5.50072e-15	112.05	87.792	_EGPS(ph)DSEDIVFEETDTDLQELQASM(ox)EQLLR_	EGPS(0.948)DS(0.052)EDIVFEETDTDLQELQASMEQLLR	EGPS(12.6)DS(-12.6)EDIVFEET(-41.89)DT(-41.1)DLQELQAS(-71.69)MEQLLR	4	3	1174.18	-0.10879	206	926	1092	1092	923	980	11532;11533;11534;11535;11538;11539;11541;11543;11544;11546;11547;11550	3879;3880;3881;3882;3883;3884;3885;3886;3889;3890;3891;3894	11541	3894	11400	11539	3890	11702	11539	3890
NaN	NaN	NaN	21.0405	20.6999	NaN			___1	NaN	NaN	NaN	0	0.78111	0	>sp|Q96PY6|NEK1_HUMAN Serine/threonine-protein kinase Nek1 OS=Homo sapiens GN=NEK1 PE=1 SV=2;>sp|Q96PY6-3|NEK1_HUMAN Isoform 3 of Serine/threonine-protein kinase Nek1 OS=Homo sapiens GN=NEK1;>sp|Q96PY6-2|NEK1_HUMAN Isoform 2 of Serine/threonine-protein kinase Nek1 OS=Homo sapiens GN=NEK1;>sp|Q96PY6-6|NEK1_HUMAN Isoform 6 of Serine/threonine-protein kinase Nek1 OS=Homo sapiens GN=NEK1;>sp|Q96PY6-4…	1094;1122;1050;1078;1025	IDEIEDENIKEGPSDSEDIVFEETDTDLQEL	0.78111	5.58543	1	S	X;X;X;X;X;X;X;X;X;X;X;X;X;X;X;Phospho (STY);X;X;X;X;X;X;X;X;X;X;X;X;X;X;X	XXXXXXXXXXPPPPPPPPPPPPPPPPPPPPP	0.000104522	74.494	68.543	_EGPSDS(ph)EDIVFEETDTDLQELQASM(ox)EQLLR_	EGPS(0.216)DS(0.781)EDIVFEET(0.003)DT(0.001)DLQELQASMEQLLR	EGPS(-5.59)DS(5.59)EDIVFEET(-24.93)DT(-31.78)DLQELQAS(-55.18)MEQLLR	6	3	1174.18	-0.20829	207	926	1094	1094	923	980	11536;11537;11540;11542;11545;11548	3887;3888;3892;3893	11536	3887	15037	11540	3893	11628	11540	3893
NaN	NaN	NaN	21.5631	NaN	NaN			___1	NaN	NaN	NaN	0.991359	0	0	>sp|Q96PY6|NEK1_HUMAN Serine/threonine-protein kinase Nek1 OS=Homo sapiens GN=NEK1 PE=1 SV=2;>sp|Q96PY6-3|NEK1_HUMAN Isoform 3 of Serine/threonine-protein kinase Nek1 OS=Homo sapiens GN=NEK1;>sp|Q96PY6-2|NEK1_HUMAN Isoform 2 of Serine/threonine-protein kinase Nek1 OS=Homo sapiens GN=NEK1;>sp|Q96PY6-6|NEK1_HUMAN Isoform 6 of Serine/threonine-protein kinase Nek1 OS=Homo sapiens GN=NEK1;>sp|Q96PY6-4…	1112;1140;1068;1096;1043	IVFEETDTDLQELQASMEQLLREQPGEEYSE	0.991359	21.3727	1	S	X;X;X;X;X;X;X;X;X;X;X;X;X;X;X;Phospho (STY);Oxidation (M);X;X;X;X;X;X;X;X;X;X;X;Phospho (STY);Phospho (STY);X	PPPPPPPPPPPPPPPPPPPPPPXXXXXXXXX	0.000901532	67.33	67.33	_EGPSDSEDIVFEETDTDLQELQAS(ph)M(ox)EQLLR_	EGPSDSEDIVFEET(0.001)DT(0.007)DLQELQAS(0.991)MEQLLR	EGPS(-51.41)DS(-55.69)EDIVFEET(-28.49)DT(-21.37)DLQELQAS(21.37)MEQLLR	24	3	1174.18	0.5273	208	926	1112	1112	923	980	11531;11549	3878	11531	3878	10460	11531	3878	10460	11531	3878
NaN	NaN	NaN	26.0139	NaN	NaN			___1	NaN	NaN	NaN	0.872307	0	0	>sp|Q96PY6|NEK1_HUMAN Serine/threonine-protein kinase Nek1 OS=Homo sapiens GN=NEK1 PE=1 SV=2;>sp|Q96PY6-3|NEK1_HUMAN Isoform 3 of Serine/threonine-protein kinase Nek1 OS=Homo sapiens GN=NEK1;>sp|Q96PY6-2|NEK1_HUMAN Isoform 2 of Serine/threonine-protein kinase Nek1 OS=Homo sapiens GN=NEK1;>sp|Q96PY6-6|NEK1_HUMAN Isoform 6 of Serine/threonine-protein kinase Nek1 OS=Homo sapiens GN=NEK1;>sp|Q96PY6-4…	1126;1154;1082;1110;1057	ASMEQLLREQPGEEYSEEEESVLKNSDVEPT	0.872307	8.35903	1	S	X;Phospho (STY);Oxidation (M);X;X;X;X;X;X;X;X;X;X;X;X;Phospho (STY);X;X;X;X;X;X;X;X;X;X;X;X;X;X;X	XXXXXXXXPPPPPPPPPPPPPPPPXXXXXXX	0.0270414	78.088	78.088	_EQPGEEYS(ph)EEEESVLK_	EQPGEEY(0.127)S(0.872)EEEESVLK	EQPGEEY(-8.36)S(8.36)EEEES(-33.27)VLK	8	2	981.399	0.81432	209	926	1126	1126	1070	1137	13188	4452	13188	4452	6530	13188	4452	6530	13188	4452
NaN	NaN	NaN	30.4577	30.7187	30.2157			___1	NaN	NaN	NaN	0.490167	0.995079	0.959289	>sp|Q96PY6|NEK1_HUMAN Serine/threonine-protein kinase Nek1 OS=Homo sapiens GN=NEK1 PE=1 SV=2;>sp|Q96PY6-3|NEK1_HUMAN Isoform 3 of Serine/threonine-protein kinase Nek1 OS=Homo sapiens GN=NEK1;>sp|Q96PY6-2|NEK1_HUMAN Isoform 2 of Serine/threonine-protein kinase Nek1 OS=Homo sapiens GN=NEK1;>sp|Q96PY6-6|NEK1_HUMAN Isoform 6 of Serine/threonine-protein kinase Nek1 OS=Homo sapiens GN=NEK1;>sp|Q96PY6-4…	664;692;620;648;595	SSDVSPPLGQHETGGSPSKQQMRSVISVTSA	0.99943	32.4469	1;2	S	Phospho (STY);X;X;X;Phospho (STY);X;X;X;X;X;X;X;X;X;X;Phospho (STY);X;X;X;X;X;Oxidation (M);X;X;X;X;X;X;X;X;X	PPPPPPPPPPPPPPPPPPPPPPPXXXXXXXX	8.67772e-46	205.63	205.63	_SSDVSPPLGQHETGGS(ph)PSK_	SSDVSPPLGQHETGGS(0.999)PS(0.001)K	S(-141.76)S(-141.76)DVS(-101.45)PPLGQHET(-60.68)GGS(32.45)PS(-32.45)K	16	2	973.928	0.41675	212	926	664	664	1715;4116;4117	1812;4409;4410;4411	23223;54138;54139;54140;54141;54142;54143;54144;54145;54146;54147;54148;54150;54151	9432;18930;18931;18932;18933;18934;18935;18936;18937;18938;18939	54140	18933	3299	54140	18933	3299	54140	18933
NaN	NaN	NaN	20.9941	24.2204	NaN			___1	NaN	NaN	NaN	0.836377	0.629665	0	>sp|Q96PY6|NEK1_HUMAN Serine/threonine-protein kinase Nek1 OS=Homo sapiens GN=NEK1 PE=1 SV=2;>sp|Q96PY6-3|NEK1_HUMAN Isoform 3 of Serine/threonine-protein kinase Nek1 OS=Homo sapiens GN=NEK1;>sp|Q96PY6-2|NEK1_HUMAN Isoform 2 of Serine/threonine-protein kinase Nek1 OS=Homo sapiens GN=NEK1;>sp|Q96PY6-6|NEK1_HUMAN Isoform 6 of Serine/threonine-protein kinase Nek1 OS=Homo sapiens GN=NEK1;>sp|Q96PY6-4…	863;891;819;847;794	TGEKKVQCISHEINPSAIVDSPVETKSPEFS	0.836377	7.49068	1	S	X;X;X;X;X;X;X;X;X;X;X;X;X;X;X;Phospho (STY);X;X;X;X;X;X;X;X;X;X;Phospho (STY);X;X;X;X	XXXXPPPPPPPPPPPPPPPPPPPPPPXXXXX	1.76878e-50	206.08	206.08	_VQCISHEINPS(ph)AIVDSPVETK_	VQCIS(0.149)HEINPS(0.836)AIVDS(0.015)PVETK	VQCIS(-7.49)HEINPS(7.49)AIVDS(-17.59)PVET(-62.61)K	11	2	1202.07	-0.7139	214	926	863	863	2395;2396;4900;4901	2529;2530;5241;5243	32196;32197;63524;63539	12373;12374;21851	63524	21851	6789	63524	21851	6789	63524	21851
NaN	NaN	NaN	28.1763	27.897	25.2986			___1	NaN	NaN	NaN	0.999339	0.995449	0.984803	>sp|Q96PY6|NEK1_HUMAN Serine/threonine-protein kinase Nek1 OS=Homo sapiens GN=NEK1 PE=1 SV=2;>sp|Q96PY6-3|NEK1_HUMAN Isoform 3 of Serine/threonine-protein kinase Nek1 OS=Homo sapiens GN=NEK1;>sp|Q96PY6-2|NEK1_HUMAN Isoform 2 of Serine/threonine-protein kinase Nek1 OS=Homo sapiens GN=NEK1;>sp|Q96PY6-6|NEK1_HUMAN Isoform 6 of Serine/threonine-protein kinase Nek1 OS=Homo sapiens GN=NEK1;>sp|Q96PY6-4…	868;896;824;852;799	VQCISHEINPSAIVDSPVETKSPEFSEASPQ	0.999998	57.4832	1	S	X;X;X;X;X;X;X;X;X;X;X;X;X;X;X;Phospho (STY);X;X;X;X;X;Phospho (STY);X;X;X;X;X;X;Phospho (STY);X;X	PPPPPPPPPPPPPPPPPPPPPXXXXXXXXXX	4.84682e-59	209.62	209.62	_VQCISHEINPSAIVDS(ph)PVETK_	VQCISHEINPSAIVDS(1)PVETK	VQCIS(-171.05)HEINPS(-85.76)AIVDS(57.48)PVET(-57.48)K	16	2	1202.07	-0.27641	215	926	868	868	2395;2396;4900;4901	2529;2530;5241;5243	32194;32195;32198;32199;32200;32201;32202;32203;32204;32205;32206;32207;32208;32209;32210;32211;32212;63523;63525;63526;63527;63528;63529;63530;63531;63532;63533;63534;63535;63536;63537;63538;63540;63541;63542;63543;63544;63545	12371;12372;12375;12376;12377;12378;12379;21849;21850;21852;21853;21854;21855;21856;21857;21858;21859;21860;21861;21862;21863;21864;21865	63533	21862	5974	63533	21862	5974	63533	21862
NaN	NaN	NaN	29.9716	24.0033	29.0259			___1	NaN	NaN	NaN	1	0.999834	0.999933	>sp|Q96PY6|NEK1_HUMAN Serine/threonine-protein kinase Nek1 OS=Homo sapiens GN=NEK1 PE=1 SV=2;>sp|Q96PY6-3|NEK1_HUMAN Isoform 3 of Serine/threonine-protein kinase Nek1 OS=Homo sapiens GN=NEK1;>sp|Q96PY6-2|NEK1_HUMAN Isoform 2 of Serine/threonine-protein kinase Nek1 OS=Homo sapiens GN=NEK1;>sp|Q96PY6-6|NEK1_HUMAN Isoform 6 of Serine/threonine-protein kinase Nek1 OS=Homo sapiens GN=NEK1;>sp|Q96PY6-4…	874;902;830;858;805	EINPSAIVDSPVETKSPEFSEASPQMSLKLE	1	69.531	1;2	S	X;X;X;X;Phospho (STY);X;X;X;X;Phospho (STY);X;X;X;X;X;Phospho (STY);X;X;X;X;X;X;Phospho (STY);X;X;Oxidation (M);X;X;X;X;X	PPPPPPPPPPPPPPPPPPPPPPPPPPPPPXX	3.24587e-14	159.13	152.94	_S(ph)PEFSEASPQM(ox)SLK_	S(1)PEFSEASPQMSLK	S(69.53)PEFS(-69.53)EAS(-88.66)PQMS(-114.71)LK	1	2	817.344	-0.77553	216	926	874	874	2396;4068;4901	2530;4358;4359;5243	32214;32216;32217;32218;32219;53533;53535;53538;53540;53542;53543;53544;53545;53546;53547	12381;18693;18694;18696;18697;18698;18701;18703;18704;18705	53533	18694	4846	53535	18697	4830	32213	12380
NaN	NaN	NaN	NaN	29.9297	19.5189			___1	NaN	NaN	NaN	0.984972	0.994057	0.965895	>sp|Q96PY6|NEK1_HUMAN Serine/threonine-protein kinase Nek1 OS=Homo sapiens GN=NEK1 PE=1 SV=2;>sp|Q96PY6-3|NEK1_HUMAN Isoform 3 of Serine/threonine-protein kinase Nek1 OS=Homo sapiens GN=NEK1;>sp|Q96PY6-2|NEK1_HUMAN Isoform 2 of Serine/threonine-protein kinase Nek1 OS=Homo sapiens GN=NEK1;>sp|Q96PY6-6|NEK1_HUMAN Isoform 6 of Serine/threonine-protein kinase Nek1 OS=Homo sapiens GN=NEK1;>sp|Q96PY6-4…	881;909;837;865;812	VDSPVETKSPEFSEASPQMSLKLEGNLEEPD	0.999767	39.5618	1;2	S	X;X;Phospho (STY);X;X;X;X;X;Phospho (STY);X;X;X;X;X;X;Phospho (STY);X;X;Oxidation (M);X;X;X;X;X;X;X;X;X;X;X;X	XXXXXXXXPPPPPPPPPPPPPPXXXXXXXXX	8.44277e-05	129.05	119.08	_SPEFSEAS(ph)PQM(ox)SLK_	SPEFSEAS(1)PQMSLK	S(-45.91)PEFS(-39.56)EAS(39.56)PQMS(-40.13)LK	8	2	817.344	0.11418	218	926	881	881	2396;4068;4901	2530;4358;4359;5243	53534;53536;53537;53539;53541;53542;53543;53544;53545;53546;53547	18695;18699;18700;18702;18703;18704;18705	53537	18700	4560	53534	18695	4562	53544	18705
NaN	NaN	NaN	31.0987	30.7868	30.1131			___1	NaN	NaN	NaN	0.999999	0	0	>sp|Q96PY6|NEK1_HUMAN Serine/threonine-protein kinase Nek1 OS=Homo sapiens GN=NEK1 PE=1 SV=2;>sp|Q96PY6-3|NEK1_HUMAN Isoform 3 of Serine/threonine-protein kinase Nek1 OS=Homo sapiens GN=NEK1;>sp|Q96PY6-2|NEK1_HUMAN Isoform 2 of Serine/threonine-protein kinase Nek1 OS=Homo sapiens GN=NEK1;>sp|Q96PY6-6|NEK1_HUMAN Isoform 6 of Serine/threonine-protein kinase Nek1 OS=Homo sapiens GN=NEK1;>sp|Q96PY6-4…	1052;1080;1008;1036;983	TGLFDANNPKMLRTCSLPDLSKLFRTLMDVP	0.999999	62.1624	1;2	S	X;X;X;X;X;X;X;X;X;X;Oxidation (M);X;X;Phospho (STY);X;Phospho (STY);X;X;X;X;X;X;X;X;X;X;X;Oxidation (M);X;X;X	XXXXXXXXXXPPPPPPPPPPPPXXXXXXXXX	0.00887511	125.97	104.26	_M(ox)LRT(ph)CS(ph)LPDLSK_	MLRT(1)CS(1)LPDLSK	MLRT(83.87)CS(62.16)LPDLS(-62.16)K	6	2	798.832	0.31793	219	926	1052	1052	3168;4275	3379;4574	42172;55905;55906;55907;55908;55909;55910;55911;55912;55913	15246;19497;19498	42172	15246	5303	55905	19497	4602	55905	19497
NaN	NaN	NaN	24.8591	24.7748	24.4355			___1	NaN	NaN	NaN	1	0.999653	1	>sp|Q96PY6|NEK1_HUMAN Serine/threonine-protein kinase Nek1 OS=Homo sapiens GN=NEK1 PE=1 SV=2;>sp|Q96PY6-3|NEK1_HUMAN Isoform 3 of Serine/threonine-protein kinase Nek1 OS=Homo sapiens GN=NEK1;>sp|Q96PY6-2|NEK1_HUMAN Isoform 2 of Serine/threonine-protein kinase Nek1 OS=Homo sapiens GN=NEK1;>sp|Q96PY6-6|NEK1_HUMAN Isoform 6 of Serine/threonine-protein kinase Nek1 OS=Homo sapiens GN=NEK1;>sp|Q96PY6-4…	1030;1058;986;1014;961	FRSHSHLPPKNKNKNSLLIGLSTGLFDANNP	1	117.01	1	S	X;X;X;X;X;X;X;X;X;X;X;X;X;X;X;Phospho (STY);X;X;X;X;X;X;X;X;X;X;X;X;X;X;X	XXXXXXXXXXXXPPPPPPPPPPPPPPPPPPP	3.72413e-92	238.63	212.94	_NKNS(ph)LLIGLSTGLFDANNPK_	NKNS(1)LLIGLSTGLFDANNPK	NKNS(117.01)LLIGLS(-117.01)T(-117.01)GLFDANNPK	4	2	1098.56	-0.62766	220	926	1030	1030	3398	3637	44576;44577;44578;44579;44580;44581;44582;44583;44584;44585;44586;44587	15892;15893;15894;15895;15896;15897;15898;15899	44583	15899	8979	44576	15892	9194	44576	15892
NaN	NaN	NaN	26.4312	29.459	26.0341			___1	NaN	NaN	NaN	1	0.999998	0.999997	>sp|Q96PY6|NEK1_HUMAN Serine/threonine-protein kinase Nek1 OS=Homo sapiens GN=NEK1 PE=1 SV=2;>sp|Q96PY6-3|NEK1_HUMAN Isoform 3 of Serine/threonine-protein kinase Nek1 OS=Homo sapiens GN=NEK1;>sp|Q96PY6-2|NEK1_HUMAN Isoform 2 of Serine/threonine-protein kinase Nek1 OS=Homo sapiens GN=NEK1;>sp|Q96PY6-6|NEK1_HUMAN Isoform 6 of Serine/threonine-protein kinase Nek1 OS=Homo sapiens GN=NEK1;>sp|Q96PY6-5…	418;418;418;418;418	RAREQGWRNVLSAGGSGEVKAPFLGSGGTIA	1	68.6735	1	S	X;X;X;X;X;X;X;X;X;X;X;X;X;X;X;Phospho (STY);X;X;X;X;X;X;X;X;X;Phospho (STY);X;X;X;X;X	XXXXXXXXPPPPPPPPPPPPXXXXXXXXXXX	1.85399e-06	157.58	127.56	_NVLSAGGS(ph)GEVK_	NVLSAGGS(1)GEVK	NVLS(-68.67)AGGS(68.67)GEVK	8	2	599.279	-1.0899	222	926	418	418	3526	3777	46453;46454;46455;46456;46457;46458;46459;46460;46461;46462;46463;46464;46465;46466;46467;46468;46469;46470;46471;46472;46473;46474;46475;46476;46477;46478;46479;46480;46481;46482;46483;46484;46485;46486;46487;46488;46489	16618;16619;16620;16621;16622;16623;16624;16625;16626;16627;16628;16629;16630;16631;16632;16633;16634	46457	16622	13137	46467	16632	14053	46463	16628
NaN	NaN	NaN	22.8109	23.896	23.482			___1	NaN	NaN	NaN	0.845429	0	0	>sp|Q96PY6|NEK1_HUMAN Serine/threonine-protein kinase Nek1 OS=Homo sapiens GN=NEK1 PE=1 SV=2;>sp|Q96PY6-3|NEK1_HUMAN Isoform 3 of Serine/threonine-protein kinase Nek1 OS=Homo sapiens GN=NEK1;>sp|Q96PY6-2|NEK1_HUMAN Isoform 2 of Serine/threonine-protein kinase Nek1 OS=Homo sapiens GN=NEK1;>sp|Q96PY6-6|NEK1_HUMAN Isoform 6 of Serine/threonine-protein kinase Nek1 OS=Homo sapiens GN=NEK1;>sp|Q96PY6-4…	295;295;295;295;295;295;77	FSKFGSQPIPAKRPASGQNSISVMPAQKITK	0.845429	8.54132	1	S	X;X;X;X;X;X;X;X;X;X;X;X;X;X;X;Phospho (STY);X;X;X;X;X;X;X;Oxidation (M);X;X;X;X;X;X;X	XXXXXXXXXXXXPPPPPPPPPPPPPPPPXXX	0.0295989	84.66	84.66	_RPAS(ph)GQNSISVM(ox)PAQK_	RPAS(0.845)GQNS(0.118)IS(0.036)VMPAQK	RPAS(8.54)GQNS(-8.54)IS(-13.67)VMPAQK	4	2	883.916	-0.85068	223	926;1243	295;77	295	3779	4044	49375;49376;49377;49378;49379	17445	49375	17445	3284	49375	17445	3284	49375	17445
NaN	NaN	NaN	25.1294	25.4589	21.4553			___1	NaN	NaN	NaN	0.996645	0	0	>sp|Q96PY6|NEK1_HUMAN Serine/threonine-protein kinase Nek1 OS=Homo sapiens GN=NEK1 PE=1 SV=2;>sp|Q96PY6-3|NEK1_HUMAN Isoform 3 of Serine/threonine-protein kinase Nek1 OS=Homo sapiens GN=NEK1;>sp|Q96PY6-2|NEK1_HUMAN Isoform 2 of Serine/threonine-protein kinase Nek1 OS=Homo sapiens GN=NEK1;>sp|Q96PY6-6|NEK1_HUMAN Isoform 6 of Serine/threonine-protein kinase Nek1 OS=Homo sapiens GN=NEK1;>sp|Q96PY6-4…	1008;1036;964;992;939	SEHLNLVPQVQSVQCSPEESFAFRSHSHLPP	0.996645	24.9719	1	S	X;X;X;X;X;X;X;X;X;X;X;X;X;X;X;Phospho (STY);X;X;X;X;X;X;X;X;X;X;X;X;X;X;X	PPPPPPPPPPPPPPPPPPPPPPPPXXXXXXX	0.00194328	83.317	83.317	_VVHSEHLNLVPQVQSVQCS(ph)PEESFAFR_	VVHSEHLNLVPQVQSVQCS(0.997)PEES(0.003)FAFR	VVHS(-63.66)EHLNLVPQVQS(-37.38)VQCS(24.97)PEES(-24.97)FAFR	19	3	1068.5	-0.16311	226	926	1008	1008	4978	5328	64546;64547;64548;64549;64550	22181;22182	64546	22181	7590	64546	22181	7590	64546	22181
NaN	NaN	NaN	NaN	22.1304	NaN			___1	NaN	NaN	NaN	0	1	0	>sp|Q9BX70|BTBD2_HUMAN BTB/POZ domain-containing protein 2 OS=Homo sapiens GN=BTBD2 PE=1 SV=1;>tr|K7ENV9|K7ENV9_HUMAN BTB/POZ domain-containing protein 2 (Fragment) OS=Homo sapiens GN=BTBD2 PE=4 SV=1	239;151	MLLTQARLFDEPQLASLCLENIDKNTADAIT	1	99.7468	1	S	X;X;X;X;X;X;X;X;X;X;X;X;X;X;X;Phospho (STY);X;X;X;X;X;X;X;X;X;X;X;X;X;X;X	XXXXXXXPPPPPPPPPPPPPPPPPXXXXXXX	0.0193047	99.747	99.747	_LFDEPQLAS(ph)LCLENIDK_	LFDEPQLAS(1)LCLENIDK	LFDEPQLAS(99.75)LCLENIDK	9	2	1042.98	1.7942	237	971	239	239	2540	2688	35295	13346	35295	13346	5114	35295	13346	5114	35295	13346
NaN	NaN	NaN	NaN	22.442	NaN			___1	NaN	NaN	NaN	0	0.999666	0	>sp|Q9NY43|BARH2_HUMAN BarH-like 2 homeobox protein OS=Homo sapiens GN=BARHL2 PE=2 SV=2	175	YSTSVSSPHHTPKQESNAVHESFRPKLEQED	0.999666	34.7638	1	S	X;X;X;X;X;X;X;X;X;X;X;X;X;X;X;Phospho (STY);X;X;X;X;X;X;X;X;X;X;X;X;X;X;X	XXXXXXXXXXXXXPPPPPPPPPPPPPXXXXX	0.0163266	103.44	103.44	_QES(ph)NAVHESFRPK_	QES(1)NAVHESFRPK	QES(34.76)NAVHES(-34.76)FRPK	3	2	804.862	-1.468	265	1059	175	175	3629	3885	47512	16959	47512	16959	4063	47512	16959	4063	47512	16959
NaN	NaN	NaN	NaN	19.2921	NaN			___1	NaN	NaN	NaN	0	0.993131	0	>tr|F5GX24|F5GX24_HUMAN G2/M phase-specific E3 ubiquitin-protein ligase OS=Homo sapiens GN=G2E3 PE=2 SV=1;>tr|F8VQY7|F8VQY7_HUMAN G2/M phase-specific E3 ubiquitin-protein ligase OS=Homo sapiens GN=G2E3 PE=2 SV=1	3;3	_____________MSSGIWQRGKEEEGVYGF	0.993131	21.6013	1	S	X;X;X;X;X;X;X;X;X;X;X;X;X;X;X;Phospho (STY);X;X;X;X;X;X;X;X;X;X;X;X;X;X;X	XXXXXXXXXXXXXXPPPPPPPXXXXXXXXXX	0.0320593	124.89	124.89	_SS(ph)GIWQR_	S(0.007)S(0.993)GIWQR	S(-21.6)S(21.6)GIWQR	2	2	457.2	0.32105	342	1228	3	3	4128	4422	54245;54246	18977;18978	54246	18978	2089	54246	18978	2089	54246	18978
NaN	NaN	NaN	24.8699	NaN	NaN			___1	NaN	NaN	NaN	0.830448	0	0	>sp|P62253|UB2G1_HUMAN Ubiquitin-conjugating enzyme E2 G1 OS=Homo sapiens GN=UBE2G1 PE=1 SV=3;>tr|I3L2Q4|I3L2Q4_HUMAN Ubiquitin-conjugating enzyme E2 G1 OS=Homo sapiens GN=UBE2G1 PE=2 SV=1;>tr|I3L0Q0|I3L0Q0_HUMAN Ubiquitin-conjugating enzyme E2 G1 OS=Homo sapiens GN=UBE2G1 PE=2 SV=1	2;2;2	______________MTELQSALLLRRQLAEL	0.830448	6.90009	1	T	X;X;X;X;X;X;X;X;X;X;X;X;X;X;Oxidation (M);Phospho (STY);X;X;X;X;X;X;X;X;X;X;X;X;X;X;X	XXXXXXXXXXXXXXPPPPPPPPPPPPXXXXX	0.0442784	31.596	31.596	_(ac)M(ox)T(ph)ELQSALLLRR_	MT(0.83)ELQS(0.17)ALLLRR	MT(6.9)ELQS(-6.9)ALLLRR	2	3	523.6	-1.7595	452	495	2	2	3259	3479	42764	15429	42764	15429	3526	42764	15429	3526	42764	15429
NaN	NaN	NaN	NaN	21.9949	NaN			___1	NaN	NaN	NaN	0	1	0	>sp|Q3T906|GNPTA_HUMAN N-acetylglucosamine-1-phosphotransferase subunits alpha/beta OS=Homo sapiens GN=GNPTAB PE=1 SV=1;>sp|Q3T906-2|GNPTA_HUMAN Isoform 2 of N-acetylglucosamine-1-phosphotransferase subunits alpha/beta OS=Homo sapiens GN=GNPTAB	289;289	PKDFQELNKQTKKNMTIDGKELTISPAYLLW	1	84.5678	1	T	X;X;X;X;X;X;X;X;X;X;X;X;X;X;Oxidation (M);Phospho (STY);X;X;X;X;X;X;X;X;X;X;X;X;X;X;X	XXXXXXXXXXXXPPPPPPPPXXXXXXXXXXX	0.0249823	84.568	84.568	_KNM(ox)T(ph)IDGK_	KNMT(1)IDGK	KNMT(84.57)IDGK	4	2	501.72	2	480	693	289	289	2330	2461	31619	12201	31619	12201	3119	31619	12201	3119	31619	12201
NaN	NaN	NaN	23.8849	NaN	NaN			___1	NaN	NaN	NaN	0.8844	0	0	>sp|Q8NHS2|AATC2_HUMAN Putative aspartate aminotransferase, cytoplasmic 2 OS=Homo sapiens GN=GOT1L1 PE=2 SV=2	3	_____________MPTLSVFMDVPLAHKLEG	0.8844	8.68129	1	T	X;X;X;X;X;X;X;X;X;X;X;X;X;X;X;Phospho (STY);X;X;X;X;Oxidation (M);X;X;X;X;X;X;X;X;X;X	XXXXXXXXXXXXXPPPPPPPPPPPPPPPXXX	0.0280535	57.148	57.148	_(ac)MPT(ph)LSVFM(ox)DVPLAHK_	MPT(0.884)LS(0.116)VFMDVPLAHK	MPT(8.68)LS(-8.68)VFMDVPLAHK	3	2	912.427	-5.4549	524	851	3	3	3207	3424	42468	15323	42468	15323	5239	42468	15323	5239	42468	15323
NaN	NaN	NaN	21.8305	21.4336	19.9967			___1	NaN	NaN	NaN	0	1	0	>sp|Q96PY6|NEK1_HUMAN Serine/threonine-protein kinase Nek1 OS=Homo sapiens GN=NEK1 PE=1 SV=2;>sp|Q96PY6-3|NEK1_HUMAN Isoform 3 of Serine/threonine-protein kinase Nek1 OS=Homo sapiens GN=NEK1;>sp|Q96PY6-2|NEK1_HUMAN Isoform 2 of Serine/threonine-protein kinase Nek1 OS=Homo sapiens GN=NEK1;>sp|Q96PY6-6|NEK1_HUMAN Isoform 6 of Serine/threonine-protein kinase Nek1 OS=Homo sapiens GN=NEK1;>sp|Q96PY6-4…	141;141;141;141;141;141	HRDIKSQNIFLTKDGTVQLGDFGIARVLNST	1	93.7676	1	T	X;X;X;X;X;X;X;X;X;X;X;X;X;X;X;Phospho (STY);X;X;X;X;X;X;X;X;X;X;X;X;X;X;Phospho (STY)	XXXXXXXXXXXXXPPPPPPPPPPPPPXXXXX	0.013477	117.18	93.768	_DGT(ph)VQLGDFGIAR_	DGT(1)VQLGDFGIAR	DGT(93.77)VQLGDFGIAR	3	2	714.83	0.81494	551	926	141	141	602	635	8075;8076;8077;8078;8079	2870;2871	8076	2871	7755	8075	2870	7802	8076	2871
NaN	NaN	NaN	28.0226	NaN	27.1968			___1	NaN	NaN	NaN	0.995119	0	0.986045	>sp|Q96PY6|NEK1_HUMAN Serine/threonine-protein kinase Nek1 OS=Homo sapiens GN=NEK1 PE=1 SV=2;>sp|Q96PY6-3|NEK1_HUMAN Isoform 3 of Serine/threonine-protein kinase Nek1 OS=Homo sapiens GN=NEK1;>sp|Q96PY6-2|NEK1_HUMAN Isoform 2 of Serine/threonine-protein kinase Nek1 OS=Homo sapiens GN=NEK1;>sp|Q96PY6-6|NEK1_HUMAN Isoform 6 of Serine/threonine-protein kinase Nek1 OS=Homo sapiens GN=NEK1;>sp|Q96PY6-4…	156;156;156;156;156;156	TVQLGDFGIARVLNSTVELARTCIGTPYYLS	0.995119	23.0933	1	T	Phospho (STY);X;X;X;X;X;X;X;X;X;X;X;X;X;X;Phospho (STY);X;X;X;X;X;X;X;X;X;X;X;X;X;X;X	XXXXXXXXXXXPPPPPPPPPPXXXXXXXXXX	1.81481e-09	158.11	158.11	_VLNST(ph)VELAR_	VLNS(0.005)T(0.995)VELAR	VLNS(-23.09)T(23.09)VELAR	5	2	591.3	0.83015	554	926	156	156	4825	5159	62888;62889;62890	21673;21674;21675	62888	21673	4767	62888	21673	4767	62890	21675
NaN	NaN	NaN	20.3084	20.0327	NaN			___1	NaN	NaN	NaN	0.945725	0.991075	0.800253	>sp|Q96Q42|ALS2_HUMAN Alsin OS=Homo sapiens GN=ALS2 PE=1 SV=2;>sp|Q96Q42-3|ALS2_HUMAN Isoform 3 of Alsin OS=Homo sapiens GN=ALS2	510;510	LLRKAARVKTRTVVLTPTYSGEADALLPSLR	0.991075	21.299	1	T	X;X;X;X;X;X;X;X;X;X;X;X;X;X;X;Phospho (STY);X;X;X;X;X;X;X;X;X;X;X;X;X;X;X	XXXXXXXXXXXPPPPPPPPPPPPPPPPPPPP	1.57344e-22	173.18	173.18	_TVVLT(ph)PTYSGEADALLPSLR_	T(0.001)VVLT(0.991)PT(0.007)YSGEADALLPSLR	T(-29.27)VVLT(21.3)PT(-21.3)Y(-60.44)S(-33.9)GEADALLPS(-154.45)LR	5	2	1092.05	1.2612	556	928	510	510	4567	4888	60120;60121;60122;60123;60124;60125	20858;20859;20860;20861;20862;20863	60121	20859	9229	60121	20859	9229	60121	20859
NaN	NaN	NaN	NaN	NaN	20.5549			___1	NaN	NaN	NaN	0	0	1	>sp|Q9Y3Q7|ADA18_HUMAN Disintegrin and metalloproteinase domain-containing protein 18 OS=Homo sapiens GN=ADAM18 PE=2 SV=1;>sp|Q9Y3Q7-2|ADA18_HUMAN Isoform 2 of Disintegrin and metalloproteinase domain-containing protein 18 OS=Homo sapiens GN=ADAM18;>sp|Q9Y3Q7-3|ADA18_HUMAN Isoform 3 of Disintegrin and metalloproteinase domain-containing protein 18 OS=Homo sapiens GN=ADAM18;>tr|E5RK96|E5RK96_HUMAN…	9;9;9;9;9	_______MFLLLALLTELGRLQAHEGSEGIF	1	37.9948	1	T	X;X;X;X;X;X;X;Oxidation (M);X;X;X;X;X;X;X;Phospho (STY);X;X;X;X;X;X;X;X;X;X;X;X;X;X;X	XXXXXXXPPPPPPPPPPPPPXXXXXXXXXXX	0.0392732	37.995	37.995	_(ac)M(ox)FLLLALLT(ph)ELGR_	MFLLLALLT(1)ELGR	MFLLLALLT(37.99)ELGR	9	3	543.289	0.91538	636	1166	9	9	3089	3272	41034;41035	14963	41034	14963	5004	41034	14963	5004	41034	14963
NaN	NaN	NaN	NaN	20.3523	24.4724			___1	NaN	NaN	NaN	0	0	0.977708	>tr|M0QXV5|M0QXV5_HUMAN Prostacyclin receptor OS=Homo sapiens GN=PTGIR PE=2 SV=1	2	______________MTVVMAVCSLPLTIRCF	0.977708	16.4318	1	T	X;X;X;X;X;X;X;X;X;X;X;X;X;X;Oxidation (M);Phospho (STY);X;X;Oxidation (M);X;X;X;X;X;X;X;X;X;X;X;X	XXXXXXXXXXXXXXPPPPPPPPPPPPPPPXX	0.0248312	48.623	48.623	_(ac)M(ox)T(ph)VVM(ox)AVCSLPLTIR_	MT(0.978)VVMAVCS(0.022)LPLTIR	MT(16.43)VVMAVCS(-16.43)LPLT(-42.32)IR	2	2	922.94	1.3797	700	1264	2	2	3273	3497	42952;42953;42954;42955;42956	15469	42952	15469	8061	42952	15469	8061	42952	15469
NaN	NaN	NaN	22.6255	NaN	23.4445			___1	NaN	NaN	NaN	0	0	0.997036	>sp|P49720|PSB3_HUMAN Proteasome subunit beta type-3 OS=Homo sapiens GN=PSMB3 PE=1 SV=2;>tr|J3KRR2|J3KRR2_HUMAN Proteasome subunit beta type-3 OS=Homo sapiens GN=PSMB3 PE=2 SV=1;>tr|J3KSM3|J3KSM3_HUMAN Proteasome subunit beta type-3 OS=Homo sapiens GN=PSMB3 PE=2 SV=1	6;6;6	__________MSIMSYNGGAVMAMKGKNCVA	0.997036	26.8233	1;2	Y	X;X;X;X;X;X;X;X;X;X;X;X;X;Oxidation (M);Phospho (STY);Phospho (STY);X;X;X;X;X;Oxidation (M);X;Oxidation (M);X;X;X;X;X;X;X	XXXXXXXXXXXPPPPPPPPPPPPPPXXXXXX	0.00461042	71.558	71.558	_(ac)SIM(ox)SY(ph)NGGAVM(ox)AMK_	S(0.001)IMS(0.002)Y(0.997)NGGAVMAMK	S(-30.7)IMS(-26.82)Y(26.82)NGGAVMAMK	5	2	807.324	-1.525	742	425	6	6	3973	4256;4257	52018;52019;52020;52021;52022;52023;52024;52025;52026;52027	18309;18310	52019	18310	5184	52019	18310	5184	52019	18310
NaN	NaN	NaN	NaN	NaN	26.2206			___1	NaN	NaN	NaN	0	0	0.99692	>tr|B4DR87|B4DR87_HUMAN Procollagen-lysine,2-oxoglutarate 5-dioxygenase 1 OS=Homo sapiens GN=PLOD1 PE=2 SV=1;>sp|Q02809|PLOD1_HUMAN Procollagen-lysine,2-oxoglutarate 5-dioxygenase 1 OS=Homo sapiens GN=PLOD1 PE=1 SV=2;>tr|Q5JXB7|Q5JXB7_HUMAN Procollagen-lysine,2-oxoglutarate 5-dioxygenase 1 (Fragment) OS=Homo sapiens GN=PLOD1 PE=2 SV=1;>tr|Q5JXB8|Q5JXB8_HUMAN Procollagen-lysine,2-oxoglutarate 5-di…	207;160;160;207;160	VSDGKRFLGSGGFIGYAPNLSKLVAEWEGQD	0.99692	25.5729	1	Y	X;X;X;X;X;X;X;X;X;X;X;X;X;X;X;Phospho (STY);X;X;X;X;X;X;X;X;X;X;X;X;X;X;X	XXXXXXPPPPPPPPPPPPPPPPXXXXXXXXX	0.00468419	88.282	88.282	_FLGSGGFIGY(ph)APNLSK_	FLGSGGFIGY(0.997)APNLS(0.003)K	FLGS(-34.98)GGFIGY(25.57)APNLS(-25.57)K	10	2	854.411	0.026677	747	540	207	207	1292	1373	16117;16118;16119	5578;5579	16117	5578	10477	16117	5578	10477	16117	5578
NaN	NaN	NaN	24.8185	22.7124	22.1798			___1	NaN	NaN	NaN	0.822536	0	0	>sp|Q6P2D0|ZFP1_HUMAN Zinc finger protein 1 homolog OS=Homo sapiens GN=ZFP1 PE=2 SV=2	33	TQEEWEQLDPSQRILYMDVMLENYSNLLSVE	0.822536	9.49513	1	Y	X;X;X;X;X;X;X;X;X;X;X;X;X;X;X;Phospho (STY);Oxidation (M);X;X;Oxidation (M);X;X;X;X;X;X;X;X;X;X;X	XXXXXXXXXXXXXPPPPPPPPPPPPPPPPPP	0.0431558	32.121	32.121	_ILY(ph)M(ox)DVM(ox)LENYSNLLSVEVWK_	ILY(0.823)MDVMLENY(0.084)S(0.092)NLLS(0.001)VEVWK	ILY(9.5)MDVMLENY(-9.89)S(-9.5)NLLS(-30.91)VEVWK	3	3	891.086	2.0604	768	749	33	33	2067	2179	28420;28421;28422;28423;28424;28425;28426;28427	11216	28420	11216	8055	28420	11216	8055	28420	11216
NaN	NaN	NaN	22.2712	NaN	NaN			___1	NaN	NaN	NaN	1	0	0	>sp|Q6ZUB1|S31E1_HUMAN Spermatogenesis-associated protein 31E1 OS=Homo sapiens GN=SPATA31E1 PE=2 SV=2	1247	HPAQAREIGDKQERKYNQLQLEKGQTPPESH	1	105.396	1	Y	X;X;X;X;X;X;X;X;X;X;X;X;X;X;X;Phospho (STY);X;X;X;X;X;X;X;X;X;X;X;X;X;X;X	XXXXXXXXXXXXXXPPPPPPPPPXXXXXXXX	0.00746749	105.4	105.4	_KY(ph)NQLQLEK_	KY(1)NQLQLEK	KY(105.4)NQLQLEK	2	2	622.308	-1.5246	770	768	1247	1247	2411	2546	32350	12428	32350	12428	4324	32350	12428	4324	32350	12428
NaN	NaN	NaN	26.0981	23.2163	21.1741			___1	NaN	NaN	NaN	0.750036	0.663717	0	>sp|Q96PY6|NEK1_HUMAN Serine/threonine-protein kinase Nek1 OS=Homo sapiens GN=NEK1 PE=1 SV=2;>sp|Q96PY6-3|NEK1_HUMAN Isoform 3 of Serine/threonine-protein kinase Nek1 OS=Homo sapiens GN=NEK1;>sp|Q96PY6-2|NEK1_HUMAN Isoform 2 of Serine/threonine-protein kinase Nek1 OS=Homo sapiens GN=NEK1;>sp|Q96PY6-6|NEK1_HUMAN Isoform 6 of Serine/threonine-protein kinase Nek1 OS=Homo sapiens GN=NEK1;>sp|Q96PY6-4…	1125;1153;1081;1109;1056	QASMEQLLREQPGEEYSEEEESVLKNSDVEP	0.966821	14.681	1	Y	X;X;Phospho (STY);Oxidation (M);X;X;X;X;X;X;X;X;X;X;X;Phospho (STY);X;X;X;X;X;X;X;X;X;X;X;X;X;X;X	XXXXXXXXXPPPPPPPPPPPPPPPPXXXXXX	0.00393082	89.484	82.349	_EQPGEEY(ph)SEEEESVLK_	EQPGEEY(0.967)S(0.033)EEEESVLK	EQPGEEY(14.68)S(-14.68)EEEES(-35.46)VLK	7	2	981.399	0.0349	793	926	1125	1125	1070	1137	13189;13190;13191;13192;13193;13194;13195;13196;13197;13198;13199;13200;13201;13202	4453;4454;4455;4456;4457	13192	4456	6396	13189	4453	10687	13189	4453
NaN	NaN	NaN	NaN	22.4674	20.6145			___1	NaN	NaN	NaN	0	0	0.79497	>sp|Q9Y6J0|CABIN_HUMAN Calcineurin-binding protein cabin-1 OS=Homo sapiens GN=CABIN1 PE=1 SV=1;>tr|G5E9F3|G5E9F3_HUMAN Calcineurin binding protein 1, isoform CRA_b OS=Homo sapiens GN=CABIN1 PE=2 SV=1;>tr|B5MEB3|B5MEB3_HUMAN Calcineurin binding protein 1, isoform CRA_c OS=Homo sapiens GN=CABIN1 PE=2 SV=1	1889;1810;314	VAYDLGRVERIMSETYMLIKQVDEEAALEQA	0.79497	5.97252	1	Y	X;X;X;X;X;X;X;X;X;X;X;Oxidation (M);X;X;X;Phospho (STY);Oxidation (M);X;X;X;X;X;X;X;X;X;X;X;X;X;X	XXXXXXXXXXPPPPPPPPPPXXXXXXXXXXX	0.0408954	32.415	32.415	_IM(ox)SETY(ph)M(ox)LIK_	IMS(0.004)ET(0.201)Y(0.795)MLIK	IMS(-22.9)ET(-5.97)Y(5.97)MLIK	6	3	447.534	-0.11198	839	1182	1889	1889	2085	2204	28677;28678;28679;28680	11263	28677	11263	5219	28677	11263	5219	28677	11263
NaN	NaN	NaN	NaN	19.4194	NaN			___1	NaN	NaN	NaN	0	0.995924	0	>tr|B4DG89|B4DG89_HUMAN Nuclear protein localization protein 4 homolog OS=Homo sapiens GN=NPLOC4 PE=2 SV=1	6	__________MSFHAYIRKLTGGADKGKFVA	0.995924	23.8795	1	Y	X;X;X;X;X;X;X;X;X;X;X;X;X;X;X;Phospho (STY);X;X;X;X;X;X;X;X;X;X;X;X;X;X;X	XXXXXXXXXXPPPPPPPPPXXXXXXXXXXXX	0.0414714	38.086	38.086	_(ac)MSFHAY(ph)IRK_	MS(0.004)FHAY(0.996)IRK	MS(-23.88)FHAY(23.88)IRK	6	3	425.53	0.73044	842	1196	6	6	3233	3452	42624	15372	42624	15372	1548	42624	15372	1548	42624	15372
NaN	NaN	NaN	NaN	21.9491	20.8247			___2	NaN	NaN	NaN	0	0.752139	0	>sp|Q6J9G0|STYK1_HUMAN Tyrosine-protein kinase STYK1 OS=Homo sapiens GN=STYK1 PE=1 SV=4	349	SILEHLQRRKIMKRPSSCTHTMYSIMKSCWR	0.752139	4.82978	2	S	X;X;X;X;X;X;X;X;X;X;X;X;X;X;X;Phospho (STY);X;X;X;X;X;X;X;Phospho (STY);X;Oxidation (M);X;X;X;X;X	XXXXXXXXXXXXXPPPPPPPPPPPPPPXXXX	0.0211124	69.935	69.935	_RPS(ph)SCTHTMYS(ph)IM(ox)K_	RPS(0.752)S(0.247)CT(0.001)HT(0.001)MY(0.01)S(0.989)IMK	RPS(4.83)S(-4.83)CT(-31.02)HT(-32.82)MY(-19.86)S(19.86)IMK	3	2	937.855	0.83712	139	741	349	349	3791	4059	49478;49479;49480;49481	17475	49478	17475	2743	49478	17475	2743	49478	17475
NaN	NaN	NaN	NaN	21.9491	20.8247			___2	NaN	NaN	NaN	0	0.988715	0	>sp|Q6J9G0|STYK1_HUMAN Tyrosine-protein kinase STYK1 OS=Homo sapiens GN=STYK1 PE=1 SV=4	357	RKIMKRPSSCTHTMYSIMKSCWRWREADRPS	0.988715	19.8571	2	S	X;X;X;X;X;X;X;Phospho (STY);X;X;X;X;X;X;X;Phospho (STY);X;Oxidation (M);X;X;X;X;X;X;X;X;X;X;X;X;X	XXXXXPPPPPPPPPPPPPPXXXXXXXXXXXX	0.0211124	69.935	69.935	_RPS(ph)SCTHTMYS(ph)IM(ox)K_	RPS(0.752)S(0.247)CT(0.001)HT(0.001)MY(0.01)S(0.989)IMK	RPS(4.83)S(-4.83)CT(-31.02)HT(-32.82)MY(-19.86)S(19.86)IMK	11	2	937.855	0.83712	140	741	357	357	3791	4059	49478;49479;49480;49481	17475	49478	17475	2743	49478	17475	2743	49478	17475
NaN	NaN	NaN	NaN	NaN	22.8103			___2	NaN	NaN	NaN	0	0	0.999269	>sp|Q8N715|CA065_HUMAN Uncharacterized protein C1orf65 OS=Homo sapiens GN=C1orf65 PE=2 SV=2	5	___________MAGFSHFSQPPYRDLWEPPR	0.999269	31.2606	2	S	X;X;X;X;X;X;X;X;X;X;X;Oxidation (M);X;X;X;Phospho (STY);X;X;X;X;X;X;Phospho (STY);X;X;X;X;X;X;X;X	XXXXXXXXXXXPPPPPPPPPPPPPXXXXXXX	0.00747932	57.802	57.802	_(ac)M(ox)AGFS(ph)HFSQPPY(ph)R_	MAGFS(0.999)HFS(0.023)QPPY(0.978)R	MAGFS(31.26)HFS(-16.4)QPPY(16.4)R	5	2	871.825	-1.6628	178	834	5	5	3000	3170	40270	14781	40270	14781	6779	40270	14781	6779	40270	14781
NaN	NaN	NaN	NaN	21.2619	NaN			___2	NaN	NaN	NaN	0	0.944165	0	>sp|Q96PY6|NEK1_HUMAN Serine/threonine-protein kinase Nek1 OS=Homo sapiens GN=NEK1 PE=1 SV=2;>sp|Q96PY6-3|NEK1_HUMAN Isoform 3 of Serine/threonine-protein kinase Nek1 OS=Homo sapiens GN=NEK1;>sp|Q96PY6-2|NEK1_HUMAN Isoform 2 of Serine/threonine-protein kinase Nek1 OS=Homo sapiens GN=NEK1;>sp|Q96PY6-6|NEK1_HUMAN Isoform 6 of Serine/threonine-protein kinase Nek1 OS=Homo sapiens GN=NEK1;>sp|Q96PY6-4…	649;677;605;633;580	EKKVWEEHLVAKGVKSSDVSPPLGQHETGGS	0.944165	13.0329	2	S	X;X;X;X;X;X;X;X;X;X;X;X;X;X;X;Phospho (STY);X;X;X;X;X;X;X;X;X;X;X;X;X;X;Phospho (STY)	XXXXXXXXXXXXPPPPPPPPPPPPPPPPPPP	8.99249e-09	123.51	123.51	_GVKS(ph)SDVSPPLGQHETGGS(ph)PSK_	GVKS(0.944)S(0.056)DVSPPLGQHET(0.196)GGS(0.672)PS(0.132)K	GVKS(13.03)S(-13.03)DVS(-43.84)PPLGQHET(-5.56)GGS(5.56)PS(-7.06)K	4	2	1156	1.5562	210	926	649	649	1715;4116;4117	1812;4409;4410;4411	23223	9432	23223	9432	3667	23223	9432	3667	23223	9432
NaN	NaN	NaN	24.9032	24.9322	NaN			___2	NaN	NaN	NaN	0	0	0.464565	>sp|Q96PY6|NEK1_HUMAN Serine/threonine-protein kinase Nek1 OS=Homo sapiens GN=NEK1 PE=1 SV=2;>sp|Q96PY6-3|NEK1_HUMAN Isoform 3 of Serine/threonine-protein kinase Nek1 OS=Homo sapiens GN=NEK1;>sp|Q96PY6-2|NEK1_HUMAN Isoform 2 of Serine/threonine-protein kinase Nek1 OS=Homo sapiens GN=NEK1;>sp|Q96PY6-6|NEK1_HUMAN Isoform 6 of Serine/threonine-protein kinase Nek1 OS=Homo sapiens GN=NEK1;>sp|Q96PY6-4…	653;681;609;637;584	WEEHLVAKGVKSSDVSPPLGQHETGGSPSKQ	0.994088	25.0544	2	S	X;X;X;X;X;X;X;X;X;X;X;X;X;X;X;Phospho (STY);X;X;X;X;X;X;X;X;X;X;Phospho (STY);X;Phospho (STY);X;X	XXXXXXXXXXXPPPPPPPPPPPPPPPPPPPX	0.000535501	109.42	109.42	_SSDVS(ph)PPLGQHETGGS(ph)PSK_	S(0.003)S(0.003)DVS(0.994)PPLGQHET(0.086)GGS(0.86)PS(0.054)K	S(-25.63)S(-25.05)DVS(25.05)PPLGQHET(-10.03)GGS(10.03)PS(-12.02)K	5	2	1013.91	0.030729	211	926	653	653	1715;4116;4117	1812;4409;4410;4411	54148;54149;54150;54151;54152	18939;18940	54148	18939	3761	54148	18939	3761	54148	18939
NaN	NaN	NaN	24.9032	25.0413	NaN			___2	NaN	NaN	NaN	0.490167	0.995079	0.959289	>sp|Q96PY6|NEK1_HUMAN Serine/threonine-protein kinase Nek1 OS=Homo sapiens GN=NEK1 PE=1 SV=2;>sp|Q96PY6-3|NEK1_HUMAN Isoform 3 of Serine/threonine-protein kinase Nek1 OS=Homo sapiens GN=NEK1;>sp|Q96PY6-2|NEK1_HUMAN Isoform 2 of Serine/threonine-protein kinase Nek1 OS=Homo sapiens GN=NEK1;>sp|Q96PY6-6|NEK1_HUMAN Isoform 6 of Serine/threonine-protein kinase Nek1 OS=Homo sapiens GN=NEK1;>sp|Q96PY6-4…	664;692;620;648;595	SSDVSPPLGQHETGGSPSKQQMRSVISVTSA	0.99943	32.4469	1;2	S	Phospho (STY);X;X;X;Phospho (STY);X;X;X;X;X;X;X;X;X;X;Phospho (STY);X;X;X;X;X;Oxidation (M);X;X;X;X;X;X;X;X;X	PPPPPPPPPPPPPPPPPPPPPPPXXXXXXXX	8.67772e-46	205.63	205.63	_SSDVSPPLGQHETGGS(ph)PSK_	SSDVSPPLGQHETGGS(0.999)PS(0.001)K	S(-141.76)S(-141.76)DVS(-101.45)PPLGQHET(-60.68)GGS(32.45)PS(-32.45)K	16	2	973.928	0.41675	212	926	664	664	1715;4116;4117	1812;4409;4410;4411	23223;54138;54139;54140;54141;54142;54143;54144;54145;54146;54147;54148;54150;54151	9432;18930;18931;18932;18933;18934;18935;18936;18937;18938;18939	54140	18933	3299	54140	18933	3299	54140	18933
NaN	NaN	NaN	24.9667	23.0385	19.4045			___2	NaN	NaN	NaN	1	0.999834	0.999933	>sp|Q96PY6|NEK1_HUMAN Serine/threonine-protein kinase Nek1 OS=Homo sapiens GN=NEK1 PE=1 SV=2;>sp|Q96PY6-3|NEK1_HUMAN Isoform 3 of Serine/threonine-protein kinase Nek1 OS=Homo sapiens GN=NEK1;>sp|Q96PY6-2|NEK1_HUMAN Isoform 2 of Serine/threonine-protein kinase Nek1 OS=Homo sapiens GN=NEK1;>sp|Q96PY6-6|NEK1_HUMAN Isoform 6 of Serine/threonine-protein kinase Nek1 OS=Homo sapiens GN=NEK1;>sp|Q96PY6-4…	874;902;830;858;805	EINPSAIVDSPVETKSPEFSEASPQMSLKLE	1	69.531	1;2	S	X;X;X;X;Phospho (STY);X;X;X;X;Phospho (STY);X;X;X;X;X;Phospho (STY);X;X;X;X;X;X;Phospho (STY);X;X;Oxidation (M);X;X;X;X;X	PPPPPPPPPPPPPPPPPPPPPPPPPPPPPXX	3.24587e-14	159.13	152.94	_S(ph)PEFSEASPQM(ox)SLK_	S(1)PEFSEASPQMSLK	S(69.53)PEFS(-69.53)EAS(-88.66)PQMS(-114.71)LK	1	2	817.344	-0.77553	216	926	874	874	2396;4068;4901	2530;4358;4359;5243	32214;32216;32217;32218;32219;53533;53535;53538;53540;53542;53543;53544;53545;53546;53547	12381;18693;18694;18696;18697;18698;18701;18703;18704;18705	53533	18694	4846	53535	18697	4830	32213	12380
NaN	NaN	NaN	24.9667	23.0385	19.4045			___2	NaN	NaN	NaN	0.984972	0.994057	0.965895	>sp|Q96PY6|NEK1_HUMAN Serine/threonine-protein kinase Nek1 OS=Homo sapiens GN=NEK1 PE=1 SV=2;>sp|Q96PY6-3|NEK1_HUMAN Isoform 3 of Serine/threonine-protein kinase Nek1 OS=Homo sapiens GN=NEK1;>sp|Q96PY6-2|NEK1_HUMAN Isoform 2 of Serine/threonine-protein kinase Nek1 OS=Homo sapiens GN=NEK1;>sp|Q96PY6-6|NEK1_HUMAN Isoform 6 of Serine/threonine-protein kinase Nek1 OS=Homo sapiens GN=NEK1;>sp|Q96PY6-4…	881;909;837;865;812	VDSPVETKSPEFSEASPQMSLKLEGNLEEPD	0.999767	39.5618	1;2	S	X;X;Phospho (STY);X;X;X;X;X;Phospho (STY);X;X;X;X;X;X;Phospho (STY);X;X;Oxidation (M);X;X;X;X;X;X;X;X;X;X;X;X	XXXXXXXXPPPPPPPPPPPPPPXXXXXXXXX	8.44277e-05	129.05	119.08	_SPEFSEAS(ph)PQM(ox)SLK_	SPEFSEAS(1)PQMSLK	S(-45.91)PEFS(-39.56)EAS(39.56)PQMS(-40.13)LK	8	2	817.344	0.11418	218	926	881	881	2396;4068;4901	2530;4358;4359;5243	53534;53536;53537;53539;53541;53542;53543;53544;53545;53546;53547	18695;18699;18700;18702;18703;18704;18705	53537	18700	4560	53534	18695	4562	53544	18705
NaN	NaN	NaN	25.8328	NaN	NaN			___2	NaN	NaN	NaN	0.999999	0	0	>sp|Q96PY6|NEK1_HUMAN Serine/threonine-protein kinase Nek1 OS=Homo sapiens GN=NEK1 PE=1 SV=2;>sp|Q96PY6-3|NEK1_HUMAN Isoform 3 of Serine/threonine-protein kinase Nek1 OS=Homo sapiens GN=NEK1;>sp|Q96PY6-2|NEK1_HUMAN Isoform 2 of Serine/threonine-protein kinase Nek1 OS=Homo sapiens GN=NEK1;>sp|Q96PY6-6|NEK1_HUMAN Isoform 6 of Serine/threonine-protein kinase Nek1 OS=Homo sapiens GN=NEK1;>sp|Q96PY6-4…	1052;1080;1008;1036;983	TGLFDANNPKMLRTCSLPDLSKLFRTLMDVP	0.999999	62.1624	1;2	S	X;X;X;X;X;X;X;X;X;X;Oxidation (M);X;X;Phospho (STY);X;Phospho (STY);X;X;X;X;X;X;X;X;X;X;X;Oxidation (M);X;X;X	XXXXXXXXXXPPPPPPPPPPPPXXXXXXXXX	0.00887511	125.97	104.26	_M(ox)LRT(ph)CS(ph)LPDLSK_	MLRT(1)CS(1)LPDLSK	MLRT(83.87)CS(62.16)LPDLS(-62.16)K	6	2	798.832	0.31793	219	926	1052	1052	3168;4275	3379;4574	42172;55905;55906;55907;55908;55909;55910;55911;55912;55913	15246;19497;19498	42172	15246	5303	55905	19497	4602	55905	19497
NaN	NaN	NaN	NaN	NaN	17.626			___2	NaN	NaN	NaN	0	0	0.985647	>sp|Q9H611-3|PIF1_HUMAN Isoform 3 of ATP-dependent DNA helicase PIF1 OS=Homo sapiens GN=PIF1;>sp|Q9H611|PIF1_HUMAN ATP-dependent DNA helicase PIF1 OS=Homo sapiens GN=PIF1 PE=1 SV=2;>sp|Q9H611-2|PIF1_HUMAN Isoform 2 of ATP-dependent DNA helicase PIF1 OS=Homo sapiens GN=PIF1	15;15;15	_MLSGIEAAAGEYEDSELRCRVAVEELSPGG	0.985647	17.4565	2	S	X;Oxidation (M);X;X;X;X;X;X;X;X;X;X;Phospho (STY);X;X;Phospho (STY);X;X;X;X;X;X;X;X;X;X;X;X;X;X;X	XPPPPPPPPPPPPPPPPPPXXXXXXXXXXXX	0.0185806	31.876	31.876	_(ac)M(ox)LSGIEAAAGEY(ph)EDS(ph)ELR_	MLS(0.201)GIEAAAGEY(0.813)EDS(0.986)ELR	MLS(-6.32)GIEAAAGEY(6.32)EDS(17.46)ELR	15	3	720.281	1.125	250	1009	15	15	3169	3380	42173	15247	42173	15247	3477	42173	15247	3477	42173	15247
NaN	NaN	NaN	16.6769	NaN	NaN			___2	NaN	NaN	NaN	1	0	0	>sp|Q9HAU5|RENT2_HUMAN Regulator of nonsense transcripts 2 OS=Homo sapiens GN=UPF2 PE=1 SV=1	725	CGRFLFRSPESHLRTSVLLEQMMRKKQAMHL	1	31.9138	2	S	X;X;X;X;X;X;X;X;X;X;X;X;X;X;Phospho (STY);Phospho (STY);X;X;X;X;X;Oxidation (M);Oxidation (M);X;X;X;X;X;X;X;X	XXXXXXXXXXXXXXPPPPPPPPPPPXXXXXX	0.0410918	31.914	31.914	_T(ph)S(ph)VLLEQM(ox)M(ox)RK_	T(1)S(1)VLLEQMMRK	T(31.91)S(31.91)VLLEQMMRK	2	2	764.321	-1.8687	254	1022	725	725	4515	4832	59527	20671	59527	20671	8016	59527	20671	8016	59527	20671
NaN	NaN	NaN	NaN	23.8059	22.0794			___2	NaN	NaN	NaN	0	0	0.99621	>sp|Q9P0N9-3|TBCD7_HUMAN Isoform 3 of TBC1 domain family member 7 OS=Homo sapiens GN=TBC1D7	5	___________MEGASRNLASTPRVHAKVMM	0.99621	23.7475	2	S	X;X;X;X;X;X;X;X;X;X;X;X;X;X;X;Phospho (STY);X;X;X;X;X;Phospho (STY);X;X;X;X;X;X;X;X;X	XXXXXXXXXXXPPPPPPPPPPPPPXXXXXXX	0.0284153	81.92	81.92	_MEGAS(ph)RNLAST(ph)PR_	MEGAS(0.996)RNLAS(0.102)T(0.902)PR	MEGAS(23.75)RNLAS(-9.63)T(9.63)PR	5	2	775.315	-1.1947	277	1073	5	5	3058	3236	40853;40854;40855;40856	14892	40853	14892	3703	40853	14892	3703	40853	14892
NaN	NaN	NaN	19.9697	NaN	NaN			___2	NaN	NaN	NaN	0.999911	0	0	>sp|Q9P2H0|K1377_HUMAN Uncharacterized protein KIAA1377 OS=Homo sapiens GN=KIAA1377 PE=1 SV=3;>tr|F5H5S1|F5H5S1_HUMAN Uncharacterized protein KIAA1377 OS=Homo sapiens GN=KIAA1377 PE=2 SV=1	399;200	EKTSETSTMRTTDSTSGAFKRERPLVTESPT	0.999911	40.958	2	S	X;X;X;X;X;X;X;X;X;X;Phospho (STY);X;X;X;X;Phospho (STY);X;X;X;X;X;X;X;X;X;X;X;X;X;X;X	XXXXXXXXXXPPPPPPPPPPPXXXXXXXXXX	0.0370227	80.688	80.688	_T(ph)TDSTS(ph)GAFKR_	T(0.388)T(0.388)DS(0.225)TS(1)GAFKR	T(0)T(0)DS(-2.36)T(-35.41)S(40.96)GAFKR	6	3	444.174	-2.8918	285	1081	399	399	4522	4840	59659	20700	59659	20700	2765	59659	20700	2765	59659	20700
NaN	NaN	NaN	20.7617	20.8655	NaN			___2	NaN	NaN	NaN	0.984767	0	0	>sp|Q9P2J8|ZN624_HUMAN Zinc finger protein 624 OS=Homo sapiens GN=ZNF624 PE=2 SV=3;>tr|J3QKY7|J3QKY7_HUMAN Zinc finger protein 624 (Fragment) OS=Homo sapiens GN=ZNF624 PE=2 SV=1;>tr|C9J5H1|C9J5H1_HUMAN Zinc finger protein 624 (Fragment) OS=Homo sapiens GN=ZNF624 PE=2 SV=1	9;9;9	_______MSLQDSTLSREGKPEGEIMAAVFF	0.984767	18.5262	2	S	X;X;X;X;X;X;X;Oxidation (M);X;X;X;X;X;Phospho (STY);X;Phospho (STY);X;X;X;X;X;X;X;X;X;X;X;X;X;X;X	XXXXXXXPPPPPPPPPPXXXXXXXXXXXXXX	0.043998	36.585	36.585	_(ac)M(ox)SLQDST(ph)LS(ph)R_	MS(0.003)LQDS(0.059)T(0.953)LS(0.985)R	MS(-29.55)LQDS(-13.21)T(13.21)LS(18.53)R	9	2	678.251	0.58882	286	1083	9	9	3241	3460	42650;42651;42652	15383	42650	15383	5804	42650	15383	5804	42650	15383
NaN	NaN	NaN	23.977	27.534	18.9715			___2	NaN	NaN	NaN	0.970488	0.5	0	>sp|Q9Y2Q0|AT8A1_HUMAN Probable phospholipid-transporting ATPase IA OS=Homo sapiens GN=ATP8A1 PE=1 SV=1;>sp|Q9Y2Q0-2|AT8A1_HUMAN Isoform 2 of Probable phospholipid-transporting ATPase IA OS=Homo sapiens GN=ATP8A1;>sp|Q9Y2Q0-3|AT8A1_HUMAN Isoform 3 of Probable phospholipid-transporting ATPase IA OS=Homo sapiens GN=ATP8A1	551;536;536	GQEERYELLNVLEFTSARKRMSVIVRTPSGK	0.999873	38.978	2	S	X;X;X;X;X;Phospho (STY);X;X;X;X;X;X;X;X;X;Phospho (STY);X;X;X;X;X;X;X;X;X;X;X;X;X;X;X	XXXXXPPPPPPPPPPPPPPXXXXXXXXXXXX	0.00066286	123.28	123.28	_Y(ph)ELLNVLEFTS(ph)ARK_	Y(1)ELLNVLEFTS(1)ARK	Y(96.5)ELLNVLEFT(-38.98)S(38.98)ARK	11	2	921.926	1.4226	307	1152	551	551	5063	5414	65438;65439;65440;65441;65442;65443;65444;65445;65446;65447;65448;65449;65450;65451;65452;65453;65454;65455;65456;65457;65458	22436;22437;22438;22439;22440;22441;22442	65442	22440	16054	65442	22440	16054	65442	22440
NaN	NaN	NaN	19.2045	NaN	18.552			___2	NaN	NaN	NaN	0	0	0.883759	>sp|O43149|ZZEF1_HUMAN Zinc finger ZZ-type and EF-hand domain-containing protein 1 OS=Homo sapiens GN=ZZEF1 PE=1 SV=6;>tr|I3L141|I3L141_HUMAN Zinc finger ZZ-type and EF-hand domain-containing protein 1 (Fragment) OS=Homo sapiens GN=ZZEF1 PE=4 SV=1;>sp|O43149-2|ZZEF1_HUMAN Isoform 2 of Zinc finger ZZ-type and EF-hand domain-containing protein 1 OS=Homo sapiens GN=ZZEF1	2181;569;568	LFAAGDSSIVPDGWKTTHLLFSLGAVCLDSR	0.883759	8.19739	2	T	X;X;X;X;X;X;X;X;X;X;X;X;X;X;X;Phospho (STY);Phospho (STY);X;X;X;X;X;X;X;X;X;X;X;X;X;X	XXXXXXXXXXXXXXXPPPPPPPPPPPPPPPP	0.0332304	62.287	62.287	_T(ph)T(ph)HLLFSLGAVCLDSR_	T(0.884)T(0.884)HLLFS(0.232)LGAVCLDSR	T(8.2)T(8.2)HLLFS(-8.2)LGAVCLDS(-55.82)R	1	2	975.433	1.7952	392	52	2181	2181	4530	4849	59720;59721;59722	20717	59720	20717	10440	59720	20717	10440	59720	20717
NaN	NaN	NaN	19.2045	NaN	18.552			___2	NaN	NaN	NaN	0	0	0.883759	>sp|O43149|ZZEF1_HUMAN Zinc finger ZZ-type and EF-hand domain-containing protein 1 OS=Homo sapiens GN=ZZEF1 PE=1 SV=6;>tr|I3L141|I3L141_HUMAN Zinc finger ZZ-type and EF-hand domain-containing protein 1 (Fragment) OS=Homo sapiens GN=ZZEF1 PE=4 SV=1;>sp|O43149-2|ZZEF1_HUMAN Isoform 2 of Zinc finger ZZ-type and EF-hand domain-containing protein 1 OS=Homo sapiens GN=ZZEF1	2182;570;569	FAAGDSSIVPDGWKTTHLLFSLGAVCLDSRV	0.883759	8.19739	2	T	X;X;X;X;X;X;X;X;X;X;X;X;X;X;Phospho (STY);Phospho (STY);X;X;X;X;X;X;X;X;X;X;X;X;X;X;X	XXXXXXXXXXXXXXPPPPPPPPPPPPPPPPX	0.0332304	62.287	62.287	_T(ph)T(ph)HLLFSLGAVCLDSR_	T(0.884)T(0.884)HLLFS(0.232)LGAVCLDSR	T(8.2)T(8.2)HLLFS(-8.2)LGAVCLDS(-55.82)R	2	2	975.433	1.7952	393	52	2182	2182	4530	4849	59720;59721;59722	20717	59720	20717	10440	59720	20717	10440	59720	20717
NaN	NaN	NaN	NaN	24.3735	NaN			___2	NaN	NaN	NaN	0	0.999972	0	>tr|J3KPZ3|J3KPZ3_HUMAN Probable E3 ubiquitin-protein ligase MYCBP2 OS=Homo sapiens GN=MYCBP2 PE=2 SV=1;>sp|O75592|MYCB2_HUMAN Probable E3 ubiquitin-protein ligase MYCBP2 OS=Homo sapiens GN=MYCBP2 PE=1 SV=3;>sp|O75592-2|MYCB2_HUMAN Isoform 2 of Probable E3 ubiquitin-protein ligase MYCBP2 OS=Homo sapiens GN=MYCBP2	545;507;507	ESAILGAGREFALMKTANGKIYYTGKYQSLG	0.999972	48.454	2	T	X;X;X;X;X;X;X;X;X;X;X;X;X;X;X;Phospho (STY);X;X;X;X;X;X;X;Phospho (STY);X;X;X;X;X;X;X	XXXXXXXXXXXXXXXPPPPPPPPPPPXXXXX	0.0370981	98.676	98.676	_T(ph)ANGKIYYT(ph)GK_	T(1)ANGKIYY(0.011)T(0.989)GK	T(48.45)ANGKIY(-34.45)Y(-19.59)T(19.59)GK	1	2	688.288	0.15339	406	106	545	545	4262	4560	55779	19463	55779	19463	2759	55779	19463	2759	55779	19463
NaN	NaN	NaN	NaN	24.3735	NaN			___2	NaN	NaN	NaN	0	0.988773	0	>tr|J3KPZ3|J3KPZ3_HUMAN Probable E3 ubiquitin-protein ligase MYCBP2 OS=Homo sapiens GN=MYCBP2 PE=2 SV=1;>sp|O75592|MYCB2_HUMAN Probable E3 ubiquitin-protein ligase MYCBP2 OS=Homo sapiens GN=MYCBP2 PE=1 SV=3;>sp|O75592-2|MYCB2_HUMAN Isoform 2 of Probable E3 ubiquitin-protein ligase MYCBP2 OS=Homo sapiens GN=MYCBP2	553;515;515	REFALMKTANGKIYYTGKYQSLGIKQGGPSA	0.988773	19.5877	2	T	X;X;X;X;X;X;X;Phospho (STY);X;X;X;X;X;X;X;Phospho (STY);X;X;X;X;X;X;X;X;X;X;X;X;X;X;X	XXXXXXXPPPPPPPPPPPXXXXXXXXXXXXX	0.0370981	98.676	98.676	_T(ph)ANGKIYYT(ph)GK_	T(1)ANGKIYY(0.011)T(0.989)GK	T(48.45)ANGKIY(-34.45)Y(-19.59)T(19.59)GK	9	2	688.288	0.15339	407	106	553	553	4262	4560	55779	19463	55779	19463	2759	55779	19463	2759	55779	19463
NaN	NaN	NaN	20.3606	17.9564	16.9688			___2	NaN	NaN	NaN	0	0	0.944106	>sp|Q7Z7G0-4|TARSH_HUMAN Isoform 4 of Target of Nesh-SH3 OS=Homo sapiens GN=ABI3BP	2	______________MTIVPTTDIEPVTVRTE	0.993478	24.6819	2	T	X;X;X;X;X;X;X;X;X;X;X;X;X;X;X;Phospho (STY);X;X;X;X;X;X;X;X;X;X;Phospho (STY);X;X;X;X	XXXXXXXXXXXXXXXPPPPPPPPPPPPPPXX	0.0305179	47.082	37.237	_(ac)T(ph)IVPTTDIEPVT(ph)VR_	T(0.993)IVPT(0.021)T(0.02)DIEPVT(0.966)VR	T(24.68)IVPT(-17.42)T(-17.68)DIEPVT(17.42)VR	1	2	871.904	5.2094	506	787	2	2	4386	4696	57739;57740;57741;57742;57743;57744;57745	20214;20215	57740	20215	16820	57739	20214	15796	57739	20214
NaN	NaN	NaN	20.3606	17.9564	16.9688			___2	NaN	NaN	NaN	0	0	0.996379	>sp|Q7Z7G0-4|TARSH_HUMAN Isoform 4 of Target of Nesh-SH3 OS=Homo sapiens GN=ABI3BP	13	___MTIVPTTDIEPVTVRTEATVTTLAPKTS	0.996379	25.7732	2	T	X;X;X;X;Phospho (STY);X;X;X;X;X;X;X;X;X;X;Phospho (STY);X;X;X;X;X;X;X;X;X;X;X;X;X;X;X	XXXXPPPPPPPPPPPPPPXXXXXXXXXXXXX	0.0305179	47.082	47.082	_(ac)T(ph)IVPTTDIEPVT(ph)VR_	T(0.944)IVPT(0.031)T(0.029)DIEPVT(0.996)VR	T(15.01)IVPT(-15.01)T(-15.56)DIEPVT(25.77)VR	12	2	871.904	1.7172	507	787	13	13	4386	4696	57739;57740;57741;57742;57743;57744;57745	20214;20215	57739	20214	15796	57739	20214	15796	57739	20214
NaN	NaN	NaN	25.8328	NaN	NaN			___2	NaN	NaN	NaN	1	0	0	>sp|Q96PY6|NEK1_HUMAN Serine/threonine-protein kinase Nek1 OS=Homo sapiens GN=NEK1 PE=1 SV=2;>sp|Q96PY6-3|NEK1_HUMAN Isoform 3 of Serine/threonine-protein kinase Nek1 OS=Homo sapiens GN=NEK1;>sp|Q96PY6-2|NEK1_HUMAN Isoform 2 of Serine/threonine-protein kinase Nek1 OS=Homo sapiens GN=NEK1;>sp|Q96PY6-6|NEK1_HUMAN Isoform 6 of Serine/threonine-protein kinase Nek1 OS=Homo sapiens GN=NEK1;>sp|Q96PY6-4…	1050;1078;1006;1034;981	LSTGLFDANNPKMLRTCSLPDLSKLFRTLMD	1	83.8682	2	T	X;X;X;X;X;X;X;X;X;X;X;X;Oxidation (M);X;X;Phospho (STY);X;Phospho (STY);X;X;X;X;X;X;X;X;X;X;X;Oxidation (M);X	XXXXXXXXXXXXPPPPPPPPPPPPXXXXXXX	0.0102204	104.26	104.26	_M(ox)LRT(ph)CS(ph)LPDLSK_	MLRT(1)CS(1)LPDLSK	MLRT(83.87)CS(62.16)LPDLS(-62.16)K	4	2	798.832	0.31793	553	926	1050	1050	3168;4275	3379;4574	42172	15246	42172	15246	5303	42172	15246	5303	42172	15246
NaN	NaN	NaN	16.6769	NaN	NaN			___2	NaN	NaN	NaN	1	0	0	>sp|Q9HAU5|RENT2_HUMAN Regulator of nonsense transcripts 2 OS=Homo sapiens GN=UPF2 PE=1 SV=1	724	TCGRFLFRSPESHLRTSVLLEQMMRKKQAMH	1	31.9138	2	T	X;X;X;X;X;X;X;X;X;X;X;X;X;X;X;Phospho (STY);Phospho (STY);X;X;X;X;X;Oxidation (M);Oxidation (M);X;X;X;X;X;X;X	XXXXXXXXXXXXXXXPPPPPPPPPPPXXXXX	0.0410918	31.914	31.914	_T(ph)S(ph)VLLEQM(ox)M(ox)RK_	T(1)S(1)VLLEQMMRK	T(31.91)S(31.91)VLLEQMMRK	1	2	764.321	-1.8687	592	1022	724	724	4515	4832	59527	20671	59527	20671	8016	59527	20671	8016	59527	20671
NaN	NaN	NaN	NaN	23.8059	22.0794			___2	NaN	NaN	NaN	0	0	0.902156	>sp|Q9P0N9-3|TBCD7_HUMAN Isoform 3 of TBC1 domain family member 7 OS=Homo sapiens GN=TBC1D7	11	_____MEGASRNLASTPRVHAKVMMYRKEQY	0.902156	9.62919	2	T	X;X;X;X;X;X;X;X;X;Phospho (STY);X;X;X;X;X;Phospho (STY);X;X;X;X;X;X;X;X;X;X;X;X;X;X;X	XXXXXPPPPPPPPPPPPPXXXXXXXXXXXXX	0.0284153	81.92	81.92	_MEGAS(ph)RNLAST(ph)PR_	MEGAS(0.996)RNLAS(0.102)T(0.902)PR	MEGAS(23.75)RNLAS(-9.63)T(9.63)PR	11	2	775.315	-1.1947	609	1073	11	11	3058	3236	40853;40854;40855;40856	14892	40853	14892	3703	40853	14892	3703	40853	14892
NaN	NaN	NaN	20.7617	20.8655	NaN			___2	NaN	NaN	NaN	0.95326	0	0	>sp|Q9P2J8|ZN624_HUMAN Zinc finger protein 624 OS=Homo sapiens GN=ZNF624 PE=2 SV=3;>tr|J3QKY7|J3QKY7_HUMAN Zinc finger protein 624 (Fragment) OS=Homo sapiens GN=ZNF624 PE=2 SV=1;>tr|C9J5H1|C9J5H1_HUMAN Zinc finger protein 624 (Fragment) OS=Homo sapiens GN=ZNF624 PE=2 SV=1	7;7;7	_________MSLQDSTLSREGKPEGEIMAAV	0.95326	13.2124	2	T	X;X;X;X;X;X;X;X;X;Oxidation (M);X;X;X;X;X;Phospho (STY);X;Phospho (STY);X;X;X;X;X;X;X;X;X;X;X;X;X	XXXXXXXXXPPPPPPPPPPXXXXXXXXXXXX	0.043998	36.585	36.585	_(ac)M(ox)SLQDST(ph)LS(ph)R_	MS(0.003)LQDS(0.059)T(0.953)LS(0.985)R	MS(-29.55)LQDS(-13.21)T(13.21)LS(18.53)R	7	2	678.251	0.58882	614	1083	7	7	3241	3460	42650;42651;42652	15383	42650	15383	5804	42650	15383	5804	42650	15383
NaN	NaN	NaN	NaN	NaN	22.8103			___2	NaN	NaN	NaN	0	0	0.977625	>sp|Q8N715|CA065_HUMAN Uncharacterized protein C1orf65 OS=Homo sapiens GN=C1orf65 PE=2 SV=2	12	____MAGFSHFSQPPYRDLWEPPRPGGERES	0.977625	16.4009	2	Y	X;X;X;X;Oxidation (M);X;X;X;Phospho (STY);X;X;X;X;X;X;Phospho (STY);X;X;X;X;X;X;X;X;X;X;X;X;X;X;X	XXXXPPPPPPPPPPPPPXXXXXXXXXXXXXX	0.00747932	57.802	57.802	_(ac)M(ox)AGFS(ph)HFSQPPY(ph)R_	MAGFS(0.999)HFS(0.023)QPPY(0.978)R	MAGFS(31.26)HFS(-16.4)QPPY(16.4)R	12	2	871.825	-1.6628	787	834	12	12	3000	3170	40270	14781	40270	14781	6779	40270	14781	6779	40270	14781
NaN	NaN	NaN	NaN	NaN	17.626			___2	NaN	NaN	NaN	0	0	0.813447	>sp|Q9H611-3|PIF1_HUMAN Isoform 3 of ATP-dependent DNA helicase PIF1 OS=Homo sapiens GN=PIF1;>sp|Q9H611|PIF1_HUMAN ATP-dependent DNA helicase PIF1 OS=Homo sapiens GN=PIF1 PE=1 SV=2;>sp|Q9H611-2|PIF1_HUMAN Isoform 2 of ATP-dependent DNA helicase PIF1 OS=Homo sapiens GN=PIF1	12;12;12	____MLSGIEAAAGEYEDSELRCRVAVEELS	0.813447	6.31794	2	Y	X;X;X;X;Oxidation (M);X;X;X;X;X;X;X;X;X;X;Phospho (STY);X;X;Phospho (STY);X;X;X;X;X;X;X;X;X;X;X;X	XXXXPPPPPPPPPPPPPPPPPPXXXXXXXXX	0.0185806	31.876	31.876	_(ac)M(ox)LSGIEAAAGEY(ph)EDS(ph)ELR_	MLS(0.201)GIEAAAGEY(0.813)EDS(0.986)ELR	MLS(-6.32)GIEAAAGEY(6.32)EDS(17.46)ELR	12	3	720.281	1.125	810	1009	12	12	3169	3380	42173	15247	42173	15247	3477	42173	15247	3477	42173	15247
NaN	NaN	NaN	24.5524	23.021	20.9733			___2	NaN	NaN	NaN	0.980923	0	0	>sp|Q9UJ41|RABX5_HUMAN Rab5 GDP/GTP exchange factor OS=Homo sapiens GN=RABGEF1 PE=1 SV=2;>sp|Q9UJ41-3|RABX5_HUMAN Isoform 3 of Rab5 GDP/GTP exchange factor OS=Homo sapiens GN=RABGEF1;>tr|E7ERJ8|E7ERJ8_HUMAN BTB/POZ domain-containing protein KCTD7 OS=Homo sapiens GN=KCTD7 PE=2 SV=1;>tr|B4DZM7|B4DZM7_HUMAN Rab5 GDP/GTP exchange factor OS=Homo sapiens GN=RABGEF1 PE=2 SV=1;>tr|E9PFK9|E9PFK9_HUMAN Rab…	601;424;424;398;397;384	LDAQSLNLSQEDFDRYMSGQTSPRKQEAESW	0.980923	16.8048	2	Y	X;X;X;X;X;X;X;X;X;X;X;X;X;X;X;Phospho (STY);Oxidation (M);X;X;X;Phospho (STY);X;X;X;X;X;X;X;X;X;X	XXXXXXXXXXXXXXXPPPPPPPPPXXXXXXX	0.0360678	42.743	42.743	_Y(ph)M(ox)SGQT(ph)SPR_	Y(0.981)MS(0.099)GQT(0.46)S(0.46)PR	Y(16.8)MS(-7.52)GQT(0)S(0)PR	1	2	601.701	-1.2133	825	1107	601	601	5135	5489	66049;66050;66051;66052;66053;66054	22628	66049	22628	7345	66049	22628	7345	66049	22628
NaN	NaN	NaN	23.977	27.534	18.9715			___2	NaN	NaN	NaN	1	1	0	>sp|Q9Y2Q0|AT8A1_HUMAN Probable phospholipid-transporting ATPase IA OS=Homo sapiens GN=ATP8A1 PE=1 SV=1;>sp|Q9Y2Q0-2|AT8A1_HUMAN Isoform 2 of Probable phospholipid-transporting ATPase IA OS=Homo sapiens GN=ATP8A1;>sp|Q9Y2Q0-3|AT8A1_HUMAN Isoform 3 of Probable phospholipid-transporting ATPase IA OS=Homo sapiens GN=ATP8A1	541;526;526	TPDSVIIDSLGQEERYELLNVLEFTSARKRM	1	78.5179	2	Y	X;X;X;X;X;X;X;X;X;X;X;X;X;X;X;Phospho (STY);X;X;X;X;X;X;X;X;Phospho (STY);Phospho (STY);X;X;X;X;X	XXXXXXXXXXXXXXXPPPPPPPPPPPPPPXX	0.00066286	123.28	113.69	_Y(ph)ELLNVLEFTS(ph)ARK_	Y(1)ELLNVLEFT(0.028)S(0.972)ARK	Y(78.52)ELLNVLEFT(-15.36)S(15.36)ARK	1	2	921.926	1.1983	834	1152	541	541	5063	5414	65438;65439;65440;65441;65442;65443;65444;65445;65446;65447;65448;65449;65450;65451;65452;65453;65454;65455;65456;65457;65458	22436;22437;22438;22439;22440;22441;22442	65443	22441	5817	65442	22440	16054	65442	22440
NaN	NaN	NaN	21.8635	21.7933	22.0911			___3	NaN	NaN	NaN	1	0	0	>sp|O95602|RPA1_HUMAN DNA-directed RNA polymerase I subunit RPA1 OS=Homo sapiens GN=POLR1A PE=1 SV=2;>tr|B9ZVN9|B9ZVN9_HUMAN DNA-directed RNA polymerase OS=Homo sapiens GN=POLR1A PE=2 SV=1	1560;1499	VSLAHGAVIYATKGITRCLLNETTNNKNEKE	1	65.1047	3	T	X;X;X;X;X;X;X;X;X;X;X;X;X;X;X;Phospho (STY);X;X;X;X;X;X;Phospho (STY);Phospho (STY);X;X;X;X;X;X;X	XXXXXXXXXXXXXPPPPPPPPPPPPPPXXXX	0.029799	65.105	65.105	_GIT(ph)RCLLNET(ph)T(ph)NNK_	GIT(1)RCLLNET(1)T(1)NNK	GIT(65.1)RCLLNET(65.1)T(65.1)NNK	3	3	625.249	-2.7163	416	139	1560	1560	1554	1644	21402;21403;21404;21405;21406;21407	8797	21402	8797	2278	21402	8797	2278	21402	8797
NaN	NaN	NaN	21.8635	21.7933	22.0911			___3	NaN	NaN	NaN	1	0	0	>sp|O95602|RPA1_HUMAN DNA-directed RNA polymerase I subunit RPA1 OS=Homo sapiens GN=POLR1A PE=1 SV=2;>tr|B9ZVN9|B9ZVN9_HUMAN DNA-directed RNA polymerase OS=Homo sapiens GN=POLR1A PE=2 SV=1	1567;1506	VIYATKGITRCLLNETTNNKNEKELVLNTEG	1	65.1047	3	T	X;X;X;X;X;X;X;X;Phospho (STY);X;X;X;X;X;X;Phospho (STY);Phospho (STY);X;X;X;X;X;X;X;X;X;X;X;X;X;X	XXXXXXPPPPPPPPPPPPPPXXXXXXXXXXX	0.029799	65.105	65.105	_GIT(ph)RCLLNET(ph)T(ph)NNK_	GIT(1)RCLLNET(1)T(1)NNK	GIT(65.1)RCLLNET(65.1)T(65.1)NNK	10	3	625.249	-2.7163	417	139	1567	1567	1554	1644	21402;21403;21404;21405;21406;21407	8797	21402	8797	2278	21402	8797	2278	21402	8797
NaN	NaN	NaN	21.8635	21.7933	22.0911			___3	NaN	NaN	NaN	1	0	0	>sp|O95602|RPA1_HUMAN DNA-directed RNA polymerase I subunit RPA1 OS=Homo sapiens GN=POLR1A PE=1 SV=2;>tr|B9ZVN9|B9ZVN9_HUMAN DNA-directed RNA polymerase OS=Homo sapiens GN=POLR1A PE=2 SV=1	1568;1507	IYATKGITRCLLNETTNNKNEKELVLNTEGI	1	65.1047	3	T	X;X;X;X;X;X;X;Phospho (STY);X;X;X;X;X;X;Phospho (STY);Phospho (STY);X;X;X;X;X;X;X;X;X;X;X;X;X;X;X	XXXXXPPPPPPPPPPPPPPXXXXXXXXXXXX	0.029799	65.105	65.105	_GIT(ph)RCLLNET(ph)T(ph)NNK_	GIT(1)RCLLNET(1)T(1)NNK	GIT(65.1)RCLLNET(65.1)T(65.1)NNK	11	3	625.249	-2.7163	418	139	1568	1568	1554	1644	21402;21403;21404;21405;21406;21407	8797	21402	8797	2278	21402	8797	2278	21402	8797
NaN	NaN	NaN	22.8175	NaN	NaN			___3	NaN	NaN	NaN	0.774288	0	0	>sp|Q8WZ42-12|TITIN_HUMAN Isoform 12 of Titin OS=Homo sapiens GN=TTN;>sp|Q8WZ42-13|TITIN_HUMAN Isoform 13 of Titin OS=Homo sapiens GN=TTN;>sp|Q8WZ42-8|TITIN_HUMAN Isoform 8 of Titin OS=Homo sapiens GN=TTN;>sp|Q8WZ42|TITIN_HUMAN Titin OS=Homo sapiens GN=TTN PE=1 SV=4;>sp|Q8WZ42-2|TITIN_HUMAN Isoform 2 of Titin OS=Homo sapiens GN=TTN;>sp|Q8WZ42-7|TITIN_HUMAN Isoform 7 of Titin OS=Homo sapiens GN=TT…	907;907;907;907;815;907;907;907;907;861;861;861;907	SEAGVEVKKEVGVSITGTTVREERFEVLHGR	0.774288	5.04093	3	T	X;X;X;X;X;X;X;X;X;X;X;X;X;X;X;Phospho (STY);X;Phospho (STY);Phospho (STY);X;X;X;X;X;X;X;X;X;X;X;X	XXXXXXXXPPPPPPPPPPPPPXXXXXXXXXX	0.0433025	32.567	32.567	_KEVGVSIT(ph)GT(ph)T(ph)VR_	KEVGVS(0.279)IT(0.774)GT(0.974)T(0.972)VR	KEVGVS(-5.04)IT(5.04)GT(14.48)T(14.1)VR	8	2	793.835	1.2439	534	872	907	907	2264	2392	30990	11987	30990	11987	4709	30990	11987	4709	30990	11987
NaN	NaN	NaN	22.8175	NaN	NaN			___3	NaN	NaN	NaN	0.974297	0	0	>sp|Q8WZ42-12|TITIN_HUMAN Isoform 12 of Titin OS=Homo sapiens GN=TTN;>sp|Q8WZ42-13|TITIN_HUMAN Isoform 13 of Titin OS=Homo sapiens GN=TTN;>sp|Q8WZ42-8|TITIN_HUMAN Isoform 8 of Titin OS=Homo sapiens GN=TTN;>sp|Q8WZ42|TITIN_HUMAN Titin OS=Homo sapiens GN=TTN PE=1 SV=4;>sp|Q8WZ42-2|TITIN_HUMAN Isoform 2 of Titin OS=Homo sapiens GN=TTN;>sp|Q8WZ42-7|TITIN_HUMAN Isoform 7 of Titin OS=Homo sapiens GN=TT…	909;909;909;909;817;909;909;909;909;863;863;863;909	AGVEVKKEVGVSITGTTVREERFEVLHGREA	0.974297	14.4766	3	T	X;X;X;X;X;X;X;X;X;X;X;X;X;Phospho (STY);X;Phospho (STY);Phospho (STY);X;X;X;X;X;X;X;X;X;X;X;X;X;X	XXXXXXPPPPPPPPPPPPPXXXXXXXXXXXX	0.0433025	32.567	32.567	_KEVGVSIT(ph)GT(ph)T(ph)VR_	KEVGVS(0.279)IT(0.774)GT(0.974)T(0.972)VR	KEVGVS(-5.04)IT(5.04)GT(14.48)T(14.1)VR	10	2	793.835	1.2439	535	872	909	909	2264	2392	30990	11987	30990	11987	4709	30990	11987	4709	30990	11987
NaN	NaN	NaN	22.8175	NaN	NaN			___3	NaN	NaN	NaN	0.97194	0	0	>sp|Q8WZ42-12|TITIN_HUMAN Isoform 12 of Titin OS=Homo sapiens GN=TTN;>sp|Q8WZ42-13|TITIN_HUMAN Isoform 13 of Titin OS=Homo sapiens GN=TTN;>sp|Q8WZ42-8|TITIN_HUMAN Isoform 8 of Titin OS=Homo sapiens GN=TTN;>sp|Q8WZ42|TITIN_HUMAN Titin OS=Homo sapiens GN=TTN PE=1 SV=4;>sp|Q8WZ42-2|TITIN_HUMAN Isoform 2 of Titin OS=Homo sapiens GN=TTN;>sp|Q8WZ42-7|TITIN_HUMAN Isoform 7 of Titin OS=Homo sapiens GN=TT…	910;910;910;910;818;910;910;910;910;864;864;864;910	GVEVKKEVGVSITGTTVREERFEVLHGREAK	0.97194	14.0956	3	T	X;X;X;X;X;X;X;X;X;X;X;X;Phospho (STY);X;Phospho (STY);Phospho (STY);X;X;X;X;X;X;X;X;X;X;X;X;X;X;X	XXXXXPPPPPPPPPPPPPXXXXXXXXXXXXX	0.0433025	32.567	32.567	_KEVGVSIT(ph)GT(ph)T(ph)VR_	KEVGVS(0.279)IT(0.774)GT(0.974)T(0.972)VR	KEVGVS(-5.04)IT(5.04)GT(14.48)T(14.1)VR	11	2	793.835	1.2439	536	872	910	910	2264	2392	30990	11987	30990	11987	4709	30990	11987	4709	30990	11987
NaN	NaN	NaN	NaN	19.358	NaN			___3	NaN	NaN	NaN	0	0.994683	0	>tr|J3QSU1|J3QSU1_HUMAN Leucine-rich repeat-containing protein 37B OS=Homo sapiens GN=LRRC37B PE=2 SV=1;>sp|Q96QE4|LR37B_HUMAN Leucine-rich repeat-containing protein 37B OS=Homo sapiens GN=LRRC37B PE=2 SV=3;>tr|J3KTP0|J3KTP0_HUMAN Leucine-rich repeat-containing protein 37B OS=Homo sapiens GN=LRRC37B PE=2 SV=1;>tr|Q17RC9|Q17RC9_HUMAN LRRC37B protein OS=Homo sapiens GN=LRRC37B PE=2 SV=1;>tr|F5H5K1|…	709;682;643;631;600;694	TTVEDPYLFELPALKYLDMGTTHITLTTLKN	0.994683	20.9415	3	Y	X;X;X;X;X;X;X;X;X;X;X;X;X;X;X;Phospho (STY);X;X;Oxidation (M);X;X;Phospho (STY);X;X;Phospho (STY);X;X;X;X;X;X	XXXXXXXXXXXXXXXPPPPPPPPPPPPPPPX	0.0410583	39.237	39.237	_Y(ph)LDM(ox)GTT(ph)HIT(ph)LTTLK_	Y(0.995)LDMGT(0.514)T(0.531)HIT(0.69)LT(0.135)T(0.135)LK	Y(20.94)LDMGT(-0.23)T(0.23)HIT(6.69)LT(-7.85)T(-7.85)LK	1	2	982.4	2.0853	795	930	709	709	5118	5471	65932	22580	65932	22580	7571	65932	22580	7571	65932	22580
[truncated: 2 more columns]

## Sheet: Table S4
Table S4. List of all identified phosphopeptides in NEK1 IP-LC-MS/MS from cisplatin treated cells.
Intensity FLAG+1	Intensity FLAG+2	Intensity FLAG+3	Intensity NEK+1	Intensity NEK+2	Intensity NEK+3	Reverse	Contaminant	Multiplicity	Localization prob FLAG+1	Localization prob FLAG+2	Localization prob FLAG+3	Localization prob NEK+1	Localization prob NEK+2	Localization prob NEK+3	Proteins	Positions within proteins	Sequence window	Localization prob	Score diff	Diagnostic peak	Number of Phospho (STY)	Amino acid	Modification window	Peptide window coverage	PEP	Score	Score for localization	Modified sequence	Phospho (STY) Probabilities	Phospho (STY) Score diffs	Position in peptide	Charge	m/z	Mass error [ppm]	id	Protein group IDs	Positions	Position	Peptide IDs	Mod. peptide IDs	Evidence IDs	MS/MS IDs	Best localization evidence ID	Best localization MS/MS ID	Best localization raw file	Best localization scan number	Best score evidence ID	Best score MS/MS ID	Best score raw file
FLAG	FLAG	FLAG	NEK	NEK	NEK
NaN	NaN	NaN	NaN	20.5065	NaN			___1	NaN	NaN	NaN	0	1	0	>sp|P0CB48|UBFL6_HUMAN Putative upstream-binding factor 1-like protein 6 OS=Homo sapiens GN=UBTFL6 PE=5 SV=1	326	YAKGKNMAMMGGPAPSLKQTDPQSSSAKGLQ	1	36.3447		1	S	X;X;X;X;X;X;Oxidation (M);X;Oxidation (M);Oxidation (M);X;X;X;X;X;Phospho (STY);X;X;X;X;X;X;X;X;X;X;X;X;X;X;X	XXXXXPPPPPPPPPPPPPXXXXXXXXXXXXX	0.0386436	36.345	36.345	_NM(ox)AM(ox)M(ox)GGPAPS(ph)LK_	NMAMMGGPAPS(1)LK	NMAMMGGPAPS(36.34)LK	11	2	716.787	4.015	61	224	326	326	3426	3666	45018	15995	45018	15995	06mar_Diogo_NEK1_cpt_2	4187	45018	15995	06mar_Diogo_NEK1_cpt_2
NaN	NaN	NaN	23.3441	NaN	NaN			___1	NaN	NaN	NaN	0.977493	0	0	>tr|E7EQS8|E7EQS8_HUMAN Methylcytosine dioxygenase TET2 OS=Homo sapiens GN=TET2 PE=2 SV=1;>sp|Q6N021|TET2_HUMAN Methylcytosine dioxygenase TET2 OS=Homo sapiens GN=TET2 PE=1 SV=3;>sp|Q6N021-3|TET2_HUMAN Isoform 3 of Methylcytosine dioxygenase TET2 OS=Homo sapiens GN=TET2;>tr|E7EPB1|E7EPB1_HUMAN Methylcytosine dioxygenase TET2 OS=Homo sapiens GN=TET2 PE=2 SV=1;>sp|Q6N021-2|TET2_HUMAN Isoform 2 of M…	795;774;774;774;774	TFPHPQSNNDQQREGSFFGQTKVEECFHGEN	0.977493	16.3779		1	S	X;X;X;X;X;X;X;X;X;X;X;X;X;X;X;Phospho (STY);X;X;X;X;X;X;X;X;X;X;X;X;X;X;X	XXXXXXXXXXXXXPPPPPPPPPXXXXXXXXX	0.044338	33.89	33.89	_EGS(ph)FFGQTK_	EGS(0.977)FFGQT(0.023)K	EGS(16.38)FFGQT(-16.38)K	3	3	360.818	-2.0849	141	743	795	795	927	985	11642	3948	11642	3948	06mar_Diogo_NEK1_cpt_1	2742	11642	3948	06mar_Diogo_NEK1_cpt_1
NaN	NaN	NaN	NaN	NaN	20.0546			___1	NaN	NaN	NaN	0	0	0.999752	>sp|Q8TCG1|CIP2A_HUMAN Protein CIP2A OS=Homo sapiens GN=KIAA1524 PE=1 SV=2;>sp|Q8TCG1-2|CIP2A_HUMAN Isoform 2 of Protein CIP2A OS=Homo sapiens GN=KIAA1524	882;723	KESLVKLQQEELNKHSHMIAMIHSLSGGKIN	0.999973	45.9226		1	S	X;X;X;X;X;X;X;X;X;X;X;X;X;X;X;Phospho (STY);X;X;X;X;X;X;X;X;X;X;X;X;X;X;X	XXXXXXXXXXXXXXPPPPPPPPPPPPPPPXX	0.0221785	85.457	80.96	_HS(ph)HMIAMIHSLSGGK_	HS(1)HMIAMIHSLSGGK	HS(45.92)HMIAMIHS(-45.92)LS(-57.13)GGK	2	2	843.386	-0.83457	184	856	882	882	1852	1956	25546;25547	10221;10222	25546	10221	06mar_Diogo_NEK1-1	10614	25547	10222	08mar_Diogo_NEK1_cpt3_rep
NaN	NaN	NaN	27.7687	26.5972	NaN			___1	NaN	NaN	NaN	0.998713	0.988235	0	>sp|Q96PY6|NEK1_HUMAN Serine/threonine-protein kinase Nek1 OS=Homo sapiens GN=NEK1 PE=1 SV=2;>sp|Q96PY6-3|NEK1_HUMAN Isoform 3 of Serine/threonine-protein kinase Nek1 OS=Homo sapiens GN=NEK1;>sp|Q96PY6-2|NEK1_HUMAN Isoform 2 of Serine/threonine-protein kinase Nek1 OS=Homo sapiens GN=NEK1;>sp|Q96PY6-6|NEK1_HUMAN Isoform 6 of Serine/threonine-protein kinase Nek1 OS=Homo sapiens GN=NEK1;>sp|Q96PY6-4…	428;428;428;428;403;428	LSAGGSGEVKAPFLGSGGTIAPSSFSSRGQY	0.999892	39.6642		1	S	X;Phospho (STY);X;X;X;Phospho (STY);X;X;X;X;X;X;X;X;X;Phospho (STY);X;X;X;X;X;X;X;X;X;X;X;X;X;X;X	XXXXXXXXXXPPPPPPPPPPPPPPPPPPXXX	1.92772e-91	195.53	195.53	_APFLGS(ph)GGTIAPSSFSSR_	APFLGS(1)GGTIAPSSFSSR	APFLGS(39.66)GGT(-39.66)IAPS(-120.3)S(-131.82)FS(-131.82)S(-131.82)R	6	2	909.925	-0.64796	204	926	428	428	351	371	4909;4910;4911;4912;4913;4914;4915;4916	1943;1944;1945;1946	4910	1944	06mar_Diogo_NEK1-2	7606	4910	1944	06mar_Diogo_NEK1-2
NaN	NaN	NaN	27.2078	26.6705	26.5545			___1	NaN	NaN	NaN	0.999455	0.996468	0.997649	>sp|Q96PY6|NEK1_HUMAN Serine/threonine-protein kinase Nek1 OS=Homo sapiens GN=NEK1 PE=1 SV=2;>sp|Q96PY6-3|NEK1_HUMAN Isoform 3 of Serine/threonine-protein kinase Nek1 OS=Homo sapiens GN=NEK1;>sp|Q96PY6-2|NEK1_HUMAN Isoform 2 of Serine/threonine-protein kinase Nek1 OS=Homo sapiens GN=NEK1;>sp|Q96PY6-6|NEK1_HUMAN Isoform 6 of Serine/threonine-protein kinase Nek1 OS=Homo sapiens GN=NEK1;>sp|Q96PY6-4…	806;834;762;790;737	IKLGPNGSPRRAWGKSPTDSVLKILGEAELQ	0.999455	32.639		1	S	X;X;X;X;X;X;X;X;X;X;X;X;X;X;X;Phospho (STY);X;X;X;X;X;X;X;X;X;X;X;X;X;X;X	XXXXXXXXXXPPPPPPPPPPPPPXXXXXXXX	8.09127e-08	163.99	163.99	_AWGKS(ph)PTDSVLK_	AWGKS(0.999)PT(0.001)DSVLK	AWGKS(32.64)PT(-32.64)DS(-62.67)VLK	5	2	684.832	1.0072	205	926	806	806	509;3736	537;3995	6976;6977;6978;6979;6980;6981;6982;48896;48897;48898	2477;2478;2479;2480;17313	6977	2478	06mar_Diogo_NEK1_cpt_1	4368	6977	2478	06mar_Diogo_NEK1_cpt_1
NaN	NaN	NaN	25.2784	20.3143	19.2685			___1	NaN	NaN	NaN	0.786152	0	0.947775	>sp|Q96PY6|NEK1_HUMAN Serine/threonine-protein kinase Nek1 OS=Homo sapiens GN=NEK1 PE=1 SV=2;>sp|Q96PY6-3|NEK1_HUMAN Isoform 3 of Serine/threonine-protein kinase Nek1 OS=Homo sapiens GN=NEK1;>sp|Q96PY6-2|NEK1_HUMAN Isoform 2 of Serine/threonine-protein kinase Nek1 OS=Homo sapiens GN=NEK1;>sp|Q96PY6-6|NEK1_HUMAN Isoform 6 of Serine/threonine-protein kinase Nek1 OS=Homo sapiens GN=NEK1;>sp|Q96PY6-4…	1092;1120;1048;1076;1023	LEIDEIEDENIKEGPSDSEDIVFEETDTDLQ	0.947775	12.5995		1	S	X;X;X;X;X;X;X;X;X;X;X;X;X;X;X;Phospho (STY);X;X;X;X;X;X;X;X;X;X;X;X;X;X;X	XXXXXXXXXXXXPPPPPPPPPPPPPPPPPPP	5.50072e-15	112.05	87.792	_EGPS(ph)DSEDIVFEETDTDLQELQASM(ox)EQLLR_	EGPS(0.948)DS(0.052)EDIVFEETDTDLQELQASMEQLLR	EGPS(12.6)DS(-12.6)EDIVFEET(-41.89)DT(-41.1)DLQELQAS(-71.69)MEQLLR	4	3	1174.18	-0.10879	206	926	1092	1092	923	980	11532;11533;11534;11535;11538;11539;11541;11543;11544;11546;11547;11550	3879;3880;3881;3882;3883;3884;3885;3886;3889;3890;3891;3894	11541	3894	08mar_Diogo_NEK1_cpt3_rep	11400	11539	3890	06mar_Diogo_NEK1_cpt_1
NaN	NaN	NaN	19.0026	24.7928	NaN			___1	NaN	NaN	NaN	0	0.535671	0	>sp|Q96PY6|NEK1_HUMAN Serine/threonine-protein kinase Nek1 OS=Homo sapiens GN=NEK1 PE=1 SV=2;>sp|Q96PY6-3|NEK1_HUMAN Isoform 3 of Serine/threonine-protein kinase Nek1 OS=Homo sapiens GN=NEK1;>sp|Q96PY6-2|NEK1_HUMAN Isoform 2 of Serine/threonine-protein kinase Nek1 OS=Homo sapiens GN=NEK1;>sp|Q96PY6-6|NEK1_HUMAN Isoform 6 of Serine/threonine-protein kinase Nek1 OS=Homo sapiens GN=NEK1;>sp|Q96PY6-4…	1094;1122;1050;1078;1025	IDEIEDENIKEGPSDSEDIVFEETDTDLQEL	0.78111	5.58543		1	S	X;X;X;X;X;X;X;X;X;X;X;X;X;X;X;Phospho (STY);X;X;X;X;X;X;X;X;X;X;X;X;X;X;X	XXXXXXXXXXPPPPPPPPPPPPPPPPPPPPP	0.000104522	74.494	68.543	_EGPSDS(ph)EDIVFEETDTDLQELQASM(ox)EQLLR_	EGPS(0.216)DS(0.781)EDIVFEET(0.003)DT(0.001)DLQELQASMEQLLR	EGPS(-5.59)DS(5.59)EDIVFEET(-24.93)DT(-31.78)DLQELQAS(-55.18)MEQLLR	6	3	1174.18	-0.20829	207	926	1094	1094	923	980	11536;11537;11540;11542;11545;11548	3887;3888;3892;3893	11536	3887	06mar_Diogo_NEK1-2	15037	11540	3893	06mar_Diogo_NEK1_cpt_2
NaN	NaN	NaN	30.7729	30.1498	30.2533			___1	NaN	NaN	NaN	0.99943	0.997687	0.991625	>sp|Q96PY6|NEK1_HUMAN Serine/threonine-protein kinase Nek1 OS=Homo sapiens GN=NEK1 PE=1 SV=2;>sp|Q96PY6-3|NEK1_HUMAN Isoform 3 of Serine/threonine-protein kinase Nek1 OS=Homo sapiens GN=NEK1;>sp|Q96PY6-2|NEK1_HUMAN Isoform 2 of Serine/threonine-protein kinase Nek1 OS=Homo sapiens GN=NEK1;>sp|Q96PY6-6|NEK1_HUMAN Isoform 6 of Serine/threonine-protein kinase Nek1 OS=Homo sapiens GN=NEK1;>sp|Q96PY6-4…	664;692;620;648;595	SSDVSPPLGQHETGGSPSKQQMRSVISVTSA	0.99943	32.4469		1;2	S	Phospho (STY);X;X;X;Phospho (STY);X;X;X;X;X;X;X;X;X;X;Phospho (STY);X;X;X;X;X;Oxidation (M);X;X;X;X;X;X;X;X;X	PPPPPPPPPPPPPPPPPPPPPPPXXXXXXXX	8.67772e-46	205.63	205.63	_SSDVSPPLGQHETGGS(ph)PSK_	SSDVSPPLGQHETGGS(0.999)PS(0.001)K	S(-141.76)S(-141.76)DVS(-101.45)PPLGQHET(-60.68)GGS(32.45)PS(-32.45)K	16	2	973.928	0.41675	212	926	664	664	1715;4116;4117	1812;4409;4410;4411	23223;54138;54139;54140;54141;54142;54143;54144;54145;54146;54147;54148;54150;54151	9432;18930;18931;18932;18933;18934;18935;18936;18937;18938;18939	54140	18933	06mar_Diogo_NEK1_cpt_1	3299	54140	18933	06mar_Diogo_NEK1_cpt_1
NaN	NaN	NaN	27.4066	27.9669	26.5503			___1	NaN	NaN	NaN	0.97311	0.999989	0.999998	>sp|Q96PY6|NEK1_HUMAN Serine/threonine-protein kinase Nek1 OS=Homo sapiens GN=NEK1 PE=1 SV=2;>sp|Q96PY6-3|NEK1_HUMAN Isoform 3 of Serine/threonine-protein kinase Nek1 OS=Homo sapiens GN=NEK1;>sp|Q96PY6-2|NEK1_HUMAN Isoform 2 of Serine/threonine-protein kinase Nek1 OS=Homo sapiens GN=NEK1;>sp|Q96PY6-6|NEK1_HUMAN Isoform 6 of Serine/threonine-protein kinase Nek1 OS=Homo sapiens GN=NEK1;>sp|Q96PY6-4…	868;896;824;852;799	VQCISHEINPSAIVDSPVETKSPEFSEASPQ	0.999998	57.4832		1	S	X;X;X;X;X;X;X;X;X;X;X;X;X;X;X;Phospho (STY);X;X;X;X;X;Phospho (STY);X;X;X;X;X;X;Phospho (STY);X;X	PPPPPPPPPPPPPPPPPPPPPXXXXXXXXXX	4.84682e-59	209.62	209.62	_VQCISHEINPSAIVDS(ph)PVETK_	VQCISHEINPSAIVDS(1)PVETK	VQCIS(-171.05)HEINPS(-85.76)AIVDS(57.48)PVET(-57.48)K	16	2	1202.07	-0.27641	215	926	868	868	2395;2396;4900;4901	2529;2530;5241;5243	32194;32195;32198;32199;32200;32201;32202;32203;32204;32205;32206;32207;32208;32209;32210;32211;32212;63523;63525;63526;63527;63528;63529;63530;63531;63532;63533;63534;63535;63536;63537;63538;63540;63541;63542;63543;63544;63545	12371;12372;12375;12376;12377;12378;12379;21849;21850;21852;21853;21854;21855;21856;21857;21858;21859;21860;21861;21862;21863;21864;21865	63533	21862	08mar_Diogo_NEK1_cpt3_rep	5974	63533	21862	08mar_Diogo_NEK1_cpt3_rep
NaN	NaN	NaN	24.9137	29.4338	23.085			___1	NaN	NaN	NaN	1	0.998942	0	>sp|Q96PY6|NEK1_HUMAN Serine/threonine-protein kinase Nek1 OS=Homo sapiens GN=NEK1 PE=1 SV=2;>sp|Q96PY6-3|NEK1_HUMAN Isoform 3 of Serine/threonine-protein kinase Nek1 OS=Homo sapiens GN=NEK1;>sp|Q96PY6-2|NEK1_HUMAN Isoform 2 of Serine/threonine-protein kinase Nek1 OS=Homo sapiens GN=NEK1;>sp|Q96PY6-6|NEK1_HUMAN Isoform 6 of Serine/threonine-protein kinase Nek1 OS=Homo sapiens GN=NEK1;>sp|Q96PY6-4…	874;902;830;858;805	EINPSAIVDSPVETKSPEFSEASPQMSLKLE	1	69.531		1;2	S	X;X;X;X;Phospho (STY);X;X;X;X;Phospho (STY);X;X;X;X;X;Phospho (STY);X;X;X;X;X;X;Phospho (STY);X;X;Oxidation (M);X;X;X;X;X	PPPPPPPPPPPPPPPPPPPPPPPPPPPPPXX	3.24587e-14	159.13	152.94	_S(ph)PEFSEASPQM(ox)SLK_	S(1)PEFSEASPQMSLK	S(69.53)PEFS(-69.53)EAS(-88.66)PQMS(-114.71)LK	1	2	817.344	-0.77553	216	926	874	874	2396;4068;4901	2530;4358;4359;5243	32214;32216;32217;32218;32219;53533;53535;53538;53540;53542;53543;53544;53545;53546;53547	12381;18693;18694;18696;18697;18698;18701;18703;18704;18705	53533	18694	06mar_Diogo_NEK1-1	4846	53535	18697	06mar_Diogo_NEK1-3
NaN	NaN	NaN	29.8902	NaN	29.4245			___1	NaN	NaN	NaN	0.999767	0	0.658476	>sp|Q96PY6|NEK1_HUMAN Serine/threonine-protein kinase Nek1 OS=Homo sapiens GN=NEK1 PE=1 SV=2;>sp|Q96PY6-3|NEK1_HUMAN Isoform 3 of Serine/threonine-protein kinase Nek1 OS=Homo sapiens GN=NEK1;>sp|Q96PY6-2|NEK1_HUMAN Isoform 2 of Serine/threonine-protein kinase Nek1 OS=Homo sapiens GN=NEK1;>sp|Q96PY6-6|NEK1_HUMAN Isoform 6 of Serine/threonine-protein kinase Nek1 OS=Homo sapiens GN=NEK1;>sp|Q96PY6-4…	881;909;837;865;812	VDSPVETKSPEFSEASPQMSLKLEGNLEEPD	0.999767	39.5618		1;2	S	X;X;Phospho (STY);X;X;X;X;X;Phospho (STY);X;X;X;X;X;X;Phospho (STY);X;X;Oxidation (M);X;X;X;X;X;X;X;X;X;X;X;X	XXXXXXXXPPPPPPPPPPPPPPXXXXXXXXX	8.44277e-05	129.05	119.08	_SPEFSEAS(ph)PQM(ox)SLK_	SPEFSEAS(1)PQMSLK	S(-45.91)PEFS(-39.56)EAS(39.56)PQMS(-40.13)LK	8	2	817.344	0.11418	218	926	881	881	2396;4068;4901	2530;4358;4359;5243	53534;53536;53537;53539;53541;53542;53543;53544;53545;53546;53547	18695;18699;18700;18702;18703;18704;18705	53537	18700	06mar_Diogo_NEK1_cpt_1	4560	53534	18695	06mar_Diogo_NEK1-2
NaN	NaN	NaN	31.4469	27.7349	31.0309			___1	NaN	NaN	NaN	0.999903	0.997161	0	>sp|Q96PY6|NEK1_HUMAN Serine/threonine-protein kinase Nek1 OS=Homo sapiens GN=NEK1 PE=1 SV=2;>sp|Q96PY6-3|NEK1_HUMAN Isoform 3 of Serine/threonine-protein kinase Nek1 OS=Homo sapiens GN=NEK1;>sp|Q96PY6-2|NEK1_HUMAN Isoform 2 of Serine/threonine-protein kinase Nek1 OS=Homo sapiens GN=NEK1;>sp|Q96PY6-6|NEK1_HUMAN Isoform 6 of Serine/threonine-protein kinase Nek1 OS=Homo sapiens GN=NEK1;>sp|Q96PY6-4…	1052;1080;1008;1036;983	TGLFDANNPKMLRTCSLPDLSKLFRTLMDVP	0.999999	62.1624		1;2	S	X;X;X;X;X;X;X;X;X;X;Oxidation (M);X;X;Phospho (STY);X;Phospho (STY);X;X;X;X;X;X;X;X;X;X;X;Oxidation (M);X;X;X	XXXXXXXXXXPPPPPPPPPPPPXXXXXXXXX	0.00887511	125.97	104.26	_M(ox)LRT(ph)CS(ph)LPDLSK_	MLRT(1)CS(1)LPDLSK	MLRT(83.87)CS(62.16)LPDLS(-62.16)K	6	2	798.832	0.31793	219	926	1052	1052	3168;4275	3379;4574	42172;55905;55906;55907;55908;55909;55910;55911;55912;55913	15246;19497;19498	42172	15246	06mar_Diogo_NEK1-1	5303	55905	19497	06mar_Diogo_NEK1_cpt_1
NaN	NaN	NaN	24.3887	22.4243	21.0406			___1	NaN	NaN	NaN	1	1	1	>sp|Q96PY6|NEK1_HUMAN Serine/threonine-protein kinase Nek1 OS=Homo sapiens GN=NEK1 PE=1 SV=2;>sp|Q96PY6-3|NEK1_HUMAN Isoform 3 of Serine/threonine-protein kinase Nek1 OS=Homo sapiens GN=NEK1;>sp|Q96PY6-2|NEK1_HUMAN Isoform 2 of Serine/threonine-protein kinase Nek1 OS=Homo sapiens GN=NEK1;>sp|Q96PY6-6|NEK1_HUMAN Isoform 6 of Serine/threonine-protein kinase Nek1 OS=Homo sapiens GN=NEK1;>sp|Q96PY6-4…	1030;1058;986;1014;961	FRSHSHLPPKNKNKNSLLIGLSTGLFDANNP	1	117.01		1	S	X;X;X;X;X;X;X;X;X;X;X;X;X;X;X;Phospho (STY);X;X;X;X;X;X;X;X;X;X;X;X;X;X;X	XXXXXXXXXXXXPPPPPPPPPPPPPPPPPPP	3.72413e-92	238.63	212.94	_NKNS(ph)LLIGLSTGLFDANNPK_	NKNS(1)LLIGLSTGLFDANNPK	NKNS(117.01)LLIGLS(-117.01)T(-117.01)GLFDANNPK	4	2	1098.56	-0.62766	220	926	1030	1030	3398	3637	44576;44577;44578;44579;44580;44581;44582;44583;44584;44585;44586;44587	15892;15893;15894;15895;15896;15897;15898;15899	44583	15899	08mar_Diogo_NEK1_cpt3_rep	8979	44576	15892	06mar_Diogo_NEK1-1
NaN	NaN	NaN	25.7735	28.1955	27.7562			___1	NaN	NaN	NaN	0.999993	0	0	>sp|Q96PY6|NEK1_HUMAN Serine/threonine-protein kinase Nek1 OS=Homo sapiens GN=NEK1 PE=1 SV=2;>sp|Q96PY6-3|NEK1_HUMAN Isoform 3 of Serine/threonine-protein kinase Nek1 OS=Homo sapiens GN=NEK1;>sp|Q96PY6-2|NEK1_HUMAN Isoform 2 of Serine/threonine-protein kinase Nek1 OS=Homo sapiens GN=NEK1;>sp|Q96PY6-6|NEK1_HUMAN Isoform 6 of Serine/threonine-protein kinase Nek1 OS=Homo sapiens GN=NEK1;>sp|Q96PY6-5…	418;418;418;418;418	RAREQGWRNVLSAGGSGEVKAPFLGSGGTIA	1	68.6735		1	S	X;X;X;X;X;X;X;X;X;X;X;X;X;X;X;Phospho (STY);X;X;X;X;X;X;X;X;X;Phospho (STY);X;X;X;X;X	XXXXXXXXPPPPPPPPPPPPXXXXXXXXXXX	1.85399e-06	157.58	127.56	_NVLSAGGS(ph)GEVK_	NVLSAGGS(1)GEVK	NVLS(-68.67)AGGS(68.67)GEVK	8	2	599.279	-1.0899	222	926	418	418	3526	3777	46453;46454;46455;46456;46457;46458;46459;46460;46461;46462;46463;46464;46465;46466;46467;46468;46469;46470;46471;46472;46473;46474;46475;46476;46477;46478;46479;46480;46481;46482;46483;46484;46485;46486;46487;46488;46489	16618;16619;16620;16621;16622;16623;16624;16625;16626;16627;16628;16629;16630;16631;16632;16633;16634	46457	16622	06mar_Diogo_NEK1-1	13137	46467	16632	06mar_Diogo_NEK1-3
NaN	NaN	NaN	27.2732	24.6698	NaN			___1	NaN	NaN	NaN	0.915875	0	0	>sp|Q96PY6|NEK1_HUMAN Serine/threonine-protein kinase Nek1 OS=Homo sapiens GN=NEK1 PE=1 SV=2;>sp|Q96PY6-3|NEK1_HUMAN Isoform 3 of Serine/threonine-protein kinase Nek1 OS=Homo sapiens GN=NEK1;>sp|Q96PY6-2|NEK1_HUMAN Isoform 2 of Serine/threonine-protein kinase Nek1 OS=Homo sapiens GN=NEK1;>sp|Q96PY6-6|NEK1_HUMAN Isoform 6 of Serine/threonine-protein kinase Nek1 OS=Homo sapiens GN=NEK1;>sp|Q96PY6-4…	1008;1036;964;992;939	SEHLNLVPQVQSVQCSPEESFAFRSHSHLPP	0.996645	24.9719		1	S	X;X;X;X;X;X;X;X;X;X;X;X;X;X;X;Phospho (STY);X;X;X;X;X;X;X;X;X;X;X;X;X;X;X	PPPPPPPPPPPPPPPPPPPPPPPPXXXXXXX	0.00194328	83.317	83.317	_VVHSEHLNLVPQVQSVQCS(ph)PEESFAFR_	VVHSEHLNLVPQVQSVQCS(0.997)PEES(0.003)FAFR	VVHS(-63.66)EHLNLVPQVQS(-37.38)VQCS(24.97)PEES(-24.97)FAFR	19	3	1068.5	-0.16311	226	926	1008	1008	4978	5328	64546;64547;64548;64549;64550	22181;22182	64546	22181	06mar_Diogo_NEK1-1	7590	64546	22181	06mar_Diogo_NEK1-1
NaN	NaN	NaN	NaN	NaN	21.4783			___1	NaN	NaN	NaN	0	0	1	>tr|C9JJZ7|C9JJZ7_HUMAN Heterogeneous nuclear ribonucleoprotein L-like (Fragment) OS=Homo sapiens GN=HNRNPLL PE=2 SV=1	7	_________MQEAGGSHHKVSVSPVVHVRGL	1	80.0144		1	S	X;X;X;X;X;X;X;X;X;Oxidation (M);X;X;X;X;X;Phospho (STY);X;X;X;X;X;X;X;X;X;X;X;X;X;X;X	XXXXXXXXXPPPPPPPPPPXXXXXXXXXXXX	0.0129987	80.014	80.014	_(ac)M(ox)QEAGGS(ph)HHK_	MQEAGGS(1)HHK	MQEAGGS(80.01)HHK	7	2	610.232	-0.90441	333	1214	7	7	3214	3433	42531	15344	42531	15344	08mar_Diogo_NEK1_cpt3_rep	4078	42531	15344	08mar_Diogo_NEK1_cpt3_rep
NaN	NaN	NaN	NaN	19.9188	NaN			___1	NaN	NaN	NaN	0	1	0	>tr|C9JLG1|C9JLG1_HUMAN Zinc finger protein 40 (Fragment) OS=Homo sapiens GN=HIVEP1 PE=2 SV=1	3	_____________MLSWVPWRRVTGLHGVAL	1	38.2928		1	S	X;X;X;X;X;X;X;X;X;X;X;X;X;Oxidation (M);X;Phospho (STY);X;X;X;X;X;X;X;X;X;X;X;X;X;X;X	XXXXXXXXXXXXXPPPPPPPPPXXXXXXXXX	0.041911	38.293	38.293	_(ac)M(ox)LS(ph)WVPWRR_	MLS(1)WVPWRR	MLS(38.29)WVPWRR	3	3	456.881	-1.2322	334	1215	3	3	3170	3381	42174	15248	42174	15248	24abril_Diogo_C+_C2	2603	42174	15248	24abril_Diogo_C+_C2
NaN	NaN	NaN	NaN	NaN	20.3703			___1	NaN	NaN	NaN	0	0	0.788547	>sp|O75410-8|TACC1_HUMAN Isoform 8 of Transforming acidic coiled-coil-containing protein 1 OS=Homo sapiens GN=TACC1	11	_____MIEDEQRTSMTSQKSFQQLTMEKEQA	0.788547	5.88639		1	T	X;X;X;X;X;Oxidation (M);X;X;X;X;X;X;X;X;Oxidation (M);Phospho (STY);X;X;X;X;X;X;X;X;X;X;X;X;X;X;X	XXXXXPPPPPPPPPPPPPPXXXXXXXXXXXX	0.0386789	83.53	83.53	_M(ox)IEDEQRTSM(ox)T(ph)SQK_	MIEDEQRTS(0.008)MT(0.789)S(0.203)QK	MIEDEQRT(-60.7)S(-19.87)MT(5.89)S(-5.89)QK	11	2	898.366	-2.0581	404	100	11	11	3132	3333	41778	15151	41778	15151	08mar_Diogo_NEK1_cpt3_rep	6865	41778	15151	08mar_Diogo_NEK1_cpt3_rep
NaN	NaN	NaN	21.6788	22.4416	22.9967			___1	NaN	NaN	NaN	1	0	0	>sp|P13533|MYH6_HUMAN Myosin-6 OS=Homo sapiens GN=MYH6 PE=1 SV=5	853	IKPLLKSAETEKEMATMKEEFGRIKETLEKS	1	76.9272		1	T	X;X;X;X;X;X;X;X;X;X;X;X;X;Oxidation (M);X;Phospho (STY);Oxidation (M);X;X;X;X;X;X;X;X;X;X;X;X;X;X	XXXXXXXXXXXXPPPPPPPPPPPXXXXXXXX	0.0144442	76.927	76.927	_EM(ox)AT(ph)M(ox)KEEFGR_	EMAT(1)MKEEFGR	EMAT(76.93)MKEEFGR	4	2	720.78	1.5374	432	253	853	853	1032	1095	12739;12740;12741;12742;12743;12744	4308	12739	4308	06mar_Diogo_NEK1_cpt_1	2124	12739	4308	06mar_Diogo_NEK1_cpt_1
NaN	NaN	NaN	21.0944	NaN	19.573			___1	NaN	NaN	NaN	1	0	0	>sp|Q96PY6|NEK1_HUMAN Serine/threonine-protein kinase Nek1 OS=Homo sapiens GN=NEK1 PE=1 SV=2;>sp|Q96PY6-3|NEK1_HUMAN Isoform 3 of Serine/threonine-protein kinase Nek1 OS=Homo sapiens GN=NEK1;>sp|Q96PY6-2|NEK1_HUMAN Isoform 2 of Serine/threonine-protein kinase Nek1 OS=Homo sapiens GN=NEK1;>sp|Q96PY6-6|NEK1_HUMAN Isoform 6 of Serine/threonine-protein kinase Nek1 OS=Homo sapiens GN=NEK1;>sp|Q96PY6-4…	141;141;141;141;141;141	HRDIKSQNIFLTKDGTVQLGDFGIARVLNST	1	93.7676		1	T	X;X;X;X;X;X;X;X;X;X;X;X;X;X;X;Phospho (STY);X;X;X;X;X;X;X;X;X;X;X;X;X;X;Phospho (STY)	XXXXXXXXXXXXXPPPPPPPPPPPPPXXXXX	0.013477	117.18	93.768	_DGT(ph)VQLGDFGIAR_	DGT(1)VQLGDFGIAR	DGT(93.77)VQLGDFGIAR	3	2	714.83	0.81494	551	926	141	141	602	635	8075;8076;8077;8078;8079	2870;2871	8076	2871	06mar_Diogo_NEK1_cpt_1	7755	8075	2870	06mar_Diogo_NEK1-2
NaN	NaN	NaN	25.8663	NaN	NaN			___1	NaN	NaN	NaN	0.986839	0	0	>sp|Q96PY6|NEK1_HUMAN Serine/threonine-protein kinase Nek1 OS=Homo sapiens GN=NEK1 PE=1 SV=2;>sp|Q96PY6-3|NEK1_HUMAN Isoform 3 of Serine/threonine-protein kinase Nek1 OS=Homo sapiens GN=NEK1;>sp|Q96PY6-2|NEK1_HUMAN Isoform 2 of Serine/threonine-protein kinase Nek1 OS=Homo sapiens GN=NEK1;>sp|Q96PY6-6|NEK1_HUMAN Isoform 6 of Serine/threonine-protein kinase Nek1 OS=Homo sapiens GN=NEK1;>sp|Q96PY6-4…	156;156;156;156;156;156	TVQLGDFGIARVLNSTVELARTCIGTPYYLS	0.995119	23.0933		1	T	Phospho (STY);X;X;X;X;X;X;X;X;X;X;X;X;X;X;Phospho (STY);X;X;X;X;X;X;X;X;X;X;X;X;X;X;X	XXXXXXXXXXXPPPPPPPPPPXXXXXXXXXX	1.81481e-09	158.11	158.11	_VLNST(ph)VELAR_	VLNS(0.005)T(0.995)VELAR	VLNS(-23.09)T(23.09)VELAR	5	2	591.3	0.83015	554	926	156	156	4825	5159	62888;62889;62890	21673;21674;21675	62888	21673	06mar_Diogo_NEK1-1	4767	62888	21673	06mar_Diogo_NEK1-1
NaN	NaN	NaN	21.229	20.9624	20.8839			___1	NaN	NaN	NaN	0.948425	0.843342	0.756452	>sp|Q96Q42|ALS2_HUMAN Alsin OS=Homo sapiens GN=ALS2 PE=1 SV=2;>sp|Q96Q42-3|ALS2_HUMAN Isoform 3 of Alsin OS=Homo sapiens GN=ALS2	510;510	LLRKAARVKTRTVVLTPTYSGEADALLPSLR	0.991075	21.299		1	T	X;X;X;X;X;X;X;X;X;X;X;X;X;X;X;Phospho (STY);X;X;X;X;X;X;X;X;X;X;X;X;X;X;X	XXXXXXXXXXXPPPPPPPPPPPPPPPPPPPP	1.57344e-22	173.18	173.18	_TVVLT(ph)PTYSGEADALLPSLR_	T(0.001)VVLT(0.991)PT(0.007)YSGEADALLPSLR	T(-29.27)VVLT(21.3)PT(-21.3)Y(-60.44)S(-33.9)GEADALLPS(-154.45)LR	5	2	1092.05	1.2612	556	928	510	510	4567	4888	60120;60121;60122;60123;60124;60125	20858;20859;20860;20861;20862;20863	60121	20859	06mar_Diogo_NEK1-2	9229	60121	20859	06mar_Diogo_NEK1-2
NaN	NaN	NaN	20.58	NaN	20.7226			___1	NaN	NaN	NaN	0.78188	0	0	>sp|O15360|FANCA_HUMAN Fanconi anemia group A protein OS=Homo sapiens GN=FANCA PE=1 SV=2;>tr|H3BSR5|H3BSR5_HUMAN Fanconi anemia group A protein OS=Homo sapiens GN=FANCA PE=2 SV=1	510;510	HPPLVPGKYRSLLTDYISLAKTRLADLKVSI	0.78188	8.77903		1	Y	X;X;X;X;X;X;X;X;X;X;X;X;X;X;X;Phospho (STY);X;X;X;X;X;X;X;X;X;X;X;X;X;X;X	XXXXXXXXXXPPPPPPPPPPPPPXXXXXXXX	0.00662182	91.961	91.961	_SLLTDY(ph)ISLAKTR_	S(0.104)LLT(0.104)DY(0.782)IS(0.011)LAKTR	S(-8.78)LLT(-8.78)DY(8.78)IS(-18.53)LAKT(-76.45)R	6	2	780.905	-2.3627	716	47	510	510	4023	4310	52986;52987;52988;52989;52990;52991	18544	52986	18544	24abril_Diogo_C+_B1	2729	52986	18544	24abril_Diogo_C+_B1
NaN	NaN	NaN	NaN	NaN	24.3016			___1	NaN	NaN	NaN	0	0	1	>sp|P35241-5|RADI_HUMAN Isoform 5 of Radixin OS=Homo sapiens GN=RDX;>sp|P35241|RADI_HUMAN Radixin OS=Homo sapiens GN=RDX PE=1 SV=1;>sp|P35241-3|RADI_HUMAN Isoform 3 of Radixin OS=Homo sapiens GN=RDX;>tr|E9PNV3|E9PNV3_HUMAN Radixin (Fragment) OS=Homo sapiens GN=RDX PE=2 SV=1	146;146;114;135	QAKYGDYNKEIHKPGYLANDRLLPQRVLEQH	1	84.6051		1	Y	X;X;X;X;X;X;X;X;X;X;X;X;X;X;X;Phospho (STY);X;X;X;X;X;X;X;X;X;X;X;X;X;X;X	XXXXXXXXXXXXXPPPPPPPPPPPPPXXXXX	0.0429178	84.605	84.605	_PGY(ph)LANDRLLPQR_	PGY(1)LANDRLLPQR	PGY(84.61)LANDRLLPQR	3	2	796.901	2.0819	738	361	146	146	3573	3826	46931	16758	46931	16758	25abril_Diogo_C+_A3	4831	46931	16758	25abril_Diogo_C+_A3
NaN	NaN	NaN	25.7552	NaN	NaN			___1	NaN	NaN	NaN	0.996561	0	0	>tr|B4DR87|B4DR87_HUMAN Procollagen-lysine,2-oxoglutarate 5-dioxygenase 1 OS=Homo sapiens GN=PLOD1 PE=2 SV=1;>sp|Q02809|PLOD1_HUMAN Procollagen-lysine,2-oxoglutarate 5-dioxygenase 1 OS=Homo sapiens GN=PLOD1 PE=1 SV=2;>tr|Q5JXB7|Q5JXB7_HUMAN Procollagen-lysine,2-oxoglutarate 5-dioxygenase 1 (Fragment) OS=Homo sapiens GN=PLOD1 PE=2 SV=1;>tr|Q5JXB8|Q5JXB8_HUMAN Procollagen-lysine,2-oxoglutarate 5-di…	207;160;160;207;160	VSDGKRFLGSGGFIGYAPNLSKLVAEWEGQD	0.99692	25.5729		1	Y	X;X;X;X;X;X;X;X;X;X;X;X;X;X;X;Phospho (STY);X;X;X;X;X;X;X;X;X;X;X;X;X;X;X	XXXXXXPPPPPPPPPPPPPPPPXXXXXXXXX	0.00468419	88.282	88.282	_FLGSGGFIGY(ph)APNLSK_	FLGSGGFIGY(0.997)APNLS(0.003)K	FLGS(-34.98)GGFIGY(25.57)APNLS(-25.57)K	10	2	854.411	0.026677	747	540	207	207	1292	1373	16117;16118;16119	5578;5579	16117	5578	06mar_Diogo_NEK1-3	10477	16117	5578	06mar_Diogo_NEK1-3
NaN	NaN	NaN	NaN	NaN	20.2238			___1	NaN	NaN	NaN	0	0	1	>sp|Q9NZH7-2|IL36B_HUMAN Isoform 2 of Interleukin-36 beta OS=Homo sapiens GN=IL36B	95	GKPTLQLKEKNIMDLYVEKKAQKPFLFFHNK	1	69.2755		1	Y	X;X;X;X;X;X;X;X;X;X;X;X;Oxidation (M);X;X;Phospho (STY);X;X;X;X;X;X;X;X;X;X;X;X;X;X;X	XXXXXXXXXXPPPPPPPPPPXXXXXXXXXXX	0.0233041	69.275	69.275	_NIM(ox)DLY(ph)VEKK_	NIMDLY(1)VEKK	NIMDLY(69.28)VEKK	6	3	450.212	2.9478	817	1067	95	95	3383	3621	44274	15818	44274	15818	25abril_Diogo_C+_A3	1593	44274	15818	25abril_Diogo_C+_A3
NaN	NaN	NaN	NaN	NaN	25.5467			___1	NaN	NaN	NaN	0	0	0.999289	>sp|Q9ULL1|PKHG1_HUMAN Pleckstrin homology domain-containing family G member 1 OS=Homo sapiens GN=PLEKHG1 PE=1 SV=2	1178	YNSLGRKGISAKSQPYHRSQSSSSVLINKSM	0.999289	32.1935	+	1	Y	X;X;X;X;X;X;X;X;X;X;X;X;X;X;X;Phospho (STY);X;X;X;X;X;X;X;X;X;X;X;X;X;X;X	XXXXXXXPPPPPPPPPPPXXXXXXXXXXXXX	0.0223566	92.538	92.538	_GISAKSQPY(ph)HR_	GIS(0.001)AKSQPY(0.999)HR	GIS(-32.19)AKS(-39.65)QPY(32.19)HR	9	2	662.314	0.38188	829	1121	1178	1178	1549	1639	21373;21374	8790	21373	8790	25abril_Diogo_C+_D3	4360	21373	8790	25abril_Diogo_C+_D3
NaN	NaN	NaN	26.0944	25.1991	NaN			___1	NaN	NaN	NaN	0	0.999983	0	>sp|Q9Y383-2|LC7L2_HUMAN Isoform 2 of Putative RNA-binding protein Luc7-like 2 OS=Homo sapiens GN=LUC7L2	4	____________MPAYLNLQGSVRKAPHSPS	0.999983	47.7535	+	1	Y	X;X;X;X;X;X;X;X;X;X;X;X;Oxidation (M);X;X;Phospho (STY);X;X;X;X;X;X;X;X;X;X;X;X;X;X;X	XXXXXXXXXXXXPPPPPPPPPPPPXXXXXXX	0.0249782	53.237	53.237	_(ac)M(ox)PAY(ph)LNLQGSVR_	MPAY(1)LNLQGSVR	MPAY(47.75)LNLQGS(-47.75)VR	4	3	496.23	-1.4202	836	1159	4	4	3199	3414	42429;42430;42431;42432;42433;42434	15308	42429	15308	06mar_Diogo_NEK1_cpt_2	6588	42429	15308	06mar_Diogo_NEK1_cpt_2
NaN	NaN	NaN	19.7987	NaN	NaN			___2	NaN	NaN	NaN	0.981223	0	0	>sp|P42224|STAT1_HUMAN Signal transducer and activator of transcription 1-alpha/beta OS=Homo sapiens GN=STAT1 PE=1 SV=2;>sp|P42224-2|STAT1_HUMAN Isoform Beta of Signal transducer and activator of transcription 1-alpha/beta OS=Homo sapiens GN=STAT1;>tr|D2KFR9|D2KFR9_HUMAN Signal transducer and activator of transcription 1-alpha/beta OS=Homo sapiens GN=STAT1 PE=2 SV=1;>tr|E7EPD2|E7EPD2_HUMAN Signal…	2;2;2;2;2;2	______________MSQWYELQQLDSKFLEQ	0.981223	17.0745		2	S	X;X;X;X;X;X;X;X;X;X;X;X;X;X;Oxidation (M);Phospho (STY);X;X;X;X;X;X;X;X;X;Phospho (STY);X;X;X;X;X	XXXXXXXXXXXXXXPPPPPPPPPPPPPXXXX	0.0176816	34.768	34.768	_(ac)M(ox)S(ph)QWYELQQLDS(ph)K_	MS(0.981)QWY(0.043)ELQQLDS(0.976)K	MS(17.07)QWY(-16.04)ELQQLDS(16.04)K	2	2	937.359	2.4344	84	391	2	2	3244	3463	42662	15389	42662	15389	06mar_Diogo_NEK1_cpt_1	9560	42662	15389	06mar_Diogo_NEK1_cpt_1
NaN	NaN	NaN	19.7987	NaN	NaN			___2	NaN	NaN	NaN	0.97616	0	0	>sp|P42224|STAT1_HUMAN Signal transducer and activator of transcription 1-alpha/beta OS=Homo sapiens GN=STAT1 PE=1 SV=2;>sp|P42224-2|STAT1_HUMAN Isoform Beta of Signal transducer and activator of transcription 1-alpha/beta OS=Homo sapiens GN=STAT1;>tr|D2KFR9|D2KFR9_HUMAN Signal transducer and activator of transcription 1-alpha/beta OS=Homo sapiens GN=STAT1 PE=2 SV=1;>tr|E7EPD2|E7EPD2_HUMAN Signal…	12;12;12;12;12;12	____MSQWYELQQLDSKFLEQVHQLYDDSFP	0.97616	16.0378		2	S	X;X;X;X;Oxidation (M);Phospho (STY);X;X;X;X;X;X;X;X;X;Phospho (STY);X;X;X;X;X;X;X;X;X;X;X;X;X;X;X	XXXXPPPPPPPPPPPPPXXXXXXXXXXXXXX	0.0176816	34.768	34.768	_(ac)M(ox)S(ph)QWYELQQLDS(ph)K_	MS(0.981)QWY(0.043)ELQQLDS(0.976)K	MS(17.07)QWY(-16.04)ELQQLDS(16.04)K	12	2	937.359	2.4344	85	391	12	12	3244	3463	42662	15389	42662	15389	06mar_Diogo_NEK1_cpt_1	9560	42662	15389	06mar_Diogo_NEK1_cpt_1
NaN	NaN	NaN	NaN	22.4145	NaN			___2	NaN	NaN	NaN	0	0.973739	0	>sp|Q6UWL2-2|SUSD1_HUMAN Isoform 2 of Sushi domain-containing protein 1 OS=Homo sapiens GN=SUSD1;>sp|Q6UWL2|SUSD1_HUMAN Sushi domain-containing protein 1 OS=Homo sapiens GN=SUSD1 PE=1 SV=1;>sp|Q6UWL2-3|SUSD1_HUMAN Isoform 3 of Sushi domain-containing protein 1 OS=Homo sapiens GN=SUSD1;>tr|F8WAQ1|F8WAQ1_HUMAN Sushi domain-containing protein 1 OS=Homo sapiens GN=SUSD1 PE=2 SV=1;>tr|H3BLV4|H3BLV4_HU…	547;547;547;547;531	QKEFAQEMTFNISSSSRDPEVCLDLRPGTNY	0.973739	15.6947		2	S	X;X;X;X;X;X;X;Oxidation (M);X;X;X;X;Phospho (STY);X;X;Phospho (STY);X;X;X;X;X;X;X;X;X;X;X;X;X;X;X	XXPPPPPPPPPPPPPPPXXXXXXXXXXXXXX	0.00981597	69.148	69.148	_EFAQEM(ox)TFNIS(ph)SSS(ph)R_	EFAQEMTFNIS(0.342)S(0.342)S(0.342)S(0.974)R	EFAQEMT(-33.04)FNIS(0)S(0)S(0)S(15.69)R	14	2	955.357	1.626	150	760	547	547	887	943	11169;11170	3778	11169	3778	06mar_Diogo_NEK1_cpt_2	2059	11169	3778	06mar_Diogo_NEK1_cpt_2
NaN	NaN	NaN	NaN	NaN	22.6814			___2	NaN	NaN	NaN	0	0	0.976097	>sp|Q8NI08|NCOA7_HUMAN Nuclear receptor coactivator 7 OS=Homo sapiens GN=NCOA7 PE=1 SV=2;>sp|Q8NI08-2|NCOA7_HUMAN Isoform 2 of Nuclear receptor coactivator 7 OS=Homo sapiens GN=NCOA7;>sp|Q8NI08-7|NCOA7_HUMAN Isoform 7 of Nuclear receptor coactivator 7 OS=Homo sapiens GN=NCOA7;>tr|Q5JVL2|Q5JVL2_HUMAN Nuclear receptor coactivator 7 (Fragment) OS=Homo sapiens GN=NCOA7 PE=2 SV=1	345;334;230;143	KEKRQQNGEKIMTSDSRPIVPLEKSTGHTPT	0.976097	13.1001		2	S	X;X;X;X;X;X;X;X;X;X;X;X;Phospho (STY);X;X;Phospho (STY);X;X;X;X;X;X;X;X;X;X;X;X;X;X;X	XXXXPPPPPPPPPPPPPXXXXXXXXXXXXXX	0.00935173	90.697	90.697	_QQNGEKIMT(ph)SDS(ph)R_	QQNGEKIMT(0.512)S(0.512)DS(0.976)R	QQNGEKIMT(0)S(0)DS(13.1)R	12	2	827.321	-1.7011	183	852	345	345	3695	3952	48395;48396	17186	48395	17186	25abril_Diogo_C+_D3	4668	48395	17186	25abril_Diogo_C+_D3
NaN	NaN	NaN	19.5471	NaN	NaN			___2	NaN	NaN	NaN	0.999996	0	0	>sp|Q96II8-2|LRCH3_HUMAN Isoform 2 of Leucine-rich repeat and calponin homology domain-containing protein 3 OS=Homo sapiens GN=LRCH3;>sp|Q96II8|LRCH3_HUMAN Leucine-rich repeat and calponin homology domain-containing protein 3 OS=Homo sapiens GN=LRCH3 PE=1 SV=2;>tr|B4E0T7|B4E0T7_HUMAN Leucine-rich repeat and calponin homology domain-containing protein 3 OS=Homo sapiens GN=LRCH3 PE=2 SV=1;>tr|E9PD9…	707;707;655;553;302;182;144;85	ANHVRPRSVPSIHVPSPAVPKLTMAKCRRNV	0.999996	58.3126		2	S	X;X;X;X;X;X;X;X;X;X;X;X;X;X;X;Phospho (STY);X;X;X;X;X;X;Phospho (STY);Oxidation (M);X;X;X;X;X;X;X	XXXXXPPPPPPPPPPPPPPPPPPPPPXXXXX	0.0255496	75.682	75.682	_PRSVPSIHVPS(ph)PAVPKLT(ph)M(ox)AK_	PRSVPSIHVPS(1)PAVPKLT(1)MAK	PRS(-59.07)VPS(-58.31)IHVPS(58.31)PAVPKLT(60.71)MAK	11	2	1194.6	0.96993	198	913	707	707	3582	3835	46999	16773	46999	16773	06mar_Diogo_NEK1_cpt_1	9020	46999	16773	06mar_Diogo_NEK1_cpt_1
NaN	NaN	NaN	24.4945	23.4651	NaN			___2	NaN	NaN	NaN	0.994088	0.837121	0	>sp|Q96PY6|NEK1_HUMAN Serine/threonine-protein kinase Nek1 OS=Homo sapiens GN=NEK1 PE=1 SV=2;>sp|Q96PY6-3|NEK1_HUMAN Isoform 3 of Serine/threonine-protein kinase Nek1 OS=Homo sapiens GN=NEK1;>sp|Q96PY6-2|NEK1_HUMAN Isoform 2 of Serine/threonine-protein kinase Nek1 OS=Homo sapiens GN=NEK1;>sp|Q96PY6-6|NEK1_HUMAN Isoform 6 of Serine/threonine-protein kinase Nek1 OS=Homo sapiens GN=NEK1;>sp|Q96PY6-4…	653;681;609;637;584	WEEHLVAKGVKSSDVSPPLGQHETGGSPSKQ	0.994088	25.0544		2	S	X;X;X;X;X;X;X;X;X;X;X;X;X;X;X;Phospho (STY);X;X;X;X;X;X;X;X;X;X;Phospho (STY);X;Phospho (STY);X;X	XXXXXXXXXXXPPPPPPPPPPPPPPPPPPPX	0.000535501	109.42	109.42	_SSDVS(ph)PPLGQHETGGS(ph)PSK_	S(0.003)S(0.003)DVS(0.994)PPLGQHET(0.086)GGS(0.86)PS(0.054)K	S(-25.63)S(-25.05)DVS(25.05)PPLGQHET(-10.03)GGS(10.03)PS(-12.02)K	5	2	1013.91	0.030729	211	926	653	653	1715;4116;4117	1812;4409;4410;4411	54148;54149;54150;54151;54152	18939;18940	54148	18939	06mar_Diogo_NEK1_cpt_1	3761	54148	18939	06mar_Diogo_NEK1_cpt_1
NaN	NaN	NaN	24.377	NaN	NaN			___2	NaN	NaN	NaN	0.99943	0.997687	0.991625	>sp|Q96PY6|NEK1_HUMAN Serine/threonine-protein kinase Nek1 OS=Homo sapiens GN=NEK1 PE=1 SV=2;>sp|Q96PY6-3|NEK1_HUMAN Isoform 3 of Serine/threonine-protein kinase Nek1 OS=Homo sapiens GN=NEK1;>sp|Q96PY6-2|NEK1_HUMAN Isoform 2 of Serine/threonine-protein kinase Nek1 OS=Homo sapiens GN=NEK1;>sp|Q96PY6-6|NEK1_HUMAN Isoform 6 of Serine/threonine-protein kinase Nek1 OS=Homo sapiens GN=NEK1;>sp|Q96PY6-4…	664;692;620;648;595	SSDVSPPLGQHETGGSPSKQQMRSVISVTSA	0.99943	32.4469		1;2	S	Phospho (STY);X;X;X;Phospho (STY);X;X;X;X;X;X;X;X;X;X;Phospho (STY);X;X;X;X;X;Oxidation (M);X;X;X;X;X;X;X;X;X	PPPPPPPPPPPPPPPPPPPPPPPXXXXXXXX	8.67772e-46	205.63	205.63	_SSDVSPPLGQHETGGS(ph)PSK_	SSDVSPPLGQHETGGS(0.999)PS(0.001)K	S(-141.76)S(-141.76)DVS(-101.45)PPLGQHET(-60.68)GGS(32.45)PS(-32.45)K	16	2	973.928	0.41675	212	926	664	664	1715;4116;4117	1812;4409;4410;4411	23223;54138;54139;54140;54141;54142;54143;54144;54145;54146;54147;54148;54150;54151	9432;18930;18931;18932;18933;18934;18935;18936;18937;18938;18939	54140	18933	06mar_Diogo_NEK1_cpt_1	3299	54140	18933	06mar_Diogo_NEK1_cpt_1
NaN	NaN	NaN	20.8182	23.4651	NaN			___2	NaN	NaN	NaN	0	0.900061	0	>sp|Q96PY6|NEK1_HUMAN Serine/threonine-protein kinase Nek1 OS=Homo sapiens GN=NEK1 PE=1 SV=2;>sp|Q96PY6-3|NEK1_HUMAN Isoform 3 of Serine/threonine-protein kinase Nek1 OS=Homo sapiens GN=NEK1;>sp|Q96PY6-2|NEK1_HUMAN Isoform 2 of Serine/threonine-protein kinase Nek1 OS=Homo sapiens GN=NEK1;>sp|Q96PY6-6|NEK1_HUMAN Isoform 6 of Serine/threonine-protein kinase Nek1 OS=Homo sapiens GN=NEK1;>sp|Q96PY6-4…	666;694;622;650;597	DVSPPLGQHETGGSPSKQQMRSVISVTSALK	0.900061	9.5877		2	S	X;X;Phospho (STY);X;X;X;X;X;X;X;X;X;X;X;X;Phospho (STY);X;X;X;X;X;X;X;X;X;X;X;X;X;X;X	PPPPPPPPPPPPPPPPPXXXXXXXXXXXXXX	0.000582404	109.19	109.19	_SSDVS(ph)PPLGQHETGGSPS(ph)K_	S(0.074)S(0.089)DVS(0.837)PPLGQHETGGS(0.1)PS(0.9)K	S(-10.56)S(-9.76)DVS(9.76)PPLGQHET(-42.67)GGS(-9.59)PS(9.59)K	18	2	1013.91	0.48374	213	926	666	666	1715;4116;4117	1812;4409;4410;4411	54149;54152	18940	54149	18940	06mar_Diogo_NEK1_cpt_2	3731	54149	18940	06mar_Diogo_NEK1_cpt_2
NaN	NaN	NaN	22.9023	NaN	NaN			___2	NaN	NaN	NaN	1	0.998942	0	>sp|Q96PY6|NEK1_HUMAN Serine/threonine-protein kinase Nek1 OS=Homo sapiens GN=NEK1 PE=1 SV=2;>sp|Q96PY6-3|NEK1_HUMAN Isoform 3 of Serine/threonine-protein kinase Nek1 OS=Homo sapiens GN=NEK1;>sp|Q96PY6-2|NEK1_HUMAN Isoform 2 of Serine/threonine-protein kinase Nek1 OS=Homo sapiens GN=NEK1;>sp|Q96PY6-6|NEK1_HUMAN Isoform 6 of Serine/threonine-protein kinase Nek1 OS=Homo sapiens GN=NEK1;>sp|Q96PY6-4…	874;902;830;858;805	EINPSAIVDSPVETKSPEFSEASPQMSLKLE	1	69.531		1;2	S	X;X;X;X;Phospho (STY);X;X;X;X;Phospho (STY);X;X;X;X;X;Phospho (STY);X;X;X;X;X;X;Phospho (STY);X;X;Oxidation (M);X;X;X;X;X	PPPPPPPPPPPPPPPPPPPPPPPPPPPPPXX	3.24587e-14	159.13	152.94	_S(ph)PEFSEASPQM(ox)SLK_	S(1)PEFSEASPQMSLK	S(69.53)PEFS(-69.53)EAS(-88.66)PQMS(-114.71)LK	1	2	817.344	-0.77553	216	926	874	874	2396;4068;4901	2530;4358;4359;5243	32214;32216;32217;32218;32219;53533;53535;53538;53540;53542;53543;53544;53545;53546;53547	12381;18693;18694;18696;18697;18698;18701;18703;18704;18705	53533	18694	06mar_Diogo_NEK1-1	4846	53535	18697	06mar_Diogo_NEK1-3
NaN	NaN	NaN	22.9023	NaN	NaN			___2	NaN	NaN	NaN	0.999767	0	0.658476	>sp|Q96PY6|NEK1_HUMAN Serine/threonine-protein kinase Nek1 OS=Homo sapiens GN=NEK1 PE=1 SV=2;>sp|Q96PY6-3|NEK1_HUMAN Isoform 3 of Serine/threonine-protein kinase Nek1 OS=Homo sapiens GN=NEK1;>sp|Q96PY6-2|NEK1_HUMAN Isoform 2 of Serine/threonine-protein kinase Nek1 OS=Homo sapiens GN=NEK1;>sp|Q96PY6-6|NEK1_HUMAN Isoform 6 of Serine/threonine-protein kinase Nek1 OS=Homo sapiens GN=NEK1;>sp|Q96PY6-4…	881;909;837;865;812	VDSPVETKSPEFSEASPQMSLKLEGNLEEPD	0.999767	39.5618		1;2	S	X;X;Phospho (STY);X;X;X;X;X;Phospho (STY);X;X;X;X;X;X;Phospho (STY);X;X;Oxidation (M);X;X;X;X;X;X;X;X;X;X;X;X	XXXXXXXXPPPPPPPPPPPPPPXXXXXXXXX	8.44277e-05	129.05	119.08	_SPEFSEAS(ph)PQM(ox)SLK_	SPEFSEAS(1)PQMSLK	S(-45.91)PEFS(-39.56)EAS(39.56)PQMS(-40.13)LK	8	2	817.344	0.11418	218	926	881	881	2396;4068;4901	2530;4358;4359;5243	53534;53536;53537;53539;53541;53542;53543;53544;53545;53546;53547	18695;18699;18700;18702;18703;18704;18705	53537	18700	06mar_Diogo_NEK1_cpt_1	4560	53534	18695	06mar_Diogo_NEK1-2
NaN	NaN	NaN	NaN	NaN	25.0024			___2	NaN	NaN	NaN	0	0	1	>sp|Q9P000|COMD9_HUMAN COMM domain-containing protein 9 OS=Homo sapiens GN=COMMD9 PE=1 SV=2;>sp|Q9P000-2|COMD9_HUMAN Isoform 2 of COMM domain-containing protein 9 OS=Homo sapiens GN=COMMD9	165;123	QMKIQEDPSLCGDKPSISAVTVELSKETLDT	1	64.066		2	S	X;X;X;X;X;X;X;X;X;X;X;X;X;X;X;Phospho (STY);X;X;X;X;Phospho (STY);X;X;X;X;X;X;X;X;X;X	XXXXXXXXXXXXXXPPPPPPPPPPPPXXXXX	0.013844	94.616	94.616	_PS(ph)ISAVT(ph)VELSK_	PS(1)IS(0.007)AVT(0.496)VELS(0.496)K	PS(64.07)IS(-18.47)AVT(0)VELS(0)K	2	2	695.817	1.6589	275	1071	165	165	3585	3838	47002	16776	47002	16776	08mar_Diogo_NEK1_cpt3_rep	6543	47002	16776	08mar_Diogo_NEK1_cpt3_rep
NaN	NaN	NaN	NaN	NaN	30.3174			___2	NaN	NaN	NaN	0	0	0.99928	>sp|Q9UBF2|COPG2_HUMAN Coatomer subunit gamma-2 OS=Homo sapiens GN=COPG2 PE=1 SV=1	395	VQAISALCQKYPRKHSVMMTFLSNMLRDDGG	0.99928	28.4158		2	S	X;X;X;X;X;X;X;X;X;X;X;X;X;X;X;Phospho (STY);X;Oxidation (M);Oxidation (M);Phospho (STY);X;X;X;X;Oxidation (M);X;X;X;X;X;X	XXXXXXXXXXXXXPPPPPPPPPPPPPPXXXX	0.00833685	40.475	40.475	_KHS(ph)VM(ox)M(ox)T(ph)FLSNM(ox)LR_	KHS(0.999)VMMT(0.5)FLS(0.5)NMLR	KHS(28.42)VMMT(0)FLS(0)NMLR	3	3	634.929	2.6162	287	1087	395	395	2289	2419	31260	12091	31260	12091	25abril_Diogo_C+_E3	3739	31260	12091	25abril_Diogo_C+_E3
NaN	NaN	NaN	21.984	NaN	NaN			___2	NaN	NaN	NaN	0.999977	0	0	>tr|B4DWF2|B4DWF2_HUMAN Zinc finger protein Helios OS=Homo sapiens GN=ZNFN1A2 PE=2 SV=1;>sp|Q9UKS7|IKZF2_HUMAN Zinc finger protein Helios OS=Homo sapiens GN=IKZF2 PE=1 SV=2;>sp|Q9UKS7-2|IKZF2_HUMAN Isoform 2 of Zinc finger protein Helios OS=Homo sapiens GN=IKZF2;>tr|C9JCG7|C9JCG7_HUMAN Zinc finger protein Helios OS=Homo sapiens GN=IKZF2 PE=2 SV=2;>tr|C9JTM9|C9JTM9_HUMAN Zinc finger protein Helios…	299;293;267;221;219;148	SSTPQKFVGEKLMRFSYPDIHFDMNLTYEKE	0.999977	50.4584		2	S	X;X;X;X;X;X;X;X;X;X;X;X;X;X;X;Phospho (STY);Phospho (STY);X;X;X;X;X;X;Oxidation (M);X;X;X;X;X;X;X	XXXXXXXXXXXXXXPPPPPPPPPPPPPPPPX	0.0409297	55.335	55.335	_FS(ph)Y(ph)PDIHFDM(ox)NLTYEK_	FS(1)Y(1)PDIHFDMNLTYEK	FS(50.46)Y(49.11)PDIHFDMNLT(-49.11)Y(-50.33)EK	2	2	1098.43	-2.1711	299	1115	299	299	1356	1439	18032	7275	18032	7275	24abril_Diogo_C+_C1	3666	18032	7275	24abril_Diogo_C+_C1
NaN	NaN	NaN	22.4243	27.5866	27.5665			___2	NaN	NaN	NaN	0.999873	0.55903	0	>sp|Q9Y2Q0|AT8A1_HUMAN Probable phospholipid-transporting ATPase IA OS=Homo sapiens GN=ATP8A1 PE=1 SV=1;>sp|Q9Y2Q0-2|AT8A1_HUMAN Isoform 2 of Probable phospholipid-transporting ATPase IA OS=Homo sapiens GN=ATP8A1;>sp|Q9Y2Q0-3|AT8A1_HUMAN Isoform 3 of Probable phospholipid-transporting ATPase IA OS=Homo sapiens GN=ATP8A1	551;536;536	GQEERYELLNVLEFTSARKRMSVIVRTPSGK	0.999873	38.978		2	S	X;X;X;X;X;Phospho (STY);X;X;X;X;X;X;X;X;X;Phospho (STY);X;X;X;X;X;X;X;X;X;X;X;X;X;X;X	XXXXXPPPPPPPPPPPPPPXXXXXXXXXXXX	0.00066286	123.28	123.28	_Y(ph)ELLNVLEFTS(ph)ARK_	Y(1)ELLNVLEFTS(1)ARK	Y(96.5)ELLNVLEFT(-38.98)S(38.98)ARK	11	2	921.926	1.4226	307	1152	551	551	5063	5414	65438;65439;65440;65441;65442;65443;65444;65445;65446;65447;65448;65449;65450;65451;65452;65453;65454;65455;65456;65457;65458	22436;22437;22438;22439;22440;22441;22442	65442	22440	06mar_Diogo_NEK1_cpt_1	16054	65442	22440	06mar_Diogo_NEK1_cpt_1
NaN	NaN	NaN	28.4469	24.7525	28.9636			___2	NaN	NaN	NaN	1	0	1	>tr|A6NHJ8|A6NHJ8_HUMAN Quinone oxidoreductase-like protein 1 OS=Homo sapiens GN=CRYZL1 PE=2 SV=2;>tr|A8MZ10|A8MZ10_HUMAN Quinone oxidoreductase-like protein 1 OS=Homo sapiens GN=CRYZL1 PE=2 SV=1	5;5	___________MWLLSQIGPLHYAKRRNHLE	1	39.7304		2	S	X;X;X;X;X;X;X;X;X;X;X;Oxidation (M);X;X;X;Phospho (STY);X;X;X;X;X;X;Phospho (STY);X;X;X;X;X;X;X;X	XXXXXXXXXXXPPPPPPPPPPPPPPPXXXXX	0.0110233	39.73	39.73	_(ac)M(ox)WLLS(ph)QIGPLHY(ph)AKR_	MWLLS(1)QIGPLHY(1)AKR	MWLLS(39.73)QIGPLHY(39.73)AKR	5	4	508.489	-1.4975	321	1188	5	5	3303	3533	43384;43385;43386	15576;15577;15578	43386	15578	25abril_Diogo_C+_B3	4249	43386	15578	25abril_Diogo_C+_B3
NaN	NaN	NaN	NaN	NaN	22.0705			___2	NaN	NaN	NaN	0	0	0.927931	>tr|F5H5K2|F5H5K2_HUMAN Mediator of RNA polymerase II transcription subunit 24 (Fragment) OS=Homo sapiens GN=MED24 PE=2 SV=2	12	____MIGPSPNPLILSYLKYAISSQMVSYSS	0.99846	28.1185		2	S	X;X;X;X;Oxidation (M);X;X;X;X;X;X;X;X;X;X;Phospho (STY);Phospho (STY);X;X;X;X;X;X;X;X;X;X;X;X;X;X	XXXXPPPPPPPPPPPPPPPXXXXXXXXXXXX	0.00704502	75.548	58.712	_M(ox)IGPSPNPLILS(ph)Y(ph)LK_	MIGPS(0.002)PNPLILS(0.998)Y(1)LK	MIGPS(-28.12)PNPLILS(28.12)Y(42)LK	12	2	909.929	-2.5972	347	1233	12	12	3137	3340	41843;41844	15160;15161	41843	15160	06mar_Diogo_NEK1-1	11616	41844	15161	08mar_Diogo_NEK1_cpt3_rep
NaN	NaN	NaN	NaN	22.0199	NaN			___2	NaN	NaN	NaN	0	1	0	>tr|F8WC40|F8WC40_HUMAN Transcription factor E2F6 OS=Homo sapiens GN=E2F6 PE=2 SV=1	52	PSKIRINLEDNVQYVSMRM____________	1	31.6999		2	S	X;X;X;X;X;X;X;X;X;X;X;X;X;Phospho (STY);X;Phospho (STY);Oxidation (M);X;Oxidation (M);X;X;X;X;X;X;X;X;X;X;X;X	XXXXXPPPPPPPPPPPPPPXXXXXXXXXXXX	0.0430374	31.7	31.7	_INLEDNVQY(ph)VS(ph)M(ox)RM(ox)_	INLEDNVQY(1)VS(1)MRM	INLEDNVQY(31.7)VS(31.7)MRM	11	3	635.25	2.7889	348	1238	52	52	2092	2211	28755	11277	28755	11277	24abril_Diogo_C+_B2	2987	28755	11277	24abril_Diogo_C+_B2
NaN	NaN	NaN	21.5939	21.0542	NaN			___2	NaN	NaN	NaN	0	0.99998	0	>sp|Q68CJ9|CR3L3_HUMAN Cyclic AMP-responsive element-binding protein 3-like protein 3 OS=Homo sapiens GN=CREB3L3 PE=1 SV=2;>sp|Q68CJ9-2|CR3L3_HUMAN Isoform 2 of Cyclic AMP-responsive element-binding protein 3-like protein 3 OS=Homo sapiens GN=CREB3L3;>tr|B7ZL69|B7ZL69_HUMAN CREB3L3 protein OS=Homo sapiens GN=CREB3L3 PE=2 SV=1;>tr|M0QYW7|M0QYW7_HUMAN Cyclic AMP-responsive element-binding protein 3…	229;228;227;229;169	VLTEDEKKLLAKEGITLPTQLPLTKYEERVL	0.99998	47.0671		2	T	X;X;X;X;X;X;X;X;X;X;X;X;X;X;X;Phospho (STY);X;X;Phospho (STY);X;X;X;X;X;X;X;X;X;X;X;X	XXXXXXXXXXXXPPPPPPPPPPPPPXXXXXX	0.0322101	62.055	62.055	_EGIT(ph)LPT(ph)QLPLTK_	EGIT(1)LPT(1)QLPLTK	EGIT(47.07)LPT(37.65)QLPLT(-37.65)K	4	2	785.88	-0.7524	489	733	229	229	912	969	11487;11488;11489;11490;11491	3862	11487	3862	06mar_Diogo_NEK1_cpt_2	5099	11487	3862	06mar_Diogo_NEK1_cpt_2
NaN	NaN	NaN	21.5939	21.0542	NaN			___2	NaN	NaN	NaN	0	0.999828	0	>sp|Q68CJ9|CR3L3_HUMAN Cyclic AMP-responsive element-binding protein 3-like protein 3 OS=Homo sapiens GN=CREB3L3 PE=1 SV=2;>sp|Q68CJ9-2|CR3L3_HUMAN Isoform 2 of Cyclic AMP-responsive element-binding protein 3-like protein 3 OS=Homo sapiens GN=CREB3L3;>tr|B7ZL69|B7ZL69_HUMAN CREB3L3 protein OS=Homo sapiens GN=CREB3L3 PE=2 SV=1;>tr|M0QYW7|M0QYW7_HUMAN Cyclic AMP-responsive element-binding protein 3…	232;231;230;232;172	EDEKKLLAKEGITLPTQLPLTKYEERVLKKI	0.999828	37.648		2	T	X;X;X;X;X;X;X;X;X;X;X;X;Phospho (STY);X;X;Phospho (STY);X;X;X;X;X;X;X;X;X;X;X;X;X;X;X	XXXXXXXXXPPPPPPPPPPPPPXXXXXXXXX	0.0322101	62.055	62.055	_EGIT(ph)LPT(ph)QLPLTK_	EGIT(1)LPT(1)QLPLTK	EGIT(47.07)LPT(37.65)QLPLT(-37.65)K	7	2	785.88	-0.7524	490	733	232	232	912	969	11487;11488;11489;11490;11491	3862	11487	3862	06mar_Diogo_NEK1_cpt_2	5099	11487	3862	06mar_Diogo_NEK1_cpt_2
NaN	NaN	NaN	16.6615	16.3402	NaN			___2	NaN	NaN	NaN	0	0.993478	0	>sp|Q7Z7G0-4|TARSH_HUMAN Isoform 4 of Target of Nesh-SH3 OS=Homo sapiens GN=ABI3BP	2	______________MTIVPTTDIEPVTVRTE	0.993478	24.6819		2	T	X;X;X;X;X;X;X;X;X;X;X;X;X;X;X;Phospho (STY);X;X;X;X;X;X;X;X;X;X;Phospho (STY);X;X;X;X	XXXXXXXXXXXXXXXPPPPPPPPPPPPPPXX	0.0305179	47.082	37.237	_(ac)T(ph)IVPTTDIEPVT(ph)VR_	T(0.993)IVPT(0.021)T(0.02)DIEPVT(0.966)VR	T(24.68)IVPT(-17.42)T(-17.68)DIEPVT(17.42)VR	1	2	871.904	5.2094	506	787	2	2	4386	4696	57739;57740;57741;57742;57743;57744;57745	20214;20215	57740	20215	06mar_Diogo_NEK1_cpt_2	16820	57739	20214	06mar_Diogo_NEK1-3
NaN	NaN	NaN	16.6615	16.3402	NaN			___2	NaN	NaN	NaN	0	0.966059	0	>sp|Q7Z7G0-4|TARSH_HUMAN Isoform 4 of Target of Nesh-SH3 OS=Homo sapiens GN=ABI3BP	13	___MTIVPTTDIEPVTVRTEATVTTLAPKTS	0.996379	25.7732		2	T	X;X;X;X;Phospho (STY);X;X;X;X;X;X;X;X;X;X;Phospho (STY);X;X;X;X;X;X;X;X;X;X;X;X;X;X;X	XXXXPPPPPPPPPPPPPPXXXXXXXXXXXXX	0.0305179	47.082	47.082	_(ac)T(ph)IVPTTDIEPVT(ph)VR_	T(0.944)IVPT(0.031)T(0.029)DIEPVT(0.996)VR	T(15.01)IVPT(-15.01)T(-15.56)DIEPVT(25.77)VR	12	2	871.904	1.7172	507	787	13	13	4386	4696	57739;57740;57741;57742;57743;57744;57745	20214;20215	57739	20214	06mar_Diogo_NEK1-3	15796	57739	20214	06mar_Diogo_NEK1-3
NaN	NaN	NaN	19.5471	NaN	NaN			___2	NaN	NaN	NaN	0.999998	0	0	>sp|Q96II8-2|LRCH3_HUMAN Isoform 2 of Leucine-rich repeat and calponin homology domain-containing protein 3 OS=Homo sapiens GN=LRCH3;>sp|Q96II8|LRCH3_HUMAN Leucine-rich repeat and calponin homology domain-containing protein 3 OS=Homo sapiens GN=LRCH3 PE=1 SV=2;>tr|B4E0T7|B4E0T7_HUMAN Leucine-rich repeat and calponin homology domain-containing protein 3 OS=Homo sapiens GN=LRCH3 PE=2 SV=1;>tr|E9PD9…	714;714;662;560;309;189;151;92	SVPSIHVPSPAVPKLTMAKCRRNVENFLEAC	0.999998	60.7081		2	T	X;X;X;X;X;X;X;X;Phospho (STY);X;X;X;X;X;X;Phospho (STY);Oxidation (M);X;X;X;X;X;X;X;X;X;X;X;X;X;X	PPPPPPPPPPPPPPPPPPPXXXXXXXXXXXX	0.0255496	75.682	75.682	_PRSVPSIHVPS(ph)PAVPKLT(ph)M(ox)AK_	PRSVPSIHVPS(1)PAVPKLT(1)MAK	PRS(-59.07)VPS(-58.31)IHVPS(58.31)PAVPKLT(60.71)MAK	18	2	1194.6	0.96993	548	913	714	714	3582	3835	46999	16773	46999	16773	06mar_Diogo_NEK1_cpt_1	9020	46999	16773	06mar_Diogo_NEK1_cpt_1
NaN	NaN	NaN	NaN	20.1468	23.502			___2	NaN	NaN	NaN	0	0.970748	0	>sp|Q9NYQ6|CELR1_HUMAN Cadherin EGF LAG seven-pass G-type receptor 1 OS=Homo sapiens GN=CELSR1 PE=1 SV=1	2940	RKGILKNKVTYPPPLTLTEQTLKGRLREKLA	0.970748	15.2277		2	T	X;X;X;X;X;X;X;X;X;X;X;X;X;X;X;Phospho (STY);X;Phospho (STY);X;X;X;X;X;X;X;X;X;X;X;X;X	XXXXXXXXPPPPPPPPPPPPPPPXXXXXXXX	0.010573	74.475	74.475	_VTYPPPLT(ph)LT(ph)EQTLK_	VTY(0.03)PPPLT(0.971)LT(0.998)EQT(0.001)LK	VT(-39.13)Y(-15.23)PPPLT(15.23)LT(28.48)EQT(-32.85)LK	8	2	930.943	0.37873	604	1063	2940	2940	4962	5308	64388;64389;64390;64391;64392	22123	64388	22123	06mar_Diogo_NEK1_cpt_2	7081	64388	22123	06mar_Diogo_NEK1_cpt_2
NaN	NaN	NaN	NaN	20.1468	23.502			___2	NaN	NaN	NaN	0	0.998084	0	>sp|Q9NYQ6|CELR1_HUMAN Cadherin EGF LAG seven-pass G-type receptor 1 OS=Homo sapiens GN=CELSR1 PE=1 SV=1	2942	GILKNKVTYPPPLTLTEQTLKGRLREKLADC	0.998084	28.4828		2	T	X;X;X;X;X;X;X;X;X;X;X;X;X;Phospho (STY);X;Phospho (STY);X;X;X;X;X;X;X;X;X;X;X;X;X;X;X	XXXXXXPPPPPPPPPPPPPPPXXXXXXXXXX	0.010573	74.475	74.475	_VTYPPPLT(ph)LT(ph)EQTLK_	VTY(0.03)PPPLT(0.971)LT(0.998)EQT(0.001)LK	VT(-39.13)Y(-15.23)PPPLT(15.23)LT(28.48)EQT(-32.85)LK	10	2	930.943	0.37873	605	1063	2942	2942	4962	5308	64388;64389;64390;64391;64392	22123	64388	22123	06mar_Diogo_NEK1_cpt_2	7081	64388	22123	06mar_Diogo_NEK1_cpt_2
NaN	NaN	NaN	NaN	24.3327	23.0274			___2	NaN	NaN	NaN	0	0.998104	0	>tr|B7WPF4|B7WPF4_HUMAN Ubiquitin carboxyl-terminal hydrolase OS=Homo sapiens GN=USP24 PE=2 SV=2	2	______________MTTLLCMGFSDPATIRK	0.998104	28.1743		2	T	X;X;X;X;X;X;X;X;X;X;X;X;X;X;X;Phospho (STY);Phospho (STY);X;X;X;X;X;X;X;X;X;X;X;X;X;X	XXXXXXXXXXXXXXXPPPPPPPPPPPPPPPX	0.0408232	40.477	40.477	_(ac)T(ph)T(ph)LLCMGFSDPATIR_	T(0.998)T(0.998)LLCMGFS(0.003)DPAT(0.001)IR	T(28.17)T(28.35)LLCMGFS(-28.17)DPAT(-36.41)IR	1	2	942.887	1.3699	655	1205	2	2	4532	4851	59725;59726;59727	20719	59725	20719	24abril_Diogo_C+_B2	3581	59725	20719	24abril_Diogo_C+_B2
NaN	NaN	NaN	NaN	24.3327	23.0274			___2	NaN	NaN	NaN	0	0.998168	0	>tr|B7WPF4|B7WPF4_HUMAN Ubiquitin carboxyl-terminal hydrolase OS=Homo sapiens GN=USP24 PE=2 SV=2	3	_____________MTTLLCMGFSDPATIRKA	0.998168	28.3493		2	T	X;X;X;X;X;X;X;X;X;X;X;X;X;X;Phospho (STY);Phospho (STY);X;X;X;X;X;X;X;X;X;X;X;X;X;X;X	XXXXXXXXXXXXXXPPPPPPPPPPPPPPPXX	0.0408232	40.477	40.477	_(ac)T(ph)T(ph)LLCMGFSDPATIR_	T(0.998)T(0.998)LLCMGFS(0.003)DPAT(0.001)IR	T(28.17)T(28.35)LLCMGFS(-28.17)DPAT(-36.41)IR	2	2	942.887	1.3699	656	1205	3	3	4532	4851	59725;59726;59727	20719	59725	20719	24abril_Diogo_C+_B2	3581	59725	20719	24abril_Diogo_C+_B2
NaN	NaN	NaN	21.0942	20.9906	20.8644			___2	NaN	NaN	NaN	0	0	1	>tr|H0Y8X9|H0Y8X9_HUMAN Calcium-transporting ATPase type 2C member 1 (Fragment) OS=Homo sapiens GN=ATP2C1 PE=2 SV=1	2	______________VTVTLALGVMRMVKKRA	1	50.2074		2	T	X;X;X;X;X;X;X;X;X;X;X;X;X;X;X;Phospho (STY);X;Phospho (STY);X;X;X;X;X;Oxidation (M);X;Oxidation (M);X;X;X;X;X	XXXXXXXXXXXXXXPPPPPPPPPPPPPPXXX	0.00339554	50.207	50.207	_(ac)VT(ph)VT(ph)LALGVM(ox)RM(ox)VK_	VT(1)VT(1)LALGVMRMVK	VT(50.21)VT(50.21)LALGVMRMVK	2	3	584.613	2.4761	678	1244	2	2	4961	5307	64382;64383;64384;64385;64386;64387	22122	64382	22122	08mar_Diogo_NEK1_cpt3_rep	2117	64382	22122	08mar_Diogo_NEK1_cpt3_rep
NaN	NaN	NaN	21.0942	20.9906	20.8644			___2	NaN	NaN	NaN	0	0	1	>tr|H0Y8X9|H0Y8X9_HUMAN Calcium-transporting ATPase type 2C member 1 (Fragment) OS=Homo sapiens GN=ATP2C1 PE=2 SV=1	4	____________VTVTLALGVMRMVKKRAIV	1	50.2074		2	T	X;X;X;X;X;X;X;X;X;X;X;X;X;Phospho (STY);X;Phospho (STY);X;X;X;X;X;Oxidation (M);X;Oxidation (M);X;X;X;X;X;X;X	XXXXXXXXXXXXPPPPPPPPPPPPPPXXXXX	0.00339554	50.207	50.207	_(ac)VT(ph)VT(ph)LALGVM(ox)RM(ox)VK_	VT(1)VT(1)LALGVMRMVK	VT(50.21)VT(50.21)LALGVMRMVK	4	3	584.613	2.4761	679	1244	4	4	4961	5307	64382;64383;64384;64385;64386;64387	22122	64382	22122	08mar_Diogo_NEK1_cpt3_rep	2117	64382	22122	08mar_Diogo_NEK1_cpt3_rep
NaN	NaN	NaN	21.7824	21.9414	20.8044			___2	NaN	NaN	NaN	0	0.848201	0	>sp|P46926|GNPI1_HUMAN Glucosamine-6-phosphate isomerase 1 OS=Homo sapiens GN=GNPDA1 PE=1 SV=1;>sp|Q8TDQ7|GNPI2_HUMAN Glucosamine-6-phosphate isomerase 2 OS=Homo sapiens GN=GNPDA2 PE=1 SV=1;>sp|Q8TDQ7-2|GNPI2_HUMAN Isoform 2 of Glucosamine-6-phosphate isomerase 2 OS=Homo sapiens GN=GNPDA2;>tr|D6R9P4|D6R9P4_HUMAN Glucosamine-6-phosphate isomerase 1 OS=Homo sapiens GN=GNPDA1 PE=2 SV=1;>sp|Q8TDQ7-3|…	34;34;34;34;34;34;34;34;34	YIRNRIIQFNPGPEKYFTLGLPTGSTPLGCY	0.848201	7.52351		2	Y	X;X;X;X;X;X;X;X;X;X;X;X;X;X;X;Phospho (STY);X;X;X;X;X;X;X;X;X;X;X;X;X;X;Phospho (STY)	XXXXXXXXXXXXXXXPPPPPPPPPPPPPPPP	0.00825753	72.898	72.898	_Y(ph)FTLGLPTGSTPLGCY(ph)K_	Y(0.848)FT(0.152)LGLPTGS(0.151)T(0.151)PLGCY(0.697)K	Y(7.52)FT(-7.52)LGLPT(-32.66)GS(-6.65)T(-6.65)PLGCY(6.65)K	1	3	678.961	0.21762	739	408	34	34	5073	5424	65599;65600;65601;65602;65603;65604	22465	65599	22465	06mar_Diogo_NEK1_cpt_2	9986	65599	22465	06mar_Diogo_NEK1_cpt_2
NaN	NaN	NaN	NaN	18.8244	NaN			___2	NaN	NaN	NaN	0	0.999428	0	>sp|Q9UII4|HERC5_HUMAN E3 ISG15--protein ligase HERC5 OS=Homo sapiens GN=HERC5 PE=1 SV=2;>tr|E9PBL0|E9PBL0_HUMAN E3 ISG15--protein ligase HERC5 OS=Homo sapiens GN=HERC5 PE=2 SV=1	442;80	GSFLRKRRTTEMMPVYLDLNKARNIFKELTQ	0.999428	30.0218		2	Y	X;X;X;X;X;X;X;X;Phospho (STY);Phospho (STY);X;Oxidation (M);Oxidation (M);X;X;Phospho (STY);X;X;X;X;X;X;X;X;X;X;X;X;X;X;X	XXXXXXXPPPPPPPPPPPPPPXXXXXXXXXX	0.0387604	37.613	37.613	_RTT(ph)EM(ox)M(ox)PVY(ph)LDLNK_	RT(0.425)T(0.576)EMMPVY(0.999)LDLNK	RT(-1.32)T(1.32)EMMPVY(30.02)LDLNK	9	3	634.931	-1.307	824	1105	442	442	3801	4069	49546;49549	17493;17496	49549	17496	24abril_Diogo_C+_B2	5658	49549	17496	24abril_Diogo_C+_B2
NaN	NaN	NaN	21.984	NaN	NaN			___2	NaN	NaN	NaN	0.999972	0	0	>tr|B4DWF2|B4DWF2_HUMAN Zinc finger protein Helios OS=Homo sapiens GN=ZNFN1A2 PE=2 SV=1;>sp|Q9UKS7|IKZF2_HUMAN Zinc finger protein Helios OS=Homo sapiens GN=IKZF2 PE=1 SV=2;>sp|Q9UKS7-2|IKZF2_HUMAN Isoform 2 of Zinc finger protein Helios OS=Homo sapiens GN=IKZF2;>tr|C9JCG7|C9JCG7_HUMAN Zinc finger protein Helios OS=Homo sapiens GN=IKZF2 PE=2 SV=2;>tr|C9JTM9|C9JTM9_HUMAN Zinc finger protein Helios…	300;294;268;222;220;149	STPQKFVGEKLMRFSYPDIHFDMNLTYEKEA	0.999972	49.1095		2	Y	X;X;X;X;X;X;X;X;X;X;X;X;X;X;Phospho (STY);Phospho (STY);X;X;X;X;X;X;Oxidation (M);X;X;X;X;X;X;X;X	XXXXXXXXXXXXXPPPPPPPPPPPPPPPPXX	0.0409297	55.335	55.335	_FS(ph)Y(ph)PDIHFDM(ox)NLTYEK_	FS(1)Y(1)PDIHFDMNLTYEK	FS(50.46)Y(49.11)PDIHFDMNLT(-49.11)Y(-50.33)EK	3	2	1098.43	-2.1711	828	1115	300	300	1356	1439	18032	7275	18032	7275	24abril_Diogo_C+_C1	3666	18032	7275	24abril_Diogo_C+_C1
NaN	NaN	NaN	22.4243	27.5866	27.5665			___2	NaN	NaN	NaN	1	0.999999	0	>sp|Q9Y2Q0|AT8A1_HUMAN Probable phospholipid-transporting ATPase IA OS=Homo sapiens GN=ATP8A1 PE=1 SV=1;>sp|Q9Y2Q0-2|AT8A1_HUMAN Isoform 2 of Probable phospholipid-transporting ATPase IA OS=Homo sapiens GN=ATP8A1;>sp|Q9Y2Q0-3|AT8A1_HUMAN Isoform 3 of Probable phospholipid-transporting ATPase IA OS=Homo sapiens GN=ATP8A1	541;526;526	TPDSVIIDSLGQEERYELLNVLEFTSARKRM	1	78.5179		2	Y	X;X;X;X;X;X;X;X;X;X;X;X;X;X;X;Phospho (STY);X;X;X;X;X;X;X;X;Phospho (STY);Phospho (STY);X;X;X;X;X	XXXXXXXXXXXXXXXPPPPPPPPPPPPPPXX	0.00066286	123.28	113.69	_Y(ph)ELLNVLEFTS(ph)ARK_	Y(1)ELLNVLEFT(0.028)S(0.972)ARK	Y(78.52)ELLNVLEFT(-15.36)S(15.36)ARK	1	2	921.926	1.1983	834	1152	541	541	5063	5414	65438;65439;65440;65441;65442;65443;65444;65445;65446;65447;65448;65449;65450;65451;65452;65453;65454;65455;65456;65457;65458	22436;22437;22438;22439;22440;22441;22442	65443	22441	06mar_Diogo_NEK1_cpt_1	5817	65442	22440	06mar_Diogo_NEK1_cpt_1
NaN	NaN	NaN	28.4469	24.7525	28.9636			___2	NaN	NaN	NaN	1	0	1	>tr|A6NHJ8|A6NHJ8_HUMAN Quinone oxidoreductase-like protein 1 OS=Homo sapiens GN=CRYZL1 PE=2 SV=2;>tr|A8MZ10|A8MZ10_HUMAN Quinone oxidoreductase-like protein 1 OS=Homo sapiens GN=CRYZL1 PE=2 SV=1	12;12	____MWLLSQIGPLHYAKRRNHLERDVTMKG	1	39.7304	+	2	Y	X;X;X;X;Oxidation (M);X;X;X;Phospho (STY);X;X;X;X;X;X;Phospho (STY);X;X;X;X;X;X;X;X;X;X;X;X;X;X;X	XXXXPPPPPPPPPPPPPPPXXXXXXXXXXXX	0.0110233	39.73	39.73	_(ac)M(ox)WLLS(ph)QIGPLHY(ph)AKR_	MWLLS(1)QIGPLHY(1)AKR	MWLLS(39.73)QIGPLHY(39.73)AKR	12	4	508.489	-1.4975	840	1188	12	12	3303	3533	43384;43385;43386	15576;15577;15578	43386	15578	25abril_Diogo_C+_B3	4249	43386	15578	25abril_Diogo_C+_B3
NaN	NaN	NaN	NaN	NaN	22.0705			___2	NaN	NaN	NaN	0	0	0.999222	>tr|F5H5K2|F5H5K2_HUMAN Mediator of RNA polymerase II transcription subunit 24 (Fragment) OS=Homo sapiens GN=MED24 PE=2 SV=2	13	___MIGPSPNPLILSYLKYAISSQMVSYSSV	0.999937	41.9953		2	Y	X;X;X;Oxidation (M);X;X;X;X;X;X;X;X;X;X;Phospho (STY);Phospho (STY);X;X;X;X;X;X;X;X;X;X;X;X;X;X;X	XXXPPPPPPPPPPPPPPPXXXXXXXXXXXXX	0.00704502	75.548	58.712	_M(ox)IGPSPNPLILS(ph)Y(ph)LK_	MIGPS(0.002)PNPLILS(0.998)Y(1)LK	MIGPS(-28.12)PNPLILS(28.12)Y(42)LK	13	2	909.929	-2.5972	849	1233	13	13	3137	3340	41843;41844	15160;15161	41843	15160	06mar_Diogo_NEK1-1	11616	41844	15161	08mar_Diogo_NEK1_cpt3_rep
NaN	NaN	NaN	NaN	22.0199	NaN			___2	NaN	NaN	NaN	0	1	0	>tr|F8WC40|F8WC40_HUMAN Transcription factor E2F6 OS=Homo sapiens GN=E2F6 PE=2 SV=1	50	LLPSKIRINLEDNVQYVSMRM__________	1	31.6999		2	Y	X;X;X;X;X;X;X;X;X;X;X;X;X;X;X;Phospho (STY);X;Phospho (STY);Oxidation (M);X;Oxidation (M);X;X;X;X;X;X;X;X;X;X	XXXXXXXPPPPPPPPPPPPPPXXXXXXXXXX	0.0430374	31.7	31.7	_INLEDNVQY(ph)VS(ph)M(ox)RM(ox)_	INLEDNVQY(1)VS(1)MRM	INLEDNVQY(31.7)VS(31.7)MRM	9	3	635.25	2.7889	850	1238	50	50	2092	2211	28755	11277	28755	11277	24abril_Diogo_C+_B2	2987	28755	11277	24abril_Diogo_C+_B2
NaN	NaN	NaN	NaN	NaN	24.5466			___3	NaN	NaN	NaN	0	0	1	>sp|O43314|VIP2_HUMAN Inositol hexakisphosphate and diphosphoinositol-pentakisphosphate kinase 2 OS=Homo sapiens GN=PPIP5K2 PE=1 SV=3;>sp|O43314-2|VIP2_HUMAN Isoform 2 of Inositol hexakisphosphate and diphosphoinositol-pentakisphosphate kinase 2 OS=Homo sapiens GN=PPIP5K2	668;668	MHLIKNPVKTCDKVYSLIQSLTSQIRHRMED	1	50.0775		5	S	X;X;X;X;X;X;X;X;X;X;X;X;X;X;Phospho (STY);Phospho (STY);X;X;X;Phospho (STY);X;Phospho (STY);Phospho (STY);X;X;X;X;X;X;X;X	XXXXXXXXXXXXXPPPPPPPPPPPPPXXXXX	0.0426581	50.077	50.077	_VY(ph)S(ph)LIQS(ph)LT(ph)S(ph)QIR_	VY(1)S(1)LIQS(1)LT(1)S(1)QIR	VY(50.08)S(50.08)LIQS(50.08)LT(50.08)S(50.08)QIR	3	2	954.343	-1.9698	22	58	668	668	5005	5355	64732	22238	64732	22238	25abril_Diogo_C+_A3	3470	64732	22238	25abril_Diogo_C+_A3
NaN	NaN	NaN	NaN	NaN	24.5466			___3	NaN	NaN	NaN	0	0	1	>sp|O43314|VIP2_HUMAN Inositol hexakisphosphate and diphosphoinositol-pentakisphosphate kinase 2 OS=Homo sapiens GN=PPIP5K2 PE=1 SV=3;>sp|O43314-2|VIP2_HUMAN Isoform 2 of Inositol hexakisphosphate and diphosphoinositol-pentakisphosphate kinase 2 OS=Homo sapiens GN=PPIP5K2	672;672	KNPVKTCDKVYSLIQSLTSQIRHRMEDPKSS	1	50.0775		5	S	X;X;X;X;X;X;X;X;X;X;Phospho (STY);Phospho (STY);X;X;X;Phospho (STY);X;Phospho (STY);Phospho (STY);X;X;X;X;X;X;X;X;X;X;X;X	XXXXXXXXXPPPPPPPPPPPPPXXXXXXXXX	0.0426581	50.077	50.077	_VY(ph)S(ph)LIQS(ph)LT(ph)S(ph)QIR_	VY(1)S(1)LIQS(1)LT(1)S(1)QIR	VY(50.08)S(50.08)LIQS(50.08)LT(50.08)S(50.08)QIR	7	2	954.343	-1.9698	23	58	672	672	5005	5355	64732	22238	64732	22238	25abril_Diogo_C+_A3	3470	64732	22238	25abril_Diogo_C+_A3
NaN	NaN	NaN	NaN	NaN	24.5466			___3	NaN	NaN	NaN	0	0	1	>sp|O43314|VIP2_HUMAN Inositol hexakisphosphate and diphosphoinositol-pentakisphosphate kinase 2 OS=Homo sapiens GN=PPIP5K2 PE=1 SV=3;>sp|O43314-2|VIP2_HUMAN Isoform 2 of Inositol hexakisphosphate and diphosphoinositol-pentakisphosphate kinase 2 OS=Homo sapiens GN=PPIP5K2	675;675	VKTCDKVYSLIQSLTSQIRHRMEDPKSSDIQ	1	50.0775		5	S	X;X;X;X;X;X;X;Phospho (STY);Phospho (STY);X;X;X;Phospho (STY);X;Phospho (STY);Phospho (STY);X;X;X;X;X;X;X;X;X;X;X;X;X;X;X	XXXXXXPPPPPPPPPPPPPXXXXXXXXXXXX	0.0426581	50.077	50.077	_VY(ph)S(ph)LIQS(ph)LT(ph)S(ph)QIR_	VY(1)S(1)LIQS(1)LT(1)S(1)QIR	VY(50.08)S(50.08)LIQS(50.08)LT(50.08)S(50.08)QIR	10	2	954.343	-1.9698	24	58	675	675	5005	5355	64732	22238	64732	22238	25abril_Diogo_C+_A3	3470	64732	22238	25abril_Diogo_C+_A3
NaN	NaN	NaN	18.6771	NaN	NaN			___3	NaN	NaN	NaN	0.951106	0	0	>sp|P11150|LIPC_HUMAN Hepatic triacylglycerol lipase OS=Homo sapiens GN=LIPC PE=1 SV=3;>tr|E7EUJ1|E7EUJ1_HUMAN Hepatic triacylglycerol lipase OS=Homo sapiens GN=LIPC PE=2 SV=1;>tr|E7EUK6|E7EUK6_HUMAN Hepatic triacylglycerol lipase OS=Homo sapiens GN=LIPC PE=2 SV=1	20;20;20	PLCFSILLVLCIFIQSSALGQSLKPEPFGRR	0.951106	16.1676		3	S	X;X;X;X;X;X;X;X;X;X;X;X;X;X;X;Phospho (STY);Phospho (STY);X;X;X;X;Phospho (STY);X;X;X;X;X;X;X;X;X	PPPPPPPPPPPPPPPPPPPPPPPPXXXXXXX	0.0415685	35.179	35.179	_(ac)M(ox)DTSPLCFSILLVLCIFIQS(ph)S(ph)ALGQS(ph)LK_	MDT(0.019)S(0.019)PLCFS(0.033)ILLVLCIFIQS(0.951)S(0.984)ALGQS(0.995)LK	MDT(-20.53)S(-20.53)PLCFS(-16.17)ILLVLCIFIQS(16.17)S(23.93)ALGQS(31.16)LK	20	3	1147.19	0.059921	62	232	20	20	3047	3225	40762	14881	40762	14881	06mar_Diogo_NEK1_cpt_1	10518	40762	14881	06mar_Diogo_NEK1_cpt_1
NaN	NaN	NaN	18.6771	NaN	NaN			___3	NaN	NaN	NaN	0.98386	0	0	>sp|P11150|LIPC_HUMAN Hepatic triacylglycerol lipase OS=Homo sapiens GN=LIPC PE=1 SV=3;>tr|E7EUJ1|E7EUJ1_HUMAN Hepatic triacylglycerol lipase OS=Homo sapiens GN=LIPC PE=2 SV=1;>tr|E7EUK6|E7EUK6_HUMAN Hepatic triacylglycerol lipase OS=Homo sapiens GN=LIPC PE=2 SV=1	21;21;21	LCFSILLVLCIFIQSSALGQSLKPEPFGRRA	0.98386	23.9263		3	S	X;X;X;X;X;X;X;X;X;X;X;X;X;X;Phospho (STY);Phospho (STY);X;X;X;X;Phospho (STY);X;X;X;X;X;X;X;X;X;X	PPPPPPPPPPPPPPPPPPPPPPPXXXXXXXX	0.0415685	35.179	35.179	_(ac)M(ox)DTSPLCFSILLVLCIFIQS(ph)S(ph)ALGQS(ph)LK_	MDT(0.019)S(0.019)PLCFS(0.033)ILLVLCIFIQS(0.951)S(0.984)ALGQS(0.995)LK	MDT(-20.53)S(-20.53)PLCFS(-16.17)ILLVLCIFIQS(16.17)S(23.93)ALGQS(31.16)LK	21	3	1147.19	0.059921	63	232	21	21	3047	3225	40762	14881	40762	14881	06mar_Diogo_NEK1_cpt_1	10518	40762	14881	06mar_Diogo_NEK1_cpt_1
NaN	NaN	NaN	18.6771	NaN	NaN			___3	NaN	NaN	NaN	0.994606	0	0	>sp|P11150|LIPC_HUMAN Hepatic triacylglycerol lipase OS=Homo sapiens GN=LIPC PE=1 SV=3;>tr|E7EUJ1|E7EUJ1_HUMAN Hepatic triacylglycerol lipase OS=Homo sapiens GN=LIPC PE=2 SV=1;>tr|E7EUK6|E7EUK6_HUMAN Hepatic triacylglycerol lipase OS=Homo sapiens GN=LIPC PE=2 SV=1	26;26;26	LLVLCIFIQSSALGQSLKPEPFGRRAQAVET	0.994606	31.1611		3	S	X;X;X;X;X;X;X;X;X;Phospho (STY);Phospho (STY);X;X;X;X;Phospho (STY);X;X;X;X;X;X;X;X;X;X;X;X;X;X;X	PPPPPPPPPPPPPPPPPPXXXXXXXXXXXXX	0.0415685	35.179	35.179	_(ac)M(ox)DTSPLCFSILLVLCIFIQS(ph)S(ph)ALGQS(ph)LK_	MDT(0.019)S(0.019)PLCFS(0.033)ILLVLCIFIQS(0.951)S(0.984)ALGQS(0.995)LK	MDT(-20.53)S(-20.53)PLCFS(-16.17)ILLVLCIFIQS(16.17)S(23.93)ALGQS(31.16)LK	26	3	1147.19	0.059921	64	232	26	26	3047	3225	40762	14881	40762	14881	06mar_Diogo_NEK1_cpt_1	10518	40762	14881	06mar_Diogo_NEK1_cpt_1
NaN	NaN	NaN	21.0908	21.6527	NaN			___3	NaN	NaN	NaN	0	0.862321	0	>sp|P33527-9|MRP1_HUMAN Isoform 9 of Multidrug resistance-associated protein 1 OS=Homo sapiens GN=ABCC1;>sp|P33527|MRP1_HUMAN Multidrug resistance-associated protein 1 OS=Homo sapiens GN=ABCC1 PE=1 SV=3;>sp|P33527-3|MRP1_HUMAN Isoform 3 of Multidrug resistance-associated protein 1 OS=Homo sapiens GN=ABCC1;>sp|P33527-2|MRP1_HUMAN Isoform 2 of Multidrug resistance-associated protein 1 OS=Homo sapie…	1035;1025;969;966;1025;934;910;969;966;910	EHTKVRLSVYGALGISQGIAVFGYSMAVSIG	0.862321	5.89841		4	S	X;X;X;X;X;X;X;Phospho (STY);X;X;X;X;X;X;X;Phospho (STY);X;X;X;X;X;X;X;Phospho (STY);X;Oxidation (M);X;X;Phospho (STY);X;X	XXXXXXPPPPPPPPPPPPPPPPPPPPPPPPP	0.0317597	35.216	35.216	_LS(ph)VYGALGIS(ph)QGIAVFGY(ph)SM(ox)AVS(ph)IGGILASR_	LS(0.574)VY(0.543)GALGIS(0.862)QGIAVFGY(0.563)S(0.533)MAVS(0.712)IGGILAS(0.212)R	LS(0.33)VY(-0.33)GALGIS(5.9)QGIAVFGY(0.33)S(-0.33)MAVS(5.01)IGGILAS(-6.19)R	10	3	1131.84	0.27096	79	353	1035	1035	2883	3049	39335;39336;39337;39338	14504	39335	14504	06mar_Diogo_NEK1_cpt_2	8189	39335	14504	06mar_Diogo_NEK1_cpt_2
NaN	NaN	NaN	NaN	NaN	20.9733			___3	NaN	NaN	NaN	0.868668	0	0	>sp|Q6P0Q8|MAST2_HUMAN Microtubule-associated serine/threonine-protein kinase 2 OS=Homo sapiens GN=MAST2 PE=1 SV=2;>sp|Q6P0Q8-2|MAST2_HUMAN Isoform 2 of Microtubule-associated serine/threonine-protein kinase 2 OS=Homo sapiens GN=MAST2;>tr|E7ERL6|E7ERL6_HUMAN Microtubule-associated serine/threonine-protein kinase 2 OS=Homo sapiens GN=MAST2 PE=2 SV=1	183;183;183	CRTSNRKSLIVTSSTSPTLPRPHSPLHGHTG	0.868668	8.57741		3	S	X;X;X;X;X;X;X;Phospho (STY);X;X;X;X;X;X;Phospho (STY);Phospho (STY);X;Phospho (STY);X;X;X;X;X;X;X;X;X;X;X;X;X	XXXXXXPPPPPPPPPPPPPPPXXXXXXXXXX	0.00548902	92.457	87.083	_KS(ph)LIVTSSTS(ph)PT(ph)LPR_	KS(0.812)LIVT(0.187)S(0.002)S(0.014)T(0.131)S(0.869)PT(0.986)LPR	KS(6.34)LIVT(-6.34)S(-26.89)S(-19.04)T(-8.58)S(8.58)PT(19.04)LPR	10	2	913.909	-3.622	143	745	183	183	2368	2500	31999;32000;32001;32002;32003;32004;32005;32006;32007;32008	12305;12306;12307	32001	12307	24abril_Diogo_C+_D1	4754	31999	12305	27mar_Diogo_CPT-_3D
NaN	NaN	NaN	NaN	NaN	18.6186			___3	NaN	NaN	NaN	0	0	0.988376	>sp|Q86X24|HORM1_HUMAN HORMA domain-containing protein 1 OS=Homo sapiens GN=HORMAD1 PE=2 SV=1;>tr|J3QSX5|J3QSX5_HUMAN HORMA domain-containing protein 1 OS=Homo sapiens GN=HORMAD1 PE=2 SV=1;>sp|Q86X24-2|HORM1_HUMAN Isoform 2 of HORMA domain-containing protein 1 OS=Homo sapiens GN=HORMAD1;>sp|Q86X24-3|HORM1_HUMAN Isoform 3 of HORMA domain-containing protein 1 OS=Homo sapiens GN=HORMAD1;>sp|Q86X24-5…	136;136;129;65;58;56	YTNNGPLMDFISKNQSNESSMLSTDTKKASI	0.988376	19.6121		4	S	X;X;X;X;X;X;X;X;X;X;X;X;X;X;X;Phospho (STY);X;X;Phospho (STY);Phospho (STY);Oxidation (M);X;Phospho (STY);X;X;X;X;X;X;X;X	XXXXXXXXXXXXXPPPPPPPPPPPPPPPXXX	0.0427259	32.275	32.275	_NQS(ph)NES(ph)S(ph)M(ox)LS(ph)TDTKK_	NQS(0.988)NES(0.968)S(0.968)MLS(0.481)T(0.484)DT(0.11)KK	NQS(19.61)NES(14.45)S(14.45)MLS(0)T(0)DT(-7.34)KK	3	4	502.163	2.8392	155	803	136	136	3472	3717	45582	16169	45582	16169	25abril_Diogo_C+_E3	2946	45582	16169	25abril_Diogo_C+_E3
NaN	NaN	NaN	NaN	NaN	18.6186			___3	NaN	NaN	NaN	0	0	0.968367	>sp|Q86X24|HORM1_HUMAN HORMA domain-containing protein 1 OS=Homo sapiens GN=HORMAD1 PE=2 SV=1;>tr|J3QSX5|J3QSX5_HUMAN HORMA domain-containing protein 1 OS=Homo sapiens GN=HORMAD1 PE=2 SV=1;>sp|Q86X24-2|HORM1_HUMAN Isoform 2 of HORMA domain-containing protein 1 OS=Homo sapiens GN=HORMAD1;>sp|Q86X24-3|HORM1_HUMAN Isoform 3 of HORMA domain-containing protein 1 OS=Homo sapiens GN=HORMAD1;>sp|Q86X24-5…	139;139;132;68;61;59	NGPLMDFISKNQSNESSMLSTDTKKASILLI	0.968367	14.4511		4	S	X;X;X;X;X;X;X;X;X;X;X;X;Phospho (STY);X;X;Phospho (STY);Phospho (STY);Oxidation (M);X;Phospho (STY);X;X;X;X;X;X;X;X;X;X;X	XXXXXXXXXXPPPPPPPPPPPPPPPXXXXXX	0.0427259	32.275	32.275	_NQS(ph)NES(ph)S(ph)M(ox)LS(ph)TDTKK_	NQS(0.988)NES(0.968)S(0.968)MLS(0.481)T(0.484)DT(0.11)KK	NQS(19.61)NES(14.45)S(14.45)MLS(0)T(0)DT(-7.34)KK	6	4	502.163	2.8392	156	803	139	139	3472	3717	45582	16169	45582	16169	25abril_Diogo_C+_E3	2946	45582	16169	25abril_Diogo_C+_E3
NaN	NaN	NaN	NaN	NaN	18.6186			___3	NaN	NaN	NaN	0	0	0.968367	>sp|Q86X24|HORM1_HUMAN HORMA domain-containing protein 1 OS=Homo sapiens GN=HORMAD1 PE=2 SV=1;>tr|J3QSX5|J3QSX5_HUMAN HORMA domain-containing protein 1 OS=Homo sapiens GN=HORMAD1 PE=2 SV=1;>sp|Q86X24-2|HORM1_HUMAN Isoform 2 of HORMA domain-containing protein 1 OS=Homo sapiens GN=HORMAD1;>sp|Q86X24-3|HORM1_HUMAN Isoform 3 of HORMA domain-containing protein 1 OS=Homo sapiens GN=HORMAD1;>sp|Q86X24-5…	140;140;133;69;62;60	GPLMDFISKNQSNESSMLSTDTKKASILLIR	0.968367	14.4511		4	S	X;X;X;X;X;X;X;X;X;X;X;Phospho (STY);X;X;Phospho (STY);Phospho (STY);Oxidation (M);X;Phospho (STY);X;X;X;X;X;X;X;X;X;X;X;X	XXXXXXXXXPPPPPPPPPPPPPPPXXXXXXX	0.0427259	32.275	32.275	_NQS(ph)NES(ph)S(ph)M(ox)LS(ph)TDTKK_	NQS(0.988)NES(0.968)S(0.968)MLS(0.481)T(0.484)DT(0.11)KK	NQS(19.61)NES(14.45)S(14.45)MLS(0)T(0)DT(-7.34)KK	7	4	502.163	2.8392	157	803	140	140	3472	3717	45582	16169	45582	16169	25abril_Diogo_C+_E3	2946	45582	16169	25abril_Diogo_C+_E3
NaN	NaN	NaN	21.3906	NaN	NaN			___3	NaN	NaN	NaN	0.959003	0	0	>sp|Q9NYV9|T2R13_HUMAN Taste receptor type 2 member 13 OS=Homo sapiens GN=TAS2R13 PE=1 SV=1	3	_____________MESALPSIFTLVIIAEFI	0.959003	10.7359		3	S	X;X;X;X;X;X;X;X;X;X;X;X;X;X;X;Phospho (STY);X;X;X;Phospho (STY);X;X;X;X;X;X;X;X;X;X;X	XXXXXXXXXXXXXPPPPPPPPPPPPPPPPPP	0.020567	39.473	39.473	_(ac)MES(ph)ALPS(ph)IFTLVIIAEFIIGNLS(ph)NGFIVLINCIDWVSK_	MES(0.959)ALPS(0.521)IFT(0.521)LVIIAEFIIGNLS(0.987)NGFIVLINCIDWVS(0.012)K	MES(10.74)ALPS(0)IFT(0)LVIIAEFIIGNLS(19.24)NGFIVLINCIDWVS(-19.24)K	3	4	1130.55	-3.33	268	1064	3	3	3073	3255	40939	14926	40939	14926	24abril_Diogo_C+_E1	5237	40939	14926	24abril_Diogo_C+_E1
NaN	NaN	NaN	21.3906	NaN	NaN			___3	NaN	NaN	NaN	0.987039	0	0	>sp|Q9NYV9|T2R13_HUMAN Taste receptor type 2 member 13 OS=Homo sapiens GN=TAS2R13 PE=1 SV=1	23	IFTLVIIAEFIIGNLSNGFIVLINCIDWVSK	0.987039	19.2374		3	S	X;X;X;X;X;X;X;X;X;X;X;X;X;X;X;Phospho (STY);X;X;X;X;X;X;X;X;X;X;X;X;X;X;X	PPPPPPPPPPPPPPPPPPPPPPPPPPPPPPP	0.020567	39.473	39.473	_(ac)MES(ph)ALPS(ph)IFTLVIIAEFIIGNLS(ph)NGFIVLINCIDWVSK_	MES(0.959)ALPS(0.521)IFT(0.521)LVIIAEFIIGNLS(0.987)NGFIVLINCIDWVS(0.012)K	MES(10.74)ALPS(0)IFT(0)LVIIAEFIIGNLS(19.24)NGFIVLINCIDWVS(-19.24)K	23	4	1130.55	-3.33	270	1064	23	23	3073	3255	40939	14926	40939	14926	24abril_Diogo_C+_E1	5237	40939	14926	24abril_Diogo_C+_E1
NaN	NaN	NaN	NaN	19.2605	NaN			___3	NaN	NaN	NaN	0	1	0	>sp|Q9Y5A9|YTHD2_HUMAN YTH domain family protein 2 OS=Homo sapiens GN=YTHDF2 PE=1 SV=2;>tr|S4R3V3|S4R3V3_HUMAN YTH domain family protein 2 (Fragment) OS=Homo sapiens GN=YTHDF2 PE=4 SV=1;>tr|S4R3J8|S4R3J8_HUMAN YTH domain family protein 2 (Fragment) OS=Homo sapiens GN=YTHDF2 PE=4 SV=1	2;2;2	______________MSASSLLEQRPKGQGNK	1	31.2862		3	S	X;X;X;X;X;X;X;X;X;X;X;X;X;X;Oxidation (M);Phospho (STY);X;Phospho (STY);Phospho (STY);X;X;X;X;X;X;X;X;X;X;X;X	XXXXXXXXXXXXXXPPPPPPPPPPXXXXXXX	0.0411839	31.286	31.286	_(ac)M(ox)S(ph)AS(ph)S(ph)LLEQR_	MS(1)AS(1)S(1)LLEQR	MS(31.29)AS(31.29)S(31.29)LLEQR	2	2	710.237	-2.6653	317	1173	2	2	3227	3446	42616	15364	42616	15364	24abril_Diogo_C+_C2	2856	42616	15364	24abril_Diogo_C+_C2
NaN	NaN	NaN	NaN	19.2605	NaN			___3	NaN	NaN	NaN	0	1	0	>sp|Q9Y5A9|YTHD2_HUMAN YTH domain family protein 2 OS=Homo sapiens GN=YTHDF2 PE=1 SV=2;>tr|S4R3V3|S4R3V3_HUMAN YTH domain family protein 2 (Fragment) OS=Homo sapiens GN=YTHDF2 PE=4 SV=1;>tr|S4R3J8|S4R3J8_HUMAN YTH domain family protein 2 (Fragment) OS=Homo sapiens GN=YTHDF2 PE=4 SV=1	4;4;4	____________MSASSLLEQRPKGQGNKVQ	1	31.2862		3	S	X;X;X;X;X;X;X;X;X;X;X;X;Oxidation (M);Phospho (STY);X;Phospho (STY);Phospho (STY);X;X;X;X;X;X;X;X;X;X;X;X;X;X	XXXXXXXXXXXXPPPPPPPPPPXXXXXXXXX	0.0411839	31.286	31.286	_(ac)M(ox)S(ph)AS(ph)S(ph)LLEQR_	MS(1)AS(1)S(1)LLEQR	MS(31.29)AS(31.29)S(31.29)LLEQR	4	2	710.237	-2.6653	318	1173	4	4	3227	3446	42616	15364	42616	15364	24abril_Diogo_C+_C2	2856	42616	15364	24abril_Diogo_C+_C2
NaN	NaN	NaN	NaN	19.2605	NaN			___3	NaN	NaN	NaN	0	1	0	>sp|Q9Y5A9|YTHD2_HUMAN YTH domain family protein 2 OS=Homo sapiens GN=YTHDF2 PE=1 SV=2;>tr|S4R3V3|S4R3V3_HUMAN YTH domain family protein 2 (Fragment) OS=Homo sapiens GN=YTHDF2 PE=4 SV=1;>tr|S4R3J8|S4R3J8_HUMAN YTH domain family protein 2 (Fragment) OS=Homo sapiens GN=YTHDF2 PE=4 SV=1	5;5;5	___________MSASSLLEQRPKGQGNKVQN	1	31.2862		3	S	X;X;X;X;X;X;X;X;X;X;X;Oxidation (M);Phospho (STY);X;Phospho (STY);Phospho (STY);X;X;X;X;X;X;X;X;X;X;X;X;X;X;X	XXXXXXXXXXXPPPPPPPPPPXXXXXXXXXX	0.0411839	31.286	31.286	_(ac)M(ox)S(ph)AS(ph)S(ph)LLEQR_	MS(1)AS(1)S(1)LLEQR	MS(31.29)AS(31.29)S(31.29)LLEQR	5	2	710.237	-2.6653	319	1173	5	5	3227	3446	42616	15364	42616	15364	24abril_Diogo_C+_C2	2856	42616	15364	24abril_Diogo_C+_C2
NaN	NaN	NaN	24.5489	NaN	NaN			___3	NaN	NaN	NaN	0.805484	0	0	>tr|B4DN34|B4DN34_HUMAN 39S ribosomal protein L48, mitochondrial OS=Homo sapiens GN=MRPL48 PE=2 SV=1	25	SSGLPLILHYGGILLSISRPYKTKPTHGIGK	0.805484	6.05455		4	S	Phospho (STY);Phospho (STY);X;X;X;X;X;X;X;Phospho (STY);X;X;X;X;X;Phospho (STY);X;X;X;X;X;X;X;X;X;X;X;X;X;X;X	PPPPPPPPPPPPPPPPPPPXXXXXXXXXXXX	0.0407745	34.236	34.236	_KTS(ph)S(ph)GLPLILHY(ph)GGILLS(ph)ISR_	KT(0.651)S(0.675)S(0.675)GLPLILHY(0.97)GGILLS(0.805)IS(0.223)R	KT(-0.32)S(0.32)S(0.32)GLPLILHY(14.64)GGILLS(6.05)IS(-6.05)R	18	3	849.061	1.7586	326	1199	25	25	2375	2507	32029	12326	32029	12326	06mar_Diogo_NEK1_cpt_1	7241	32029	12326	06mar_Diogo_NEK1_cpt_1
NaN	NaN	NaN	27.7737	NaN	NaN			___3	NaN	NaN	NaN	0.997222	0	0	>sp|A4D2B8|PM2P1_HUMAN Putative postmeiotic segregation increased 2-like protein 1 OS=Homo sapiens GN=PMS2P1 PE=5 SV=1;>sp|A4D2B8-2|PM2P1_HUMAN Isoform 2 of Putative postmeiotic segregation increased 2-like protein 1 OS=Homo sapiens GN=PMS2P1;>sp|A4D2B8-3|PM2P1_HUMAN Isoform 3 of Putative postmeiotic segregation increased 2-like protein 1 OS=Homo sapiens GN=PMS2P1	117;117;117	GIHARPRRRATTSLLTLLLAFGKNAVRCALI	0.997222	21.1743		3	T	X;X;X;X;X;X;X;X;X;X;Phospho (STY);Phospho (STY);X;X;X;Phospho (STY);X;X;X;X;X;X;X;X;X;X;X;X;X;X;X	XXXXXXXXPPPPPPPPPPPPPPPXXXXXXXX	0.0406986	40.941	40.941	_RAT(ph)T(ph)SLLT(ph)LLLAFGK_	RAT(0.731)T(0.636)S(0.636)LLT(0.997)LLLAFGK	RAT(1.31)T(0)S(0)LLT(21.17)LLLAFGK	8	2	922.94	0.342	379	3	117	117	3735	3994	48895	17312	48895	17312	06mar_Diogo_NEK1_cpt_1	7761	48895	17312	06mar_Diogo_NEK1_cpt_1
NaN	NaN	NaN	NaN	NaN	24.5466			___3	NaN	NaN	NaN	0	0	1	>sp|O43314|VIP2_HUMAN Inositol hexakisphosphate and diphosphoinositol-pentakisphosphate kinase 2 OS=Homo sapiens GN=PPIP5K2 PE=1 SV=3;>sp|O43314-2|VIP2_HUMAN Isoform 2 of Inositol hexakisphosphate and diphosphoinositol-pentakisphosphate kinase 2 OS=Homo sapiens GN=PPIP5K2	674;674	PVKTCDKVYSLIQSLTSQIRHRMEDPKSSDI	1	50.0775		5	T	X;X;X;X;X;X;X;X;Phospho (STY);Phospho (STY);X;X;X;Phospho (STY);X;Phospho (STY);Phospho (STY);X;X;X;X;X;X;X;X;X;X;X;X;X;X	XXXXXXXPPPPPPPPPPPPPXXXXXXXXXXX	0.0426581	50.077	50.077	_VY(ph)S(ph)LIQS(ph)LT(ph)S(ph)QIR_	VY(1)S(1)LIQS(1)LT(1)S(1)QIR	VY(50.08)S(50.08)LIQS(50.08)LT(50.08)S(50.08)QIR	9	2	954.343	-1.9698	394	58	674	674	5005	5355	64732	22238	64732	22238	25abril_Diogo_C+_A3	3470	64732	22238	25abril_Diogo_C+_A3
NaN	NaN	NaN	24.0789	NaN	23.5918			___3	NaN	NaN	NaN	0.999995	0	0	>sp|P21728|DRD1_HUMAN D(1A) dopamine receptor OS=Homo sapiens GN=DRD1 PE=1 SV=1	12	____MRTLNTSAMDGTGLVVERDFSVRILTA	0.999995	47.9808		3	T	X;X;X;X;X;X;Phospho (STY);X;X;Phospho (STY);X;X;Oxidation (M);X;X;Phospho (STY);X;X;X;X;X;X;X;X;X;X;X;X;X;X;X	XXXXXXPPPPPPPPPPPPPPPPXXXXXXXXX	0.0220398	51.643	51.643	_T(ph)LNT(ph)SAM(ox)DGT(ph)GLVVER_	T(0.667)LNT(0.667)S(0.667)AMDGT(1)GLVVER	T(0)LNT(0)S(0)AMDGT(47.98)GLVVER	10	3	640.58	1.6172	436	298	12	12	4418	4731	58375;58376;58377;58378;58379	20405	58375	20405	06mar_Diogo_NEK1_cpt_1	2216	58375	20405	06mar_Diogo_NEK1_cpt_1
NaN	NaN	NaN	NaN	NaN	20.9733			___3	NaN	NaN	NaN	0.986498	0	0	>sp|Q6P0Q8|MAST2_HUMAN Microtubule-associated serine/threonine-protein kinase 2 OS=Homo sapiens GN=MAST2 PE=1 SV=2;>sp|Q6P0Q8-2|MAST2_HUMAN Isoform 2 of Microtubule-associated serine/threonine-protein kinase 2 OS=Homo sapiens GN=MAST2;>tr|E7ERL6|E7ERL6_HUMAN Microtubule-associated serine/threonine-protein kinase 2 OS=Homo sapiens GN=MAST2 PE=2 SV=1	185;185;185	TSNRKSLIVTSSTSPTLPRPHSPLHGHTGNS	0.986498	19.0384		3	T	X;X;X;X;X;Phospho (STY);X;X;X;X;X;X;Phospho (STY);Phospho (STY);X;Phospho (STY);X;X;X;X;X;X;X;X;X;X;X;X;X;X;X	XXXXPPPPPPPPPPPPPPPXXXXXXXXXXXX	0.00548902	92.457	87.083	_KS(ph)LIVTSSTS(ph)PT(ph)LPR_	KS(0.812)LIVT(0.187)S(0.002)S(0.014)T(0.131)S(0.869)PT(0.986)LPR	KS(6.34)LIVT(-6.34)S(-26.89)S(-19.04)T(-8.58)S(8.58)PT(19.04)LPR	12	2	913.909	-3.622	496	745	185	185	2368	2500	31999;32000;32001;32002;32003;32004;32005;32006;32007;32008	12305;12306;12307	32001	12307	24abril_Diogo_C+_D1	4754	31999	12305	27mar_Diogo_CPT-_3D
NaN	NaN	NaN	NaN	NaN	18.56			___3	NaN	NaN	NaN	0	0	1	>sp|Q6P4F1-2|FUT10_HUMAN Isoform 2 of Alpha-(1,3)-fucosyltransferase 10 OS=Homo sapiens GN=FUT10;>sp|Q6P4F1|FUT10_HUMAN Alpha-(1,3)-fucosyltransferase 10 OS=Homo sapiens GN=FUT10 PE=2 SV=2;>sp|Q6P4F1-6|FUT10_HUMAN Isoform 6 of Alpha-(1,3)-fucosyltransferase 10 OS=Homo sapiens GN=FUT10;>sp|Q6P4F1-5|FUT10_HUMAN Isoform 5 of Alpha-(1,3)-fucosyltransferase 10 OS=Homo sapiens GN=FUT10;>sp|Q6P4F1-4|FUT…	153;112;84;112;84;61	LGQCGADACFFTINRTYLHHHMTKAFLFYGT	1	40.3516		3	T	X;X;X;X;X;X;X;X;X;X;X;X;X;X;X;Phospho (STY);Phospho (STY);X;X;X;X;Oxidation (M);Phospho (STY);X;X;X;X;X;X;X;X	XXXXXXXXXXXXXXXPPPPPPPPPXXXXXXX	0.0387688	40.352	40.352	_T(ph)Y(ph)LHHHM(ox)T(ph)K_	T(1)Y(1)LHHHMT(1)K	T(40.35)Y(40.35)LHHHMT(40.35)K	1	3	475.16	-0.56288	497	753	153	153	4578	4900	60208	20899	60208	20899	08mar_Diogo_NEK1_cpt3_rep	10653	60208	20899	08mar_Diogo_NEK1_cpt3_rep
NaN	NaN	NaN	NaN	NaN	18.56			___3	NaN	NaN	NaN	0	0	1	>sp|Q6P4F1-2|FUT10_HUMAN Isoform 2 of Alpha-(1,3)-fucosyltransferase 10 OS=Homo sapiens GN=FUT10;>sp|Q6P4F1|FUT10_HUMAN Alpha-(1,3)-fucosyltransferase 10 OS=Homo sapiens GN=FUT10 PE=2 SV=2;>sp|Q6P4F1-6|FUT10_HUMAN Isoform 6 of Alpha-(1,3)-fucosyltransferase 10 OS=Homo sapiens GN=FUT10;>sp|Q6P4F1-5|FUT10_HUMAN Isoform 5 of Alpha-(1,3)-fucosyltransferase 10 OS=Homo sapiens GN=FUT10;>sp|Q6P4F1-4|FUT…	160;119;91;119;91;68	ACFFTINRTYLHHHMTKAFLFYGTDFNIDSL	1	40.3516		3	T	X;X;X;X;X;X;X;X;Phospho (STY);Phospho (STY);X;X;X;X;Oxidation (M);Phospho (STY);X;X;X;X;X;X;X;X;X;X;X;X;X;X;X	XXXXXXXXPPPPPPPPPXXXXXXXXXXXXXX	0.0387688	40.352	40.352	_T(ph)Y(ph)LHHHM(ox)T(ph)K_	T(1)Y(1)LHHHMT(1)K	T(40.35)Y(40.35)LHHHMT(40.35)K	8	3	475.16	-0.56288	498	753	160	160	4578	4900	60208	20899	60208	20899	08mar_Diogo_NEK1_cpt3_rep	10653	60208	20899	08mar_Diogo_NEK1_cpt3_rep
NaN	NaN	NaN	20.664	NaN	NaN			___3	NaN	NaN	NaN	0.763046	0	0	>sp|Q86TM6|SYVN1_HUMAN E3 ubiquitin-protein ligase synoviolin OS=Homo sapiens GN=SYVN1 PE=1 SV=2;>sp|Q86TM6-3|SYVN1_HUMAN Isoform 3 of E3 ubiquitin-protein ligase synoviolin OS=Homo sapiens GN=SYVN1;>sp|Q86TM6-2|SYVN1_HUMAN Isoform 2 of E3 ubiquitin-protein ligase synoviolin OS=Homo sapiens GN=SYVN1;>tr|E9PK19|E9PK19_HUMAN E3 ubiquitin-protein ligase synoviolin (Fragment) OS=Homo sapiens GN=SYVN1…	15;15;15;15;15	_MFRTAVMMAASLALTGAVVAHAYYLKHQFY	0.763046	9.40938		3	T	X;Oxidation (M);X;X;X;X;X;Oxidation (M);X;X;X;X;X;X;X;Phospho (STY);X;X;X;X;X;X;X;X;X;X;X;X;X;X;X	XPPPPPPPPPPPPPPPPPPPPPPPPPPPPPP	0.0282319	33.072	33.072	_M(ox)FRTAVM(ox)MAASLALT(ph)GAVVAHAYYLKHQFYPT(ph)VVYLT(ph)K_	MFRT(0.04)AVMMAAS(0.099)LALT(0.763)GAVVAHAY(0.104)Y(0.142)LKHQFY(0.441)PT(0.456)VVY(0.465)LT(0.491)K	MFRT(-14.04)AVMMAAS(-9.41)LALT(9.41)GAVVAHAY(-9.18)Y(-9.18)LKHQFY(-0.28)PT(0.28)VVY(-0.28)LT(0.28)K	15	4	1134.54	1.8954	509	790	15	15	3091	3274	41037	14965	41037	14965	06mar_Diogo_NEK1_cpt_1	9964	41037	14965	06mar_Diogo_NEK1_cpt_1
NaN	NaN	NaN	NaN	NaN	23.8866			___3	NaN	NaN	NaN	0	0	0.999788	>sp|Q8NI77|KI18A_HUMAN Kinesin-like protein KIF18A OS=Homo sapiens GN=KIF18A PE=1 SV=2	215	SEEILHLLDNGNKNRTQHPTDMNATSSRSHA	0.999788	37.1543		3	T	X;X;X;X;X;X;X;X;X;X;X;X;X;X;X;Phospho (STY);X;X;X;Phospho (STY);X;X;X;X;Phospho (STY);X;X;X;X;X;X	XXXXXXXXXXXXXPPPPPPPPPPPPPPPXXX	0.0257655	67.644	67.644	_NRT(ph)QHPT(ph)DMNAT(ph)SSR_	NRT(1)QHPT(0.997)DMNAT(0.832)S(0.15)S(0.021)R	NRT(37.15)QHPT(24.61)DMNAT(7.51)S(-7.51)S(-16.03)R	3	2	978.347	0.38691	526	855	215	215	3479	3726	45764	16221	45764	16221	25abril_Diogo_C+_C3	3422	45764	16221	25abril_Diogo_C+_C3
NaN	NaN	NaN	NaN	NaN	23.8866			___3	NaN	NaN	NaN	0	0	0.996953	>sp|Q8NI77|KI18A_HUMAN Kinesin-like protein KIF18A OS=Homo sapiens GN=KIF18A PE=1 SV=2	219	LHLLDNGNKNRTQHPTDMNATSSRSHAVFQI	0.996953	24.6136		3	T	X;X;X;X;X;X;X;X;X;X;X;Phospho (STY);X;X;X;Phospho (STY);X;X;X;X;Phospho (STY);X;X;X;X;X;X;X;X;X;X	XXXXXXXXXPPPPPPPPPPPPPPPXXXXXXX	0.0257655	67.644	67.644	_NRT(ph)QHPT(ph)DMNAT(ph)SSR_	NRT(1)QHPT(0.997)DMNAT(0.832)S(0.15)S(0.021)R	NRT(37.15)QHPT(24.61)DMNAT(7.51)S(-7.51)S(-16.03)R	7	2	978.347	0.38691	527	855	219	219	3479	3726	45764	16221	45764	16221	25abril_Diogo_C+_C3	3422	45764	16221	25abril_Diogo_C+_C3
NaN	NaN	NaN	NaN	NaN	23.8866			___3	NaN	NaN	NaN	0	0	0.832145	>sp|Q8NI77|KI18A_HUMAN Kinesin-like protein KIF18A OS=Homo sapiens GN=KIF18A PE=1 SV=2	224	NGNKNRTQHPTDMNATSSRSHAVFQIYLRQQ	0.832145	7.50997		3	T	X;X;X;X;X;X;Phospho (STY);X;X;X;Phospho (STY);X;X;X;X;Phospho (STY);X;X;X;X;X;X;X;X;X;X;X;X;X;X;X	XXXXPPPPPPPPPPPPPPPXXXXXXXXXXXX	0.0257655	67.644	67.644	_NRT(ph)QHPT(ph)DMNAT(ph)SSR_	NRT(1)QHPT(0.997)DMNAT(0.832)S(0.15)S(0.021)R	NRT(37.15)QHPT(24.61)DMNAT(7.51)S(-7.51)S(-16.03)R	12	2	978.347	0.38691	528	855	224	224	3479	3726	45764	16221	45764	16221	25abril_Diogo_C+_C3	3422	45764	16221	25abril_Diogo_C+_C3
NaN	NaN	NaN	22.1243	23.6972	NaN			___3	NaN	NaN	NaN	0	0.999566	0	>sp|Q9C0A1|ZFHX2_HUMAN Zinc finger homeobox protein 2 OS=Homo sapiens GN=ZFHX2 PE=2 SV=3	1052	ECVEKLLLVATTVEMTFTTKVLSAPTLSPLD	0.999566	30.6006		4	T	X;X;X;X;X;X;X;X;X;X;Phospho (STY);X;X;X;X;Phospho (STY);X;Phospho (STY);Phospho (STY);X;X;X;X;X;X;X;X;X;X;X;X	XXXXXPPPPPPPPPPPPPPPXXXXXXXXXXX	0.0216752	49.423	49.423	_LLLVAT(ph)TVEMT(ph)FT(ph)T(ph)K_	LLLVAT(0.502)T(0.502)VEMT(1)FT(0.999)T(0.999)K	LLLVAT(0)T(0)VEMT(30.6)FT(25.49)T(25.47)K	11	3	663.27	-2.5514	574	986	1052	1052	2711	2866	37482;37483;37484;37485;37486;37487	13989	37482	13989	06mar_Diogo_NEK1_cpt_2	5482	37482	13989	06mar_Diogo_NEK1_cpt_2
NaN	NaN	NaN	22.1243	23.6972	NaN			___3	NaN	NaN	NaN	0	0.998592	0	>sp|Q9C0A1|ZFHX2_HUMAN Zinc finger homeobox protein 2 OS=Homo sapiens GN=ZFHX2 PE=2 SV=3	1054	VEKLLLVATTVEMTFTTKVLSAPTLSPLDNG	0.998592	25.4892		4	T	X;X;X;X;X;X;X;X;Phospho (STY);X;X;X;X;Phospho (STY);X;Phospho (STY);Phospho (STY);X;X;X;X;X;X;X;X;X;X;X;X;X;X	XXXPPPPPPPPPPPPPPPXXXXXXXXXXXXX	0.0216752	49.423	49.423	_LLLVAT(ph)TVEMT(ph)FT(ph)T(ph)K_	LLLVAT(0.502)T(0.502)VEMT(1)FT(0.999)T(0.999)K	LLLVAT(0)T(0)VEMT(30.6)FT(25.49)T(25.47)K	13	3	663.27	-2.5514	575	986	1054	1054	2711	2866	37482;37483;37484;37485;37486;37487	13989	37482	13989	06mar_Diogo_NEK1_cpt_2	5482	37482	13989	06mar_Diogo_NEK1_cpt_2
NaN	NaN	NaN	22.1243	23.6972	NaN			___3	NaN	NaN	NaN	0	0.998585	0	>sp|Q9C0A1|ZFHX2_HUMAN Zinc finger homeobox protein 2 OS=Homo sapiens GN=ZFHX2 PE=2 SV=3	1055	EKLLLVATTVEMTFTTKVLSAPTLSPLDNGQ	0.998585	25.4672		4	T	X;X;X;X;X;X;X;Phospho (STY);X;X;X;X;Phospho (STY);X;Phospho (STY);Phospho (STY);X;X;X;X;X;X;X;X;X;X;X;X;X;X;X	XXPPPPPPPPPPPPPPPXXXXXXXXXXXXXX	0.0216752	49.423	49.423	_LLLVAT(ph)TVEMT(ph)FT(ph)T(ph)K_	LLLVAT(0.502)T(0.502)VEMT(1)FT(0.999)T(0.999)K	LLLVAT(0)T(0)VEMT(30.6)FT(25.49)T(25.47)K	14	3	663.27	-2.5514	576	986	1055	1055	2711	2866	37482;37483;37484;37485;37486;37487	13989	37482	13989	06mar_Diogo_NEK1_cpt_2	5482	37482	13989	06mar_Diogo_NEK1_cpt_2
NaN	NaN	NaN	NaN	18.8787	NaN			___3	NaN	NaN	NaN	0	0.948627	0	>sp|Q9H939-2|PPIP2_HUMAN Isoform 2 of Proline-serine-threonine phosphatase-interacting protein 2 OS=Homo sapiens GN=PSTPIP2	291	EDPSQFLKAHQMIPITLWLMTTVCSISKINE	0.948627	10.1222		3	T	X;X;X;X;X;X;X;X;X;X;X;Oxidation (M);X;X;X;Phospho (STY);X;X;X;X;Phospho (STY);Phospho (STY);X;X;X;X;X;X;X;X;X	XXXXXXXXPPPPPPPPPPPPPPPPPPPPXXX	0.0424237	35.32	35.32	_AHQM(ox)IPIT(ph)LWLMT(ph)T(ph)VCSISK_	AHQMIPIT(0.949)LWLMT(0.819)T(0.471)VCS(0.414)IS(0.347)K	AHQMIPIT(10.12)LWLMT(6.92)T(0.9)VCS(-0.9)IS(-1.49)K	8	4	647.281	2.0956	589	1018	291	291	206	217	3171	1336	3171	1336	06mar_Diogo_NEK1_cpt_2	8404	3171	1336	06mar_Diogo_NEK1_cpt_2
NaN	NaN	NaN	NaN	18.8787	NaN			___3	NaN	NaN	NaN	0	0.819321	0	>sp|Q9H939-2|PPIP2_HUMAN Isoform 2 of Proline-serine-threonine phosphatase-interacting protein 2 OS=Homo sapiens GN=PSTPIP2	296	FLKAHQMIPITLWLMTTVCSISKINETRAFS	0.819321	6.91681		3	T	X;X;X;X;X;X;Oxidation (M);X;X;X;Phospho (STY);X;X;X;X;Phospho (STY);Phospho (STY);X;X;X;X;X;X;X;X;X;X;X;X;X;X	XXXPPPPPPPPPPPPPPPPPPPPXXXXXXXX	0.0424237	35.32	35.32	_AHQM(ox)IPIT(ph)LWLMT(ph)T(ph)VCSISK_	AHQMIPIT(0.949)LWLMT(0.819)T(0.471)VCS(0.414)IS(0.347)K	AHQMIPIT(10.12)LWLMT(6.92)T(0.9)VCS(-0.9)IS(-1.49)K	13	4	647.281	2.0956	590	1018	296	296	206	217	3171	1336	3171	1336	06mar_Diogo_NEK1_cpt_2	8404	3171	1336	06mar_Diogo_NEK1_cpt_2
NaN	NaN	NaN	NaN	NaN	24.5466			___3	NaN	NaN	NaN	0	0	1	>sp|O43314|VIP2_HUMAN Inositol hexakisphosphate and diphosphoinositol-pentakisphosphate kinase 2 OS=Homo sapiens GN=PPIP5K2 PE=1 SV=3;>sp|O43314-2|VIP2_HUMAN Isoform 2 of Inositol hexakisphosphate and diphosphoinositol-pentakisphosphate kinase 2 OS=Homo sapiens GN=PPIP5K2	667;667	SMHLIKNPVKTCDKVYSLIQSLTSQIRHRME	1	50.0775		5	Y	X;X;X;X;X;X;X;X;X;X;X;X;X;X;X;Phospho (STY);Phospho (STY);X;X;X;Phospho (STY);X;Phospho (STY);Phospho (STY);X;X;X;X;X;X;X	XXXXXXXXXXXXXXPPPPPPPPPPPPPXXXX	0.0426581	50.077	50.077	_VY(ph)S(ph)LIQS(ph)LT(ph)S(ph)QIR_	VY(1)S(1)LIQS(1)LT(1)S(1)QIR	VY(50.08)S(50.08)LIQS(50.08)LT(50.08)S(50.08)QIR	2	2	954.343	-1.9698	717	58	667	667	5005	5355	64732	22238	64732	22238	25abril_Diogo_C+_A3	3470	64732	22238	25abril_Diogo_C+_A3
NaN	NaN	NaN	NaN	18.3133	NaN			___3	NaN	NaN	NaN	0	0.977062	0	>sp|P29371|NK3R_HUMAN Neuromedin-K receptor OS=Homo sapiens GN=TACR3 PE=1 SV=1	333	YFILTAIYQQLNRWKYIQQVYLASFWLAMSS	0.977062	15.5452		5	Y	X;X;X;X;X;X;X;X;X;X;X;X;X;X;X;Phospho (STY);X;X;X;X;X;X;X;Phospho (STY);X;X;X;X;X;Phospho (STY);Phospho (STY)	XXXXXXXXXXXXXXXPPPPPPPPPPPPPPPP	0.0331714	33.414	33.414	_Y(ph)IQQVYLAS(ph)FWLAMS(ph)S(ph)TM(ox)Y(ph)NPIIYCCLNK_	Y(0.977)IQQVY(0.274)LAS(0.737)FWLAMS(0.663)S(0.663)T(0.666)MY(0.771)NPIIY(0.248)CCLNK	Y(15.55)IQQVY(-5.99)LAS(5.09)FWLAMS(0)S(0)T(0)MY(5.69)NPIIY(-5.69)CCLNK	1	4	999.138	-0.02898	735	334	333	333	5106	5459	65785	22538	65785	22538	06mar_Diogo_NEK1_cpt_2	10941	65785	22538	06mar_Diogo_NEK1_cpt_2
NaN	NaN	NaN	NaN	18.3133	NaN			___3	NaN	NaN	NaN	0	0.771449	0	>sp|P29371|NK3R_HUMAN Neuromedin-K receptor OS=Homo sapiens GN=TACR3 PE=1 SV=1	351	QVYLASFWLAMSSTMYNPIIYCCLNKRFRAG	0.771449	5.69255		5	Y	X;X;X;X;X;Phospho (STY);X;X;X;X;X;Phospho (STY);Phospho (STY);X;Oxidation (M);Phospho (STY);X;X;X;X;X;X;X;X;X;X;X;X;X;X;X	PPPPPPPPPPPPPPPPPPPPPPPPPPXXXXX	0.0331714	33.414	33.414	_Y(ph)IQQVYLAS(ph)FWLAMS(ph)S(ph)TM(ox)Y(ph)NPIIYCCLNK_	Y(0.977)IQQVY(0.274)LAS(0.737)FWLAMS(0.663)S(0.663)T(0.666)MY(0.771)NPIIY(0.248)CCLNK	Y(15.55)IQQVY(-5.99)LAS(5.09)FWLAMS(0)S(0)T(0)MY(5.69)NPIIY(-5.69)CCLNK	19	4	999.138	-0.02898	736	334	351	351	5106	5459	65785	22538	65785	22538	06mar_Diogo_NEK1_cpt_2	10941	65785	22538	06mar_Diogo_NEK1_cpt_2
NaN	NaN	NaN	NaN	NaN	18.56			___3	NaN	NaN	NaN	0	0	1	>sp|Q6P4F1-2|FUT10_HUMAN Isoform 2 of Alpha-(1,3)-fucosyltransferase 10 OS=Homo sapiens GN=FUT10;>sp|Q6P4F1|FUT10_HUMAN Alpha-(1,3)-fucosyltransferase 10 OS=Homo sapiens GN=FUT10 PE=2 SV=2;>sp|Q6P4F1-6|FUT10_HUMAN Isoform 6 of Alpha-(1,3)-fucosyltransferase 10 OS=Homo sapiens GN=FUT10;>sp|Q6P4F1-5|FUT10_HUMAN Isoform 5 of Alpha-(1,3)-fucosyltransferase 10 OS=Homo sapiens GN=FUT10;>sp|Q6P4F1-4|FUT…	154;113;85;113;85;62	GQCGADACFFTINRTYLHHHMTKAFLFYGTD	1	40.3516	+	3	Y	X;X;X;X;X;X;X;X;X;X;X;X;X;X;Phospho (STY);Phospho (STY);X;X;X;X;Oxidation (M);Phospho (STY);X;X;X;X;X;X;X;X;X	XXXXXXXXXXXXXXPPPPPPPPPXXXXXXXX	0.0387688	40.352	40.352	_T(ph)Y(ph)LHHHM(ox)T(ph)K_	T(1)Y(1)LHHHMT(1)K	T(40.35)Y(40.35)LHHHMT(40.35)K	2	3	475.16	-0.56288	769	753	154	154	4578	4900	60208	20899	60208	20899	08mar_Diogo_NEK1_cpt3_rep	10653	60208	20899	08mar_Diogo_NEK1_cpt3_rep
NaN	NaN	NaN	24.5489	NaN	NaN			___3	NaN	NaN	NaN	0.969696	0	0	>tr|B4DN34|B4DN34_HUMAN 39S ribosomal protein L48, mitochondrial OS=Homo sapiens GN=MRPL48 PE=2 SV=1	19	SSCRKTSSGLPLILHYGGILLSISRPYKTKP	0.969696	14.6382		4	Y	X;X;X;X;X;X;Phospho (STY);Phospho (STY);X;X;X;X;X;X;X;Phospho (STY);X;X;X;X;X;Phospho (STY);X;X;X;X;X;X;X;X;X	XXXXPPPPPPPPPPPPPPPPPPPPPXXXXXX	0.0407745	34.236	34.236	_KTS(ph)S(ph)GLPLILHY(ph)GGILLS(ph)ISR_	KT(0.651)S(0.675)S(0.675)GLPLILHY(0.97)GGILLS(0.805)IS(0.223)R	KT(-0.32)S(0.32)S(0.32)GLPLILHY(14.64)GGILLS(6.05)IS(-6.05)R	12	3	849.061	1.7586	843	1199	19	19	2375	2507	32029	12326	32029	12326	06mar_Diogo_NEK1_cpt_1	7241	32029	12326	06mar_Diogo_NEK1_cpt_1
[truncated: 6 more columns]

## Sheet: Table S5
Table S5. Node attributes from human NEK1 network without cisplatin. Enriched GO Biological Processes (Enriched BP) are depicted with a p-value in parentheses for each protein in the network. The selected most relevant GO biological processes (Selected BP) from the ones with the lowest p-values for each protein in the network (Top Enriched BP) are also depicted. Only enriched terms with p ≤ 0.05 …
UniProt ID	Gene	Top Enriched BP	p-value (Top Enriched BP)	Enriched BP	Selected BP
P0CG48	UBC	gene expression	6.7419e-138	activation of MAPK activity(4.09889172460732e-08);anaphase-promoting complex-dependent proteasomal ubiquitin-dependent protein catabolic process(3.27380572874093e-80);antigen processing and presentation of exogenous peptide antigen via MHC class I(9.64465771579562e-64);antigen processing and presentation of exogenous peptide antigen via MHC class I, TAP-dependent(2.1101067617002e-64);antigen proc…	gene expression
P62195	PSMC5	gene expression	6.7419e-138	anaphase-promoting complex-dependent proteasomal ubiquitin-dependent protein catabolic process(3.27380572874093e-80);antigen processing and presentation of exogenous peptide antigen via MHC class I(9.64465771579562e-64);antigen processing and presentation of exogenous peptide antigen via MHC class I, TAP-dependent(2.1101067617002e-64);antigen processing and presentation of peptide antigen via MHC…	gene expression
Q9HAU5	UPF2	gene expression	6.7419e-138	gene expression(6.74190124741094e-138);liver development(2.68222853381673e-06);mRNA export from nucleus(7.8491808330921e-16);mRNA metabolic process(2.33930640299256e-88);nuclear-transcribed mRNA catabolic process, nonsense-mediated decay(1.06326505616622e-06);organ regeneration(0.000404364044520992);RNA metabolic process(1.53330226583338e-87)	gene expression
Q16539	MAPK14	gene expression	6.7419e-138	3_-UTR-mediated mRNA stabilization(2.72886322460709e-08);activation of MAPK activity(4.09889172460732e-08);angiogenesis(0.000544790896675294);apoptotic process(1.60956479031183e-71);blood coagulation(1.95256501598454e-26);cartilage condensation(0.0921866052699077);cell morphogenesis(0.0468259682720699);cell surface receptor signaling pathway(5.13629142650821e-05);cellular component movement(0.004…	gene expression
P55769	NHP2L1	gene expression	6.7419e-138	gene expression(6.74190124741094e-138);mRNA splicing, via spliceosome(5.44717536491439e-43);ribosome biogenesis(0.136405341633049);RNA splicing(5.31405344997076e-48)	gene expression
P52272	HNRNPM	gene expression	6.7419e-138	alternative mRNA splicing, via spliceosome(0.00110498673958027);gene expression(6.74190124741094e-138);mRNA splicing, via spliceosome(5.44717536491439e-43);RNA splicing(5.31405344997076e-48)	gene expression
Q06323	PSME1	gene expression	6.7419e-138	anaphase-promoting complex-dependent proteasomal ubiquitin-dependent protein catabolic process(3.27380572874093e-80);antigen processing and presentation of exogenous peptide antigen via MHC class I(9.64465771579562e-64);antigen processing and presentation of exogenous peptide antigen via MHC class I, TAP-dependent(2.1101067617002e-64);antigen processing and presentation of peptide antigen via MHC…	gene expression
Q15008	PSMD6	gene expression	6.7419e-138	anaphase-promoting complex-dependent proteasomal ubiquitin-dependent protein catabolic process(3.27380572874093e-80);antigen processing and presentation of exogenous peptide antigen via MHC class I(9.64465771579562e-64);antigen processing and presentation of exogenous peptide antigen via MHC class I, TAP-dependent(2.1101067617002e-64);antigen processing and presentation of peptide antigen via MHC…	gene expression
Q9H9A5	CNOT10	gene expression	6.7419e-138	gene expression(6.74190124741094e-138);gene silencing by RNA(8.04995619123631e-08);mRNA metabolic process(2.33930640299256e-88);nuclear-transcribed mRNA catabolic process, deadenylation-dependent decay(6.47984706390392e-14);nuclear-transcribed mRNA poly(A) tail shortening(3.94369002421323e-08);regulation of transcription, DNA-dependent(1.22901328835568e-09);regulation of translation(3.49813141160…	gene expression
Q9ULM6	CNOT6	gene expression	6.7419e-138	exonucleolytic nuclear-transcribed mRNA catabolic process involved in deadenylation-dependent decay(1.85792058305937e-10);gene expression(6.74190124741094e-138);gene silencing by miRNA(0.000111953336075735);mRNA metabolic process(2.33930640299256e-88);nuclear-transcribed mRNA catabolic process, deadenylation-dependent decay(6.47984706390392e-14);nuclear-transcribed mRNA catabolic process, no-go d…	gene expression
P61289	PSME3	gene expression	6.7419e-138	anaphase-promoting complex-dependent proteasomal ubiquitin-dependent protein catabolic process(3.27380572874093e-80);antigen processing and presentation of exogenous peptide antigen via MHC class I(9.64465771579562e-64);antigen processing and presentation of exogenous peptide antigen via MHC class I, TAP-dependent(2.1101067617002e-64);antigen processing and presentation of peptide antigen via MHC…	gene expression
P49720	PSMB3	gene expression	6.7419e-138	anaphase-promoting complex-dependent proteasomal ubiquitin-dependent protein catabolic process(3.27380572874093e-80);antigen processing and presentation of exogenous peptide antigen via MHC class I(9.64465771579562e-64);antigen processing and presentation of exogenous peptide antigen via MHC class I, TAP-dependent(2.1101067617002e-64);antigen processing and presentation of peptide antigen via MHC…	gene expression
Q13868	EXOSC2	gene expression	6.7419e-138	exonucleolytic nuclear-transcribed mRNA catabolic process involved in deadenylation-dependent decay(1.85792058305937e-10);gene expression(6.74190124741094e-138);mRNA metabolic process(2.33930640299256e-88);nuclear-transcribed mRNA catabolic process, deadenylation-dependent decay(6.47984706390392e-14);positive regulation of cell growth(1.18087925460409e-05);RNA metabolic process(1.53330226583338e-…	gene expression
P25786	PSMA1	gene expression	6.7419e-138	anaphase-promoting complex-dependent proteasomal ubiquitin-dependent protein catabolic process(3.27380572874093e-80);antigen processing and presentation of exogenous peptide antigen via MHC class I(9.64465771579562e-64);antigen processing and presentation of exogenous peptide antigen via MHC class I, TAP-dependent(2.1101067617002e-64);antigen processing and presentation of peptide antigen via MHC…	gene expression
Q9NPD3	EXOSC4	gene expression	6.7419e-138	defense response to virus(0.000553563081713337);DNA deamination(4.50274066597163e-05);exonucleolytic nuclear-transcribed mRNA catabolic process involved in deadenylation-dependent decay(1.85792058305937e-10);gene expression(6.74190124741094e-138);histone mRNA catabolic process(2.43064457541219e-06);maturation of 5.8S rRNA(4.09560007362023e-07);mRNA metabolic process(2.33930640299256e-88);nuclear …	gene expression
P62826	RAN	gene expression	6.7419e-138	androgen receptor signaling pathway(8.93821162758304e-06);DNA metabolic process(0.136405341633049);gene expression(6.74190124741094e-138);intracellular transport of viral material(1.35126634195994e-05);mitosis(2.87144545142622e-13);mitotic spindle organization(1.9150582342875e-05);positive regulation of protein binding(1.2512947737039e-06);positive regulation of transcription, DNA-dependent(1.468…	gene expression
O15160	POLR1C	gene expression	6.7419e-138	gene expression(6.74190124741094e-138);innate immune response(1.94352580596968e-36);positive regulation of type I interferon production(1.15491687961065e-14);termination of RNA polymerase I transcription(5.6694519614562e-07);termination of RNA polymerase III transcription(1.26832010987357e-09);transcription elongation from RNA polymerase I promoter(3.21948839417254e-07);transcription elongation f…	gene expression
Q504Q3	PAN2	gene expression	6.7419e-138	gene expression(6.74190124741094e-138);mRNA metabolic process(2.33930640299256e-88);nuclear-transcribed mRNA catabolic process, deadenylation-dependent decay(6.47984706390392e-14);nuclear-transcribed mRNA poly(A) tail shortening(3.94369002421323e-08);RNA metabolic process(1.53330226583338e-87);RNA phosphodiester bond hydrolysis, exonucleolytic(1.60376223173401e-17)	gene expression
Q9HAV4	XPO5	gene expression	6.7419e-138	gene expression(6.74190124741094e-138);gene silencing by RNA(8.04995619123631e-08);protein export from nucleus(1.44359328255511e-05)	gene expression
P55036	PSMD4	gene expression	6.7419e-138	anaphase-promoting complex-dependent proteasomal ubiquitin-dependent protein catabolic process(3.27380572874093e-80);antigen processing and presentation of exogenous peptide antigen via MHC class I(9.64465771579562e-64);antigen processing and presentation of exogenous peptide antigen via MHC class I, TAP-dependent(2.1101067617002e-64);antigen processing and presentation of peptide antigen via MHC…	gene expression
P20618	PSMB1	gene expression	6.7419e-138	anaphase-promoting complex-dependent proteasomal ubiquitin-dependent protein catabolic process(3.27380572874093e-80);antigen processing and presentation of exogenous peptide antigen via MHC class I(9.64465771579562e-64);antigen processing and presentation of exogenous peptide antigen via MHC class I, TAP-dependent(2.1101067617002e-64);antigen processing and presentation of peptide antigen via MHC…	gene expression
O14980	XPO1	gene expression	6.7419e-138	gene expression(6.74190124741094e-138);intracellular transport of viral material(1.35126634195994e-05);mitotic cell cycle(1.03786257064852e-97);mRNA metabolic process(2.33930640299256e-88);mRNA transport(8.14144975279126e-08);negative regulation of transcription from RNA polymerase II promoter(5.96926349567125e-28);negative regulation of transforming growth factor beta receptor signaling pathway(…	gene expression
P52597	HNRNPF	gene expression	6.7419e-138	gene expression(6.74190124741094e-138);mRNA splicing, via spliceosome(5.44717536491439e-43);regulation of RNA splicing(0.113927824706033);RNA processing(0.000141848696658695);RNA splicing(5.31405344997076e-48)	gene expression
O14802	POLR3A	gene expression	6.7419e-138	defense response to virus(0.000553563081713337);gene expression(6.74190124741094e-138);innate immune response(1.94352580596968e-36);positive regulation of interferon-beta production(0.0667676385247506);positive regulation of type I interferon production(1.15491687961065e-14);termination of RNA polymerase III transcription(1.26832010987357e-09);transcription elongation from RNA polymerase III prom…	gene expression
P09651	HNRNPA1	gene expression	6.7419e-138	alternative mRNA splicing, via spliceosome(0.00110498673958027);cell death(6.0225493817458e-07);gene expression(6.74190124741094e-138);mRNA processing(1.72921648580983e-19);mRNA splicing, via spliceosome(5.44717536491439e-43);mRNA transport(8.14144975279126e-08);nuclear export(0.0268339123440405);nuclear import(0.00548603821606595);RNA export from nucleus(2.25754740147825e-05);RNA splicing(5.3140…	gene expression
Q9UHI6	DDX20	gene expression	6.7419e-138	ATP catabolic process(7.53610798013254e-16);gene expression(6.74190124741094e-138);ncRNA metabolic process(0.0571200249137145);negative regulation of transcription from RNA polymerase II promoter(5.96926349567125e-28);oogenesis(0.00530367317660169);positive regulation of apoptotic process(2.1460463866238e-18);regulation of steroid biosynthetic process(0.00136470597123831);RNA metabolic process(1.…	gene expression
P25788	PSMA3	gene expression	6.7419e-138	anaphase-promoting complex-dependent proteasomal ubiquitin-dependent protein catabolic process(3.27380572874093e-80);antigen processing and presentation of exogenous peptide antigen via MHC class I(9.64465771579562e-64);antigen processing and presentation of exogenous peptide antigen via MHC class I, TAP-dependent(2.1101067617002e-64);antigen processing and presentation of peptide antigen via MHC…	gene expression
Q9UL46	PSME2	gene expression	6.7419e-138	anaphase-promoting complex-dependent proteasomal ubiquitin-dependent protein catabolic process(3.27380572874093e-80);antigen processing and presentation of exogenous peptide antigen via MHC class I(9.64465771579562e-64);antigen processing and presentation of exogenous peptide antigen via MHC class I, TAP-dependent(2.1101067617002e-64);antigen processing and presentation of peptide antigen via MHC…	gene expression
Q96LI5	CNOT6L	gene expression	6.7419e-138	gene expression(6.74190124741094e-138);gene silencing by RNA(8.04995619123631e-08);mRNA destabilization(0.0136025267425634);mRNA metabolic process(2.33930640299256e-88);nuclear-transcribed mRNA catabolic process, deadenylation-dependent decay(6.47984706390392e-14);nuclear-transcribed mRNA poly(A) tail shortening(3.94369002421323e-08);positive regulation of cell proliferation(1.6005548826857e-14);…	gene expression
Q99460	PSMD1	gene expression	6.7419e-138	anaphase-promoting complex-dependent proteasomal ubiquitin-dependent protein catabolic process(3.27380572874093e-80);antigen processing and presentation of exogenous peptide antigen via MHC class I(9.64465771579562e-64);antigen processing and presentation of exogenous peptide antigen via MHC class I, TAP-dependent(2.1101067617002e-64);antigen processing and presentation of peptide antigen via MHC…	gene expression
Q08211	DHX9	gene expression	6.7419e-138	ATP catabolic process(7.53610798013254e-16);cellular response to heat(0.000315776177784766);circadian rhythm(0.00684322387522923);CRD-mediated mRNA stabilization(7.48403373875046e-05);DNA duplex unwinding(0.00456590741592145);gene expression(6.74190124741094e-138);innate immune response(1.94352580596968e-36);mRNA splicing, via spliceosome(5.44717536491439e-43);osteoblast differentiation(6.7064805…	gene expression
P28074	PSMB5	gene expression	6.7419e-138	anaphase-promoting complex-dependent proteasomal ubiquitin-dependent protein catabolic process(3.27380572874093e-80);antigen processing and presentation of exogenous peptide antigen via MHC class I(9.64465771579562e-64);antigen processing and presentation of exogenous peptide antigen via MHC class I, TAP-dependent(2.1101067617002e-64);antigen processing and presentation of peptide antigen via MHC…	gene expression
Q15796	SMAD2	gene expression	6.7419e-138	activin receptor signaling pathway(0.000764583791201912);anterior/posterior pattern specification(0.00576268434102646);cell fate commitment(0.195457715833233);common-partner SMAD protein phosphorylation(0.0345977529480911);developmental growth(0.0139614628276711);embryonic cranial skeleton morphogenesis(0.0192553858485209);embryonic foregut morphogenesis(0.000213058312053623);endoderm formation(0…	gene expression
P08047	SP1	gene expression	6.7419e-138	cellular lipid metabolic process(0.0114908824820828);definitive hemopoiesis(0.0619712771827633);embryonic camera-type eye morphogenesis(0.113927824706033);embryonic placenta development(0.00118889826358331);embryonic process involved in female pregnancy(0.0546736716631625);embryonic skeletal system development(0.148054592514669);enucleate erythrocyte differentiation(0.0715095636734823);gene expre…	gene expression
P25787	PSMA2	gene expression	6.7419e-138	anaphase-promoting complex-dependent proteasomal ubiquitin-dependent protein catabolic process(3.27380572874093e-80);antigen processing and presentation of exogenous peptide antigen via MHC class I(9.64465771579562e-64);antigen processing and presentation of exogenous peptide antigen via MHC class I, TAP-dependent(2.1101067617002e-64);antigen processing and presentation of peptide antigen via MHC…	gene expression
P12757	SKIL	gene expression	6.7419e-138	blastocyst formation(0.0294363215677173);cell cycle arrest(1.7152206219654e-09);gene expression(6.74190124741094e-138);lens fiber cell differentiation(0.00196080398285964);lymphocyte homeostasis(0.0268339123440405);negative regulation of cell differentiation(0.000634134685189678);negative regulation of transcription from RNA polymerase II promoter(5.96926349567125e-28);negative regulation of tran…	gene expression
P28062	PSMB8	gene expression	6.7419e-138	anaphase-promoting complex-dependent proteasomal ubiquitin-dependent protein catabolic process(3.27380572874093e-80);antigen processing and presentation of exogenous peptide antigen via MHC class I(9.64465771579562e-64);antigen processing and presentation of exogenous peptide antigen via MHC class I, TAP-dependent(2.1101067617002e-64);antigen processing and presentation of peptide antigen via MHC…	gene expression
Q9UKV8	AGO2	gene expression	6.7419e-138	epidermal growth factor receptor signaling pathway(1.75986367233939e-26);Fc-epsilon receptor signaling pathway(6.53521825200287e-17);fibroblast growth factor receptor signaling pathway(2.13408916123923e-20);gene expression(6.74190124741094e-138);gene silencing by RNA(8.04995619123631e-08);innate immune response(1.94352580596968e-36);mRNA cleavage involved in gene silencing by miRNA(0.005486038216…	gene expression
Q13573	SNW1	gene expression	6.7419e-138	cellular response to retinoic acid(0.00242204328386331);gene expression(6.74190124741094e-138);intrinsic apoptotic signaling pathway in response to DNA damage by p53 class mediator(4.31544709376223e-05);mRNA splicing, via spliceosome(5.44717536491439e-43);negative regulation of transcription from RNA polymerase II promoter(5.96926349567125e-28);negative regulation of transcription, DNA-dependent(…	gene expression
P17252	PRKCA	gene expression	6.7419e-138	activation of adenylate cyclase activity(0.000198381385816691);activation of phospholipase C activity(3.23029001321683e-05);angiogenesis(0.000544790896675294);apoptotic signaling pathway(3.36273737543266e-12);blood coagulation(1.95256501598454e-26);cell adhesion(0.000430665088206722);cellular calcium ion homeostasis(0.0610237764586075);cellular response to carbohydrate stimulus(0.0242169609192454…	gene expression
Q8IU60	DCP2	gene expression	6.7419e-138	exonucleolytic nuclear-transcribed mRNA catabolic process involved in deadenylation-dependent decay(1.85792058305937e-10);gene expression(6.74190124741094e-138);histone mRNA catabolic process(2.43064457541219e-06);mRNA catabolic process(1.61709409112656e-05);mRNA metabolic process(2.33930640299256e-88);nuclear-transcribed mRNA catabolic process, deadenylation-dependent decay(6.47984706390392e-14)…	gene expression
P33240	CSTF2	gene expression	6.7419e-138	gene expression(6.74190124741094e-138);mRNA 3_-end processing(5.28792054269176e-15);mRNA cleavage(0.00123160566499979);mRNA polyadenylation(8.04995619123631e-08);mRNA splicing, via spliceosome(5.44717536491439e-43);RNA splicing(5.31405344997076e-48);termination of RNA polymerase II transcription(1.00823192195829e-14);transcription from RNA polymerase II promoter(3.31679247739598e-25)	gene expression
Q9UFF9	CNOT8	gene expression	6.7419e-138	exonucleolytic nuclear-transcribed mRNA catabolic process involved in deadenylation-dependent decay(1.85792058305937e-10);gene expression(6.74190124741094e-138);gene silencing by miRNA(0.000111953336075735);mRNA metabolic process(2.33930640299256e-88);negative regulation of cell proliferation(4.1199860439205e-14);nuclear-transcribed mRNA catabolic process, deadenylation-dependent decay(6.47984706…	gene expression
O95602	POLR1A	gene expression	6.7419e-138	gene expression(6.74190124741094e-138);termination of RNA polymerase I transcription(5.6694519614562e-07);transcription elongation from RNA polymerase I promoter(3.21948839417254e-07);transcription from RNA polymerase I promoter(6.24612897354984e-10);transcription initiation from RNA polymerase I promoter(9.28745817647372e-07)	gene expression
Q9H9G7	AGO3	gene expression	6.7419e-138	epidermal growth factor receptor signaling pathway(1.75986367233939e-26);Fc-epsilon receptor signaling pathway(6.53521825200287e-17);fibroblast growth factor receptor signaling pathway(2.13408916123923e-20);gene expression(6.74190124741094e-138);innate immune response(1.94352580596968e-36);mRNA catabolic process(1.61709409112656e-05);negative regulation of translation involved in gene silencing b…	gene expression
P09661	SNRPA1	gene expression	6.7419e-138	gene expression(6.74190124741094e-138);mRNA splicing, via spliceosome(5.44717536491439e-43);RNA splicing(5.31405344997076e-48)	gene expression
P51665	PSMD7	gene expression	6.7419e-138	anaphase-promoting complex-dependent proteasomal ubiquitin-dependent protein catabolic process(3.27380572874093e-80);antigen processing and presentation of exogenous peptide antigen via MHC class I(9.64465771579562e-64);antigen processing and presentation of exogenous peptide antigen via MHC class I, TAP-dependent(2.1101067617002e-64);antigen processing and presentation of peptide antigen via MHC…	gene expression
P43686	PSMC4	gene expression	6.7419e-138	anaphase-promoting complex-dependent proteasomal ubiquitin-dependent protein catabolic process(3.27380572874093e-80);antigen processing and presentation of exogenous peptide antigen via MHC class I(9.64465771579562e-64);antigen processing and presentation of exogenous peptide antigen via MHC class I, TAP-dependent(2.1101067617002e-64);antigen processing and presentation of peptide antigen via MHC…	gene expression
P24928	POLR2A	gene expression	6.7419e-138	7-methylguanosine mRNA capping(2.71111722906627e-06);DNA repair(7.17980175390962e-15);gene expression(6.74190124741094e-138);mRNA splicing, via spliceosome(5.44717536491439e-43);nucleotide-excision repair(3.14593488271296e-11);positive regulation of viral transcription(6.85860930018945e-06);regulation of transcription, DNA-dependent(1.22901328835568e-09);RNA splicing(5.31405344997076e-48);transcr…	gene expression
P01106	MYC	gene expression	6.7419e-138	branching involved in ureteric bud morphogenesis(0.0261111906681309);canonical Wnt receptor signaling pathway(4.34263217195152e-06);cell cycle arrest(1.7152206219654e-09);cellular iron ion homeostasis(0.0526402325613507);response to DNA damage stimulus(4.75418310877754e-13);cellular response to drug(0.0017394527511977);cellular response to UV(6.9002151427879e-05);chromatin remodeling(4.1510792043…	gene expression
Q99436	PSMB7	gene expression	6.7419e-138	anaphase-promoting complex-dependent proteasomal ubiquitin-dependent protein catabolic process(3.27380572874093e-80);antigen processing and presentation of exogenous peptide antigen via MHC class I(9.64465771579562e-64);antigen processing and presentation of exogenous peptide antigen via MHC class I, TAP-dependent(2.1101067617002e-64);antigen processing and presentation of peptide antigen via MHC…	gene expression
P62191	PSMC1	gene expression	6.7419e-138	anaphase-promoting complex-dependent proteasomal ubiquitin-dependent protein catabolic process(3.27380572874093e-80);antigen processing and presentation of exogenous peptide antigen via MHC class I(9.64465771579562e-64);antigen processing and presentation of exogenous peptide antigen via MHC class I, TAP-dependent(2.1101067617002e-64);antigen processing and presentation of peptide antigen via MHC…	gene expression
Q8IYB3	SRRM1	gene expression	6.7419e-138	gene expression(6.74190124741094e-138);mRNA 3_-end processing(5.28792054269176e-15);mRNA export from nucleus(7.8491808330921e-16);mRNA splicing, via spliceosome(5.44717536491439e-43);RNA splicing(5.31405344997076e-48);RNA splicing, via transesterification reactions(0.00212547613683093);termination of RNA polymerase II transcription(1.00823192195829e-14);transcription from RNA polymerase II promot…	gene expression
P28070	PSMB4	gene expression	6.7419e-138	anaphase-promoting complex-dependent proteasomal ubiquitin-dependent protein catabolic process(3.27380572874093e-80);antigen processing and presentation of exogenous peptide antigen via MHC class I(9.64465771579562e-64);antigen processing and presentation of exogenous peptide antigen via MHC class I, TAP-dependent(2.1101067617002e-64);antigen processing and presentation of peptide antigen via MHC…	gene expression
P26368	U2AF2	gene expression	6.7419e-138	gene expression(6.74190124741094e-138);mRNA 3_-end processing(5.28792054269176e-15);mRNA export from nucleus(7.8491808330921e-16);mRNA processing(1.72921648580983e-19);mRNA splicing, via spliceosome(5.44717536491439e-43);negative regulation of mRNA splicing, via spliceosome(7.46376593207252e-08);RNA splicing(5.31405344997076e-48);termination of RNA polymerase II transcription(1.00823192195829e-14…	gene expression
P49721	PSMB2	gene expression	6.7419e-138	anaphase-promoting complex-dependent proteasomal ubiquitin-dependent protein catabolic process(3.27380572874093e-80);antigen processing and presentation of exogenous peptide antigen via MHC class I(9.64465771579562e-64);antigen processing and presentation of exogenous peptide antigen via MHC class I, TAP-dependent(2.1101067617002e-64);antigen processing and presentation of peptide antigen via MHC…	gene expression
P25789	PSMA4	gene expression	6.7419e-138	anaphase-promoting complex-dependent proteasomal ubiquitin-dependent protein catabolic process(3.27380572874093e-80);antigen processing and presentation of exogenous peptide antigen via MHC class I(9.64465771579562e-64);antigen processing and presentation of exogenous peptide antigen via MHC class I, TAP-dependent(2.1101067617002e-64);antigen processing and presentation of peptide antigen via MHC…	gene expression
O00232	PSMD12	gene expression	6.7419e-138	anaphase-promoting complex-dependent proteasomal ubiquitin-dependent protein catabolic process(3.27380572874093e-80);antigen processing and presentation of exogenous peptide antigen via MHC class I(9.64465771579562e-64);antigen processing and presentation of exogenous peptide antigen via MHC class I, TAP-dependent(2.1101067617002e-64);antigen processing and presentation of peptide antigen via MHC…	gene expression
P60228	EIF3E	gene expression	6.7419e-138	cellular protein metabolic process(7.74482560391506e-08);formation of translation preinitiation complex(0.124327697753243);gene expression(6.74190124741094e-138);negative regulation of translational initiation(1.35126634195994e-05);nuclear-transcribed mRNA catabolic process, nonsense-mediated decay(1.06326505616622e-06);regulation of translational initiation(0.170110695365613);translation(0.01384…	gene expression
P28066	PSMA5	gene expression	6.7419e-138	anaphase-promoting complex-dependent proteasomal ubiquitin-dependent protein catabolic process(3.27380572874093e-80);antigen processing and presentation of exogenous peptide antigen via MHC class I(9.64465771579562e-64);antigen processing and presentation of exogenous peptide antigen via MHC class I, TAP-dependent(2.1101067617002e-64);antigen processing and presentation of peptide antigen via MHC…	gene expression
Q9UNM6	PSMD13	gene expression	6.7419e-138	anaphase-promoting complex-dependent proteasomal ubiquitin-dependent protein catabolic process(3.27380572874093e-80);antigen processing and presentation of exogenous peptide antigen via MHC class I(9.64465771579562e-64);antigen processing and presentation of exogenous peptide antigen via MHC class I, TAP-dependent(2.1101067617002e-64);antigen processing and presentation of peptide antigen via MHC…	gene expression
O00231	PSMD11	gene expression	6.7419e-138	anaphase-promoting complex-dependent proteasomal ubiquitin-dependent protein catabolic process(3.27380572874093e-80);antigen processing and presentation of exogenous peptide antigen via MHC class I(9.64465771579562e-64);antigen processing and presentation of exogenous peptide antigen via MHC class I, TAP-dependent(2.1101067617002e-64);antigen processing and presentation of peptide antigen via MHC…	gene expression
P63104	YWHAZ	gene expression	6.7419e-138	apoptotic process(1.60956479031183e-71);blood coagulation(1.95256501598454e-26);gene expression(6.74190124741094e-138);histamine secretion by mast cell(0.0497392230538323);intrinsic apoptotic signaling pathway(3.99605787326589e-15);membrane organization(1.23617602505467e-22);mRNA metabolic process(2.33930640299256e-88);negative regulation of apoptotic process(7.25354615620933e-67);platelet activa…	gene expression
Q15717	ELAVL1	gene expression	6.7419e-138	3_-UTR-mediated mRNA stabilization(2.72886322460709e-08);gene expression(6.74190124741094e-138);mRNA metabolic process(2.33930640299256e-88);mRNA stabilization(0.039701731951948);multicellular organismal development(0.180636142791529);positive regulation of translation(0.000979897334228561);regulation of stem cell maintenance(0.0522134236386405);RNA metabolic process(1.53330226583338e-87)	gene expression
Q15428	SF3A2	gene expression	6.7419e-138	gene expression(6.74190124741094e-138);mRNA 3_-splice site recognition(2.05340378689275e-07);mRNA processing(1.72921648580983e-19);mRNA splicing, via spliceosome(5.44717536491439e-43);RNA splicing(5.31405344997076e-48)	gene expression
P03372	ESR1	gene expression	6.7419e-138	androgen metabolic process(0.103216331924549);antral ovarian follicle growth(0.0422323248909385);cellular response to estradiol stimulus(0.00303999947332981);chromatin remodeling(4.15107920435725e-08);epithelial cell development(0.0546736716631625);epithelial cell proliferation involved in mammary gland duct elongation(0.0422323248909385);gene expression(6.74190124741094e-138);intracellular estro…	gene expression
Q5RKV6	EXOSC6	gene expression	6.7419e-138	DNA deamination(4.50274066597163e-05);exonucleolytic nuclear-transcribed mRNA catabolic process involved in deadenylation-dependent decay(1.85792058305937e-10);gene expression(6.74190124741094e-138);isotype switching(0.103216331924549);mRNA metabolic process(2.33930640299256e-88);nuclear-transcribed mRNA catabolic process, deadenylation-dependent decay(6.47984706390392e-14);RNA metabolic process(…	gene expression
P62333	PSMC6	gene expression	6.7419e-138	anaphase-promoting complex-dependent proteasomal ubiquitin-dependent protein catabolic process(3.27380572874093e-80);antigen processing and presentation of exogenous peptide antigen via MHC class I(9.64465771579562e-64);antigen processing and presentation of exogenous peptide antigen via MHC class I, TAP-dependent(2.1101067617002e-64);antigen processing and presentation of peptide antigen via MHC…	gene expression
P67809	YBX1	gene expression	6.7419e-138	CRD-mediated mRNA stabilization(7.48403373875046e-05);gene expression(6.74190124741094e-138);in utero embryonic development(3.89958211142535e-08);mRNA splicing, via spliceosome(5.44717536491439e-43);negative regulation of striated muscle cell differentiation(0.0285533238460276);negative regulation of transcription from RNA polymerase II promoter(5.96926349567125e-28);positive regulation of cell d…	gene expression
P35998	PSMC2	gene expression	6.7419e-138	anaphase-promoting complex-dependent proteasomal ubiquitin-dependent protein catabolic process(3.27380572874093e-80);antigen processing and presentation of exogenous peptide antigen via MHC class I(9.64465771579562e-64);antigen processing and presentation of exogenous peptide antigen via MHC class I, TAP-dependent(2.1101067617002e-64);antigen processing and presentation of peptide antigen via MHC…	gene expression
P84022	SMAD3	gene expression	6.7419e-138	activation of cysteine-type endopeptidase activity involved in apoptotic process(0.00025205808538854);activation of cysteine-type endopeptidase activity involved in apoptotic signaling pathway(0.0345977529480911);activin receptor signaling pathway(0.000764583791201912);cell cycle arrest(1.7152206219654e-09);cell-cell junction organization(0.0151247366567254);developmental growth(0.013961462827671…	gene expression
Q05519	SRSF11	gene expression	6.7419e-138	gene expression(6.74190124741094e-138);mRNA 3_-end processing(5.28792054269176e-15);mRNA export from nucleus(7.8491808330921e-16);mRNA processing(1.72921648580983e-19);mRNA splicing, via spliceosome(5.44717536491439e-43);RNA splicing(5.31405344997076e-48);termination of RNA polymerase II transcription(1.00823192195829e-14);transcription from RNA polymerase II promoter(3.31679247739598e-25)	gene expression
Q9UBU9	NXF1	gene expression	6.7419e-138	gene expression(6.74190124741094e-138);mRNA export from nucleus(7.8491808330921e-16);poly(A)+ mRNA export from nucleus(0.0371568943273117);viral process(1.29423059754579e-116)	gene expression
P61978	HNRNPK	gene expression	6.7419e-138	gene expression(6.74190124741094e-138);mRNA splicing, via spliceosome(5.44717536491439e-43);positive regulation of low-density lipoprotein particle receptor biosynthetic process(0.0109119575290057);positive regulation of receptor-mediated endocytosis(0.000871418933545523);positive regulation of transcription from RNA polymerase II promoter(1.91663488758372e-22);regulation of lipid transport by po…	gene expression
P60900	PSMA6	gene expression	6.7419e-138	anaphase-promoting complex-dependent proteasomal ubiquitin-dependent protein catabolic process(3.27380572874093e-80);antigen processing and presentation of exogenous peptide antigen via MHC class I(9.64465771579562e-64);antigen processing and presentation of exogenous peptide antigen via MHC class I, TAP-dependent(2.1101067617002e-64);antigen processing and presentation of peptide antigen via MHC…	gene expression
Q00403	GTF2B	gene expression	6.7419e-138	gene expression(6.74190124741094e-138);regulation of transcription, DNA-dependent(1.22901328835568e-09);transcription elongation from RNA polymerase II promoter(2.49124392756898e-06);transcription from RNA polymerase II promoter(3.31679247739598e-25);transcription initiation from RNA polymerase II promoter(3.42094464534599e-15);viral process(1.29423059754579e-116)	gene expression
Q9UPQ9	TNRC6B	gene expression	6.7419e-138	epidermal growth factor receptor signaling pathway(1.75986367233939e-26);Fc-epsilon receptor signaling pathway(6.53521825200287e-17);fibroblast growth factor receptor signaling pathway(2.13408916123923e-20);gene expression(6.74190124741094e-138);gene silencing by RNA(8.04995619123631e-08);innate immune response(1.94352580596968e-36);neurotrophin TRK receptor signaling pathway(5.41361763517048e-33…	gene expression
P35269	GTF2F1	gene expression	6.7419e-138	7-methylguanosine mRNA capping(2.71111722906627e-06);gene expression(6.74190124741094e-138);mRNA splicing, via spliceosome(5.44717536491439e-43);positive regulation of catalytic activity(4.20671221345357e-08);positive regulation of transcription from RNA polymerase II promoter(1.91663488758372e-22);positive regulation of viral transcription(6.85860930018945e-06);response to virus(0.00064416268749…	gene expression
P63151	PPP2R2A	gene expression	6.7419e-138	G2/M transition of mitotic cell cycle(1.84493168112259e-17);gene expression(6.74190124741094e-138);mitotic cell cycle(1.03786257064852e-97);mitotic nuclear envelope reassembly(0.000332199048044635);mRNA metabolic process(2.33930640299256e-88);nuclear-transcribed mRNA catabolic process, nonsense-mediated decay(1.06326505616622e-06);protein dephosphorylation(0.31161458574415);regulation of catalyti…	gene expression
Q86V81	ALYREF	gene expression	6.7419e-138	gene expression(6.74190124741094e-138);mRNA 3_-end processing(5.28792054269176e-15);mRNA export from nucleus(7.8491808330921e-16);mRNA splicing, via spliceosome(5.44717536491439e-43);osteoblast differentiation(6.70648050014457e-05);positive regulation of DNA-dependent transcription, elongation(0.0320242485290104);regulation of DNA recombination(0.0162782507566458);replication fork processing(0.03…	gene expression
O00487	PSMD14	gene expression	6.7419e-138	anaphase-promoting complex-dependent proteasomal ubiquitin-dependent protein catabolic process(3.27380572874093e-80);antigen processing and presentation of exogenous peptide antigen via MHC class I(9.64465771579562e-64);antigen processing and presentation of exogenous peptide antigen via MHC class I, TAP-dependent(2.1101067617002e-64);antigen processing and presentation of peptide antigen via MHC…	gene expression
O43809	NUDT21	gene expression	6.7419e-138	gene expression(6.74190124741094e-138);mRNA 3_-end processing(5.28792054269176e-15);mRNA polyadenylation(8.04995619123631e-08);mRNA processing(1.72921648580983e-19);mRNA splicing, via spliceosome(5.44717536491439e-43);protein tetramerization(0.00936391362752461);RNA splicing(5.31405344997076e-48);termination of RNA polymerase II transcription(1.00823192195829e-14);transcription from RNA polymeras…	gene expression
Q16629	SRSF7	gene expression	6.7419e-138	gene expression(6.74190124741094e-138);mRNA 3_-end processing(5.28792054269176e-15);mRNA export from nucleus(7.8491808330921e-16);mRNA processing(1.72921648580983e-19);mRNA splicing, via spliceosome(5.44717536491439e-43);negative regulation of mRNA splicing, via spliceosome(7.46376593207252e-08);RNA splicing(5.31405344997076e-48);termination of RNA polymerase II transcription(1.00823192195829e-14…	gene expression
O75643	SNRNP200	gene expression	6.7419e-138	ATP catabolic process(7.53610798013254e-16);cis assembly of pre-catalytic spliceosome(0.00548603821606595);gene expression(6.74190124741094e-138);mRNA splicing, via spliceosome(5.44717536491439e-43);osteoblast differentiation(6.70648050014457e-05);RNA splicing(5.31405344997076e-48)	gene expression
O43242	PSMD3	gene expression	6.7419e-138	anaphase-promoting complex-dependent proteasomal ubiquitin-dependent protein catabolic process(3.27380572874093e-80);antigen processing and presentation of exogenous peptide antigen via MHC class I(9.64465771579562e-64);antigen processing and presentation of exogenous peptide antigen via MHC class I, TAP-dependent(2.1101067617002e-64);antigen processing and presentation of peptide antigen via MHC…	gene expression
P52434	POLR2H	gene expression	6.7419e-138	7-methylguanosine mRNA capping(2.71111722906627e-06);DNA repair(7.17980175390962e-15);gene expression(6.74190124741094e-138);innate immune response(1.94352580596968e-36);mRNA splicing, via spliceosome(5.44717536491439e-43);nucleotide-excision repair(3.14593488271296e-11);positive regulation of type I interferon production(1.15491687961065e-14);positive regulation of viral transcription(6.85860930…	gene expression
Q8TAA3	PSMA8	gene expression	6.7419e-138	anaphase-promoting complex-dependent proteasomal ubiquitin-dependent protein catabolic process(3.27380572874093e-80);antigen processing and presentation of exogenous peptide antigen via MHC class I(9.64465771579562e-64);antigen processing and presentation of exogenous peptide antigen via MHC class I, TAP-dependent(2.1101067617002e-64);antigen processing and presentation of peptide antigen via MHC…	gene expression
P48556	PSMD8	gene expression	6.7419e-138	anaphase-promoting complex-dependent proteasomal ubiquitin-dependent protein catabolic process(3.27380572874093e-80);antigen processing and presentation of exogenous peptide antigen via MHC class I(9.64465771579562e-64);antigen processing and presentation of exogenous peptide antigen via MHC class I, TAP-dependent(2.1101067617002e-64);antigen processing and presentation of peptide antigen via MHC…	gene expression
O14818	PSMA7	gene expression	6.7419e-138	anaphase-promoting complex-dependent proteasomal ubiquitin-dependent protein catabolic process(3.27380572874093e-80);antigen processing and presentation of exogenous peptide antigen via MHC class I(9.64465771579562e-64);antigen processing and presentation of exogenous peptide antigen via MHC class I, TAP-dependent(2.1101067617002e-64);antigen processing and presentation of peptide antigen via MHC…	gene expression
P19388	POLR2E	gene expression	6.7419e-138	7-methylguanosine mRNA capping(2.71111722906627e-06);DNA repair(7.17980175390962e-15);gene expression(6.74190124741094e-138);innate immune response(1.94352580596968e-36);mRNA splicing, via spliceosome(5.44717536491439e-43);nucleotide-excision repair(3.14593488271296e-11);positive regulation of type I interferon production(1.15491687961065e-14);positive regulation of viral transcription(6.85860930…	gene expression
Q15459	SF3A1	gene expression	6.7419e-138	gene expression(6.74190124741094e-138);mRNA 3_-splice site recognition(2.05340378689275e-07);mRNA processing(1.72921648580983e-19);mRNA splicing, via spliceosome(5.44717536491439e-43);RNA splicing(5.31405344997076e-48)	gene expression
P28072	PSMB6	gene expression	6.7419e-138	anaphase-promoting complex-dependent proteasomal ubiquitin-dependent protein catabolic process(3.27380572874093e-80);antigen processing and presentation of exogenous peptide antigen via MHC class I(9.64465771579562e-64);antigen processing and presentation of exogenous peptide antigen via MHC class I, TAP-dependent(2.1101067617002e-64);antigen processing and presentation of peptide antigen via MHC…	gene expression
Q10570	CPSF1	gene expression	6.7419e-138	gene expression(6.74190124741094e-138);mRNA 3_-end processing(5.28792054269176e-15);mRNA cleavage(0.00123160566499979);mRNA export from nucleus(7.8491808330921e-16);mRNA polyadenylation(8.04995619123631e-08);mRNA splicing, via spliceosome(5.44717536491439e-43);RNA splicing(5.31405344997076e-48);termination of RNA polymerase II transcription(1.00823192195829e-14);transcription from RNA polymerase …	gene expression
Q9Y2S0	POLR1D	gene expression	6.7419e-138	gene expression(6.74190124741094e-138);innate immune response(1.94352580596968e-36);positive regulation of type I interferon production(1.15491687961065e-14);termination of RNA polymerase I transcription(5.6694519614562e-07);termination of RNA polymerase III transcription(1.26832010987357e-09);transcription elongation from RNA polymerase I promoter(3.21948839417254e-07);transcription elongation f…	gene expression
P68104	EEF1A1	gene expression	6.7419e-138	cellular protein metabolic process(7.74482560391506e-08);cellular response to epidermal growth factor stimulus(4.21263755180794e-06);gene expression(6.74190124741094e-138);regulation of transcription, DNA-dependent(1.22901328835568e-09);transcription, DNA-dependent(9.84755462157454e-28);translation(0.0138480569479162);translational elongation(0.217013197259266)	gene expression
P17980	PSMC3	gene expression	6.7419e-138	anaphase-promoting complex-dependent proteasomal ubiquitin-dependent protein catabolic process(3.27380572874093e-80);antigen processing and presentation of exogenous peptide antigen via MHC class I(9.64465771579562e-64);antigen processing and presentation of exogenous peptide antigen via MHC class I, TAP-dependent(2.1101067617002e-64);antigen processing and presentation of peptide antigen via MHC…	gene expression
Q15287	RNPS1	gene expression	6.7419e-138	gene expression(6.74190124741094e-138);mRNA 3_-end processing(5.28792054269176e-15);mRNA export from nucleus(7.8491808330921e-16);mRNA metabolic process(2.33930640299256e-88);mRNA splicing, via spliceosome(5.44717536491439e-43);negative regulation of mRNA splicing, via spliceosome(7.46376593207252e-08);nuclear-transcribed mRNA catabolic process, nonsense-mediated decay(1.06326505616622e-06);posit…	gene expression
Q13200	PSMD2	gene expression	6.7419e-138	anaphase-promoting complex-dependent proteasomal ubiquitin-dependent protein catabolic process(3.27380572874093e-80);antigen processing and presentation of exogenous peptide antigen via MHC class I(9.64465771579562e-64);antigen processing and presentation of exogenous peptide antigen via MHC class I, TAP-dependent(2.1101067617002e-64);antigen processing and presentation of peptide antigen via MHC…	gene expression
Q96EB6	SIRT1	viral process	1.29423e-116	angiogenesis(0.000544790896675294);cell aging(0.000104495333951889);cellular glucose homeostasis(0.0422323248909385);response to DNA damage stimulus(4.75418310877754e-13);cellular response to hydrogen peroxide(4.04689481716796e-06);cellular response to hypoxia(9.9709061322379e-08);cellular response to ionizing radiation(3.8513428161865e-08);cellular response to starvation(0.00692278474585431);cel…
Q9Y6G9	DYNC1LI1	viral process	1.29423e-116	microtubule-based movement(0.00258019997060106);mitosis(2.87144545142622e-13);positive regulation of mitotic cell cycle spindle assembly checkpoint(0.000111953336075735);transport(0.00464941054385742);viral process(1.29423059754579e-116)
Q13137	CALCOCO2	viral process	1.29423e-116	response to interferon-gamma(0.00433095472916173);viral process(1.29423059754579e-116)
Q07021	C1QBP	viral process	1.29423e-116	apoptotic process(1.60956479031183e-71);blood coagulation(1.95256501598454e-26);blood coagulation, intrinsic pathway(0.0643762907206426);complement activation, classical pathway(0.30926183453007);immune response(4.79425365633182e-21);innate immune response(1.94352580596968e-36);mature ribosome assembly(0.0242169609192454);mRNA processing(1.72921648580983e-19);negative regulation of defense respon…
P19174	PLCG1	viral process	1.29423e-116	activation of MAPKK activity(1.91344197194e-11);activation of phospholipase C activity(3.23029001321683e-05);axon guidance(5.08132805034548e-13);blood coagulation(1.95256501598454e-26);calcium-mediated signaling(0.0192553858485209);cell migration(5.24949754846966e-09);cellular response to epidermal growth factor stimulus(4.21263755180794e-06);cytokine-mediated signaling pathway(8.0809712756812e-1…
P05556	ITGB1	viral process	1.29423e-116	axon guidance(5.08132805034548e-13);B cell differentiation(6.7250061992404e-07);blood coagulation(1.95256501598454e-26);calcium-independent cell-matrix adhesion(0.000207837482733159);cardiac muscle cell differentiation(0.101036059105008);cell fate specification(0.000575940782500363);cell junction assembly(5.64315632785475e-05);cell migration(5.24949754846966e-09);cell migration involved in sprout…
P06241	FYN	viral process	1.29423e-116	activated T cell proliferation(0.0715095636734823);axon guidance(5.08132805034548e-13);blood coagulation(1.95256501598454e-26);calcium ion transport(0.0604168192156532);cellular response to peptide hormone stimulus(0.000335452034964557);dendrite morphogenesis(0.180538351599893);detection of mechanical stimulus involved in sensory perception of pain(0.0761975040404053);epidermal growth factor rece…
Q9C035	TRIM5	viral process	1.29423e-116	activation of innate immune response(0.044748731997622);defense response to virus(0.000553563081713337);innate immune response(1.94352580596968e-36);negative regulation of viral entry into host cell(0.0294363215677173);negative regulation of viral release from host cell(0.0320242485290104);pattern recognition receptor signaling pathway(0.0215854071352867);positive regulation of I-kappaB kinase/NF…
P49790	NUP153	viral process	1.29423e-116	carbohydrate metabolic process(1.41437070139196e-05);cytokine-mediated signaling pathway(8.0809712756812e-14);glucose transport(4.99861860751136e-08);hexose transport(1.98069022062885e-09);mitotic cell cycle(1.03786257064852e-97);mitotic nuclear envelope disassembly(9.4556629078474e-16);mRNA transport(8.14144975279126e-08);negative regulation of RNA export from nucleus(7.54580457702938e-06);nucle…
Q92621	NUP205	viral process	1.29423e-116	carbohydrate metabolic process(1.41437070139196e-05);cytokine-mediated signaling pathway(8.0809712756812e-14);glucose transport(4.99861860751136e-08);hexose transport(1.98069022062885e-09);mitotic cell cycle(1.03786257064852e-97);mitotic nuclear envelope disassembly(9.4556629078474e-16);mRNA transport(8.14144975279126e-08);nuclear pore complex assembly(7.14774038665825e-07);nucleocytoplasmic tran…
P21796	VDAC1	viral process	1.29423e-116	anion transport(0.0345977529480911);apoptotic process(1.60956479031183e-71);behavioral fear response(0.0143451605018109);epithelial cell differentiation(0.0295502708177948);learning(0.00222233765437013);neuron-neuron synaptic transmission(0.0371568943273117);viral process(1.29423059754579e-116)
P04637	TP53	viral process	1.29423e-116	apoptotic process(1.60956479031183e-71);B cell lineage commitment(0.089941881204014);base-excision repair(0.000134434648774011);blood coagulation(1.95256501598454e-26);cell aging(0.000104495333951889);cell cycle arrest(1.7152206219654e-09);cell differentiation(2.77793779890238e-05);cell proliferation(1.66117760276388e-05);cellular protein localization(0.0610237764586075);response to DNA damage st…
O75694	NUP155	viral process	1.29423e-116	regulation of atrial cardiac muscle cell action potential(0.0320242485290104);carbohydrate metabolic process(1.41437070139196e-05);cytokine-mediated signaling pathway(8.0809712756812e-14);glucose transport(4.99861860751136e-08);hexose transport(1.98069022062885e-09);mitotic cell cycle(1.03786257064852e-97);mitotic nuclear envelope disassembly(9.4556629078474e-16);mRNA export from nucleus(7.849180…
Q99683	MAP3K5	viral process	1.29423e-116	activation of cysteine-type endopeptidase activity involved in apoptotic process(0.00025205808538854);activation of JUN kinase activity(0.0075035875014012);activation of MAPKK activity(1.91344197194e-11);apoptotic signaling pathway(3.36273737543266e-12);cellular response to hydrogen peroxide(4.04689481716796e-06);innate immune response(1.94352580596968e-36);intrinsic apoptotic signaling pathway i…
P12270	TPR	viral process	1.29423e-116	carbohydrate metabolic process(1.41437070139196e-05);cellular response to heat(0.000315776177784766);cellular response to interferon-alpha(0.000984905592001006);cytokine-mediated signaling pathway(8.0809712756812e-14);glucose transport(4.99861860751136e-08);hexose transport(1.98069022062885e-09);MAPK import into nucleus(0.000111953336075735);mitotic cell cycle(1.03786257064852e-97);mitosis(2.8714…
O43463	SUV39H1	viral process	1.29423e-116	cell cycle(7.03739232831182e-08);cell differentiation(2.77793779890238e-05);chromatin organization(2.79794872320029e-05);chromatin silencing at rDNA(9.0911170138229e-06);histone H3-K9 dimethylation(0.0136025267425634);histone H3-K9 trimethylation(0.0162782507566458);negative regulation of circadian rhythm(0.0215854071352867);negative regulation of transcription, DNA-dependent(4.71197011663288e-21…
Q96CW1	AP2M1	viral process	1.29423e-116	antigen processing and presentation of exogenous peptide antigen via MHC class II(1.41073868646436e-05);axon guidance(5.08132805034548e-13);endocytosis(1.40261929899212e-09);epidermal growth factor receptor signaling pathway(1.75986367233939e-26);intracellular protein transport(0.0429159115730439);membrane organization(1.23617602505467e-22);negative regulation of epidermal growth factor receptor …
Q13617	CUL2	viral process	1.29423e-116	cell cycle arrest(1.7152206219654e-09);cellular response to hypoxia(9.9709061322379e-08);G1/S transition of mitotic cell cycle(1.44739329752639e-76);intrinsic apoptotic signaling pathway(3.99605787326589e-15);negative regulation of cell proliferation(4.1199860439205e-14);protein ubiquitination(1.8050738961922e-14);regulation of transcription from RNA polymerase II promoter in response to hypoxia(…
O00410	IPO5	viral process	1.29423e-116	cellular response to amino acid stimulus(0.0196888137863819);negative regulation of catalytic activity(1.16106775068415e-06);NLS-bearing substrate import into nucleus(0.0667676385247506);positive regulation of protein import into nucleus(1.43846056942154e-06);ribosomal protein import into nucleus(0.0268339123440405);viral process(1.29423059754579e-116)
P62993	GRB2	viral process	1.29423e-116	aging(0.00347945185390858);anatomical structure formation involved in morphogenesis(0.0320242485290104);axon guidance(5.08132805034548e-13);blood coagulation(1.95256501598454e-26);branching involved in labyrinthine layer morphogenesis(0.0497392230538323);cell-cell signaling(0.000105528979094638);cellular response to ionizing radiation(3.8513428161865e-08);epidermal growth factor receptor signalin…
P12931	SRC	viral process	1.29423e-116	axon guidance(5.08132805034548e-13);blood coagulation(1.95256501598454e-26);bone resorption(3.86239191075843e-07);branching involved in mammary gland duct morphogenesis(0.124327697753243);cell adhesion(0.000430665088206722);cell cycle(7.03739232831182e-08);cellular response to progesterone stimulus(0.00548603821606595);epidermal growth factor receptor signaling pathway(1.75986367233939e-26);Fc-ga…
P78406	RAE1	viral process	1.29423e-116	carbohydrate metabolic process(1.41437070139196e-05);cellular response to organic cyclic compound(0.000100017934699045);cytokine-mediated signaling pathway(8.0809712756812e-14);glucose transport(4.99861860751136e-08);hexose transport(1.98069022062885e-09);mitotic cell cycle(1.03786257064852e-97);mitotic nuclear envelope disassembly(9.4556629078474e-16);mRNA export from nucleus(7.8491808330921e-16…
Q12986	NFX1	viral process	1.29423e-116	inflammatory response(0.00397962465528234);negative regulation of MHC class II biosynthetic process(0.000111953336075735);negative regulation of transcription from RNA polymerase II promoter(5.96926349567125e-28);transcription from RNA polymerase II promoter(3.31679247739598e-25);viral process(1.29423059754579e-116)
P30480	HLA-B	viral process	1.29423e-116	antigen processing and presentation of exogenous peptide antigen via MHC class I(9.64465771579562e-64);antigen processing and presentation of exogenous peptide antigen via MHC class I, TAP-dependent(2.1101067617002e-64);antigen processing and presentation of exogenous peptide antigen via MHC class I, TAP-independent(0.168334446479182);antigen processing and presentation of peptide antigen via MHC…
P63279	UBE2I	viral process	1.29423e-116	cellular protein metabolic process(7.74482560391506e-08);cellular protein modification process(0.013209084409749);chromosome segregation(0.00215805169191897);mitosis(2.87144545142622e-13);negative regulation of transcription from RNA polymerase II promoter(5.96926349567125e-28);negative regulation of transcription, DNA-dependent(4.71197011663288e-21);positive regulation of intracellular steroid h…
P28482	MAPK1	viral process	1.29423e-116	activation of MAPK activity(4.09889172460732e-08);activation of MAPKK activity(1.91344197194e-11);apoptotic process(1.60956479031183e-71);axon guidance(5.08132805034548e-13);B cell receptor signaling pathway(0.132427597526889);blood coagulation(1.95256501598454e-26);caveolin-mediated endocytosis(0.0162782507566458);cell cycle(7.03739232831182e-08);response to DNA damage stimulus(4.75418310877754e…
Q00987	MDM2	viral process	1.29423e-116	cellular response to acid(0.0715095636734823);cellular response to alkaloid(0.0497392230538323);cellular response to antibiotic(0.0691453773324563);cellular response to estrogen stimulus(0.0643762907206426);cellular response to hydrogen peroxide(4.04689481716796e-06);cellular response to hypoxia(9.9709061322379e-08);cellular response to peptide hormone stimulus(0.000335452034964557);cellular resp…
P49792	RANBP2	viral process	1.29423e-116	carbohydrate metabolic process(1.41437070139196e-05);cytokine-mediated signaling pathway(8.0809712756812e-14);glucose transport(4.99861860751136e-08);hexose transport(1.98069022062885e-09);mitotic cell cycle(1.03786257064852e-97);mitotic nuclear envelope disassembly(9.4556629078474e-16);mRNA transport(8.14144975279126e-08);negative regulation of glucokinase activity(0.000207837482733159);protein …
Q93034	CUL5	viral process	1.29423e-116	calcium ion transmembrane transport(0.0139614628276711);cell cycle arrest(1.7152206219654e-09);cell proliferation(1.66117760276388e-05);cytosolic calcium ion homeostasis(0.00365971810313465);G1/S transition of mitotic cell cycle(1.44739329752639e-76);intrinsic apoptotic signaling pathway(3.99605787326589e-15);negative regulation of cell proliferation(4.1199860439205e-14);protein ubiquitination(1.…
Q05086	UBE3A	viral process	1.29423e-116	androgen receptor signaling pathway(8.93821162758304e-06);brain development(0.0552809632605685);ovarian follicle development(0.208015472637865);positive regulation of phosphatidylinositol 3-kinase cascade(0.0192553858485209);positive regulation of transcription from RNA polymerase II promoter(1.91663488758372e-22);prostate gland growth(0.0619712771827633);protein autoubiquitination(4.656770416672…
P49715	CEBPA	viral process	1.29423e-116	acute-phase response(0.000335452034964557);brown fat cell differentiation(0.0143451605018109);cell maturation(0.020566257122334);cellular response to lithium ion(0.10538387578232);cellular response to organic cyclic compound(0.000100017934699045);cholesterol metabolic process(0.0373612155763603);cytokine-mediated signaling pathway(8.0809712756812e-14);embryonic placenta development(0.001188898263…
Q14457	BECN1	viral process	1.29423e-116	autophagic vacuole assembly(1.92184497349828e-11);beta-amyloid metabolic process(0.00165012670078572);cellular defense response(0.000634134685189678);cellular response to aluminum ion(0.00820648185008414);cellular response to epidermal growth factor stimulus(4.21263755180794e-06);cytokinesis(4.89086023194942e-09);defense response to virus(0.000553563081713337);lysosome organization(0.000445484085…
P19320	VCAM1	viral process	1.29423e-116	acute inflammatory response(0.0831291724726004);aging(0.00347945185390858);amine metabolic process(0.0571200249137145);B cell differentiation(6.7250061992404e-07);cell adhesion(0.000430665088206722);cell chemotaxis(0.208015472637865);cellular response to glucose stimulus(0.204936812361268);cellular response to tumor necrosis factor(0.0280590854795895);cellular response to vascular endothelial gro…
P54725	RAD23A	viral process	1.29423e-116	nucleotide-excision repair(3.14593488271296e-11);positive regulation of viral genome replication(0.000984905592001006);proteasomal ubiquitin-dependent protein catabolic process(1.56895749745146e-14);regulation of proteasomal ubiquitin-dependent protein catabolic process(0.000484562496746678);viral process(1.29423059754579e-116)
P62258	YWHAE	viral process	1.29423e-116	apoptotic process(1.60956479031183e-71);apoptotic signaling pathway(3.36273737543266e-12);cerebral cortex development(0.041187679000422);G2/M transition of mitotic cell cycle(1.84493168112259e-17);hippo signaling cascade(0.103216331924549);hippocampus development(0.000104495333951889);intracellular signal transduction(3.536816246406e-05);intrinsic apoptotic signaling pathway(3.99605787326589e-15)…
Q15942	ZYX	viral process	1.29423e-116	cell adhesion(0.000430665088206722);cell-cell signaling(0.000105528979094638);regulation of inflammatory response(0.0192553858485209);signal transduction(7.20572376729447e-15);viral process(1.29423059754579e-116)
P15927	RPA2	mitotic cell cycle	1.03786e-97	base-excision repair(0.000134434648774011);DNA recombinase assembly(2.05340378689275e-07);DNA repair(7.17980175390962e-15);DNA replication(4.36786219315558e-07);DNA strand elongation involved in DNA replication(8.59694503506994e-05);double-strand break repair(3.14731594107584e-11);double-strand break repair via homologous recombination(1.30823451982617e-08);G1/S transition of mitotic cell cycle(1…	mitotic cell cycle
P02545	LMNA	mitotic cell cycle	1.03786e-97	activation of signaling protein activity involved in unfolded protein response(0.0128352439445557);apoptotic process(1.60956479031183e-71);cellular component disassembly involved in execution phase of apoptosis(2.33618657633773e-07);cellular protein metabolic process(7.74482560391506e-08);cellular response to hypoxia(9.9709061322379e-08);endoplasmic reticulum unfolded protein response(0.000197250…	mitotic cell cycle
P61981	YWHAG	mitotic cell cycle	1.03786e-97	apoptotic process(1.60956479031183e-71);cellular response to insulin stimulus(0.00349316590897353);G2/M transition of mitotic cell cycle(1.84493168112259e-17);intrinsic apoptotic signaling pathway(3.99605787326589e-15);membrane organization(1.23617602505467e-22);mitotic cell cycle(1.03786257064852e-97);negative regulation of protein kinase activity(0.00263212534949245);negative regulation of prot…	mitotic cell cycle
Q14204	DYNC1H1	mitotic cell cycle	1.03786e-97	antigen processing and presentation of exogenous peptide antigen via MHC class II(1.41073868646436e-05);cell death(6.0225493817458e-07);cytoplasmic mRNA processing body assembly(0.0371568943273117);G2/M transition of mitotic cell cycle(1.84493168112259e-17);microtubule-based movement(0.00258019997060106);mitotic cell cycle(1.03786257064852e-97);mitotic spindle organization(1.9150582342875e-05);st…	mitotic cell cycle
P06493	CDK1	mitotic cell cycle	1.03786e-97	activation of MAPK activity(4.09889172460732e-08);activation of MAPKK activity(1.91344197194e-11);anaphase-promoting complex-dependent proteasomal ubiquitin-dependent protein catabolic process(3.27380572874093e-80);apoptotic process(1.60956479031183e-71);axon guidance(5.08132805034548e-13);cell aging(0.000104495333951889);cell migration(5.24949754846966e-09);cellular response to hydrogen peroxide…	mitotic cell cycle
P35244	RPA3	mitotic cell cycle	1.03786e-97	base-excision repair(0.000134434648774011);DNA recombinase assembly(2.05340378689275e-07);DNA repair(7.17980175390962e-15);DNA replication(4.36786219315558e-07);DNA strand elongation involved in DNA replication(8.59694503506994e-05);double-strand break repair(3.14731594107584e-11);double-strand break repair via homologous recombination(1.30823451982617e-08);G1/S transition of mitotic cell cycle(1…	mitotic cell cycle
O00716	E2F3	mitotic cell cycle	1.03786e-97	mitotic cell cycle(1.03786257064852e-97);G2 phase of mitotic cell cycle(1.70610731337026e-06);Notch signaling pathway(3.17407748938646e-13);positive regulation of cell proliferation(1.6005548826857e-14);positive regulation of transcription, DNA-dependent(1.46809690861076e-17);transcription initiation from RNA polymerase II promoter(3.42094464534599e-15)	mitotic cell cycle
P30304	CDC25A	mitotic cell cycle	1.03786e-97	cell proliferation(1.66117760276388e-05);cellular response to UV(6.9002151427879e-05);DNA replication(4.36786219315558e-07);G1/S transition of mitotic cell cycle(1.44739329752639e-76);G2/M transition of mitotic cell cycle(1.84493168112259e-17);mitotic cell cycle(1.03786257064852e-97);mitosis(2.87144545142622e-13);regulation of cell cycle(0.000255663254626443);regulation of cyclin-dependent protei…	mitotic cell cycle
P24941	CDK2	mitotic cell cycle	1.03786e-97	anaphase-promoting complex-dependent proteasomal ubiquitin-dependent protein catabolic process(3.27380572874093e-80);blood coagulation(1.95256501598454e-26);cellular response to nitric oxide(0.0162782507566458);centrosome duplication(0.0761975040404053);DNA damage response, signal transduction by p53 class mediator resulting in cell cycle arrest(7.47470719440689e-80);DNA repair(7.17980175390962e-…	mitotic cell cycle
Q99496	RNF2	mitotic cell cycle	1.03786e-97	anterior/posterior axis specification(0.0041015713865996);gastrulation with mouth forming second(0.01839931492182);histone H2A monoubiquitination(0.000404910053636601);histone H2A-K119 monoubiquitination(0.00275056491261);mitotic cell cycle(1.03786257064852e-97);negative regulation of transcription from RNA polymerase II promoter(5.96926349567125e-28);transcription, DNA-dependent(9.84755462157454…	mitotic cell cycle
P07900	HSP90AA1	mitotic cell cycle	1.03786e-97	ATP catabolic process(7.53610798013254e-16);axon guidance(5.08132805034548e-13);chaperone-mediated protein complex assembly(0.0522134236386405);Fc-gamma receptor signaling pathway involved in phagocytosis(1.71184443448831e-08);G2/M transition of mitotic cell cycle(1.84493168112259e-17);innate immune response(1.94352580596968e-36);mitochondrial transport(0.00387780865784494);mitotic cell cycle(1.0…	mitotic cell cycle
Q9Y266	NUDC	mitotic cell cycle	1.03786e-97	cell proliferation(1.66117760276388e-05);mitotic cell cycle(1.03786257064852e-97);mitosis(2.87144545142622e-13);multicellular organismal development(0.180636142791529)	mitotic cell cycle
P43034	PAFAH1B1	mitotic cell cycle	1.03786e-97	acrosome assembly(0.0472510119104727);actin cytoskeleton organization(0.0411159674983478);adult locomotory behavior(0.0331248906910572);ameboidal cell migration(0.0522134236386405);brain morphogenesis(0.00663996779902096);cerebral cortex development(0.041187679000422);cerebral cortex neuron differentiation(0.0472510119104727);corpus callosum morphogenesis(0.0242169609192454);establishment of cent…	mitotic cell cycle
Q9BV73	CEP250	mitotic cell cycle	1.03786e-97	centriole-centriole cohesion(0.0162782507566458);G2/M transition of mitotic cell cycle(1.84493168112259e-17);mitotic cell cycle(1.03786257064852e-97);protein localization(1.72241795501164e-08);protein localization to organelle(0.00303999947332981);regulation of centriole-centriole cohesion(7.54580457702938e-06)	mitotic cell cycle
P53350	PLK1	mitotic cell cycle	1.03786e-97	activation of mitotic anaphase-promoting complex activity(0.0136025267425634);anaphase-promoting complex-dependent proteasomal ubiquitin-dependent protein catabolic process(3.27380572874093e-80);cell proliferation(1.66117760276388e-05);centrosome organization(0.146142340879894);cytokinesis(4.89086023194942e-09);establishment of protein localization(2.71111722906627e-06);G2 DNA damage checkpoint(0…	mitotic cell cycle
P46060	RANGAP1	mitotic cell cycle	1.03786e-97	mitotic cell cycle(1.03786257064852e-97);negative regulation of protein export from nucleus(0.0215854071352867);positive regulation of Ran GTPase activity(7.48403373875046e-05);signal transduction(7.20572376729447e-15)	mitotic cell cycle
Q15021	NCAPD2	mitotic cell cycle	1.03786e-97	mitotic cell cycle(1.03786257064852e-97);mitotic chromosome condensation(0.00904185112754242)	mitotic cell cycle
Q86XR8	CEP57	mitotic cell cycle	1.03786e-97	fibroblast growth factor receptor signaling pathway(2.13408916123923e-20);G2/M transition of mitotic cell cycle(1.84493168112259e-17);microtubule anchoring(0.00780147726518649);mitotic cell cycle(1.03786257064852e-97);protein homooligomerization(5.16979657640655e-06);protein import into nucleus, translocation(0.0121055919369963);spermatid development(0.222816546646976)	mitotic cell cycle
P68400	CSNK2A1	mitotic cell cycle	1.03786e-97	axon guidance(5.08132805034548e-13);chaperone-mediated protein folding(0.101036059105008);mitotic cell cycle(1.03786257064852e-97);mitotic spindle checkpoint(0.0215854071352867);negative regulation of cysteine-type endopeptidase activity involved in apoptotic process(0.00332585951898295);positive regulation of cell growth(1.18087925460409e-05);positive regulation of cell proliferation(1.600554882…	mitotic cell cycle
P27694	RPA1	mitotic cell cycle	1.03786e-97	base-excision repair(0.000134434648774011);DNA recombinase assembly(2.05340378689275e-07);DNA recombination(0.000381071577576368);DNA repair(7.17980175390962e-15);DNA replication(4.36786219315558e-07);DNA strand elongation involved in DNA replication(8.59694503506994e-05);DNA-dependent DNA replication(0.0715095636734823);double-strand break repair(3.14731594107584e-11);double-strand break repair …	mitotic cell cycle
Q8WYP5	AHCTF1	mitotic cell cycle	1.03786e-97	cytokinesis(4.89086023194942e-09);mitotic cell cycle(1.03786257064852e-97);mRNA transport(8.14144975279126e-08);nuclear pore complex assembly(7.14774038665825e-07);protein transport(6.05535425371772e-09)	mitotic cell cycle
O60216	RAD21	mitotic cell cycle	1.03786e-97	apoptotic process(1.60956479031183e-71);chromosome segregation(0.00215805169191897);DNA recombination(0.000381071577576368);double-strand break repair(3.14731594107584e-11);mitotic cell cycle(1.03786257064852e-97);mitosis(2.87144545142622e-13);protein localization to chromatin(2.25754740147825e-05);reciprocal meiotic recombination(0.103216331924549);regulation of transcription from RNA polymerase…	mitotic cell cycle
Q8NHY2	RFWD2	DNA damage response, signal transduction by p53 class mediator resulting in cell cycle arrest	7.47471e-80	DNA damage response, signal transduction by p53 class mediator resulting in cell cycle arrest(7.47470719440689e-80);protein ubiquitination(1.8050738961922e-14)
Q13618	CUL3	G1/S transition of mitotic cell cycle	1.44739e-76	anaphase(0.00548603821606595);cell cycle arrest(1.7152206219654e-09);cell migration(5.24949754846966e-09);COPII vesicle coating(0.080831907737257);cyclin catabolic process(0.0162782507566458);cytokinesis(4.89086023194942e-09);embryonic cleavage(0.0497392230538323);ER to Golgi vesicle-mediated transport(0.000565484216843169);G1/S transition of mitotic cell cycle(1.44739329752639e-76);gastrulation(…
P10242	MYB	G1/S transition of mitotic cell cycle	1.44739e-76	B cell differentiation(6.7250061992404e-07);blood coagulation(1.95256501598454e-26);calcium ion transport(0.0604168192156532);chromatin remodeling(4.15107920435725e-08);embryonic digestive tract development(0.0595525409653865);G1/S transition of mitotic cell cycle(1.44739329752639e-76);homeostasis of number of cells(0.0546736716631625);in utero embryonic development(3.89958211142535e-08);negative…
Q9Y4K3	TRAF6	protein polyubiquitination	1.23008e-75	activation of MAPK activity(4.09889172460732e-08);activation of NF-kappaB-inducing kinase activity(0.00608974494907792);activation of protein kinase activity(0.00433095472916173);antigen processing and presentation of exogenous peptide antigen via MHC class II(1.41073868646436e-05);apoptotic signaling pathway(3.36273737543266e-12);bone resorption(3.86239191075843e-07);cell development(0.085413219…	protein polyubiquitination
Q9UMS4	PRPF19	protein polyubiquitination	1.23008e-75	DNA repair(7.17980175390962e-15);inner cell mass cell proliferation(0.0831291724726004);lipid biosynthetic process(0.0715095636734823);mRNA splicing, via spliceosome(5.44717536491439e-43);negative regulation of neuron differentiation(0.00500800825676435);positive regulation of astrocyte differentiation(0.044748731997622);positive regulation of mRNA splicing, via spliceosome(1.14051742122865e-06);…	protein polyubiquitination
O60260	PARK2	protein polyubiquitination	1.23008e-75	aggresome assembly(1.11585298644265e-05);cell death(6.0225493817458e-07);cellular protein catabolic process(0.0422323248909385);central nervous system development(0.00900407162180002);mitochondrion degradation(0.000664457509111089);negative regulation of actin filament bundle assembly(0.0136025267425634);negative regulation of cell death(0.0155205305887655);negative regulation of glucokinase acti…	protein polyubiquitination
Q7L622	G2E3	protein polyubiquitination	1.23008e-75	apoptotic process(1.60956479031183e-71);blastocyst development(3.40111052385723e-06);negative regulation of intrinsic apoptotic signaling pathway(0.00027866331245819);protein polyubiquitination(1.23007800708889e-75)	protein polyubiquitination
Q9UKV5	AMFR	protein polyubiquitination	1.23008e-75	aging(0.00347945185390858);cellular component movement(0.00421108156341786);endoplasmic reticulum unfolded protein response(0.000197250728873074);ER-associated protein catabolic process(0.000296850519068741);learning or memory(0.00203287216569141);protein oligomerization(0.130420750310147);protein polyubiquitination(1.23007800708889e-75);signal transduction(7.20572376729447e-15);ubiquitin-depende…	protein polyubiquitination
Q9UHX1	PUF60	apoptotic process	1.60956e-71	apoptotic process(1.60956479031183e-71);mRNA processing(1.72921648580983e-19);regulation of transcription, DNA-dependent(1.22901328835568e-09);RNA splicing(5.31405344997076e-48);transcription, DNA-dependent(9.84755462157454e-28)	apoptotic process
Q12933	TRAF2	apoptotic process	1.60956e-71	activation of cysteine-type endopeptidase activity involved in apoptotic process(0.00025205808538854);activation of NF-kappaB-inducing kinase activity(0.00608974494907792);apoptotic process(1.60956479031183e-71);apoptotic signaling pathway(3.36273737543266e-12);cellular protein complex assembly(0.0167314336954609);innate immune response(1.94352580596968e-36);negative regulation of glial cell apop…	apoptotic process
P34947	GRK5	apoptotic process	1.60956e-71	adenylate cyclase-modulating G-protein coupled receptor signaling pathway(0.0113932764532169);apoptotic process(1.60956479031183e-71);negative regulation of apoptotic process(7.25354615620933e-67);protein autophosphorylation(1.31789450525137e-07);regulation of G-protein coupled receptor protein signaling pathway(0.0135818822028182);tachykinin receptor signaling pathway(0.0268339123440405);termina…	apoptotic process
P19838	NFKB1	apoptotic process	1.60956e-71	apoptotic process(1.60956479031183e-71);cellular response to interleukin-1(0.132427597526889);cellular response to interleukin-6(0.0268339123440405);cellular response to lipopolysaccharide(0.000121465976294794);cellular response to mechanical stimulus(8.2832570367042e-07);cellular response to nicotine(0.222816546646976);cellular response to peptide hormone stimulus(0.000335452034964557);Fc-epsilo…	apoptotic process
Q9H1Y0	ATG5	apoptotic process	1.60956e-71	apoptotic process(1.60956479031183e-71);autophagic vacuole assembly(1.92184497349828e-11);autophagy(4.09825094665714e-07);blood vessel remodeling(0.193841950043629);heart contraction(0.0595525409653865);innate immune response(1.94352580596968e-36);negative regulation of apoptotic process(7.25354615620933e-67);negative regulation of protein ubiquitination(3.79089261853436e-06);negative regulation …	apoptotic process
Q9UNN5	FAF1	apoptotic process	1.60956e-71	apoptotic process(1.60956479031183e-71);cell death(6.0225493817458e-07);cytoplasmic sequestering of NF-kappaB(0.0189391906140591);positive regulation of apoptotic process(2.1460463866238e-18);positive regulation of extrinsic apoptotic signaling pathway via death domain receptors(0.00433095472916173);positive regulation of protein complex assembly(3.93096234259563e-08);proteasomal ubiquitin-depend…	apoptotic process
P15924	DSP	apoptotic process	1.60956e-71	adherens junction organization(0.132427597526889);apoptotic process(1.60956479031183e-71);bundle of His cell to Purkinje myocyte communication(0.000207837482733159);cellular component disassembly involved in execution phase of apoptosis(2.33618657633773e-07);desmosome organization(0.0162782507566458);epidermis development(0.0256316604747293);intermediate filament organization(0.0497392230538323);…	apoptotic process
Q14289	PTK2B	apoptotic process	1.60956e-71	activation of Janus kinase activity(0.0136025267425634);activation of Rac GTPase activity(0.000871418933545523);apoptotic process(1.60956479031183e-71);blood vessel endothelial cell migration(0.000664457509111089);bone resorption(3.86239191075843e-07);cell surface receptor signaling pathway(5.13629142650821e-05);cellular defense response(0.000634134685189678);cellular response to retinoic acid(0.…	apoptotic process
P38398	BRCA1	apoptotic process	1.60956e-71	androgen receptor signaling pathway(8.93821162758304e-06);apoptotic process(1.60956479031183e-71);response to DNA damage stimulus(4.75418310877754e-13);cellular response to indole-3-methanol(7.48403373875046e-05);chromosome segregation(0.00215805169191897);DNA damage response, signal transduction by p53 class mediator resulting in transcription of p21 class mediator(2.61418293659446e-05);DNA repa…	apoptotic process
P27348	YWHAQ	apoptotic process	1.60956e-71	apoptotic process(1.60956479031183e-71);intrinsic apoptotic signaling pathway(3.99605787326589e-15);membrane organization(1.23617602505467e-22);negative regulation of transcription, DNA-dependent(4.71197011663288e-21);positive regulation of protein insertion into mitochondrial membrane involved in apoptotic signaling pathway(1.16406378248343e-10);protein targeting(5.90922772503701e-08);small GTPa…	apoptotic process
Q04917	YWHAH	apoptotic process	1.60956e-71	apoptotic process(1.60956479031183e-71);glucocorticoid catabolic process(0.00275056491261);glucocorticoid receptor signaling pathway(0.000111953336075735);intracellular protein transport(0.0429159115730439);intrinsic apoptotic signaling pathway(3.99605787326589e-15);membrane depolarization involved in regulation of action potential(0.0785213700938851);membrane organization(1.23617602505467e-22);n…	apoptotic process
P10636	MAPT	apoptotic process	1.60956e-71	adult walking behavior(0.187274635690402);apoptotic process(1.60956479031183e-71);axon cargo transport(3.94579000810524e-05);axon extension(0.00196080398285964);cellular component disassembly involved in execution phase of apoptosis(2.33618657633773e-07);generation of neurons(0.0268339123440405);microtubule cytoskeleton organization(1.79538051099349e-06);mitochondrion transport along microtubule(…	apoptotic process
Q9Y5V3	MAGED1	apoptotic process	1.60956e-71	apoptotic process(1.60956479031183e-71);apoptotic signaling pathway(3.36273737543266e-12);circadian regulation of gene expression(0.0124682728630466);negative regulation of epithelial cell proliferation(0.000176588593525377);negative regulation of transcription, DNA-dependent(4.71197011663288e-21);neurotrophin TRK receptor signaling pathway(5.41361763517048e-33);positive regulation of apoptotic p…	apoptotic process
Q96B97	SH3KBP1	apoptotic process	1.60956e-71	apoptotic process(1.60956479031183e-71);cell migration(5.24949754846966e-09);cell-cell signaling(0.000105528979094638);cytoskeleton organization(0.0696286988986054);endocytosis(1.40261929899212e-09);epidermal growth factor receptor signaling pathway(1.75986367233939e-26);negative regulation of epidermal growth factor receptor signaling pathway(6.36150013632435e-11);regulation of cell shape(2.7231…	apoptotic process
P35222	CTNNB1	apoptotic process	1.60956e-71	adherens junction assembly(0.0189391906140591);androgen receptor signaling pathway(8.93821162758304e-06);anterior/posterior axis specification(0.0041015713865996);apoptotic process(1.60956479031183e-71);bone resorption(3.86239191075843e-07);branching involved in ureteric bud morphogenesis(0.0261111906681309);canonical Wnt receptor signaling pathway(4.34263217195152e-06);canonical Wnt receptor sig…	apoptotic process
P25054	APC	apoptotic process	1.60956e-71	anterior/posterior pattern specification(0.00576268434102646);apoptotic process(1.60956479031183e-71);axis specification(0.039701731951948);axonogenesis(0.0113259617598769);canonical Wnt receptor signaling pathway(4.34263217195152e-06);canonical Wnt receptor signaling pathway involved in negative regulation of apoptotic process(0.00150423157410035);canonical Wnt receptor signaling pathway involve…	apoptotic process
Q13501	SQSTM1	negative regulation of apoptotic process	7.25355e-67	apoptotic signaling pathway(3.36273737543266e-12);autophagy(4.09825094665714e-07);cell differentiation(2.77793779890238e-05);endosomal transport(5.06560321910545e-06);immune system process(0.109680989625622);intracellular signal transduction(3.536816246406e-05);macroautophagy(0.000111953336075735);negative regulation of apoptotic process(7.25354615620933e-67);neurotrophin TRK receptor signaling p…	negative regulation of apoptotic process
Q92769	HDAC2	negative regulation of apoptotic process	7.25355e-67	ATP-dependent chromatin remodeling(0.00365971810313465);blood coagulation(1.95256501598454e-26);cardiac muscle cell development(0.0761975040404053);cellular response to heat(0.000315776177784766);chromatin remodeling(4.15107920435725e-08);circadian regulation of gene expression(0.0124682728630466);dendrite development(0.0201257839653644);embryonic digit morphogenesis(0.0237444032165461);epidermal…	negative regulation of apoptotic process
P00533	EGFR	negative regulation of apoptotic process	7.25355e-67	activation of phospholipase A2 activity by calcium-mediated signaling(0.00548603821606595);activation of phospholipase C activity(3.23029001321683e-05);alkanesulfonate metabolic process(0.0242169609192454);astrocyte activation(0.0522134236386405);axon guidance(5.08132805034548e-13);cell proliferation(1.66117760276388e-05);cell surface receptor signaling pathway(5.13629142650821e-05);cellular resp…	negative regulation of apoptotic process
P02768	ALB	negative regulation of apoptotic process	7.25355e-67	bile acid and bile salt transport(0.0522134236386405);bile acid metabolic process(0.107538743980565);blood coagulation(1.95256501598454e-26);cellular response to starvation(0.00692278474585431);hemolysis by symbiont of host erythrocytes(0.00820648185008414);lipoprotein metabolic process(0.229855932008684);maintenance of mitochondrion location(0.00548603821606595);negative regulation of apoptotic …	negative regulation of apoptotic process
P49841	GSK3B	negative regulation of apoptotic process	7.25355e-67	axon guidance(5.08132805034548e-13);canonical Wnt receptor signaling pathway(4.34263217195152e-06);canonical Wnt receptor signaling pathway involved in positive regulation of apoptotic process(0.000664457509111089);cell migration(5.24949754846966e-09);cellular response to interleukin-3(0.0136025267425634);cellular response to mechanical stimulus(8.2832570367042e-07);circadian rhythm(0.00684322387…	negative regulation of apoptotic process
O95817	BAG3	negative regulation of apoptotic process	7.25355e-67	brain development(0.0552809632605685);cellular response to mechanical stimulus(8.2832570367042e-07);extrinsic apoptotic signaling pathway in absence of ligand(0.021908305322632);extrinsic apoptotic signaling pathway via death domain receptors(0.0128352439445557);negative regulation of apoptotic process(7.25354615620933e-67);negative regulation of striated muscle cell apoptotic process(0.016278250…	negative regulation of apoptotic process
O14879	IFIT3	negative regulation of apoptotic process	7.25355e-67	cellular response to interferon-alpha(0.000984905592001006);cytokine-mediated signaling pathway(8.0809712756812e-14);defense response to virus(0.000553563081713337);negative regulation of apoptotic process(7.25354615620933e-67);negative regulation of cell proliferation(4.1199860439205e-14);response to virus(0.00064416268749648);type I interferon-mediated signaling pathway(0.00532747631634547)	negative regulation of apoptotic process
Q8TDY2	RB1CC1	negative regulation of apoptotic process	7.25355e-67	autophagic vacuole assembly(1.92184497349828e-11);cell cycle(7.03739232831182e-08);heart development(4.81434729645269e-05);JNK cascade(1.55538751203354e-06);liver development(2.68222853381673e-06);negative regulation of apoptotic process(7.25354615620933e-67);negative regulation of extrinsic apoptotic signaling pathway(5.06560321910545e-06);positive regulation of cell size(0.00229629780897073);po…	negative regulation of apoptotic process
P49407	ARRB1	negative regulation of apoptotic process	7.25355e-67	activation of MAPK activity(4.09889172460732e-08);apoptotic DNA fragmentation(0.0831291724726004);blood coagulation(1.95256501598454e-26);follicle-stimulating hormone signaling pathway(0.0189391906140591);G-protein coupled receptor internalization(0.044748731997622);membrane organization(1.23617602505467e-22);negative regulation of apoptotic process(7.25354615620933e-67);negative regulation of ER…	negative regulation of apoptotic process
P49768	PSEN1	negative regulation of apoptotic process	7.25355e-67	activation of MAPKK activity(1.91344197194e-11);amyloid precursor protein catabolic process(0.000332199048044635);anagen(0.00324076121800593);autophagic vacuole assembly(1.92184497349828e-11);beta-amyloid formation(0.0215854071352867);beta-amyloid metabolic process(0.00165012670078572);blood vessel development(0.0237444032165461);brain morphogenesis(0.00663996779902096);Cajal-Retzius cell differe…	negative regulation of apoptotic process
Q13286	CLN3	negative regulation of apoptotic process	7.25355e-67	regulation of action potential(0.0619712771827633);amyloid precursor protein catabolic process(0.000332199048044635);arginine transport(0.00548603821606595);associative learning(0.080831907737257);autophagic vacuole fusion(0.0371568943273117);cell death(6.0225493817458e-07);cellular amino acid metabolic process(0.175373493822206);ceramide metabolic process(0.0715095636734823);cytosolic calcium io…	negative regulation of apoptotic process
Q8NC51	SERBP1	regulation of apoptotic process	4.1846e-66	regulation of apoptotic process(4.18460423341731e-66);regulation of mRNA stability(0.0595525409653865)	regulation of apoptotic process
P12814	ACTN1	regulation of apoptotic process	4.1846e-66	actin crosslink formation(0.00505231718869779);actin filament bundle assembly(0.168334446479182);blood coagulation(1.95256501598454e-26);cell junction assembly(5.64315632785475e-05);extracellular matrix organization(2.73261046410737e-06);focal adhesion assembly(0.00556039630982614);negative regulation of cellular component movement(0.0268339123440405);platelet activation(5.53336882075065e-18);pla…	regulation of apoptotic process
P55072	VCP	regulation of apoptotic process	4.1846e-66	activation of cysteine-type endopeptidase activity involved in apoptotic process(0.00025205808538854);aggresome assembly(1.11585298644265e-05);response to DNA damage stimulus(4.75418310877754e-13);DNA repair(7.17980175390962e-15);double-strand break repair(3.14731594107584e-11);endoplasmic reticulum unfolded protein response(0.000197250728873074);ER to Golgi vesicle-mediated transport(0.000565484…	regulation of apoptotic process
Q69YN4	KIAA1429	RNA splicing	5.31405e-48	mRNA processing(1.72921648580983e-19);RNA splicing(5.31405344997076e-48)	RNA splicing
P78362	SRPK2	RNA splicing	5.31405e-48	angiogenesis(0.000544790896675294);cell differentiation(2.77793779890238e-05);innate immune response(1.94352580596968e-36);intracellular signal transduction(3.536816246406e-05);negative regulation of viral genome replication(0.107538743980565);nuclear speck organization(0.00275056491261);positive regulation of cell cycle(0.138376339575395);positive regulation of cell proliferation(1.6005548826857…	RNA splicing
Q14498	RBM39	RNA splicing	5.31405e-48	mRNA processing(1.72921648580983e-19);regulation of transcription, DNA-dependent(1.22901328835568e-09);RNA processing(0.000141848696658695);RNA splicing(5.31405344997076e-48);transcription, DNA-dependent(9.84755462157454e-28)	RNA splicing
Q9NW13	RBM28	RNA splicing	5.31405e-48	mRNA processing(1.72921648580983e-19);RNA splicing(5.31405344997076e-48)	RNA splicing
Q13148	TARDBP	RNA splicing	5.31405e-48	3_-UTR-mediated mRNA stabilization(2.72886322460709e-08);cell death(6.0225493817458e-07);mRNA processing(1.72921648580983e-19);negative regulation by host of viral transcription(0.000484562496746678);RNA splicing(5.31405344997076e-48);transcription from RNA polymerase II promoter(3.31679247739598e-25)	RNA splicing
Q9UPN6	SCAF8	RNA splicing	5.31405e-48	mRNA processing(1.72921648580983e-19);RNA splicing(5.31405344997076e-48)	RNA splicing
P98175	RBM10	RNA splicing	5.31405e-48	3_-UTR-mediated mRNA stabilization(2.72886322460709e-08);mRNA processing(1.72921648580983e-19);negative regulation of cell proliferation(4.1199860439205e-14);negative regulation of transcription from RNA polymerase II promoter(5.96926349567125e-28);positive regulation of smooth muscle cell apoptotic process(0.00015630580608283);RNA splicing(5.31405344997076e-48)	RNA splicing
Q53GS9	USP39	RNA splicing	5.31405e-48	cell cycle(7.03739232831182e-08);cell division(0.0758751131487269);mRNA processing(1.72921648580983e-19);RNA splicing(5.31405344997076e-48);spliceosomal complex assembly(3.92421898479369e-07);ubiquitin-dependent protein catabolic process(8.0880243337e-16)	RNA splicing
O43143	DHX15	RNA splicing	5.31405e-48	mRNA processing(1.72921648580983e-19);RNA splicing(5.31405344997076e-48)	RNA splicing
Q8WXA9	SREK1	RNA splicing	5.31405e-48	mRNA processing(1.72921648580983e-19);RNA splicing(5.31405344997076e-48)	RNA splicing
P14618	PKM	small molecule metabolic process	1.59305e-47	carbohydrate metabolic process(1.41437070139196e-05);glucose metabolic process(7.90339996487239e-07);glycolysis(0.0222112034577793);programmed cell death(0.0371568943273117);small molecule metabolic process(1.59304882077273e-47)	small molecule metabolic process
P13929	ENO3	small molecule metabolic process	1.59305e-47	aging(0.00347945185390858);carbohydrate metabolic process(1.41437070139196e-05);gluconeogenesis(0.0201257839653644);glucose metabolic process(7.90339996487239e-07);glycolysis(0.0222112034577793);response to drug(3.57032729260235e-10);skeletal muscle tissue regeneration(0.0522134236386405);small molecule metabolic process(1.59304882077273e-47)	small molecule metabolic process
P06733	ENO1	small molecule metabolic process	1.59305e-47	carbohydrate metabolic process(1.41437070139196e-05);gluconeogenesis(0.0201257839653644);glucose metabolic process(7.90339996487239e-07);glycolysis(0.0222112034577793);negative regulation of cell growth(0.00153350084700163);negative regulation of transcription from RNA polymerase II promoter(5.96926349567125e-28);negative regulation of transcription, DNA-dependent(4.71197011663288e-21);response t…	small molecule metabolic process
P30519	HMOX2	small molecule metabolic process	1.59305e-47	cellular iron ion homeostasis(0.0526402325613507);heme catabolic process(0.0242169609192454);heme oxidation(0.0522134236386405);porphyrin-containing compound metabolic process(0.0595525409653865);response to hypoxia(2.12521317151326e-06);response to oxidative stress(5.78649001876266e-08);small molecule metabolic process(1.59304882077273e-47);transmembrane transport(2.19757934340152e-05)	small molecule metabolic process
Q16698	DECR1	small molecule metabolic process	1.59305e-47	cellular lipid metabolic process(0.0114908824820828);fatty acid beta-oxidation(0.124327697753243);protein homotetramerization(0.203382396875698);small molecule metabolic process(1.59304882077273e-47)	small molecule metabolic process
Q16656	NRF1	small molecule metabolic process	1.59305e-47	cellular lipid metabolic process(0.0114908824820828);generation of precursor metabolites and energy(0.00904185112754242);mitochondrion organization(0.00936391362752461);organ regeneration(0.000404364044520992);positive regulation of transcription from RNA polymerase II promoter(1.91663488758372e-22);regulation of transcription from RNA polymerase II promoter(1.33060576332061e-06);response to elec…	small molecule metabolic process
P62158	CALM1	small molecule metabolic process	1.59305e-47	activation of adenylate cyclase activity(0.000198381385816691);activation of phospholipase C activity(3.23029001321683e-05);blood coagulation(1.95256501598454e-26);carbohydrate metabolic process(1.41437070139196e-05);detection of calcium ion(0.0320242485290104);epidermal growth factor receptor signaling pathway(1.75986367233939e-26);Fc-epsilon receptor signaling pathway(6.53521825200287e-17);fibr…	small molecule metabolic process
Q16851	UGP2	small molecule metabolic process	1.59305e-47	carbohydrate metabolic process(1.41437070139196e-05);cellular glucuronidation(0.0422323248909385);glucose 1-phosphate metabolic process(0.0422323248909385);glucose metabolic process(7.90339996487239e-07);glycogen biosynthetic process(0.00904185112754242);small molecule metabolic process(1.59304882077273e-47);UDP-glucose metabolic process(0.0294363215677173);UDP-glucuronate biosynthetic process(0.…	small molecule metabolic process
Q6NZY4	ZCCHC8	mRNA splicing, via spliceosome	5.44718e-43	mRNA splicing, via spliceosome(5.44717536491439e-43)	mRNA splicing, via spliceosome
Q99459	CDC5L	mRNA splicing, via spliceosome	5.44718e-43	cell cycle(7.03739232831182e-08);mRNA splicing, via spliceosome(5.44717536491439e-43);regulation of transcription, DNA-dependent(1.22901328835568e-09);transcription, DNA-dependent(9.84755462157454e-28)	mRNA splicing, via spliceosome
P42285	SKIV2L2	mRNA splicing, via spliceosome	5.44718e-43	maturation of 5.8S rRNA(4.09560007362023e-07);mRNA splicing, via spliceosome(5.44717536491439e-43)	mRNA splicing, via spliceosome
P62995	TRA2B	mRNA splicing, via spliceosome	5.44718e-43	mRNA splicing, via spliceosome(5.44717536491439e-43);positive regulation of mRNA splicing, via spliceosome(1.14051742122865e-06);regulation of alternative mRNA splicing, via spliceosome(0.00324076121800593);RNA splicing, via transesterification reactions(0.00212547613683093)	mRNA splicing, via spliceosome
Q15637	SF1	mRNA splicing, via spliceosome	5.44718e-43	Leydig cell differentiation(0.089941881204014);male sex determination(0.175373493822206);mRNA 3_-splice site recognition(2.05340378689275e-07);mRNA splicing, via spliceosome(5.44717536491439e-43);negative regulation of smooth muscle cell proliferation(0.0128352439445557);regulation of steroid biosynthetic process(0.00136470597123831);regulation of transcription, DNA-dependent(1.22901328835568e-09…	mRNA splicing, via spliceosome
P16333	NCK1	innate immune response	1.94353e-36	actin filament organization(0.041187679000422);axon guidance(5.08132805034548e-13);cell migration(5.24949754846966e-09);Fc-gamma receptor signaling pathway involved in phagocytosis(1.71184443448831e-08);innate immune response(1.94352580596968e-36);lamellipodium assembly(0.0113932764532169);negative regulation of cell death(0.0155205305887655);negative regulation of protein kinase activity(0.00263…	innate immune response
P08238	HSP90AB1	innate immune response	1.94353e-36	axon guidance(5.08132805034548e-13);cellular response to interleukin-4(0.107538743980565);cellular response to organic cyclic compound(0.000100017934699045);Fc-gamma receptor signaling pathway involved in phagocytosis(1.71184443448831e-08);innate immune response(1.94352580596968e-36);negative regulation of neuron apoptotic process(1.66709514698621e-05);negative regulation of proteasomal ubiquitin…	innate immune response
Q9NYJ8	TAB2	innate immune response	1.94353e-36	activation of MAPK activity(4.09889172460732e-08);Fc-epsilon receptor signaling pathway(6.53521825200287e-17);heart development(4.81434729645269e-05);I-kappaB kinase/NF-kappaB cascade(0.000421886699699867);innate immune response(1.94352580596968e-36);JNK cascade(1.55538751203354e-06);MyD88-dependent toll-like receptor signaling pathway(4.46603681505844e-08);MyD88-independent toll-like receptor si…	innate immune response
Q15653	NFKBIB	innate immune response	1.94353e-36	innate immune response(1.94352580596968e-36);MyD88-dependent toll-like receptor signaling pathway(4.46603681505844e-08);MyD88-independent toll-like receptor signaling pathway(1.7615832526922e-12);positive regulation of NF-kappaB transcription factor activity(4.65996006278889e-08);positive regulation of type I interferon production(1.15491687961065e-14);signal transduction(7.20572376729447e-15);to…	innate immune response
P46108	CRK	innate immune response	1.94353e-36	activation of MAPKK activity(1.91344197194e-11);blood coagulation(1.95256501598454e-26);ephrin receptor signaling pathway(0.109680989625622);Fc-gamma receptor signaling pathway involved in phagocytosis(1.71184443448831e-08);innate immune response(1.94352580596968e-36);insulin receptor signaling pathway(3.59815031985675e-05);neurotrophin TRK receptor signaling pathway(5.41361763517048e-33);platele…	innate immune response
Q14164	IKBKE	innate immune response	1.94353e-36	immune response(4.79425365633182e-21);innate immune response(1.94352580596968e-36);intrinsic apoptotic signaling pathway in response to DNA damage(0.00402424923652694);MyD88-independent toll-like receptor signaling pathway(1.7615832526922e-12);negative regulation of type I interferon production(0.000123815755595303);NIK/NF-kappaB cascade(0.0162782507566458);positive regulation of I-kappaB kinase/…	innate immune response
Q9Y2K1	ZBTB1	innate immune response	1.94353e-36	B cell differentiation(6.7250061992404e-07);innate immune response(1.94352580596968e-36);mRNA transcription from RNA polymerase II promoter(0.00110498673958027);negative regulation of transcription from RNA polymerase II promoter(5.96926349567125e-28);positive regulation of natural killer cell differentiation(0.0320242485290104);positive regulation of pro-T cell differentiation(0.00275056491261);…	innate immune response
P49815	TSC2	innate immune response	1.94353e-36	acute-phase response(0.000335452034964557);cell cycle arrest(1.7152206219654e-09);cell projection organization(0.0988430038248773);endocytosis(1.40261929899212e-09);epidermal growth factor receptor signaling pathway(1.75986367233939e-26);Fc-epsilon receptor signaling pathway(6.53521825200287e-17);fibroblast growth factor receptor signaling pathway(2.13408916123923e-20);heart development(4.8143472…	innate immune response
P05067	APP	innate immune response	1.94353e-36	adult locomotory behavior(0.0331248906910572);axon cargo transport(3.94579000810524e-05);axon midline choice point recognition(0.0215854071352867);axonogenesis(0.0113259617598769);blood coagulation(1.95256501598454e-26);cell adhesion(0.000430665088206722);cellular copper ion homeostasis(0.0522134236386405);cholesterol metabolic process(0.0373612155763603);collateral sprouting in absence of injury…	innate immune response
Q15811	ITSN1	neurotrophin TRK receptor signaling pathway	5.41362e-33	apoptotic signaling pathway(3.36273737543266e-12);negative regulation of neuron apoptotic process(1.66709514698621e-05);neurotrophin TRK receptor signaling pathway(5.41361763517048e-33);positive regulation of apoptotic process(2.1460463866238e-18);positive regulation of GTPase activity(0.000369786283272985);positive regulation of protein kinase B signaling cascade(0.00025205808538854);regulation …
Q9H8V3	ECT2	neurotrophin TRK receptor signaling pathway	5.41362e-33	activation of protein kinase activity(0.00433095472916173);activation of Rac GTPase activity(0.000871418933545523);activation of Rho GTPase activity(0.00136470597123831);apoptotic signaling pathway(3.36273737543266e-12);cell morphogenesis(0.0468259682720699);cellular response to calcium ion(0.120204724646005);cellular response to hydrogen peroxide(4.04689481716796e-06);cellular response to ionizi…
Q15910	EZH2	negative regulation of transcription from RNA polymerase II promoter	5.96926e-28	cerebellar cortex development(0.0294363215677173);chromatin organization(2.79794872320029e-05);G1 to G0 transition(0.0371568943273117);histone H3-K27 methylation(0.00820648185008414);negative regulation of epidermal cell differentiation(0.0109119575290057);negative regulation of G1/S transition of mitotic cell cycle(0.000158285669661325);negative regulation of gene expression, epigenetic(0.018939…	negative regulation of transcription from RNA polymerase II promoter
Q6P1J9	CDC73	negative regulation of transcription from RNA polymerase II promoter	5.96926e-28	cell cycle(7.03739232831182e-08);cellular response to lipopolysaccharide(0.000121465976294794);endodermal cell fate commitment(0.000571097750020978);histone H2B ubiquitination(0.0215854071352867);histone monoubiquitination(0.0294363215677173);mRNA polyadenylation(8.04995619123631e-08);negative regulation of cell proliferation(4.1199860439205e-14);negative regulation of epithelial cell proliferati…	negative regulation of transcription from RNA polymerase II promoter
O96028	WHSC1	negative regulation of transcription from RNA polymerase II promoter	5.96926e-28	anatomical structure morphogenesis(0.0246817857394197);atrial septum primum morphogenesis(0.0189391906140591);atrial septum secundum morphogenesis(0.0136025267425634);bone development(0.203382396875698);membranous septum morphogenesis(0.0371568943273117);negative regulation of transcription from RNA polymerase II promoter(5.96926349567125e-28);transcription, DNA-dependent(9.84755462157454e-28)	negative regulation of transcription from RNA polymerase II promoter
P56524	HDAC4	negative regulation of transcription from RNA polymerase II promoter	5.96926e-28	B cell activation(0.00556039630982614);B cell differentiation(6.7250061992404e-07);cardiac muscle hypertrophy in response to stress(0.0643762907206426);chromatin remodeling(4.15107920435725e-08);histone deacetylation(1.16616056081503e-08);histone H3 deacetylation(3.93096234259563e-08);histone H4 deacetylation(5.74573582535139e-06);inflammatory response(0.00397962465528234);negative regulation of …	negative regulation of transcription from RNA polymerase II promoter
P51858	HDGF	negative regulation of transcription from RNA polymerase II promoter	5.96926e-28	activation of signaling protein activity involved in unfolded protein response(0.0128352439445557);cell proliferation(1.66117760276388e-05);cellular protein metabolic process(7.74482560391506e-08);endoplasmic reticulum unfolded protein response(0.000197250728873074);negative regulation of transcription from RNA polymerase II promoter(5.96926349567125e-28);signal transduction(7.20572376729447e-15)	negative regulation of transcription from RNA polymerase II promoter
Q9NRC8	SIRT7	negative regulation of transcription from RNA polymerase II promoter	5.96926e-28	histone H3 deacetylation(3.93096234259563e-08);histone H4 deacetylation(5.74573582535139e-06);negative regulation of transcription from RNA polymerase II promoter(5.96926349567125e-28);positive regulation of transcription on exit from mitosis(0.00275056491261);rRNA transcription(0.000261202647521844)	negative regulation of transcription from RNA polymerase II promoter
P54259	ATN1	negative regulation of transcription from RNA polymerase II promoter	5.96926e-28	cell migration(5.24949754846966e-09);central nervous system development(0.00900407162180002);maintenance of cell polarity(0.0109119575290057);negative regulation of transcription from RNA polymerase II promoter(5.96926349567125e-28);neuron apoptotic process(1.74513464688566e-05);toxin metabolic process(0.0472510119104727);transcription, DNA-dependent(9.84755462157454e-28)	negative regulation of transcription from RNA polymerase II promoter
Q15022	SUZ12	negative regulation of transcription from RNA polymerase II promoter	5.96926e-28	histone ubiquitination(0.0320242485290104);negative regulation of cell differentiation(0.000634134685189678);negative regulation of transcription from RNA polymerase II promoter(5.96926349567125e-28);positive regulation of cell proliferation(1.6005548826857e-14);transcription, DNA-dependent(9.84755462157454e-28)	negative regulation of transcription from RNA polymerase II promoter
Q9UQL6	HDAC5	negative regulation of transcription from RNA polymerase II promoter	5.96926e-28	B cell activation(0.00556039630982614);B cell differentiation(6.7250061992404e-07);cellular response to insulin stimulus(0.00349316590897353);chromatin modification(0.00459958676380952);chromatin organization(2.79794872320029e-05);chromatin remodeling(4.15107920435725e-08);chromatin silencing(0.000664457509111089);heart development(4.81434729645269e-05);histone deacetylation(1.16616056081503e-08)…	negative regulation of transcription from RNA polymerase II promoter
O75506	HSBP1	negative regulation of transcription from RNA polymerase II promoter	5.96926e-28	muscle contraction(1.77349924224367e-06);negative regulation of transcription from RNA polymerase II promoter(5.96926349567125e-28)	negative regulation of transcription from RNA polymerase II promoter
Q9Y5K5	UCHL5	transcription, DNA-dependent	9.84755e-28	DNA recombination(0.000381071577576368);DNA repair(7.17980175390962e-15);forebrain morphogenesis(0.0546736716631625);lateral ventricle development(0.080831907737257);midbrain development(0.291052442556766);negative regulation of endopeptidase activity(0.00203287216569141);negative regulation of transforming growth factor beta receptor signaling pathway(1.3487197941186e-09);protein deubiquitinatio…	transcription, DNA-dependent
Q9P2J8	ZNF624	transcription, DNA-dependent	9.84755e-28	regulation of transcription, DNA-dependent(1.22901328835568e-09);transcription, DNA-dependent(9.84755462157454e-28)	transcription, DNA-dependent
Q96DB2	HDAC11	transcription, DNA-dependent	9.84755e-28	chromatin modification(0.00459958676380952);histone deacetylation(1.16616056081503e-08);oligodendrocyte development(0.10538387578232);regulation of transcription, DNA-dependent(1.22901328835568e-09);transcription, DNA-dependent(9.84755462157454e-28)	transcription, DNA-dependent
Q99623	PHB2	transcription, DNA-dependent	9.84755e-28	mammary gland alveolus development(0.020566257122334);mammary gland branching involved in thelarche(0.0294363215677173);negative regulation of intracellular estrogen receptor signaling pathway(0.0345977529480911);negative regulation of mammary gland epithelial cell proliferation(0.0189391906140591);negative regulation of transcription, DNA-dependent(4.71197011663288e-21);regulation of branching i…	transcription, DNA-dependent
Q12905	ILF2	transcription, DNA-dependent	9.84755e-28	immune response(4.79425365633182e-21);positive regulation of transcription, DNA-dependent(1.46809690861076e-17);transcription, DNA-dependent(9.84755462157454e-28)	transcription, DNA-dependent
Q6ZW49	PAXIP1	transcription, DNA-dependent	9.84755e-28	adipose tissue development(0.0921866052699077);chorion development(0.0242169609192454);DNA damage response, signal transduction by p53 class mediator(3.94579000810524e-05);DNA recombination(0.000381071577576368);DNA repair(7.17980175390962e-15);endothelial cell migration(0.118124801981616);histone H3-K4 methylation(0.00136470597123831);positive regulation of histone acetylation(2.61418293659446e-…	transcription, DNA-dependent
Q6P2D0	ZFP1	transcription, DNA-dependent	9.84755e-28	regulation of transcription, DNA-dependent(1.22901328835568e-09);transcription, DNA-dependent(9.84755462157454e-28)	transcription, DNA-dependent
O75592	MYCBP2	transcription, DNA-dependent	9.84755e-28	branchiomotor neuron axon guidance(0.00275056491261);central nervous system projection neuron axonogenesis(0.0497392230538323);regulation of cytoskeleton organization(1.9150582342875e-05);regulation of protein localization(0.0214575564830677);regulation of transcription, DNA-dependent(1.22901328835568e-09);transcription, DNA-dependent(9.84755462157454e-28)	transcription, DNA-dependent
Q15424	SAFB	transcription, DNA-dependent	9.84755e-28	chromatin organization(2.79794872320029e-05);growth(0.198658284969425);hormone metabolic process(0.00365971810313465);intracellular estrogen receptor signaling pathway(0.00165012670078572);positive regulation of transcription from RNA polymerase II promoter(1.91663488758372e-22);transcription, DNA-dependent(9.84755462157454e-28)	transcription, DNA-dependent
O75530	EED	transcription, DNA-dependent	9.84755e-28	negative regulation of transcription, DNA-dependent(4.71197011663288e-21);positive regulation of histone H3-K27 methylation(0.0268339123440405);regulation of gene expression by genetic imprinting(0.0084119955066535);transcription, DNA-dependent(9.84755462157454e-28)	transcription, DNA-dependent
Q01844	EWSR1	transcription, DNA-dependent	9.84755e-28	regulation of transcription, DNA-dependent(1.22901328835568e-09);transcription, DNA-dependent(9.84755462157454e-28)	transcription, DNA-dependent
Q9UBL3	ASH2L	transcription, DNA-dependent	9.84755e-28	response to DNA damage stimulus(4.75418310877754e-13);hemopoiesis(0.0389881445128597);histone H3-K4 methylation(0.00136470597123831);positive regulation of cell proliferation(1.6005548826857e-14);positive regulation of transcription from RNA polymerase II promoter(1.91663488758372e-22);regulation of transcription, DNA-dependent(1.22901328835568e-09);response to estrogen stimulus(0.001655851234759…	transcription, DNA-dependent
P42566	EPS15	epidermal growth factor receptor signaling pathway	1.75986e-26	cell proliferation(1.66117760276388e-05);clathrin coat assembly(0.107538743980565);endocytic recycling(0.0522134236386405);endocytosis(1.40261929899212e-09);epidermal growth factor receptor signaling pathway(1.75986367233939e-26);Golgi to endosome transport(0.039701731951948);negative regulation of epidermal growth factor receptor signaling pathway(6.36150013632435e-11);protein transport(6.055354…
O14964	HGS	epidermal growth factor receptor signaling pathway	1.75986e-26	endosomal transport(5.06560321910545e-06);endosome to lysosome transport(0.00387780865784494);epidermal growth factor receptor signaling pathway(1.75986367233939e-26);intracellular protein transport(0.0429159115730439);membrane organization(1.23617602505467e-22);negative regulation of cell proliferation(4.1199860439205e-14);negative regulation of epidermal growth factor receptor signaling pathway…
Q12866	MERTK	blood coagulation	1.95257e-26	apoptotic cell clearance(0.111810665628598);blood coagulation(1.95256501598454e-26);cell surface receptor signaling pathway(5.13629142650821e-05);cell-cell signaling(0.000105528979094638);leukocyte migration(3.77766584918587e-09);natural killer cell differentiation(0.0876841042110782);negative regulation of lymphocyte activation(0.0371568943273117);peptidyl-tyrosine phosphorylation(1.696241860650…
P20339	RAB5A	blood coagulation	1.95257e-26	blood coagulation(1.95256501598454e-26);cell differentiation(2.77793779890238e-05);endocytosis(1.40261929899212e-09);GTP catabolic process(0.0182518751089744);nervous system development(0.174208562225351);positive regulation of exocytosis(0.0571200249137145);protein transport(6.05535425371772e-09);receptor internalization involved in canonical Wnt receptor signaling pathway(0.00820648185008414);r…
Q9Y496	KIF3A	blood coagulation	1.95257e-26	anterior/posterior pattern specification(0.00576268434102646);antigen processing and presentation of exogenous peptide antigen via MHC class II(1.41073868646436e-05);blood coagulation(1.95256501598454e-26);cilium assembly(8.01723239720453e-05);determination of left/right symmetry(0.170110695365613);dorsal/ventral neural tube patterning(0.00387780865784494);heart development(4.81434729645269e-05);…
P21333	FLNA	blood coagulation	1.95257e-26	actin crosslink formation(0.00505231718869779);actin cytoskeleton reorganization(0.0237444032165461);adenylate cyclase-inhibiting dopamine receptor signaling pathway(0.0715095636734823);blood coagulation(1.95256501598454e-26);cell junction assembly(5.64315632785475e-05);cilium assembly(8.01723239720453e-05);cytoplasmic sequestering of protein(0.00820648185008414);early endosome to late endosome t…
P84243	H3F3A	blood coagulation	1.95257e-26	blood coagulation(1.95256501598454e-26);brain development(0.0552809632605685);DNA replication-independent nucleosome assembly(0.000484562496746678);positive regulation of cell growth(1.18087925460409e-05);response to hormone stimulus(0.0167314336954609)
P02751	FN1	blood coagulation	1.95257e-26	acute-phase response(0.000335452034964557);angiogenesis(0.000544790896675294);blood coagulation(1.95256501598454e-26);calcium-independent cell-matrix adhesion(0.000207837482733159);cell adhesion(0.000430665088206722);cell-substrate junction assembly(0.0667676385247506);extracellular matrix disassembly(0.0357547010681218);extracellular matrix organization(2.73261046410737e-06);leukocyte migration(…
Q8WZ42	TTN	blood coagulation	1.95257e-26	adult heart development(0.080831907737257);blood coagulation(1.95256501598454e-26);cardiac muscle contraction(0.0196888137863819);cardiac muscle fiber development(0.0320242485290104);cardiac muscle hypertrophy(0.0294363215677173);cardiac muscle tissue morphogenesis(0.0595525409653865);cardiac myofibril assembly(0.0619712771827633);detection of muscle stretch(0.0109119575290057);forward locomotion…
P43119	PTGIR	blood coagulation	1.95257e-26	adenylate cyclase-activating G-protein coupled receptor signaling pathway(0.0151247366567254);blood coagulation(1.95256501598454e-26);cell-cell signaling(0.000105528979094638);G-protein coupled receptor signaling pathway, coupled to cyclic nucleotide second messenger(0.10538387578232);negative regulation of platelet-derived growth factor receptor signaling pathway(0.0242169609192454);negative reg…
Q92905	COPS5	transcription from RNA polymerase II promoter	3.31679e-25	cullin deneddylation(0.0242169609192454);positive regulation of transcription from RNA polymerase II promoter(1.91663488758372e-22);protein deneddylation(0.00820648185008414);protein deubiquitination(0.00110230051710363);regulation of cell cycle(0.000255663254626443);regulation of JNK cascade(0.0595525409653865);transcription from RNA polymerase II promoter(3.31679247739598e-25);translation(0.013…	transcription from RNA polymerase II promoter
Q01664	TFAP4	transcription from RNA polymerase II promoter	3.31679e-25	cellular response to dexamethasone stimulus(0.00303999947332981);DNA damage response, signal transduction by p53 class mediator resulting in transcription of p21 class mediator(2.61418293659446e-05);negative regulation by host of viral transcription(0.000484562496746678);negative regulation of cell cycle arrest(0.00904185112754242);negative regulation of cell proliferation(4.1199860439205e-14);ne…	transcription from RNA polymerase II promoter
Q12888	TP53BP1	transcription from RNA polymerase II promoter	3.31679e-25	response to DNA damage stimulus(4.75418310877754e-13);DNA repair(7.17980175390962e-15);double-strand break repair(3.14731594107584e-11);double-strand break repair via homologous recombination(1.30823451982617e-08);positive regulation of sequence-specific DNA binding transcription factor activity(5.06170577128012e-11);positive regulation of transcription from RNA polymerase II promoter(1.916634887…	transcription from RNA polymerase II promoter
P20338	RAB4A	membrane organization	1.23618e-22	antigen processing and presentation(0.214363064742776);GTP catabolic process(0.0182518751089744);membrane organization(1.23617602505467e-22);regulation of endocytosis(0.00344735157467774);small GTPase mediated signal transduction(6.72603498179059e-05)	membrane organization
Q9Y478	PRKAB1	membrane organization	1.23618e-22	cell cycle arrest(1.7152206219654e-09);fatty acid biosynthetic process(0.0280590854795895);insulin receptor signaling pathway(3.59815031985675e-05);membrane organization(1.23617602505467e-22);positive regulation of gene expression(0.00508209755869729);protein heterooligomerization(8.18111784595e-06);protein phosphorylation(1.48053720477804e-12);regulation of catalytic activity(0.00114509461846747…	membrane organization
Q3V6T2	CCDC88A	membrane organization	1.23618e-22	activation of protein kinase B activity(0.080831907737257);cell migration(5.24949754846966e-09);DNA replication(4.36786219315558e-07);lamellipodium assembly(0.0113932764532169);membrane organization(1.23617602505467e-22);regulation of actin cytoskeleton organization(0.0223624024095928);regulation of cell proliferation(0.00283196361177356);regulation of DNA replication(0.0546736716631625);regulati…	membrane organization
Q9Y4I1	MYO5A	membrane organization	1.23618e-22	actin filament-based movement(3.46201534369451e-05);anagen(0.00324076121800593);cellular protein metabolic process(7.74482560391506e-08);cellular response to insulin stimulus(0.00349316590897353);endoplasmic reticulum localization(0.00548603821606595);exocytosis(0.29199106336336);insulin secretion(0.000830341263398029);locomotion involved in locomotory behavior(0.0136025267425634);long-chain fatt…	membrane organization
P07550	ADRB2	positive regulation of transcription from RNA polymerase II promoter	1.91663e-22	activation of adenylate cyclase activity(0.000198381385816691);activation of transmembrane receptor protein tyrosine kinase activity(0.0345977529480911);adenylate cyclase-activating G-protein coupled receptor signaling pathway(0.0151247366567254);adenylate cyclase-modulating G-protein coupled receptor signaling pathway(0.0113932764532169);adrenergic receptor signaling pathway(0.0162782507566458);…
O14981	BTAF1	negative regulation of transcription, DNA-dependent	4.71197e-21	negative regulation of chromatin binding(0.0215854071352867);negative regulation of transcription, DNA-dependent(4.71197011663288e-21)	negative regulation of transcription, DNA-dependent
P63165	SUMO1	negative regulation of transcription, DNA-dependent	4.71197e-21	cellular protein metabolic process(7.74482560391506e-08);cytokine-mediated signaling pathway(8.0809712756812e-14);DNA repair(7.17980175390962e-15);interferon-gamma-mediated signaling pathway(0.00735281611028353);negative regulation of DNA binding(0.00582243675191342);negative regulation of sequence-specific DNA binding transcription factor activity(8.79601294276017e-08);negative regulation of tra…	negative regulation of transcription, DNA-dependent
P55345	PRMT2	negative regulation of transcription, DNA-dependent	4.71197e-21	developmental cell growth(0.00548603821606595);histone arginine methylation(0.0109119575290057);histone methylation(0.0595525409653865);negative regulation of G1/S transition of mitotic cell cycle(0.000158285669661325);negative regulation of NF-kappaB transcription factor activity(0.00222233765437013);negative regulation of transcription, DNA-dependent(4.71197011663288e-21);peptidyl-arginine meth…	negative regulation of transcription, DNA-dependent
P20333	TNFRSF1B	immune response	4.79425e-21	aging(0.00347945185390858);cellular response to growth factor stimulus(0.0580007487145987);cellular response to lipopolysaccharide(0.000121465976294794);immune response(4.79425365633182e-21);inflammatory response(0.00397962465528234);intrinsic apoptotic signaling pathway in response to DNA damage(0.00402424923652694);negative regulation of inflammatory response(0.00600043753751689);positive regul…
Q13123	IK	immune response	4.79425e-21	cell-cell signaling(0.000105528979094638);immune response(4.79425365633182e-21)
O15205	UBD	positive regulation of apoptotic process	2.14605e-18	aggresome assembly(1.11585298644265e-05);myeloid dendritic cell differentiation(0.0018023358884648);positive regulation of apoptotic process(2.1460463866238e-18);positive regulation of I-kappaB kinase/NF-kappaB cascade(7.37641324985847e-11);protein modification by small protein conjugation(0.00820648185008414);protein ubiquitination(1.8050738961922e-14);proteolysis(9.1788991332915e-05);response t…
P54274	TERF1	positive regulation of apoptotic process	2.14605e-18	age-dependent telomere shortening(7.54580457702938e-06);G2/M transition of mitotic cell cycle(1.84493168112259e-17);mitosis(2.87144545142622e-13);mitotic spindle assembly checkpoint(5.68600855243108e-06);negative regulation of DNA replication(0.00872452957742949);negative regulation of telomerase activity(0.000664457509111089);negative regulation of telomere maintenance via semi-conservative repl…
Q96RR4	CAMKK2	positive regulation of transcription, DNA-dependent	1.4681e-17	calcium-mediated signaling(0.0192553858485209);MAPK cascade(2.07308713416664e-11);peptidyl-tyrosine phosphorylation(1.69624186065062e-06);positive regulation of transcription, DNA-dependent(1.46809690861076e-17);protein autophosphorylation(1.31789450525137e-07);protein phosphorylation(1.48053720477804e-12);regulation of protein kinase activity(2.40783023065436e-06)
Q01780	EXOSC10	RNA phosphodiester bond hydrolysis, exonucleolytic	1.60376e-17	CUT catabolic process(0.00820648185008414);dosage compensation by inactivation of X chromosome(0.0738602538706138);histone mRNA catabolic process(2.43064457541219e-06);maturation of 5.8S rRNA(4.09560007362023e-07);nuclear mRNA surveillance(7.48403373875046e-05);nuclear polyadenylation-dependent rRNA catabolic process(0.00548603821606595);nuclear retention of unspliced pre-mRNA at the site of tran…
Q8TCS8	PNPT1	RNA phosphodiester bond hydrolysis, exonucleolytic	1.60376e-17	cellular response to interferon-beta(0.0472510119104727);cellular response to oxidative stress(0.126370851512823);mitochondrial mRNA catabolic process(0.00548603821606595);mitochondrial mRNA polyadenylation(0.00275056491261);mitochondrial RNA 3_-end processing(0.00548603821606595);mitochondrial RNA 5_-end processing(0.00548603821606595);mitochondrial RNA catabolic process(0.00275056491261);mitoch…
P35579	MYH9	ATP catabolic process	7.53611e-16	actin cytoskeleton reorganization(0.0237444032165461);actin filament-based movement(3.46201534369451e-05);actomyosin structure organization(0.00505231718869779);angiogenesis(0.000544790896675294);ATP catabolic process(7.53610798013254e-16);axon guidance(5.08132805034548e-13);blood vessel endothelial cell migration(0.000664457509111089);cytokinesis(4.89086023194942e-09);establishment of meiotic sp…	ATP catabolic process
Q7Z406	MYH14	ATP catabolic process	7.53611e-16	actin filament-based movement(3.46201534369451e-05);actomyosin structure organization(0.00505231718869779);ATP catabolic process(7.53610798013254e-16);axon guidance(5.08132805034548e-13);mitochondrion morphogenesis(0.00265617306237756);regulation of action potential in neuron(0.120204724646005);regulation of cell shape(2.72314606595509e-05);sensory perception of sound(0.313907718230158);skeletal …	ATP catabolic process
O60264	SMARCA5	ATP catabolic process	7.53611e-16	ATP catabolic process(7.53610798013254e-16);ATP-dependent chromatin remodeling(0.00365971810313465);CENP-A containing nucleosome assembly at centromere(0.0667676385247506);chromatin remodeling(4.15107920435725e-08);chromatin silencing at rDNA(9.0911170138229e-06);DNA-dependent transcription, initiation(0.190579232927584);double-strand break repair(3.14731594107584e-11);embryo development(0.302690…	ATP catabolic process
P62253	UBE2G1	ubiquitin-dependent protein catabolic process	8.08802e-16	protein K48-linked ubiquitination(0.000228412473360855);protein K63-linked ubiquitination(2.86420215184955e-10);ubiquitin-dependent protein catabolic process(8.0880243337e-16)	ubiquitin-dependent protein catabolic process
Q15843	NEDD8	ubiquitin-dependent protein catabolic process	8.08802e-16	anatomical structure morphogenesis(0.0246817857394197);cellular protein modification process(0.013209084409749);protein localization(1.72241795501164e-08);protein neddylation(0.0345977529480911);proteolysis(9.1788991332915e-05);regulation of transcription from RNA polymerase II promoter(1.33060576332061e-06);response to organic cyclic compound(0.00635400766520869);transforming growth factor beta …	ubiquitin-dependent protein catabolic process
P51784	USP11	ubiquitin-dependent protein catabolic process	8.08802e-16	protein deubiquitination(0.00110230051710363);ubiquitin-dependent protein catabolic process(8.0880243337e-16)	ubiquitin-dependent protein catabolic process
Q13620	CUL4B	ubiquitin-dependent protein catabolic process	8.08802e-16	cell cycle(7.03739232831182e-08);histone H2A monoubiquitination(0.000404910053636601);positive regulation of G1/S transition of mitotic cell cycle(0.0571200249137145);positive regulation of protein catabolic process(2.84216993812862e-07);ubiquitin-dependent protein catabolic process(8.0880243337e-16);UV-damage excision repair(0.0189391906140591)	ubiquitin-dependent protein catabolic process
Q8IY92	SLX4	DNA repair	7.1798e-15	DNA catabolic process, endonucleolytic(0.089941881204014);DNA double-strand break processing involved in repair via single-strand annealing(0.00820648185008414);DNA repair(7.17980175390962e-15);DNA replication(4.36786219315558e-07);double-strand break repair via homologous recombination(1.30823451982617e-08);nucleotide-excision repair(3.14593488271296e-11);positive regulation of catalytic activit…
P54727	RAD23B	DNA repair	7.1798e-15	DNA repair(7.17980175390962e-15);nucleotide-excision repair(3.14593488271296e-11);nucleotide-excision repair, DNA damage recognition(0.00548603821606595);nucleotide-excision repair, DNA damage removal(3.21948839417254e-07);proteasomal ubiquitin-dependent protein catabolic process(1.56895749745146e-14);regulation of proteasomal ubiquitin-dependent protein catabolic process(0.000484562496746678);sp…
P23508	MCC	signal transduction	7.20572e-15	negative regulation of canonical Wnt receptor signaling pathway(5.22075319148641e-05);negative regulation of epithelial cell migration(0.0371568943273117);negative regulation of epithelial cell proliferation(0.000176588593525377);signal transduction(7.20572376729447e-15);Wnt receptor signaling pathway(2.06214952626837e-05)
Q9ULV4	CORO1C	signal transduction	7.20572e-15	actin cytoskeleton organization(0.0411159674983478);phagocytosis(0.0128352439445557);signal transduction(7.20572376729447e-15)
Q8IYT8	ULK2	signal transduction	7.20572e-15	autophagic vacuole assembly(1.92184497349828e-11);axon extension(0.00196080398285964);negative regulation of collateral sprouting(0.0215854071352867);protein autophosphorylation(1.31789450525137e-07);regulation of autophagy(2.71111722906627e-06);response to starvation(0.168334446479182);signal transduction(7.20572376729447e-15)
Q9BYV6	TRIM55	signal transduction	7.20572e-15	signal transduction(7.20572376729447e-15)
Q13576	IQGAP2	signal transduction	7.20572e-15	negative regulation of catalytic activity(1.16106775068415e-06);signal transduction(7.20572376729447e-15);small GTPase mediated signal transduction(6.72603498179059e-05)
Q04323	UBXN1	proteasomal ubiquitin-dependent protein catabolic process	1.56896e-14	negative regulation of proteasomal ubiquitin-dependent protein catabolic process(0.00123160566499979);negative regulation of protein ubiquitination(3.79089261853436e-06);proteasomal ubiquitin-dependent protein catabolic process(1.56895749745146e-14)
P46934	NEDD4	protein ubiquitination	1.80507e-14	adaptive immune response(0.0966371123880854);blood vessel morphogenesis(0.0831291724726004);cellular response to UV(6.9002151427879e-05);cytokine-mediated signaling pathway(8.0809712756812e-14);development involved in symbiotic interaction(0.00275056491261);endocardial cushion development(0.0595525409653865);glucocorticoid receptor signaling pathway(0.000111953336075735);lysosomal transport(0.021…
Q9UBE0	SAE1	protein ubiquitination	1.80507e-14	cellular protein metabolic process(7.74482560391506e-08);positive regulation of catalytic activity(4.20671221345357e-08);post-translational protein modification(2.51675143401972e-05);protein sumoylation(5.18941649820202e-10);protein ubiquitination(1.8050738961922e-14);regulation of mitotic cell cycle(0.000103780255730451);SMT3-dependent protein catabolic process(7.54580457702938e-06)
Q9BSL1	UBAC1	protein ubiquitination	1.80507e-14	protein ubiquitination(1.8050738961922e-14)
Q86VP6	CAND1	protein ubiquitination	1.80507e-14	cell differentiation(2.77793779890238e-05);negative regulation of catalytic activity(1.16106775068415e-06);positive regulation of RNA polymerase II transcriptional preinitiation complex assembly(0.0162782507566458);protein ubiquitination(1.8050738961922e-14);SCF complex assembly(0.00275056491261)
Q99959	PKP2	negative regulation of cell proliferation	4.11999e-14	adherens junction maintenance(0.00275056491261);bundle of His cell to Purkinje myocyte communication(0.000207837482733159);regulation of cardiac muscle cell action potential(0.00936391362752461);regulation of cardiac muscle cell action potential involved in contraction(0.0268339123440405);cell communication by electrical coupling involved in cardiac conduction(0.0189391906140591);cell-cell signal…
Q14978	NOLC1	mitosis	2.87145e-13	cell cycle(7.03739232831182e-08);mitosis(2.87144545142622e-13);nucleolus organization(0.0215854071352867);rRNA processing(1.21601906849948e-10)
Q96PY6	NEK1	mitosis	2.87145e-13	response to DNA damage stimulus(4.75418310877754e-13);cilium assembly(8.01723239720453e-05);mitosis(2.87144545142622e-13);response to ionizing radiation(7.96708845773677e-05)
Q92630	DYRK2	response to DNA damage stimulus	4.75418e-13	response to DNA damage stimulus(4.75418310877754e-13);intrinsic apoptotic signaling pathway in response to DNA damage by p53 class mediator(4.31544709376223e-05);negative regulation of NFAT protein import into nucleus(0.000332199048044635);peptidyl-tyrosine phosphorylation(1.69624186065062e-06);positive regulation of glycogen biosynthetic process(0.0667676385247506);protein phosphorylation(1.4805…
Q9H040	SPRTN	response to DNA damage stimulus	4.75418e-13	response to DNA damage stimulus(4.75418310877754e-13);positive regulation of protein ubiquitination(2.7969354515892e-12);response to UV(0.155588084091519);translesion synthesis(0.000332199048044635)
Q9P0N9	TBC1D7	positive regulation of protein ubiquitination	2.79694e-12	activation of Rho GTPase activity(0.00136470597123831);negative regulation of TOR signaling cascade(0.000377100516950694);positive regulation of protein ubiquitination(2.7969354515892e-12);response to growth factor stimulus(1.35126634195994e-05)
Q5S007	LRRK2	positive regulation of protein ubiquitination	2.79694e-12	activation of MAPK activity(4.09889172460732e-08);activation of MAPKK activity(1.91344197194e-11);autophagy(4.09825094665714e-07);cellular response to organic cyclic compound(0.000100017934699045);determination of adult lifespan(0.000521222396764809);exploration behavior(0.0571200249137145);GTP catabolic process(0.0182518751089744);intracellular distribution of mitochondria(0.0136025267425634);MA…
Q99759	MAP3K3	activation of MAPKK activity	1.91344e-11	activation of MAPKK activity(1.91344197194e-11);intracellular signal transduction(3.536816246406e-05);MAPK cascade(2.07308713416664e-11);positive regulation of I-kappaB kinase/NF-kappaB cascade(7.37641324985847e-11);protein autophosphorylation(1.31789450525137e-07)
Q9Y4P8	WIPI2	autophagic vacuole assembly	1.92184e-11	autophagic vacuole assembly(1.92184497349828e-11)
Q9H492	MAP1LC3A	autophagic vacuole assembly	1.92184e-11	autophagic vacuole assembly(1.92184497349828e-11);mitochondrion degradation(0.000664457509111089)
Q8TEW0	PARD3	transforming growth factor beta receptor signaling pathway	9.23061e-11	apical constriction(0.0215854071352867);asymmetric cell division(0.0136025267425634);axonogenesis(0.0113259617598769);cell cycle(7.03739232831182e-08);cell junction assembly(5.64315632785475e-05);cell-cell junction organization(0.0151247366567254);centrosome localization(0.00229629780897073);establishment of epithelial cell polarity(0.044748731997622);establishment or maintenance of cell polarity…
O60832	DKC1	rRNA processing	1.21602e-10	cell proliferation(1.66117760276388e-05);pseudouridine synthesis(0.0103580855346719);RNA processing(0.000141848696658695);rRNA processing(1.21601906849948e-10);telomere maintenance(1.13502021884241e-08);telomere maintenance via telomerase(1.82420746687242e-08)	rRNA processing
Q9H583	HEATR1	rRNA processing	1.21602e-10	rRNA processing(1.21601906849948e-10)	rRNA processing
Q9NY12	GAR1	rRNA processing	1.21602e-10	cation transport(0.122272339318659);pseudouridine synthesis(0.0103580855346719);rRNA processing(1.21601906849948e-10)	rRNA processing
P55854	SUMO3	protein sumoylation	5.18942e-10	cellular protein metabolic process(7.74482560391506e-08);post-translational protein modification(2.51675143401972e-05);protein sumoylation(5.18941649820202e-10)
Q9UBT2	UBA2	protein sumoylation	5.18942e-10	cellular protein metabolic process(7.74482560391506e-08);positive regulation of catalytic activity(4.20671221345357e-08);post-translational protein modification(2.51675143401972e-05);protein sumoylation(5.18941649820202e-10);SMT3-dependent protein catabolic process(7.54580457702938e-06)
Q9GZS1	POLR1E	transcription from RNA polymerase I promoter	6.24613e-10	rRNA transcription(0.000261202647521844);transcription from RNA polymerase I promoter(6.24612897354984e-10)
P49418	AMPH	endocytosis	1.40262e-09	endocytosis(1.40261929899212e-09);learning(0.00222233765437013);synaptic transmission(7.5849745605624e-06);synaptic vesicle endocytosis(0.00433095472916173)	endocytosis
Q15075	EEA1	endocytosis	1.40262e-09	early endosome to late endosome transport(0.00150423157410035);endocytosis(1.40261929899212e-09);synaptic vesicle to endosome fusion(0.00275056491261);vesicle fusion(0.0422323248909385)	endocytosis
Q8NC96	NECAP1	endocytosis	1.40262e-09	endocytosis(1.40261929899212e-09);protein transport(6.05535425371772e-09)	endocytosis
Q9UJ41	RABGEF1	endocytosis	1.40262e-09	endocytosis(1.40261929899212e-09);positive regulation of Rab GTPase activity(0.00344735157467774);protein transport(6.05535425371772e-09)	endocytosis
P62491	RAB11A	cytokinesis	4.89086e-09	cytokinesis(4.89086023194942e-09);melanosome transport(0.0028451190769006);neuron projection development(0.00228773706004704);plasma membrane to endosome transport(0.00548603821606595);positive regulation of axon extension(0.000228412473360855);protein localization to plasma membrane(0.0232804891229832);protein transport(6.05535425371772e-09);regulation of long-term neuronal synaptic plasticity(0…
Q9P2E9	RRBP1	protein transport	6.05535e-09	osteoblast differentiation(6.70648050014457e-05);protein transport(6.05535425371772e-09);translation(0.0138480569479162)
P60520	GABARAPL2	protein transport	6.05535e-09	autophagy(4.09825094665714e-07);intra-Golgi vesicle-mediated transport(0.00530367317660169);negative regulation of proteasomal protein catabolic process(0.00548603821606595);positive regulation of ATPase activity(0.0691453773324563);protein transport(6.05535425371772e-09)
Q15554	TERF2	telomere maintenance	1.13502e-08	age-dependent telomere shortening(7.54580457702938e-06);cell cycle(7.03739232831182e-08);cellular senescence(0.0595525409653865);in utero embryonic development(3.89958211142535e-08);negative regulation of telomere maintenance(0.0162782507566458);negative regulation of telomere maintenance via semi-conservative replication(7.54580457702938e-06);positive regulation of telomere maintenance(0.0109119…
Q9NUX5	POT1	telomere maintenance	1.13502e-08	DNA duplex unwinding(0.00456590741592145);negative regulation of telomerase activity(0.000664457509111089);negative regulation of telomere maintenance via telomerase(0.000111953336075735);positive regulation of DNA strand elongation(0.00275056491261);positive regulation of helicase activity(0.0162782507566458);positive regulation of telomerase activity(0.0136025267425634);positive regulation of t…
Q9NRI5	DISC1	protein localization	1.72242e-08	canonical Wnt receptor signaling pathway(4.34263217195152e-06);cell proliferation in forebrain(0.0667676385247506);cerebral cortex radially oriented cell migration(0.0546736716631625);microtubule cytoskeleton organization(1.79538051099349e-06);mitochondrial calcium ion homeostasis(0.0162782507566458);neuron migration(7.75224907972275e-06);positive regulation of neuroblast proliferation(0.00530367…
Q96Q42	ALS2	protein localization	1.72242e-08	behavioral fear response(0.0143451605018109);cell death(6.0225493817458e-07);endosomal transport(5.06560321910545e-06);endosome organization(0.0831291724726004);locomotory behavior(0.0148616919792626);neuromuscular junction development(3.63713684864621e-05);neuron projection morphogenesis(0.0290503972969728);positive regulation of protein kinase activity(0.000495141380265241);positive regulation …
O43150	ASAP2	positive regulation of catalytic activity	4.20671e-08	positive regulation of catalytic activity(4.20671221345357e-08);regulation of ARF GTPase activity(0.227068527672251)
Q02952	AKAP12	protein targeting	5.90923e-08	G-protein coupled receptor signaling pathway(0.206084457284713);positive regulation of cAMP biosynthetic process(0.00936391362752461);positive regulation of protein kinase A signaling cascade(0.0242169609192454);protein targeting(5.90922772503701e-08);regulation of protein kinase C signaling cascade(0.0268339123440405)
O95166	GABARAP	protein targeting	5.90923e-08	autophagy(4.09825094665714e-07);extrinsic apoptotic signaling pathway via death domain receptors(0.0128352439445557);microtubule cytoskeleton organization(1.79538051099349e-06);protein targeting(5.90922772503701e-08);synaptic transmission(7.5849745605624e-06)
Q16543	CDC37	protein targeting	5.90923e-08	protein targeting(5.90922772503701e-08);regulation of cyclin-dependent protein serine/threonine kinase activity(0.0384436191433975);regulation of interferon-gamma-mediated signaling pathway(1.35126634195994e-05);regulation of type I interferon-mediated signaling pathway(0.00247321476220094)
P33176	KIF5B	cellular protein metabolic process	7.74483e-08	cellular protein metabolic process(7.74482560391506e-08);cytoplasm organization(0.0189391906140591);microtubule-based movement(0.00258019997060106);positive regulation of establishment of protein localization to plasma membrane(0.0571200249137145);positive regulation of potassium ion transport(0.0472510119104727);regulation of membrane potential(0.0017394527511977);stress granule disassembly(0.00…
Q13885	TUBB2A	cellular protein metabolic process	7.74483e-08	_de novo_ posttranslational protein folding(0.0966371123880854);cellular protein metabolic process(7.74482560391506e-08);microtubule-based process(0.0598110132034223);protein folding(0.0358543022982865);protein polymerization(0.21993415990072)
Q92597	NDRG1	cellular response to hypoxia	9.97091e-08	cell death(6.0225493817458e-07);cellular response to hypoxia(9.9709061322379e-08);DNA damage response, signal transduction by p53 class mediator(3.94579000810524e-05);mast cell activation(0.0422323248909385);peripheral nervous system myelin maintenance(0.089941881204014);positive regulation of spindle checkpoint(0.00275056491261);response to metal ion(0.0320242485290104)
Q9H0R8	GABARAPL1	autophagy	4.09825e-07	autophagy(4.09825094665714e-07)
Q9GZQ8	MAP1LC3B	autophagy	4.09825e-07	autophagy(4.09825094665714e-07)
Q9P2P5	HECW2	protein ubiquitination involved in ubiquitin-dependent protein catabolic process	6.62919e-07	protein ubiquitination involved in ubiquitin-dependent protein catabolic process(6.62919372494127e-07)
O60271	SPAG9	positive regulation of cell migration	7.16118e-07	activation of JUN kinase activity(0.0075035875014012);muscle cell differentiation(0.000521222396764809);negative regulation of protein homodimerization activity(0.0109119575290057);positive regulation of cell migration(7.16118431115361e-07);positive regulation of muscle cell differentiation(5.65572623953842e-05);positive regulation of neuron differentiation(0.00185142570453455);protein homooligom…
Q9Y6J0	CABIN1	negative regulation of catalytic activity	1.16107e-06	cell surface receptor signaling pathway(5.13629142650821e-05);chromatin modification(0.00459958676380952);DNA replication-independent nucleosome assembly(0.000484562496746678);negative regulation of catalytic activity(1.16106775068415e-06)
P11171	EPB41	positive regulation of protein binding	1.25129e-06	actin cytoskeleton organization(0.0411159674983478);blood circulation(0.128401851970517);cortical actin cytoskeleton organization(0.118124801981616);positive regulation of protein binding(1.2512947737039e-06)
P42858	HTT	response to calcium ion	1.28799e-06	anterior/posterior pattern specification(0.00576268434102646);axon cargo transport(3.94579000810524e-05);cell aging(0.000104495333951889);citrulline metabolic process(0.0242169609192454);determination of adult lifespan(0.000521222396764809);dopamine receptor signaling pathway(0.0715095636734823);endoplasmic reticulum organization(0.089941881204014);endosomal transport(5.06560321910545e-06);ER to …
P68133	ACTA1	muscle contraction	1.7735e-06	cell growth(0.233966984349584);muscle contraction(1.77349924224367e-06);muscle filament sliding(3.79089261853436e-06);response to extracellular stimulus(0.0109119575290057);response to lithium ion(2.61418293659446e-05);response to mechanical stimulus(0.043983036883097);response to steroid hormone stimulus(0.103216331924549);skeletal muscle fiber adaptation(0.00548603821606595);skeletal muscle fib…
Q13424	SNTA1	muscle contraction	1.7735e-06	muscle contraction(1.77349924224367e-06);negative regulation of peptidyl-cysteine S-nitrosylation(0.0096906708152496);neuromuscular junction development(3.63713684864621e-05);regulation of heart rate(0.00228776148605779);regulation of sodium ion transmembrane transport(0.0189391906140591);regulation of vasoconstriction by circulating norepinephrine(0.00548603821606595);regulation of ventricular c…
Q05682	CALD1	muscle contraction	1.7735e-06	cellular component movement(0.00421108156341786);muscle contraction(1.77349924224367e-06)
O43237	DYNC1LI2	microtubule cytoskeleton organization	1.79538e-06	antigen processing and presentation of exogenous peptide antigen via MHC class II(1.41073868646436e-05);centrosome localization(0.00229629780897073);microtubule cytoskeleton organization(1.79538051099349e-06);microtubule-based movement(0.00258019997060106);transport(0.00464941054385742)
P17655	CAPN2	response to hypoxia	2.12521e-06	blastocyst development(3.40111052385723e-06);cellular response to amino acid stimulus(0.0196888137863819);myoblast fusion(4.47161414598453e-05);protein autoprocessing(0.0320242485290104);proteolysis(9.1788991332915e-05);proteolysis involved in cellular protein catabolic process(0.0128352439445557);regulation of cytoskeleton organization(1.9150582342875e-05);response to hypoxia(2.12521317151326e-0…
Q02809	PLOD1	response to hypoxia	2.12521e-06	cellular protein modification process(0.013209084409749);epidermis development(0.0256316604747293);extracellular matrix organization(2.73261046410737e-06);hydroxylysine biosynthetic process(0.00275056491261);oxidation-reduction process(0.0690081111505472);response to hypoxia(2.12521317151326e-06)
P11532	DMD	extracellular matrix organization	2.73261e-06	regulation of cardiac muscle cell action potential(0.00936391362752461);cardiac muscle contraction(0.0196888137863819);cellular protein complex assembly(0.0167314336954609);cellular protein localization(0.0610237764586075);extracellular matrix organization(2.73261046410737e-06);motile cilium assembly(0.0215854071352867);muscle filament sliding(3.79089261853436e-06);muscle organ development(0.0190…
Q14324	MYBPC2	muscle filament sliding	3.79089e-06	cell adhesion(0.000430665088206722);muscle filament sliding(3.79089261853436e-06)
Q6DKJ4	NXN	negative regulation of protein ubiquitination	3.79089e-06	cardiovascular system development(0.0371568943273117);cell differentiation(2.77793779890238e-05);negative regulation of protein ubiquitination(3.79089261853436e-06);negative regulation of Wnt receptor signaling pathway(0.0214575564830677);Wnt receptor signaling pathway(2.06214952626837e-05)
P27816	MAP4	mitotic spindle organization	1.91506e-05	cell division(0.0758751131487269);establishment of spindle orientation(0.00548603821606595);microtubule sliding(0.00275056491261);mitotic spindle organization(1.9150582342875e-05)
Q15758	SLC1A5	transmembrane transport	2.19758e-05	amino acid transport(0.0944183309006318);extracellular amino acid transport(0.00548603821606595);glutamine transport(0.00820648185008414);ion transport(0.305205842077566);neutral amino acid transport(0.0242169609192454);transmembrane transport(2.19757934340152e-05)
Q3T906	GNPTAB	cell differentiation	2.77794e-05	carbohydrate phosphorylation(0.0619712771827633);cell differentiation(2.77793779890238e-05);lysosome organization(0.000445484085336942);protein secretion(0.00324076121800593)
Q16626	MEA1	cell differentiation	2.77794e-05	cell differentiation(2.77793779890238e-05);male gonad development(0.0739940524075591);spermatogenesis(0.00103684080801651)
Q15051	IQCB1	maintenance of organ identity	7.48403e-05	cilium assembly(8.01723239720453e-05);maintenance of organ identity(7.48403373875046e-05);photoreceptor cell maintenance(0.0921866052699077)
Q8TDR0	TRAF3IP1	cilium assembly	8.01723e-05	cilium assembly(8.01723239720453e-05);intraflagellar transport(0.0522134236386405)
Q9Y244	POMP	proteasome assembly	0.000111953	proteasome assembly(0.000111953336075735)
Q96JB2	COG3	protein stabilization	0.000243639	ER to Golgi vesicle-mediated transport(0.000565484216843169);intra-Golgi vesicle-mediated transport(0.00530367317660169);intracellular protein transport(0.0429159115730439);protein glycosylation(0.127077460673911);protein localization to organelle(0.00303999947332981);protein stabilization(0.000243638546158053);retrograde vesicle-mediated transport, Golgi to ER(0.00480637846655642)
P13646	KRT13	tongue morphogenesis	0.000266488	cellular response to retinoic acid(0.00242204328386331);cytoskeleton organization(0.0696286988986054);response to radiation(0.00456590741592145);tongue morphogenesis(0.000266488431808332)
Q8TAT6	NPLOC4	ER-associated protein catabolic process	0.000296851	ER-associated protein catabolic process(0.000296850519068741);Golgi organization(0.0132064615252552);membrane fusion(0.0761975040404053)
Q8IWJ2	GCC2	microtubule organizing center organization	0.000332199	Golgi ribbon formation(0.00820648185008414);late endosome to Golgi transport(0.00548603821606595);microtubule anchoring(0.00780147726518649);microtubule organizing center organization(0.000332199048044635);protein localization to Golgi apparatus(0.0472510119104727);protein targeting to Golgi(0.0921866052699077);protein targeting to lysosome(0.000332199048044635);recycling endosome to Golgi transp…
O75436	VPS26A	retrograde transport, endosome to Golgi	0.000399096	retrograde transport, endosome to Golgi(0.000399095824835765)
P24386	CHM	protein targeting to membrane	0.00123161	blood vessel development(0.0237444032165461);protein geranylgeranylation(0.0345977529480911);protein targeting to membrane(0.00123160566499979);response to stimulus(0.122272339318659);visual perception(0.11204592643559)
P20810	CAST	negative regulation of endopeptidase activity	0.00203287	negative regulation of endopeptidase activity(0.00203287216569141);negative regulation of type B pancreatic cell apoptotic process(0.0162782507566458)
Q16643	DBN1	regulation of neuronal synaptic plasticity	0.00324076	actin filament organization(0.041187679000422);cell communication by chemical coupling(0.00820648185008414);cell communication by electrical coupling(0.00820648185008414);maintenance of protein location in cell(0.0109119575290057);neural precursor cell proliferation(0.0472510119104727);regulation of dendrite development(0.0320242485290104);regulation of neuronal synaptic plasticity(0.003240761218…
P61626	LYZ	inflammatory response	0.00397962	cell wall macromolecule catabolic process(0.044748731997622);cytolysis(0.0667676385247506);defense response to bacterium(0.275006232016794);inflammatory response(0.00397962465528234);retina homeostasis(0.00556039630982614)
Q5U5Q3	MEX3C	chondrocyte hypertrophy	0.010912	chondrocyte hypertrophy(0.0109119575290057);energy homeostasis(0.0162782507566458);regulation of fat cell differentiation(0.044748731997622)
O95793	STAU1	intracellular mRNA localization	0.0136025	intracellular mRNA localization(0.0136025267425634)
Q14692	BMS1	ribosome assembly	0.024217	ribosome assembly(0.0242169609192454)
Q9Y5X3	SNX5	pinocytosis	0.0345978	intracellular protein transport(0.0429159115730439);pinocytosis(0.0345977529480911)
Q7RTS7	KRT74	intermediate filament cytoskeleton organization	0.0422323	intermediate filament cytoskeleton organization(0.0422323248909385)
O43396	TXNL1	glycerol ether metabolic process	0.0595525	cell redox homeostasis(0.319031092636684);glycerol ether metabolic process(0.0595525409653865)

## Sheet: Table S6
Table S6. Node attributes from human NEK1 network with cisplatin. Enriched GO Biological Processes (Enriched BP) are depicted with a p-value in parentheses for each protein in the network. The selected most relevant GO biological processes (Selected BP) from the ones with the lowest p-values for each protein in the network (Top Enriched BP) are also depicted. Only enriched terms with p ≤ 0.05 wer…
UniProt ID	Gene	Top Enriched BP	p-value (Top Enriched BP)	Enriched BP	Selected BP
Q8WUY3	PRUNE2	apoptotic process	6.20868e-29	apoptotic process(6.20868145303765e-29)	apoptotic process
Q13188	STK3	apoptotic process	6.20868e-29	apoptotic process(6.20868145303765e-29);hippo signaling cascade(0.00531220991814202);intracellular signal transduction(1.18532510341831e-07);negative regulation of canonical Wnt receptor signaling pathway(5.76624926906474e-09);positive regulation of apoptotic process(5.21652554413277e-14);positive regulation of protein serine/threonine kinase activity(5.55714470524501e-07);protein phosphorylation…	apoptotic process
P15924	DSP	apoptotic process	6.20868e-29	adherens junction organization(0.000431026079451173);apoptotic process(6.20868145303765e-29);bundle of His cell to Purkinje myocyte communication(0.000188786106194757);cellular component disassembly involved in execution phase of apoptosis(5.3068071145172e-11);desmosome organization(0.0155193070570038);epidermis development(0.0235445906435568);intermediate filament organization(1.65905984321207e-…	apoptotic process
P34947	GRK5	apoptotic process	6.20868e-29	adenylate cyclase-modulating G-protein coupled receptor signaling pathway(0.0104192874510317);apoptotic process(6.20868145303765e-29);negative regulation of apoptotic process(6.38379917804347e-27);protein autophosphorylation(1.32302450040773e-16);regulation of G-protein coupled receptor protein signaling pathway(0.145901352025945);tachykinin receptor signaling pathway(0.0255961678657793);terminat…	apoptotic process
Q99933	BAG1	apoptotic process	6.20868e-29	apoptotic process(6.20868145303765e-29);cell surface receptor signaling pathway(3.37526756500795e-06);chaperone cofactor-dependent protein refolding(1.47611601418624e-06);intracellular signal transduction(1.18532510341831e-07);negative regulation of apoptotic process(6.38379917804347e-27)	apoptotic process
Q00005	PPP2R2B	apoptotic process	6.20868e-29	apoptotic process(6.20868145303765e-29);regulation of catalytic activity(1.73127306599629e-06);signal transduction(8.17716673985846e-23)	apoptotic process
P25054	APC	apoptotic process	6.20868e-29	anterior/posterior pattern specification(0.00491092752748397);apoptotic process(6.20868145303765e-29);axis specification(0.0378951269751526);axonogenesis(0.0100135670610862);canonical Wnt receptor signaling pathway(8.33462102939171e-09);canonical Wnt receptor signaling pathway involved in negative regulation of apoptotic process(0.00136866310138866);canonical Wnt receptor signaling pathway involv…	apoptotic process
P21127	CDK11B	apoptotic process	6.20868e-29	apoptotic process(6.20868145303765e-29);cell proliferation(1.02939847411671e-13);mitosis(1.11596833748797e-08);protein phosphorylation(9.01895206468935e-29);regulation of cell growth(0.04593373309636);regulation of mRNA processing(0.000301826744555431);regulation of transcription, DNA-dependent(7.13178442512193e-09)	apoptotic process
O00141	SGK1	apoptotic process	6.20868e-29	apoptotic process(6.20868145303765e-29);response to DNA damage stimulus(5.0658836451137e-25);ion transmembrane transport(0.0693176041689006);long-term memory(0.142222842658574);positive regulation of transporter activity(6.79535459692191e-05);protein phosphorylation(9.01895206468935e-29);regulation of apoptotic process(9.05915522552894e-08);regulation of blood pressure(0.216706403020897);regulati…	apoptotic process
Q9Y6E0	STK24	apoptotic process	6.20868e-29	apoptotic process(6.20868145303765e-29);cellular component disassembly involved in execution phase of apoptosis(5.3068071145172e-11);execution phase of apoptosis(0.0728724889625222);intrinsic apoptotic signaling pathway in response to oxidative stress(0.0728724889625222);negative regulation of cell migration(0.00440064447867089);protein autophosphorylation(1.32302450040773e-16);protein phosphoryl…	apoptotic process
P35579	MYH9	ATP catabolic process	2.44092e-19	actin cytoskeleton reorganization(0.0217996320682161);actin filament-based movement(0.0569019262970461);actomyosin structure organization(0.0925286471275805);angiogenesis(6.81198707605859e-06);ATP catabolic process(2.44091793317933e-19);axon guidance(3.52633299960683e-18);blood vessel endothelial cell migration(0.00060402222098122);cytokinesis(7.96247254881389e-05);establishment of meiotic spindl…	ATP catabolic process
Q13838	DDX39B	ATP catabolic process	2.44092e-19	ATP catabolic process(2.44091793317933e-19);mRNA export from nucleus(6.94421751199706e-05);mRNA splicing, via spliceosome(5.11897548560515e-10);negative regulation of DNA damage checkpoint(4.08786677550862e-05);positive regulation of DNA-dependent transcription, elongation(0.0305550559668063);RNA secondary structure unwinding(0.00782081185832598);RNA splicing(1.20809045844932e-12);spliceosomal co…	ATP catabolic process
P12883	MYH7	ATP catabolic process	2.44092e-19	adult heart development(0.00314115963291827);ATP catabolic process(2.44091793317933e-19);muscle contraction(1.34550277420481e-06);muscle filament sliding(5.54108300643339e-08);regulation of heart rate(5.80678875719362e-06);regulation of the force of heart contraction(0.0860843942380005);striated muscle contraction(0.00136866310138866);ventricular cardiac muscle tissue morphogenesis(0.000309563725…	ATP catabolic process
O00567	NOP56	cell death	1.13064e-14	cell death(1.13064262395802e-14);rRNA processing(0.0405865135872465)	cell death
Q96Q42	ALS2	cell death	1.13064e-14	behavioral fear response(0.14953754991663);cell death(1.13064262395802e-14);endosomal transport(0.00162044967581886);endosome organization(0.0795327711089196);locomotory behavior(0.00165004704281193);neuromuscular junction development(9.89024964962441e-07);neuron projection morphogenesis(0.0267093220540171);positive regulation of protein kinase activity(0.000431026079451173);positive regulation o…	cell death
O94830	DDHD2	cell death	1.13064e-14	cell death(1.13064262395802e-14);lipid catabolic process(0.256115429342303)	cell death
Q13148	TARDBP	cell death	1.13064e-14	3_-UTR-mediated mRNA stabilization(3.83595137208782e-06);cell death(1.13064262395802e-14);mRNA processing(8.48219294426296e-05);negative regulation by host of viral transcription(3.83595137208782e-06);RNA splicing(1.20809045844932e-12);transcription from RNA polymerase II promoter(9.4019567037763e-13)	cell death
P61956	SUMO2	cellular protein metabolic process	1.81025e-21	cellular protein metabolic process(1.8102536298093e-21);positive regulation of proteasomal ubiquitin-dependent protein catabolic process(2.56451552049172e-13);post-translational protein modification(0.0154706553972904);protein sumoylation(3.10371899770488e-08)	cellular protein metabolic process
P55854	SUMO3	cellular protein metabolic process	1.81025e-21	cellular protein metabolic process(1.8102536298093e-21);post-translational protein modification(0.0154706553972904);protein sumoylation(3.10371899770488e-08)	cellular protein metabolic process
Q86TM6	SYVN1	cellular protein metabolic process	1.81025e-21	activation of signaling protein activity involved in unfolded protein response(2.00596751419615e-08);cellular protein metabolic process(1.8102536298093e-21);endoplasmic reticulum unfolded protein response(4.14435264394125e-10);ER-associated protein catabolic process(7.40064527234243e-06);in utero embryonic development(2.29221326506903e-13);negative regulation of intrinsic apoptotic signaling path…	cellular protein metabolic process
P24928	POLR2A	viral process	1.74614e-75	7-methylguanosine mRNA capping(0.0839125132534385);DNA repair(3.4536114503015e-33);gene expression(1.21326468500975e-52);mRNA splicing, via spliceosome(5.11897548560515e-10);nucleotide-excision repair(1.18343327420506e-08);positive regulation of viral transcription(0.00580625177456105);regulation of transcription, DNA-dependent(7.13178442512193e-09);RNA splicing(1.20809045844932e-12);transcriptio…	DNA repair
P0CG48	UBC	viral process	1.74614e-75	activation of MAPK activity(2.83492240287087e-08);anaphase-promoting complex-dependent proteasomal ubiquitin-dependent protein catabolic process(2.85270362492756e-06);antigen processing and presentation of exogenous peptide antigen via MHC class I(0.0497756887255737);antigen processing and presentation of exogenous peptide antigen via MHC class I, TAP-dependent(0.0470236204726585);antigen process…	DNA repair
P06748	NPM1	viral process	1.74614e-75	cell aging(0.00156991050338353);CENP-A containing nucleosome assembly at centromere(0.0638208346501513);centrosome cycle(0.00241899183946171);DNA repair(3.4536114503015e-33);intracellular protein transport(0.00353265527170751);negative regulation of apoptotic process(6.38379917804347e-27);negative regulation of cell proliferation(8.95519611518238e-18);negative regulation of centrosome duplication…	DNA repair
P13010	XRCC5	viral process	1.74614e-75	brain development(0.00199477448039431);cell proliferation(1.02939847411671e-13);cellular hyperosmotic salinity response(0.0155193070570038);cellular response to fatty acid(4.37118396304699e-05);cellular response to X-ray(0.0305550559668063);DNA duplex unwinding(7.63356962342149e-12);DNA recombination(4.46112951807165e-08);DNA repair(3.4536114503015e-33);double-strand break repair(2.67919371686319…	DNA repair
P49917	LIG4	viral process	1.74614e-75	cell cycle(4.18320209027088e-07);cell division(3.36382281384105e-08);cell proliferation(1.02939847411671e-13);cellular response to lithium ion(0.100956166277068);central nervous system development(0.00794516346644414);chromosome organization(0.00142410981896306);DNA ligation(0.0155193070570038);DNA ligation involved in DNA recombination(0.00262061696398276);DNA ligation involved in DNA repair(0.0…	DNA repair
P52701	MSH6	DNA repair	3.45361e-33	ATP catabolic process(2.44091793317933e-19);determination of adult lifespan(1.59695783475818e-05);DNA repair(3.4536114503015e-33);intrinsic apoptotic signaling pathway(3.74921230902076e-19);intrinsic apoptotic signaling pathway in response to DNA damage(3.17321235352788e-08);isotype switching(4.70482466718779e-06);meiotic mismatch repair(2.04927427758645e-05);mismatch repair(1.7458248363366e-06);…	DNA repair
P55072	VCP	DNA repair	3.45361e-33	activation of cysteine-type endopeptidase activity involved in apoptotic process(0.00298884821132576);aggresome assembly(9.66311763934197e-06);response to DNA damage stimulus(5.0658836451137e-25);DNA repair(3.4536114503015e-33);double-strand break repair(2.67919371686319e-16);endoplasmic reticulum unfolded protein response(4.14435264394125e-10);ER to Golgi vesicle-mediated transport(0.00538217663…	DNA repair
Q8IY92	SLX4	DNA repair	3.45361e-33	DNA catabolic process, endonucleolytic(0.000116955224663796);DNA double-strand break processing involved in repair via single-strand annealing(0.00782081185832598);DNA repair(3.4536114503015e-33);DNA replication(3.14475732442198e-06);double-strand break repair via homologous recombination(1.67395361281385e-13);nucleotide-excision repair(1.18343327420506e-08);positive regulation of catalytic activ…	DNA repair
O60934	NBN	DNA repair	3.45361e-33	blastocyst growth(0.000188786106194757);cell cycle arrest(7.01011535612657e-18);cell proliferation(1.02939847411671e-13);DNA damage checkpoint(3.5838248499552e-05);DNA damage response, signal transduction by p53 class mediator(3.42055840739332e-05);DNA duplex unwinding(7.63356962342149e-12);DNA repair(3.4536114503015e-33);double-strand break repair(2.67919371686319e-16);double-strand break repair…	DNA repair
Q92878	RAD50	DNA repair	3.45361e-33	response to DNA damage stimulus(5.0658836451137e-25);DNA catabolic process, endonucleolytic(0.000116955224663796);DNA duplex unwinding(7.63356962342149e-12);DNA recombination(4.46112951807165e-08);DNA repair(3.4536114503015e-33);double-strand break repair(2.67919371686319e-16);double-strand break repair via homologous recombination(1.67395361281385e-13);nucleic acid phosphodiester bond hydrolysis…	DNA repair
Q13315	ATM	DNA repair	3.45361e-33	brain development(0.00199477448039431);cell cycle arrest(7.01011535612657e-18);response to DNA damage stimulus(5.0658836451137e-25);cellular response to gamma radiation(0.00150160513849754);DNA damage induced protein phosphorylation(0.00060402222098122);DNA damage response, signal transduction by p53 class mediator resulting in cell cycle arrest(5.24172725141178e-06);DNA repair(3.4536114503015e-3…	DNA repair
Q6ZW49	PAXIP1	DNA repair	3.45361e-33	adipose tissue development(0.0882443453067088);chorion development(0.000242092372530036);DNA damage response, signal transduction by p53 class mediator(3.42055840739332e-05);DNA recombination(4.46112951807165e-08);DNA repair(3.4536114503015e-33);endothelial cell migration(0.00712432188048649);histone H3-K4 methylation(1.94676167438077e-05);positive regulation of histone acetylation(0.001368663101…	DNA repair
P54132	BLM	DNA repair	3.45361e-33	alpha-beta T cell differentiation(0.0475006209375881);ATP catabolic process(2.44091793317933e-19);cellular response to camptothecin(0.00782081185832598);response to DNA damage stimulus(5.0658836451137e-25);cellular response to hydroxyurea(2.04927427758645e-05);cellular response to ionizing radiation(1.0647586500643e-06);DNA double-strand break processing(0.00010166466077878);DNA duplex unwinding(…	DNA repair
Q99728	BARD1	DNA repair	3.45361e-33	cell cycle arrest(7.01011535612657e-18);response to DNA damage stimulus(5.0658836451137e-25);DNA repair(3.4536114503015e-33);negative regulation of apoptotic process(6.38379917804347e-27);negative regulation of mRNA 3_-end processing(0.00262061696398276);negative regulation of protein export from nucleus(0.0205843906855511);positive regulation of apoptotic process(5.21652554413277e-14);positive r…	DNA repair
Q14676	MDC1	DNA repair	3.45361e-33	DNA repair(3.4536114503015e-33);double-strand break repair(2.67919371686319e-16);double-strand break repair via homologous recombination(1.67395361281385e-13);intra-S DNA damage checkpoint(3.00078882870502e-05)	DNA repair
O15360	FANCA	DNA repair	3.45361e-33	DNA repair(3.4536114503015e-33);female gonad development(0.0860843942380005);male gonad development(0.0106090184247005);male meiosis(0.100956166277068);protein complex assembly(1.99720318323258e-19);regulation of cell proliferation(0.000265792634122116)	DNA repair
P43246	MSH2	DNA repair	3.45361e-33	ATP catabolic process(2.44091793317933e-19);B cell differentiation(1.95513861904582e-08);B cell mediated immunity(0.0155193070570038);cell cycle arrest(7.01011535612657e-18);determination of adult lifespan(1.59695783475818e-05);DNA repair(3.4536114503015e-33);double-strand break repair(2.67919371686319e-16);germ cell development(0.00147174633167313);in utero embryonic development(2.29221326506903…	DNA repair
Q00597	FANCC	DNA repair	3.45361e-33	DNA repair(3.4536114503015e-33);germ cell development(0.00147174633167313);myeloid cell homeostasis(0.0569019262970461);nucleotide-excision repair(1.18343327420506e-08);protein complex assembly(1.99720318323258e-19);removal of superoxide radicals(0.0330147962489278)	DNA repair
Q13535	ATR	DNA repair	3.45361e-33	cell cycle(4.18320209027088e-07);response to DNA damage stimulus(5.0658836451137e-25);cellular response to gamma radiation(0.00150160513849754);cellular response to UV(5.73710976086389e-05);DNA damage checkpoint(3.5838248499552e-05);DNA repair(3.4536114503015e-33);DNA replication(3.14475732442198e-06);multicellular organismal development(0.0811392929443881);negative regulation of DNA replication(…	DNA repair
Q9NRD1	FBXO6	DNA repair	3.45361e-33	DNA damage checkpoint(3.5838248499552e-05);DNA repair(3.4536114503015e-33);ER-associated protein catabolic process(7.40064527234243e-06);glycoprotein catabolic process(0.0305550559668063);proteolysis(0.000632350013871817);response to unfolded protein(4.98296183507136e-09);SCF-dependent proteasomal ubiquitin-dependent protein catabolic process(0.00178478466817601)	DNA repair
O60749	SNX2	endocytosis	2.35015e-07	endocytosis(2.35015103181893e-07);intracellular protein transport(0.00353265527170751)	endocytosis
Q5T1M5	FKBP15	endocytosis	2.35015e-07	endocytosis(2.35015103181893e-07);negative regulation of phosphatase activity(0.121219269425645);protein folding(4.77051242052237e-05)	endocytosis
A0FGR8	ESYT2	endocytosis	2.35015e-07	endocytosis(2.35015103181893e-07);lipid transport(0.277516209041647)	endocytosis
Q8NC96	NECAP1	endocytosis	2.35015e-07	endocytosis(2.35015103181893e-07);protein transport(1.58809262028809e-06)	endocytosis
Q96B97	SH3KBP1	epidermal growth factor receptor signaling pathway	4.99283e-32	apoptotic process(6.20868145303765e-29);cell migration(4.9656341518485e-08);cell-cell signaling(0.00509591743305114);cytoskeleton organization(0.00957907741578082);endocytosis(2.35015103181893e-07);epidermal growth factor receptor signaling pathway(4.99283404871122e-32);negative regulation of epidermal growth factor receptor signaling pathway(4.54458165401937e-11);regulation of cell shape(2.08791…	epidermal growth factor receptor signaling pathway
P42566	EPS15	epidermal growth factor receptor signaling pathway	4.99283e-32	cell proliferation(1.02939847411671e-13);clathrin coat assembly(0.103033925875392);endocytic recycling(0.0498699641023482);endocytosis(2.35015103181893e-07);epidermal growth factor receptor signaling pathway(4.99283404871122e-32);Golgi to endosome transport(0.0378951269751526);negative regulation of epidermal growth factor receptor signaling pathway(4.54458165401937e-11);protein transport(1.58809…	epidermal growth factor receptor signaling pathway
Q96RT1	ERBB2IP	epidermal growth factor receptor signaling pathway	4.99283e-32	basal protein localization(0.00522753640073456);cell adhesion(3.46815610785096e-07);cell cycle(4.18320209027088e-07);cell growth(0.226309678509894);epidermal growth factor receptor signaling pathway(4.99283404871122e-32);establishment or maintenance of epithelial cell apical/basal polarity(0.0280821970788472);integrin-mediated signaling pathway(9.18954049734859e-06);intermediate filament cytoskel…	epidermal growth factor receptor signaling pathway
Q14289	PTK2B	epidermal growth factor receptor signaling pathway	4.99283e-32	activation of Janus kinase activity(0.0129666441010961);activation of Rac GTPase activity(0.00079236608655501);apoptotic process(6.20868145303765e-29);blood vessel endothelial cell migration(0.00060402222098122);bone resorption(3.04727341385537e-07);cell surface receptor signaling pathway(3.37526756500795e-06);cellular defense response(0.0107443964564533);cellular response to retinoic acid(0.0253…	epidermal growth factor receptor signaling pathway
Q9H9G7	AGO3	gene expression	1.21326e-52	epidermal growth factor receptor signaling pathway(4.99283404871122e-32);Fc-epsilon receptor signaling pathway(6.57853277604391e-23);fibroblast growth factor receptor signaling pathway(2.38981765792983e-22);gene expression(1.21326468500975e-52);innate immune response(1.88358495767701e-52);mRNA catabolic process(0.00100500712592956);negative regulation of translation involved in gene silencing by …	gene expression
P84022	SMAD3	gene expression	1.21326e-52	activation of cysteine-type endopeptidase activity involved in apoptotic process(0.00298884821132576);activation of cysteine-type endopeptidase activity involved in apoptotic signaling pathway(0.0330147962489278);activin receptor signaling pathway(0.00069513216029301);cell cycle arrest(7.01011535612657e-18);cell-cell junction organization(0.0138497947873546);developmental growth(0.000723858487920…	gene expression
Q13485	SMAD4	gene expression	1.21326e-52	atrioventricular canal development(0.0403158199619554);atrioventricular valve formation(0.0205843906855511);axon guidance(3.52633299960683e-18);BMP signaling pathway(0.0253362137784826);brainstem development(0.054570566745914);branching involved in ureteric bud morphogenesis(0.00194443056457568);cardiac septum development(0.0255961678657793);cell proliferation(1.02939847411671e-13);developmental …	gene expression
P63104	YWHAZ	gene expression	1.21326e-52	apoptotic process(6.20868145303765e-29);blood coagulation(5.83358329341457e-34);gene expression(1.21326468500975e-52);histamine secretion by mast cell(0.00112031550572737);intrinsic apoptotic signaling pathway(3.74921230902076e-19);membrane organization(3.097855853152e-13);mRNA metabolic process(2.06929902261014e-21);negative regulation of apoptotic process(6.38379917804347e-27);platelet activati…	gene expression
P01106	MYC	gene expression	1.21326e-52	branching involved in ureteric bud morphogenesis(0.00194443056457568);canonical Wnt receptor signaling pathway(8.33462102939171e-09);cell cycle arrest(7.01011535612657e-18);cellular iron ion homeostasis(0.0486702942836897);response to DNA damage stimulus(5.0658836451137e-25);cellular response to drug(0.020522794414195);cellular response to UV(5.73710976086389e-05);chromatin remodeling(1.983350073…	gene expression
P08107	HSPA1A	gene expression	1.21326e-52	ATP catabolic process(2.44091793317933e-19);cellular heat acclimation(0.00522753640073456);cellular response to heat(0.000274600187003535);gene expression(1.21326468500975e-52);mRNA catabolic process(0.00100500712592956);mRNA metabolic process(2.06929902261014e-21);negative regulation of apoptotic process(6.38379917804347e-27);negative regulation of cell death(3.78793669709952e-05);negative regul…	gene expression
Q14152	EIF3A	gene expression	1.21326e-52	cellular protein metabolic process(1.8102536298093e-21);formation of translation initiation complex(0.0230969164281125);formation of translation preinitiation complex(5.61839031841332e-09);gene expression(1.21326468500975e-52);regulation of translational initiation(5.67078362294041e-08);translation(2.34266438951282e-15);translational initiation(2.18850229049269e-26)	gene expression
O75821	EIF3G	gene expression	1.21326e-52	cellular protein metabolic process(1.8102536298093e-21);formation of translation preinitiation complex(5.61839031841332e-09);gene expression(1.21326468500975e-52);regulation of translational initiation(5.67078362294041e-08);translation(2.34266438951282e-15);translational initiation(2.18850229049269e-26)	gene expression
P19793	RXRA	gene expression	1.21326e-52	cardiac muscle cell proliferation(0.00416307788225019);cellular lipid metabolic process(0.000102616511388032);cholesterol metabolic process(0.0344221416410849);embryo implantation(0.211025208677217);gene expression(1.21326468500975e-52);in utero embryonic development(2.29221326506903e-13);maternal placenta development(0.0661022454315416);modulation by virus of host morphology or physiology(0.0305…	gene expression
Q92731	ESR2	gene expression	1.21326e-52	brain development(0.00199477448039431);cell-cell signaling(0.00509591743305114);epithelial cell maturation involved in prostate gland development(0.0180585383764059);extracellular negative regulation of signal transduction(0.0180585383764059);gene expression(1.21326468500975e-52);hormone-mediated apoptotic signaling pathway(0.0180585383764059);intracellular estrogen receptor signaling pathway(0.0…	gene expression
P67809	YBX1	gene expression	1.21326e-52	CRD-mediated mRNA stabilization(6.79535459692191e-05);gene expression(1.21326468500975e-52);in utero embryonic development(2.29221326506903e-13);mRNA splicing, via spliceosome(5.11897548560515e-10);negative regulation of striated muscle cell differentiation(0.0262488832802773);negative regulation of transcription from RNA polymerase II promoter(1.47266232322172e-44);positive regulation of cell di…	gene expression
P41252	IARS	gene expression	1.21326e-52	gene expression(1.21326468500975e-52);isoleucyl-tRNA aminoacylation(0.0255961678657793);osteoblast differentiation(5.36058901072047e-05);tRNA aminoacylation for protein translation(0.0231038952308714)	gene expression
P61326	MAGOH	gene expression	1.21326e-52	gene expression(1.21326468500975e-52);mRNA 3_-end processing(0.103033925875392);mRNA export from nucleus(6.94421751199706e-05);mRNA metabolic process(2.06929902261014e-21);mRNA splicing, via spliceosome(5.11897548560515e-10);nuclear-transcribed mRNA catabolic process, nonsense-mediated decay(2.75248145213316e-14);regulation of alternative mRNA splicing, via spliceosome(0.0751047363474309);regulat…	gene expression
Q15717	ELAVL1	gene expression	1.21326e-52	3_-UTR-mediated mRNA stabilization(3.83595137208782e-06);gene expression(1.21326468500975e-52);mRNA metabolic process(2.06929902261014e-21);mRNA stabilization(0.0378951269751526);multicellular organismal development(0.0811392929443881);positive regulation of translation(3.7632463336758e-08);regulation of stem cell maintenance(0.0498699641023482);RNA metabolic process(4.60736285701955e-22)	gene expression
P61077	UBE2D3	gene expression	1.21326e-52	apoptotic process(6.20868145303765e-29);BMP signaling pathway(0.0253362137784826);cellular protein modification process(6.8860383417753e-07);cellular response to hypoxia(5.83281326671443e-17);DNA repair(3.4536114503015e-33);gene expression(1.21326468500975e-52);innate immune response(1.88358495767701e-52);MyD88-independent toll-like receptor signaling pathway(9.72220699590922e-24);negative regula…	gene expression
P46531	NOTCH1	gene expression	1.21326e-52	anagen(0.00295253370763113);aortic valve morphogenesis(0.0129666441010961);apoptotic process involved in embryonic digit morphogenesis(0.0255961678657793);arterial endothelial cell differentiation(0.0180585383764059);atrioventricular node development(0.00782081185832598);atrioventricular valve morphogenesis(0.00100500712592956);auditory receptor cell fate commitment(0.0205843906855511);axonogenes…	gene expression
Q00839	HNRNPU	gene expression	1.21326e-52	CRD-mediated mRNA stabilization(6.79535459692191e-05);gene expression(1.21326468500975e-52);mRNA splicing, via spliceosome(5.11897548560515e-10);osteoblast differentiation(5.36058901072047e-05);RNA processing(0.0107607562822915);RNA splicing(1.20809045844932e-12)	gene expression
O15372	EIF3H	gene expression	1.21326e-52	cellular protein metabolic process(1.8102536298093e-21);formation of translation preinitiation complex(5.61839031841332e-09);gene expression(1.21326468500975e-52);regulation of translational initiation(5.67078362294041e-08);translation(2.34266438951282e-15);translational initiation(2.18850229049269e-26)	gene expression
Q14683	SMC1A	gene expression	1.21326e-52	DNA repair(3.4536114503015e-33);gene expression(1.21326468500975e-52);meiosis(6.1878112016889e-07);mitotic cell cycle(1.78235686906502e-45);mitotic cell cycle checkpoint(0.000160160864094767);mitotic sister chromatid cohesion(0.0180585383764059);mitotic sister chromatid segregation(0.0592207244257719);mitotic spindle organization(1.65905984321207e-05);mRNA splicing, via spliceosome(5.118975485605…	gene expression
P55884	EIF3B	gene expression	1.21326e-52	cellular protein metabolic process(1.8102536298093e-21);formation of translation preinitiation complex(5.61839031841332e-09);gene expression(1.21326468500975e-52);regulation of translational initiation(5.67078362294041e-08);translation(2.34266438951282e-15);translational initiation(2.18850229049269e-26)	gene expression
P31946	YWHAB	gene expression	1.21326e-52	activation of MAPKK activity(6.63659299234539e-10);apoptotic process(6.20868145303765e-29);axon guidance(3.52633299960683e-18);cytoplasmic sequestering of protein(2.04927427758645e-05);epidermal growth factor receptor signaling pathway(4.99283404871122e-32);Fc-epsilon receptor signaling pathway(6.57853277604391e-23);fibroblast growth factor receptor signaling pathway(2.38981765792983e-22);gene ex…	gene expression
P35637	FUS	gene expression	1.21326e-52	cell death(1.13064262395802e-14);gene expression(1.21326468500975e-52);mRNA splicing, via spliceosome(5.11897548560515e-10);RNA splicing(1.20809045844932e-12)	gene expression
Q15365	PCBP1	gene expression	1.21326e-52	gene expression(1.21326468500975e-52);mRNA splicing, via spliceosome(5.11897548560515e-10);RNA splicing(1.20809045844932e-12)	gene expression
Q9UBQ5	EIF3K	gene expression	1.21326e-52	cellular protein metabolic process(1.8102536298093e-21);formation of translation preinitiation complex(5.61839031841332e-09);gene expression(1.21326468500975e-52);regulation of translational initiation(5.67078362294041e-08);translation(2.34266438951282e-15);translational initiation(2.18850229049269e-26)	gene expression
Q9UKV8	AGO2	gene expression	1.21326e-52	epidermal growth factor receptor signaling pathway(4.99283404871122e-32);Fc-epsilon receptor signaling pathway(6.57853277604391e-23);fibroblast growth factor receptor signaling pathway(2.38981765792983e-22);gene expression(1.21326468500975e-52);gene silencing by RNA(0.0925286471275805);innate immune response(1.88358495767701e-52);mRNA cleavage involved in gene silencing by miRNA(0.005227536400734…	gene expression
Q16637	SMN1	gene expression	1.21326e-52	cell death(1.13064262395802e-14);gene expression(1.21326468500975e-52);ncRNA metabolic process(0.054570566745914);nervous system development(3.21911910873522e-08);positive regulation of protein import into nucleus(1.60608162835698e-08);RNA metabolic process(4.60736285701955e-22);spliceosomal complex assembly(0.00150160513849754);spliceosomal snRNP assembly(0.0882443453067088)	gene expression
P11473	VDR	gene expression	1.21326e-52	bile acid signaling pathway(0.00262061696398276);calcium ion transport(0.00756273734153599);cell morphogenesis(3.10396898703564e-09);cellular calcium ion homeostasis(0.0565247087117761);decidualization(0.0661022454315416);gene expression(1.21326468500975e-52);intestinal absorption(0.0592207244257719);lactation(0.03542863544219);mammary gland branching involved in pregnancy(0.054570566745914);nega…	gene expression
Q15796	SMAD2	gene expression	1.21326e-52	activin receptor signaling pathway(0.00069513216029301);anterior/posterior pattern specification(0.00491092752748397);cell fate commitment(0.188420867146672);common-partner SMAD protein phosphorylation(0.0330147962489278);developmental growth(0.00072385848792018);embryonic cranial skeleton morphogenesis(0.0176552518076334);embryonic foregut morphogenesis(0.000185131499639119);endoderm formation(0…	gene expression
Q16539	MAPK14	gene expression	1.21326e-52	3_-UTR-mediated mRNA stabilization(3.83595137208782e-06);activation of MAPK activity(2.83492240287087e-08);angiogenesis(6.81198707605859e-06);apoptotic process(6.20868145303765e-29);blood coagulation(5.83358329341457e-34);cartilage condensation(0.0882443453067088);cell morphogenesis(3.10396898703564e-09);cell surface receptor signaling pathway(3.37526756500795e-06);cellular component movement(3.5…	gene expression
O75448	MED24	gene expression	1.21326e-52	androgen receptor signaling pathway(7.40064527234243e-06);gene expression(1.21326468500975e-52);intracellular steroid hormone receptor signaling pathway(0.0569019262970461);positive regulation of transcription, DNA-dependent(1.37927816714146e-31);protein heterooligomerization(9.20519236686855e-10);regulation of transcription from RNA polymerase II promoter(2.90256238626594e-12);stem cell maintena…	gene expression
P46108	CRK	innate immune response	1.88358e-52	activation of MAPKK activity(6.63659299234539e-10);blood coagulation(5.83358329341457e-34);ephrin receptor signaling pathway(0.105100130144493);Fc-gamma receptor signaling pathway involved in phagocytosis(1.47110430808848e-12);innate immune response(1.88358495767701e-52);insulin receptor signaling pathway(1.53034890056782e-07);neurotrophin TRK receptor signaling pathway(9.38670759968292e-44);plat…	innate immune response
P08238	HSP90AB1	innate immune response	1.88358e-52	axon guidance(3.52633299960683e-18);cellular response to interleukin-4(0.103033925875392);cellular response to organic cyclic compound(8.32456153390544e-05);Fc-gamma receptor signaling pathway involved in phagocytosis(1.47110430808848e-12);innate immune response(1.88358495767701e-52);negative regulation of neuron apoptotic process(6.53604310387938e-09);negative regulation of proteasomal ubiquitin…	innate immune response
P49959	MRE11A	innate immune response	1.88358e-52	base-excision repair(0.0018879374982286);cell proliferation(1.02939847411671e-13);response to DNA damage stimulus(5.0658836451137e-25);DNA catabolic process, endonucleolytic(0.000116955224663796);DNA duplex unwinding(7.63356962342149e-12);DNA recombination(4.46112951807165e-08);DNA repair(3.4536114503015e-33);double-strand break repair(2.67919371686319e-16);double-strand break repair via homologo…	innate immune response
P05067	APP	innate immune response	1.88358e-52	adult locomotory behavior(0.0304872519369456);axon cargo transport(0.00178478466817601);axon midline choice point recognition(0.0205843906855511);axonogenesis(0.0100135670610862);blood coagulation(5.83358329341457e-34);cell adhesion(3.46815610785096e-07);cellular copper ion homeostasis(0.0498699641023482);cholesterol metabolic process(0.0344221416410849);collateral sprouting in absence of injury(…	innate immune response
Q8IXJ6	SIRT2	innate immune response	1.88358e-52	autophagy(7.40522660547993e-05);cell death(1.13064262395802e-14);cellular lipid catabolic process(0.00782081185832598);cellular response to caloric restriction(0.00262061696398276);cellular response to epinephrine stimulus(0.0354614694648482);cellular response to hepatocyte growth factor stimulus(0.0354614694648482);cellular response to hypoxia(5.83281326671443e-17);cellular response to molecule …	innate immune response
P06493	CDK1	innate immune response	1.88358e-52	activation of MAPK activity(2.83492240287087e-08);activation of MAPKK activity(6.63659299234539e-10);anaphase-promoting complex-dependent proteasomal ubiquitin-dependent protein catabolic process(2.85270362492756e-06);apoptotic process(6.20868145303765e-29);axon guidance(3.52633299960683e-18);cell aging(0.00156991050338353);cell migration(4.9656341518485e-08);cellular response to hydrogen peroxid…	innate immune response
P42336	PIK3CA	innate immune response	1.88358e-52	angiogenesis(6.81198707605859e-06);blood coagulation(5.83358329341457e-34);cardiac muscle contraction(6.31987476489971e-05);endothelial cell migration(0.00712432188048649);epidermal growth factor receptor signaling pathway(4.99283404871122e-32);Fc-epsilon receptor signaling pathway(6.57853277604391e-23);Fc-gamma receptor signaling pathway involved in phagocytosis(1.47110430808848e-12);fibroblast …	innate immune response
P05412	JUN	innate immune response	1.88358e-52	aging(0.00286407844591043);angiogenesis(6.81198707605859e-06);axon regeneration(0.0839125132534385);cellular response to calcium ion(0.00740182089264568);cellular response to potassium ion starvation(0.00262061696398276);circadian rhythm(4.03536605763043e-05);Fc-epsilon receptor signaling pathway(6.57853277604391e-23);innate immune response(1.88358495767701e-52);leading edge cell differentiation(…	innate immune response
Q13114	TRAF3	innate immune response	1.88358e-52	apoptotic process(6.20868145303765e-29);innate immune response(1.88358495767701e-52);MyD88-independent toll-like receptor signaling pathway(9.72220699590922e-24);negative regulation of NF-kappaB transcription factor activity(0.00011661259768864);negative regulation of type I interferon production(4.52082768210137e-14);regulation of apoptotic process(9.05915522552894e-08);regulation of cytokine pr…	innate immune response
P07900	HSP90AA1	innate immune response	1.88358e-52	ATP catabolic process(2.44091793317933e-19);axon guidance(3.52633299960683e-18);chaperone-mediated protein complex assembly(0.00124155040357311);Fc-gamma receptor signaling pathway involved in phagocytosis(1.47110430808848e-12);G2/M transition of mitotic cell cycle(9.73222374869968e-23);innate immune response(1.88358495767701e-52);mitochondrial transport(0.00353430485402134);mitotic cell cycle(1.…	innate immune response
Q96EQ8	RNF125	innate immune response	1.88358e-52	innate immune response(1.88358495767701e-52);negative regulation of type I interferon production(4.52082768210137e-14)	innate immune response
P49841	GSK3B	innate immune response	1.88358e-52	axon guidance(3.52633299960683e-18);canonical Wnt receptor signaling pathway(8.33462102939171e-09);canonical Wnt receptor signaling pathway involved in positive regulation of apoptotic process(0.00060402222098122);cell migration(4.9656341518485e-08);cellular response to interleukin-3(0.0129666441010961);cellular response to mechanical stimulus(0.000232657829936774);circadian rhythm(4.035366057630…	innate immune response
Q02156	PRKCE	innate immune response	1.88358e-52	activation of phospholipase C activity(2.68089266995905e-05);apoptotic process(6.20868145303765e-29);blood coagulation(5.83358329341457e-34);cell adhesion(3.46815610785096e-07);cell cycle(4.18320209027088e-07);cell division(3.36382281384105e-08);cellular response to ethanol(0.0427235994294796);cellular response to hypoxia(5.83281326671443e-17);epidermal growth factor receptor signaling pathway(4.…	innate immune response
Q15653	NFKBIB	innate immune response	1.88358e-52	innate immune response(1.88358495767701e-52);MyD88-dependent toll-like receptor signaling pathway(2.63492802544596e-12);MyD88-independent toll-like receptor signaling pathway(9.72220699590922e-24);positive regulation of NF-kappaB transcription factor activity(2.79828493801795e-12);positive regulation of type I interferon production(7.13420089507382e-15);signal transduction(8.17716673985846e-23);t…	innate immune response
P62158	CALM1	innate immune response	1.88358e-52	activation of adenylate cyclase activity(0.00507247121963329);activation of phospholipase C activity(2.68089266995905e-05);blood coagulation(5.83358329341457e-34);carbohydrate metabolic process(0.0001989326848752);detection of calcium ion(0.0305550559668063);epidermal growth factor receptor signaling pathway(4.99283404871122e-32);Fc-epsilon receptor signaling pathway(6.57853277604391e-23);fibrobl…	innate immune response
P04626	ERBB2	innate immune response	1.88358e-52	axon guidance(3.52633299960683e-18);cell proliferation(1.02939847411671e-13);cell surface receptor signaling pathway(3.37526756500795e-06);enzyme linked receptor protein signaling pathway(0.0354614694648482);epidermal growth factor receptor signaling pathway(4.99283404871122e-32);Fc-epsilon receptor signaling pathway(6.57853277604391e-23);fibroblast growth factor receptor signaling pathway(2.3898…	innate immune response
P38936	CDKN1A	innate immune response	1.88358e-52	cell cycle arrest(7.01011535612657e-18);response to DNA damage stimulus(5.0658836451137e-25);cellular response to extracellular stimulus(0.100956166277068);cellular response to ionizing radiation(1.0647586500643e-06);cellular senescence(0.0569019262970461);DNA damage response, signal transduction by p53 class mediator resulting in cell cycle arrest(5.24172725141178e-06);epidermal growth factor re…	innate immune response
Q14164	IKBKE	innate immune response	1.88358e-52	immune response(7.14650015729769e-21);innate immune response(1.88358495767701e-52);intrinsic apoptotic signaling pathway in response to DNA damage(3.17321235352788e-08);MyD88-independent toll-like receptor signaling pathway(9.72220699590922e-24);negative regulation of type I interferon production(4.52082768210137e-14);NIK/NF-kappaB cascade(0.0155193070570038);positive regulation of I-kappaB kinas…	innate immune response
P35222	CTNNB1	innate immune response	1.88358e-52	adherens junction assembly(0.0180585383764059);androgen receptor signaling pathway(7.40064527234243e-06);anterior/posterior axis specification(0.0839125132534385);apoptotic process(6.20868145303765e-29);bone resorption(3.04727341385537e-07);branching involved in ureteric bud morphogenesis(0.00194443056457568);canonical Wnt receptor signaling pathway(8.33462102939171e-09);canonical Wnt receptor si…	innate immune response
P47755	CAPZA2	innate immune response	1.88358e-52	actin cytoskeleton organization(1.47554843644787e-06);actin filament capping(2.2653182883595e-05);blood coagulation(5.83358329341457e-34);cellular component movement(3.56199858982722e-08);innate immune response(1.88358495767701e-52);protein complex assembly(1.99720318323258e-19)	innate immune response
Q06187	BTK	innate immune response	1.88358e-52	adaptive immune response(0.00460777482093804);apoptotic signaling pathway(5.25488283129039e-08);B cell activation(0.00507247121963329);B cell receptor signaling pathway(0.127078792266389);calcium-mediated signaling(0.00120014335093062);cell maturation(6.94421751199706e-05);Fc-epsilon receptor signaling pathway(6.57853277604391e-23);histamine secretion by mast cell(0.00112031550572737);I-kappaB ki…	innate immune response
Q9Y4K3	TRAF6	innate immune response	1.88358e-52	activation of MAPK activity(2.83492240287087e-08);activation of NF-kappaB-inducing kinase activity(5.17392239468056e-06);activation of protein kinase activity(0.000116955224663796);antigen processing and presentation of exogenous peptide antigen via MHC class II(1.95513861904582e-08);apoptotic signaling pathway(5.25488283129039e-08);bone resorption(3.04727341385537e-07);cell development(0.0817286…	innate immune response
Q9Y2K1	ZBTB1	innate immune response	1.88358e-52	B cell differentiation(1.95513861904582e-08);innate immune response(1.88358495767701e-52);mRNA transcription from RNA polymerase II promoter(0.00100500712592956);negative regulation of transcription from RNA polymerase II promoter(1.47266232322172e-44);positive regulation of natural killer cell differentiation(0.0305550559668063);positive regulation of pro-T cell differentiation(0.002620616963982…	innate immune response
Q9Y572	RIPK3	innate immune response	1.88358e-52	activation of protein kinase activity(0.000116955224663796);amyloid fibril formation(0.00782081185832598);apoptotic signaling pathway(5.25488283129039e-08);cellular protein modification process(6.8860383417753e-07);I-kappaB kinase/NF-kappaB cascade(3.04727341385537e-07);innate immune response(1.88358495767701e-52);lymph node development(0.0751047363474309);MyD88-independent toll-like receptor sig…	innate immune response
Q12933	TRAF2	innate immune response	1.88358e-52	activation of cysteine-type endopeptidase activity involved in apoptotic process(0.00298884821132576);activation of NF-kappaB-inducing kinase activity(5.17392239468056e-06);apoptotic process(6.20868145303765e-29);apoptotic signaling pathway(5.25488283129039e-08);cellular protein complex assembly(0.0153290463726711);innate immune response(1.88358495767701e-52);negative regulation of glial cell apo…	innate immune response
Q9UII4	HERC5	innate immune response	1.88358e-52	cytokine-mediated signaling pathway(1.02136533943602e-16);defense response to virus(4.62974071003108e-05);innate immune response(1.88358495767701e-52);ISG15-protein conjugation(0.000141959570295672);negative regulation of type I interferon production(4.52082768210137e-14);protein ubiquitination involved in ubiquitin-dependent protein catabolic process(1.83046736054095e-05);regulation of cyclin-de…	innate immune response
P52907	CAPZA1	innate immune response	1.88358e-52	actin cytoskeleton organization(1.47554843644787e-06);actin filament capping(2.2653182883595e-05);blood coagulation(5.83358329341457e-34);cellular component movement(3.56199858982722e-08);innate immune response(1.88358495767701e-52);protein complex assembly(1.99720318323258e-19)	innate immune response
P00519	ABL1	innate immune response	1.88358e-52	actin cytoskeleton organization(1.47554843644787e-06);autophagy(7.40522660547993e-05);axon guidance(3.52633299960683e-18);blood coagulation(5.83358329341457e-34);cell adhesion(3.46815610785096e-07);cellular protein modification process(6.8860383417753e-07);response to DNA damage stimulus(5.0658836451137e-25);DNA damage induced protein phosphorylation(0.00060402222098122);Fc-gamma receptor signali…	innate immune response
P00533	EGFR	innate immune response	1.88358e-52	activation of phospholipase A2 activity by calcium-mediated signaling(0.00522753640073456);activation of phospholipase C activity(2.68089266995905e-05);alkanesulfonate metabolic process(0.0230969164281125);astrocyte activation(0.0498699641023482);axon guidance(3.52633299960683e-18);cell proliferation(1.02939847411671e-13);cell surface receptor signaling pathway(3.37526756500795e-06);cellular resp…	innate immune response
Q15418	RPS6KA1	innate immune response	1.88358e-52	axon guidance(3.52633299960683e-18);cell cycle(4.18320209027088e-07);innate immune response(1.88358495767701e-52);MyD88-dependent toll-like receptor signaling pathway(2.63492802544596e-12);MyD88-independent toll-like receptor signaling pathway(9.72220699590922e-24);negative regulation of apoptotic process(6.38379917804347e-27);negative regulation of cysteine-type endopeptidase activity involved i…	innate immune response
P60953	CDC42	innate immune response	1.88358e-52	actin cytoskeleton organization(1.47554843644787e-06);actin filament branching(0.0129666441010961);actin filament bundle assembly(0.0157079535519576);adherens junction organization(0.000431026079451173);axon guidance(3.52633299960683e-18);blood coagulation(5.83358329341457e-34);canonical Wnt receptor signaling pathway(8.33462102939171e-09);cardiac conduction system development(0.0230969164281125)…	innate immune response
P51617	IRAK1	innate immune response	1.88358e-52	activation of MAPK activity(2.83492240287087e-08);activation of NF-kappaB-inducing kinase activity(5.17392239468056e-06);cellular response to hypoxia(5.83281326671443e-17);innate immune response(1.88358495767701e-52);interleukin-1-mediated signaling pathway(0.000367937867550136);JNK cascade(3.5838248499552e-05);lipopolysaccharide-mediated signaling pathway(6.1878112016889e-07);MyD88-dependent tol…	innate immune response
P10909	CLU	innate immune response	1.88358e-52	blood coagulation(5.83358329341457e-34);cell morphogenesis(3.10396898703564e-09);central nervous system myelin maintenance(0.0180585383764059);chaperone-mediated protein complex assembly(0.00124155040357311);chaperone-mediated protein folding(0.00507247121963329);complement activation(0.313446969223902);complement activation, classical pathway(0.301923555790996);innate immune response(1.883584957…	innate immune response
Q8NI77	KIF18A	mitotic cell cycle	1.78236e-45	antigen processing and presentation of exogenous peptide antigen via MHC class II(1.95513861904582e-08);ATP catabolic process(2.44091793317933e-19);blood coagulation(5.83358329341457e-34);metabolic process(0.0508869491764127);microtubule depolymerization(0.0155193070570038);microtubule-based movement(0.00211638948979436);mitotic cell cycle(1.78235686906502e-45);mitotic metaphase plate congression…	mitotic cell cycle
Q9BV73	CEP250	mitotic cell cycle	1.78236e-45	centriole-centriole cohesion(0.0155193070570038);G2/M transition of mitotic cell cycle(9.73222374869968e-23);mitotic cell cycle(1.78235686906502e-45);protein localization(3.45909937556022e-07);protein localization to organelle(0.00276926642749576);regulation of centriole-centriole cohesion(6.84876361547951e-06)	mitotic cell cycle
P35251	RFC1	mitotic cell cycle	1.78236e-45	DNA repair(3.4536114503015e-33);DNA strand elongation involved in DNA replication(7.4593910355256e-05);DNA-dependent DNA replication(5.47909500181899e-05);mitotic cell cycle(1.78235686906502e-45);negative regulation of transcription from RNA polymerase II promoter(1.47266232322172e-44);nucleotide-excision repair(1.18343327420506e-08);nucleotide-excision repair, DNA gap filling(1.72945089672387e-0…	mitotic cell cycle
Q96CW5	TUBGCP3	mitotic cell cycle	1.78236e-45	G2/M transition of mitotic cell cycle(9.73222374869968e-23);microtubule nucleation(0.0475006209375881);mitotic cell cycle(1.78235686906502e-45);single fertilization(0.00797037081224884)	mitotic cell cycle
P24941	CDK2	mitotic cell cycle	1.78236e-45	anaphase-promoting complex-dependent proteasomal ubiquitin-dependent protein catabolic process(2.85270362492756e-06);blood coagulation(5.83358329341457e-34);cellular response to nitric oxide(0.0155193070570038);centrosome duplication(0.0728724889625222);DNA damage response, signal transduction by p53 class mediator resulting in cell cycle arrest(5.24172725141178e-06);DNA repair(3.4536114503015e-3…	mitotic cell cycle
P61981	YWHAG	mitotic cell cycle	1.78236e-45	apoptotic process(6.20868145303765e-29);cellular response to insulin stimulus(0.0319452538098846);G2/M transition of mitotic cell cycle(9.73222374869968e-23);intrinsic apoptotic signaling pathway(3.74921230902076e-19);membrane organization(3.097855853152e-13);mitotic cell cycle(1.78235686906502e-45);negative regulation of protein kinase activity(0.0267093220540171);negative regulation of protein …	mitotic cell cycle
O00716	E2F3	mitotic cell cycle	1.78236e-45	mitotic cell cycle(1.78235686906502e-45);G2 phase of mitotic cell cycle(5.7698763484395e-09);Notch signaling pathway(4.24104740999017e-21);positive regulation of cell proliferation(6.47745791674565e-15);positive regulation of transcription, DNA-dependent(1.37927816714146e-31);transcription initiation from RNA polymerase II promoter(6.18702459845528e-17)	mitotic cell cycle
P12004	PCNA	mitotic cell cycle	1.78236e-45	base-excision repair(0.0018879374982286);cell proliferation(1.02939847411671e-13);DNA repair(3.4536114503015e-33);DNA replication(3.14475732442198e-06);DNA strand elongation involved in DNA replication(7.4593910355256e-05);epithelial cell differentiation(0.00236844164613199);G1/S transition of mitotic cell cycle(8.6415159544682e-21);heart development(3.57520729084818e-05);leading strand elongatio…	mitotic cell cycle
Q14204	DYNC1H1	mitotic cell cycle	1.78236e-45	antigen processing and presentation of exogenous peptide antigen via MHC class II(1.95513861904582e-08);cell death(1.13064262395802e-14);cytoplasmic mRNA processing body assembly(0.0354614694648482);G2/M transition of mitotic cell cycle(9.73222374869968e-23);microtubule-based movement(0.00211638948979436);mitotic cell cycle(1.78235686906502e-45);mitotic spindle organization(1.65905984321207e-05);…	mitotic cell cycle
P27694	RPA1	mitotic cell cycle	1.78236e-45	base-excision repair(0.0018879374982286);DNA recombinase assembly(0.0129666441010961);DNA recombination(4.46112951807165e-08);DNA repair(3.4536114503015e-33);DNA replication(3.14475732442198e-06);DNA strand elongation involved in DNA replication(7.4593910355256e-05);DNA-dependent DNA replication(5.47909500181899e-05);double-strand break repair(2.67919371686319e-16);double-strand break repair via …	mitotic cell cycle
P11802	CDK4	mitotic cell cycle	1.78236e-45	cell division(3.36382281384105e-08);circadian rhythm(4.03536605763043e-05);G1/S transition of mitotic cell cycle(8.6415159544682e-21);mitotic cell cycle(1.78235686906502e-45);negative regulation of cell cycle arrest(1.19619902817892e-05);organ regeneration(2.14667309988817e-05);positive regulation of apoptotic process(5.21652554413277e-14);positive regulation of cell proliferation(6.4774579167456…	mitotic cell cycle
P49674	CSNK1E	mitotic cell cycle	1.78236e-45	cellular protein localization(0.000777263117928894);circadian regulation of gene expression(6.92322307271822e-12);DNA repair(3.4536114503015e-33);G2/M transition of mitotic cell cycle(9.73222374869968e-23);mitotic cell cycle(1.78235686906502e-45);negative regulation of Wnt receptor signaling pathway(7.61186507423417e-05);positive regulation of canonical Wnt receptor signaling pathway(6.9442175119…	mitotic cell cycle
Q99741	CDC6	mitotic cell cycle	1.78236e-45	DNA replication(3.14475732442198e-06);DNA replication checkpoint(0.0180585383764059);G1/S transition of mitotic cell cycle(8.6415159544682e-21);mitotic cell cycle(1.78235686906502e-45);mitosis(1.11596833748797e-08);negative regulation of cell proliferation(8.95519611518238e-18);negative regulation of DNA replication(0.00797037081224884);positive regulation of chromosome segregation(0.002620616963…	mitotic cell cycle
P68400	CSNK2A1	mitotic cell cycle	1.78236e-45	axon guidance(3.52633299960683e-18);chaperone-mediated protein folding(0.00507247121963329);mitotic cell cycle(1.78235686906502e-45);mitotic spindle checkpoint(0.000188786106194757);negative regulation of cysteine-type endopeptidase activity involved in apoptotic process(1.12131835536746e-05);positive regulation of cell growth(0.000176840837225612);positive regulation of cell proliferation(6.4774…	mitotic cell cycle
P36873	PPP1CC	mitotic cell cycle	1.78236e-45	cell division(3.36382281384105e-08);circadian regulation of gene expression(6.92322307271822e-12);entrainment of circadian clock by photoperiod(0.00100500712592956);glycogen metabolic process(0.000185131499639119);mitotic cell cycle(1.78235686906502e-45);negative regulation of transforming growth factor beta receptor signaling pathway(6.59930550752185e-07);protein dephosphorylation(0.075861546541…	mitotic cell cycle
Q14203	DCTN1	mitotic cell cycle	1.78236e-45	activation of signaling protein activity involved in unfolded protein response(2.00596751419615e-08);antigen processing and presentation of exogenous peptide antigen via MHC class II(1.95513861904582e-08);cell death(1.13064262395802e-14);cellular protein metabolic process(1.8102536298093e-21);endoplasmic reticulum unfolded protein response(4.14435264394125e-10);G2/M transition of mitotic cell cyc…	mitotic cell cycle
P02545	LMNA	mitotic cell cycle	1.78236e-45	activation of signaling protein activity involved in unfolded protein response(2.00596751419615e-08);apoptotic process(6.20868145303765e-29);cellular component disassembly involved in execution phase of apoptosis(5.3068071145172e-11);cellular protein metabolic process(1.8102536298093e-21);cellular response to hypoxia(5.83281326671443e-17);endoplasmic reticulum unfolded protein response(4.14435264…	mitotic cell cycle
Q8WYP5	AHCTF1	mitotic cell cycle	1.78236e-45	cytokinesis(7.96247254881389e-05);mitotic cell cycle(1.78235686906502e-45);mRNA transport(1.97165091967197e-06);nuclear pore complex assembly(6.18257991033148e-07);protein transport(1.58809262028809e-06)	mitotic cell cycle
Q9Y2I6	NINL	mitotic cell cycle	1.78236e-45	G2/M transition of mitotic cell cycle(9.73222374869968e-23);mitotic cell cycle(1.78235686906502e-45)	mitotic cell cycle
P78396	CCNA1	mitotic cell cycle	1.78236e-45	G1/S transition of mitotic cell cycle(8.6415159544682e-21);G2/M transition of mitotic cell cycle(9.73222374869968e-23);male meiosis I(0.105100130144493);mitotic cell cycle(1.78235686906502e-45);mitosis(1.11596833748797e-08);regulation of cyclin-dependent protein serine/threonine kinase activity(8.05512223586451e-07);regulation of G2/M transition of mitotic cell cycle(0.0280821970788472);regulatio…	mitotic cell cycle
P14635	CCNB1	mitotic cell cycle	1.78236e-45	anaphase-promoting complex-dependent proteasomal ubiquitin-dependent protein catabolic process(2.85270362492756e-06);cellular response to fatty acid(4.37118396304699e-05);cellular response to hypoxia(5.83281326671443e-17);cellular response to iron(III) ion(0.00522753640073456);cellular response to organic cyclic compound(8.32456153390544e-05);digestive tract development(0.000431026079451173);G1/S…	mitotic cell cycle
P24385	CCND1	mitotic cell cycle	1.78236e-45	canonical Wnt receptor signaling pathway(8.33462102939171e-09);cell division(3.36382281384105e-08);response to DNA damage stimulus(5.0658836451137e-25);endoplasmic reticulum unfolded protein response(4.14435264394125e-10);fat cell differentiation(0.0304872519369456);G1/S transition of mitotic cell cycle(8.6415159544682e-21);lactation(0.03542863544219);Leydig cell differentiation(0.003948339396884…	mitotic cell cycle
O14879	IFIT3	negative regulation of apoptotic process	6.3838e-27	cellular response to interferon-alpha(0.00089567424078481);cytokine-mediated signaling pathway(1.02136533943602e-16);defense response to virus(4.62974071003108e-05);negative regulation of apoptotic process(6.38379917804347e-27);negative regulation of cell proliferation(8.95519611518238e-18);response to virus(0.000540070549809031);type I interferon-mediated signaling pathway(0.000390868906425056)	negative regulation of apoptotic process
Q13286	CLN3	negative regulation of apoptotic process	6.3838e-27	regulation of action potential(0.0592207244257719);amyloid precursor protein catabolic process(0.000301826744555431);arginine transport(0.00522753640073456);associative learning(0.0773248143178049);autophagic vacuole fusion(0.0354614694648482);cell death(1.13064262395802e-14);cellular amino acid metabolic process(0.0172588758881024);ceramide metabolic process(0.06837129216312);cytosolic calcium i…	negative regulation of apoptotic process
O95352	ATG7	negative regulation of apoptotic process	6.3838e-27	adult walking behavior(0.0201034317135379);C-terminal protein lipidation(0.06837129216312);cardiac muscle cell development(0.00276926642749576);cellular amino acid metabolic process(0.0172588758881024);cellular protein modification process(6.8860383417753e-07);cellular response to hyperoxia(0.0155193070570038);cellular response to nitrogen starvation(0.0104004966992646);cellular response to starv…	negative regulation of apoptotic process
O95817	BAG3	negative regulation of apoptotic process	6.3838e-27	brain development(0.00199477448039431);cellular response to mechanical stimulus(0.000232657829936774);extrinsic apoptotic signaling pathway in absence of ligand(0.0201034317135379);extrinsic apoptotic signaling pathway via death domain receptors(0.0117441059209492);negative regulation of apoptotic process(6.38379917804347e-27);negative regulation of striated muscle cell apoptotic process(0.015519…	negative regulation of apoptotic process
Q13363	CTBP1	negative regulation of transcription from RNA polymerase II promoter	1.47266e-44	Golgi organization(2.68089266995905e-05);negative regulation of cell proliferation(8.95519611518238e-18);negative regulation of histone acetylation(0.0751047363474309);negative regulation of histone H4 acetylation(0.00522753640073456);negative regulation of transcription from RNA polymerase II promoter(1.47266232322172e-44);negative regulation of transcription, DNA-dependent(4.28018374027169e-36)…	negative regulation of transcription from RNA polymerase II promoter
O15379	HDAC3	negative regulation of transcription from RNA polymerase II promoter	1.47266e-44	cellular lipid metabolic process(0.000102616511388032);chromatin modification(0.000318702388480314);circadian regulation of gene expression(6.92322307271822e-12);negative regulation of apoptotic process(6.38379917804347e-27);negative regulation of cell cycle(0.000477296949666929);negative regulation of JNK cascade(0.00295253370763113);negative regulation of transcription from RNA polymerase II pr…	negative regulation of transcription from RNA polymerase II promoter
P35462	DRD3	negative regulation of transcription from RNA polymerase II promoter	1.47266e-44	acid secretion(0.00782081185832598);adenylate cyclase-activating dopamine receptor signaling pathway(0.00225207716700211);adenylate cyclase-inhibiting dopamine receptor signaling pathway(0.00241899183946171);arachidonic acid secretion(0.0427235994294796);behavioral response to cocaine(0.0661022454315416);cellular calcium ion homeostasis(0.0565247087117761);circadian regulation of gene expression(…	negative regulation of transcription from RNA polymerase II promoter
Q8WUI4	HDAC7	negative regulation of transcription from RNA polymerase II promoter	1.47266e-44	cell-cell junction assembly(0.0638208346501513);negative regulation of interleukin-2 production(0.0706280237589378);negative regulation of osteoblast differentiation(1.97165091967197e-06);negative regulation of transcription from RNA polymerase II promoter(1.47266232322172e-44);Notch signaling pathway(4.24104740999017e-21);positive regulation of cell migration involved in sprouting angiogenesis(0…	negative regulation of transcription from RNA polymerase II promoter
O75461	E2F6	negative regulation of transcription from RNA polymerase II promoter	1.47266e-44	negative regulation of transcription from RNA polymerase II promoter(1.47266232322172e-44);regulation of transcription involved in G1/S phase of mitotic cell cycle(2.65350614106313e-13);transcription, DNA-dependent(1.46757268879538e-32)	negative regulation of transcription from RNA polymerase II promoter
P51532	SMARCA4	negative regulation of transcription from RNA polymerase II promoter	1.47266e-44	aortic smooth muscle cell differentiation(0.000301826744555431);ATP catabolic process(2.44091793317933e-19);ATP-dependent chromatin remodeling(1.7606727088242e-06);blastocyst growth(0.000188786106194757);blastocyst hatching(0.0498699641023482);cell morphogenesis(3.10396898703564e-09);chromatin remodeling(1.98335007364482e-19);definitive erythrocyte differentiation(0.0255961678657793);DNA methylat…	negative regulation of transcription from RNA polymerase II promoter
P40337	VHL	negative regulation of transcription from RNA polymerase II promoter	1.47266e-44	cell morphogenesis(3.10396898703564e-09);cellular response to hypoxia(5.83281326671443e-17);negative regulation of apoptotic process(6.38379917804347e-27);negative regulation of cell proliferation(8.95519611518238e-18);negative regulation of transcription from RNA polymerase II promoter(1.47266232322172e-44);negative regulation of transcription from RNA polymerase II promoter in response to hypox…	negative regulation of transcription from RNA polymerase II promoter
P49768	PSEN1	negative regulation of transcription from RNA polymerase II promoter	1.47266e-44	activation of MAPKK activity(6.63659299234539e-10);amyloid precursor protein catabolic process(0.000301826744555431);anagen(0.00295253370763113);autophagic vacuole assembly(0.000160160864094767);beta-amyloid formation(0.0205843906855511);beta-amyloid metabolic process(0.054570566745914);blood vessel development(0.186838909996296);brain morphogenesis(0.105100130144493);Cajal-Retzius cell different…	negative regulation of transcription from RNA polymerase II promoter
P56524	HDAC4	negative regulation of transcription from RNA polymerase II promoter	1.47266e-44	B cell activation(0.00507247121963329);B cell differentiation(1.95513861904582e-08);cardiac muscle hypertrophy in response to stress(0.0615270107338179);chromatin remodeling(1.98335007364482e-19);histone deacetylation(9.16941833734069e-09);histone H3 deacetylation(5.23723965262341e-13);histone H4 deacetylation(5.23723965262341e-13);inflammatory response(0.00319532800394155);negative regulation of…	negative regulation of transcription from RNA polymerase II promoter
Q15022	SUZ12	negative regulation of transcription from RNA polymerase II promoter	1.47266e-44	histone ubiquitination(0.000440374655648537);negative regulation of cell differentiation(0.136624993430379);negative regulation of transcription from RNA polymerase II promoter(1.47266232322172e-44);positive regulation of cell proliferation(6.47745791674565e-15);transcription, DNA-dependent(1.46757268879538e-32)	negative regulation of transcription from RNA polymerase II promoter
P54259	ATN1	negative regulation of transcription from RNA polymerase II promoter	1.47266e-44	cell migration(4.9656341518485e-08);central nervous system development(0.00794516346644414);maintenance of cell polarity(0.0104004966992646);negative regulation of transcription from RNA polymerase II promoter(1.47266232322172e-44);neuron apoptotic process(2.65748658536386e-08);toxin metabolic process(0.0451185162046337);transcription, DNA-dependent(1.46757268879538e-32)	negative regulation of transcription from RNA polymerase II promoter
P06733	ENO1	negative regulation of transcription from RNA polymerase II promoter	1.47266e-44	carbohydrate metabolic process(0.0001989326848752);gluconeogenesis(0.173834530679695);glucose metabolic process(5.74562035776658e-07);glycolysis(0.019778922124452);negative regulation of cell growth(3.36382281384105e-08);negative regulation of transcription from RNA polymerase II promoter(1.47266232322172e-44);negative regulation of transcription, DNA-dependent(4.28018374027169e-36);response to v…	negative regulation of transcription from RNA polymerase II promoter
P15822	HIVEP1	negative regulation of transcription from RNA polymerase II promoter	1.47266e-44	negative regulation of transcription from RNA polymerase II promoter(1.47266232322172e-44);transcription, DNA-dependent(1.46757268879538e-32)	negative regulation of transcription from RNA polymerase II promoter
Q15910	EZH2	negative regulation of transcription from RNA polymerase II promoter	1.47266e-44	cerebellar cortex development(0.0280821970788472);chromatin organization(2.03289559308079e-09);G1 to G0 transition(0.0354614694648482);histone H3-K27 methylation(0.00782081185832598);negative regulation of epidermal cell differentiation(0.0104004966992646);negative regulation of G1/S transition of mitotic cell cycle(0.000137466547247998);negative regulation of gene expression, epigenetic(0.018058…	negative regulation of transcription from RNA polymerase II promoter
P10242	MYB	negative regulation of transcription from RNA polymerase II promoter	1.47266e-44	B cell differentiation(1.95513861904582e-08);blood coagulation(5.83358329341457e-34);calcium ion transport(0.00756273734153599);chromatin remodeling(1.98335007364482e-19);embryonic digestive tract development(0.0569019262970461);G1/S transition of mitotic cell cycle(8.6415159544682e-21);homeostasis of number of cells(0.00136866310138866);in utero embryonic development(2.29221326506903e-13);negati…	negative regulation of transcription from RNA polymerase II promoter
P51531	SMARCA2	negative regulation of transcription from RNA polymerase II promoter	1.47266e-44	aortic smooth muscle cell differentiation(0.000301826744555431);ATP catabolic process(2.44091793317933e-19);chromatin remodeling(1.98335007364482e-19);negative regulation of cell growth(3.36382281384105e-08);negative regulation of cell proliferation(8.95519611518238e-18);negative regulation of transcription from RNA polymerase II promoter(1.47266232322172e-44);negative regulation of transcription…	negative regulation of transcription from RNA polymerase II promoter
Q9NRC8	SIRT7	negative regulation of transcription from RNA polymerase II promoter	1.47266e-44	histone H3 deacetylation(5.23723965262341e-13);histone H4 deacetylation(5.23723965262341e-13);negative regulation of transcription from RNA polymerase II promoter(1.47266232322172e-44);positive regulation of transcription on exit from mitosis(0.00262061696398276);rRNA transcription(0.105100130144493)	negative regulation of transcription from RNA polymerase II promoter
Q9HC52	CBX8	negative regulation of transcription from RNA polymerase II promoter	1.47266e-44	histone ubiquitination(0.000440374655648537);negative regulation of transcription from RNA polymerase II promoter(1.47266232322172e-44);transcription, DNA-dependent(1.46757268879538e-32)	negative regulation of transcription from RNA polymerase II promoter
P51858	HDGF	negative regulation of transcription from RNA polymerase II promoter	1.47266e-44	activation of signaling protein activity involved in unfolded protein response(2.00596751419615e-08);cell proliferation(1.02939847411671e-13);cellular protein metabolic process(1.8102536298093e-21);endoplasmic reticulum unfolded protein response(4.14435264394125e-10);negative regulation of transcription from RNA polymerase II promoter(1.47266232322172e-44);signal transduction(8.17716673985846e-23)	negative regulation of transcription from RNA polymerase II promoter
Q92769	HDAC2	negative regulation of transcription from RNA polymerase II promoter	1.47266e-44	ATP-dependent chromatin remodeling(1.7606727088242e-06);blood coagulation(5.83358329341457e-34);cardiac muscle cell development(0.00276926642749576);cellular response to heat(0.000274600187003535);chromatin remodeling(1.98335007364482e-19);circadian regulation of gene expression(6.92322307271822e-12);dendrite development(0.0184581315402973);embryonic digit morphogenesis(0.00167196774402546);epide…	negative regulation of transcription from RNA polymerase II promoter
Q9ULU4	ZMYND8	negative regulation of transcription from RNA polymerase II promoter	1.47266e-44	negative regulation of transcription from RNA polymerase II promoter(1.47266232322172e-44)	negative regulation of transcription from RNA polymerase II promoter
Q14469	HES1	negative regulation of transcription from RNA polymerase II promoter	1.47266e-44	adenohypophysis development(0.000367937867550136);artery morphogenesis(0.105100130144493);ascending aorta morphogenesis(0.0155193070570038);auditory receptor cell fate determination(0.0129666441010961);cardiac neural crest cell development involved in outflow tract morphogenesis(0.0129666441010961);cell adhesion(3.46815610785096e-07);cell maturation(6.94421751199706e-05);cell migration(4.96563415…	negative regulation of transcription from RNA polymerase II promoter
P48431	SOX2	negative regulation of transcription from RNA polymerase II promoter	1.47266e-44	adenohypophysis development(0.000367937867550136);cell cycle arrest(7.01011535612657e-18);cerebral cortex development(0.00403964788718931);chromatin organization(2.03289559308079e-09);detection of mechanical stimulus involved in equilibrioception(0.00782081185832598);detection of mechanical stimulus involved in sensory perception of sound(0.0592207244257719);diencephalon morphogenesis(0.018058538…	negative regulation of transcription from RNA polymerase II promoter
O75530	EED	negative regulation of transcription, DNA-dependent	4.28018e-36	negative regulation of transcription, DNA-dependent(4.28018374027169e-36);positive regulation of histone H3-K27 methylation(0.0255961678657793);regulation of gene expression by genetic imprinting(0.00768385095014696);transcription, DNA-dependent(1.46757268879538e-32)	negative regulation of transcription, DNA-dependent
P27348	YWHAQ	negative regulation of transcription, DNA-dependent	4.28018e-36	apoptotic process(6.20868145303765e-29);intrinsic apoptotic signaling pathway(3.74921230902076e-19);membrane organization(3.097855853152e-13);negative regulation of transcription, DNA-dependent(4.28018374027169e-36);positive regulation of protein insertion into mitochondrial membrane involved in apoptotic signaling pathway(7.66979589302134e-07);protein targeting(1.51449800975818e-06);small GTPase…	negative regulation of transcription, DNA-dependent
[truncated: 194 more rows]
